# Supplementary material for: Identification of 22 candidate structured RNAs in bacteria using the CMfinder comparative genomics pipeline
Source: PubMed Central journal article supplement — Nucleic Acids Res. 2007 Jul 9;35(14):4809–19. doi: 10.1093/nar/gkm487 (PMC1950547; doi:10.1093/nar/gkm487), 2007-07-09
Supplement: nar_gkm487_1.pdf [file nar_gkm487_1.pdf]

# The CMfinder comparative genomics pipeline discovers 22 novel putative RNAs in bacteria

## Supplementary Data: additional analysis and data on motifs

Zasha Weinberg, Jeffrey E. Barrick, Zizhen Yao, Adam Roth, Jane N. Kim, Jeremy Gore, Joy Xin Wang, Elaine R. Lee, Kirsten Block, Narasimhan Sudarsan, Shane Neph, Martin Tompa, Walter L. Ruzzo and Ronald R. Breaker

May 29, 2007

### Contents

|          |                                                            |          |
|----------|------------------------------------------------------------|----------|
| <b>1</b> | <b>Explanation of figures in this supplement</b>           | <b>2</b> |
| 1.1      | Notes . . . . .                                            | 3        |
| 1.2      | Taxonomy and motif instance codes . . . . .                | 3        |
| 1.3      | Gene context . . . . .                                     | 3        |
| 1.3.1    | Gene context: part 1 . . . . .                             | 3        |
| 1.3.2    | Gene context: part 2 . . . . .                             | 4        |
| 1.4      | Multiple sequence alignment . . . . .                      | 4        |
| 1.5      | Notes on display of gene contexts and alignments . . . . . | 5        |
| <b>2</b> | <b>Motif data and further analysis</b>                     | <b>6</b> |
| 2.1      | The GEMM motif . . . . .                                   | 6        |
| 2.1.1    | Additional analysis . . . . .                              | 6        |
| 2.1.2    | Genome context and alignment . . . . .                     | 6        |
| 2.2      | The SAH motif . . . . .                                    | 34       |
| 2.3      | The COG4708 motif . . . . .                                | 37       |
| 2.3.1    | Annotation of start codon in COG4708 genes . . . . .       | 39       |
| 2.4      | The <i>sucA</i> motif . . . . .                            | 40       |
| 2.5      | The 23S-methyl motif . . . . .                             | 43       |
| 2.6      | The <i>hemB</i> motif . . . . .                            | 46       |
| 2.7      | anti-hemB . . . . .                                        | 51       |

|        |                                                                                                               |     |
|--------|---------------------------------------------------------------------------------------------------------------|-----|
| 2.8    | The MAEB motif . . . . .                                                                                      | 54  |
| 2.8.1  | Additional analysis . . . . .                                                                                 | 54  |
| 2.8.2  | Gene context and alignment . . . . .                                                                          | 55  |
| 2.9    | The mini- <i>ykkC</i> motif . . . . .                                                                         | 80  |
| 2.9.1  | Gene families associated with the <i>ykkC</i> motif. . . . .                                                  | 80  |
| 2.9.2  | False positive rates and mini- <i>ykkC</i> . . . . .                                                          | 80  |
| 2.9.3  | our manual mini- <i>ykkC</i> alignment, and gene context information . . . . .                                | 81  |
| 2.9.4  | Automated, iteration 0: CMfinder’s original prediction for mini- <i>ykkC</i> . . . . .                        | 95  |
| 2.9.5  | Automated, iteration 1: Pipeline’s prediction for mini- <i>ykkC</i> , after one homology search . . . . .     | 95  |
| 2.9.6  | Automated, iteration 2: mini- <i>ykkC</i> prediction after 2 iterations of homology search/CMfinder . . . . . | 96  |
| 2.10   | The <i>purD</i> motif . . . . .                                                                               | 97  |
| 2.10.1 | In-line probing . . . . .                                                                                     | 97  |
| 2.10.2 | Genome context and alignment . . . . .                                                                        | 98  |
| 2.11   | The 6C motif . . . . .                                                                                        | 100 |
| 2.11.1 | Possible alternate structure surrounding P2 stem . . . . .                                                    | 103 |
| 2.12   | alpha-transposase motif . . . . .                                                                             | 104 |
| 2.13   | excisionase motif . . . . .                                                                                   | 110 |
| 2.13.1 | Possible misannotation of excisionase genes . . . . .                                                         | 110 |
| 2.13.2 | Genome context and alignment . . . . .                                                                        | 110 |
| 2.14   | The ATPC motif . . . . .                                                                                      | 112 |
| 2.15   | The cyano-30S motif . . . . .                                                                                 | 119 |
| 2.16   | The lacto-1 ( <i>Lactobacillus</i> ) motif . . . . .                                                          | 122 |
| 2.17   | The lacto-2 ( <i>Lactobacillus</i> ) motif . . . . .                                                          | 127 |
| 2.18   | The TD-1 <i>T. denticola</i> motif . . . . .                                                                  | 141 |
| 2.19   | The TD-2 <i>T. denticola</i> motif . . . . .                                                                  | 145 |
| 2.20   | gamma-150 . . . . .                                                                                           | 148 |
| 2.21   | coccus-1 . . . . .                                                                                            | 152 |

## 1 Explanation of figures in this supplement

In Section 2, alignments and gene context are given for all motifs. In some cases, additional analysis is described that is of a specialized nature, and was therefore not included in the main text.

All motifs are shown with the following data (explained in detail below):

- Notes on specific instances of the motif.
- Taxonomy of all motif instances, with codes assigned to each instance
- Gene context of all motif instances, i.e., what genes surround each

| abbrev. of hits    | taxonomy of species                                                                                  |
|--------------------|------------------------------------------------------------------------------------------------------|
| Van-1-1 to Van-1-1 | $\gamma$ -proteobacteria Vibrionales Vibrionaceae <i>Vibrio angustum</i> S14                         |
| Vch-1-1 to Vch-1-2 | $\gamma$ -proteobacteria Vibrionales Vibrionaceae <i>Vibrio cholerae</i> MO10                        |
| Vch-2-1 to Vch-2-2 | $\gamma$ -proteobacteria Vibrionales Vibrionaceae <i>Vibrio cholerae</i> O1 biovar eltor str. N16961 |
| Vch-3-1 to Vch-3-2 | $\gamma$ -proteobacteria Vibrionales Vibrionaceae <i>Vibrio cholerae</i> O395                        |

Figure 1: Example of taxonomy of motif instances  
(See text for explanation.)

| abbrev                | RefSeq accession |   | 5' at   | 3' at   | genes                                                                           |
|-----------------------|------------------|---|---------|---------|---------------------------------------------------------------------------------|
| <sup>1</sup> Gme-1-13 | NC_007517.1      | + | 1911272 | 1911497 | RNA → possible cytochrome c →                                                   |
| <sup>2</sup> Gsu-1-6  | NC_002939.4      | - | 198072  | 197847  | RNA → RNA → LysM (cd00118) ErfK_YbiS_YhnG (pfam03734) → lipoprotein, putative → |

Figure 2: Example of part 1 of gene context diagrams  
(See text for explanation.)

homolog.

- Multiple sequence alignment of motif with a prediction of consensus structure.

## 1.1 Notes

Notes are numbered starting at 1. Notes indicate such cases as motif instances that may overlap putative ORFs, or have other features. Whenever the motif instance appears in the gene context or in the alignment, the superscript note number is given.

Example: note #1 for GEMM (see Page 6) reads “<sup>1</sup> The 5' side of a predicted rho-independent transcription terminator stem overlaps the 3' side of the P2 stem...” Motif instances in which predicted terminator stems overlap their P2 stem will be indicated with a superscript “1”.

## 1.2 Taxonomy and motif instance codes

The taxonomy of all motif instances is listed, and abbreviations are assigned to motif instances. An example is presented in Fig.1. In this example, several species in the genus *Vibrio* are shown. Motif instances are

abbreviated. For example, the *Vibrio angustum* instance is abbreviated “Van-1-1”. The abbreviation “Van” is derived from the species name.

Several species of *Vibrio cholerae* are given, each having two instances of the motif. In the last line, where the abbreviations are “Vch-3-1 to Vch-3-2”, the number “3” indicates that this is the third *Vibrio cholerae* strain listed. The two instances will be written as “Vch-3-1” and “Vch-3-2”.

Species names and taxonomy are extracted from RefSeq annotations.

## 1.3 Gene context

The gene context is divided into two parts: (1) a list of motif instances, with genome coordinates, and diagrams of neighboring genes, (2) descriptions of gene families into which these genes are assigned via the Conserved Domain Database.

### 1.3.1 Gene context: part 1

An example of part 1 is in Fig. 1.

The first line in the example labels the columns. The next line is an instance in *Geobacter metallireducens*. Its abbreviation is “Gme-1-13”. The

RefSeq accession number is given, as are nucleotide coordinates of the 5' and 3' ends of the sequence included in the alignment.

**Note:** we often include extra 3' sequence to show start codons and possible expression platforms; therefore the coordinates given may be larger than the putative conserved motif. Moreover, it is likely in those cases that the coordinates will contain sequence that is not part of the functional element.

If the RNA is on the minus strand, the 5' coordinate will be greater than the 3' one. The strand (plus or minus) is shown redundantly as “+” or “-”. The genes are shown next.

The putative motif instance is always shown using the word “RNA” with an arrow pointing in its direction. Genes forming a putative transcription unit are then shown. In this case, there is just one “possible cytochrome c” gene in the transcription unit. At the beginning of the line, the superscript “1” indicates that note #1 applies, so this has a predicted transcription terminator overlapping P2.

The third line in the example has a more complex gene context. The text “**RNA**→” is listed twice, indicating that there are tandem RNAs. Two genes (each with arrows pointing in the same direction as the RNA) appear in the putative transcriptional unit. The first gene, written as “LysM (cd00118) **ErfK\_YbiS\_YhmG (pfam03734)**→” has two domains, each of which were assigned to a different conserved domain (cd00118) and (pfam03734). Conserved domains that appear in more than one line of the gene context are given a color to help differentiate them from other domains. (However, there are a limited number of distinct colors, so sometimes the same color is assigned to more than one domain.)

Note: “hypo” = “hypothetical protein”. “hypo (cons)” = “conserved hypothetical protein”. Genes that were not assigned to a conserved domain are always colored gray. Due to limited genome annotation, genes from environmental sequences are typically of “unknown” type.

Motif instances are listed in an order that tends to put those with similar sequences together (which makes the alignment easier to analyze). The one exception is that GEMM RNAs are first grouped into broad taxa.

### 1.3.2 Gene context: part 2

The second part of the gene context describes each conserved domain that was associated with a gene instance. The descriptions are extracted from the Conserved Domain Database, but only the first part of the description is used. (The full descriptions are too long.) The conserved domains are sorted by code (e.g., “cdd00118” comes before “pfam03734”).

## 1.4 Multiple sequence alignment

The multiple sequence alignment of GEMM RNA begins on Page 21. The alignment principally consists of the nucleotides of each motif instance, with dots used to force corresponding nucleotides to line up. The top line says “alignment positions 1···160”; wide alignments are split into multiple blocks so that they fit on the page.

Each row is labeled with the abbreviation of the motif instance, e.g., “Sth-1-1”.

The nucleotides are then shown. At the bottom of each block of the alignment, alignment columns are annotated. The column annotations of GEMM start off like this:

```

.....<<..<<..<<..<<.....>>>
.....22...22...22.22.....222
.....R•R•YAAACY---•YG•RA---R••
                                  GNRA

```

The top line specifies which alignment columns typically base pair; matching angle brackets (“<” and “>”) indicate pairing. Different stems and different parts of stems are drawn in different colors to assist in matching up the angle brackets.

The second line shows which base-paired columns covary, etc. A period (“.”) is printed when the column is not base paired. A question mark (“?”) indicates that the pairing is either non-canonical or missing a nucleotide more than 5% of the time. (See Methods in the main paper.) Otherwise, “0” means the nucleotides in the pair are perfectly conserved (so, no evidence for or against covariation), “1” means that there is a compatible mutation and “2” means that there is a compensatory mutation.

The third line is the consensus nucleotide sequence, and is related to the consensus diagrams: the same red/black/gray letters are given for conserved nucleotides, while circles indicate nucleotides whose identity is

not conserved. The colors and meanings of letters and circles is the same as in the main paper. A gray dash (“-”) indicates that there is usually no nucleotide in that position, which is what happens when a column cannot be assigned a letter or circle. (Note: consensus diagram drawings differ from the alignment consensus sequence, because diagrams are drawn by hand to highlight conserved features and variations, whereas the consensus sequence is computed automatically.)

The last line of per-column annotation indicates where the GNRA tetraloop is. Abbreviations used in this line are as follows:

- **AUG** : predicted start codon.
- **SD+++** : predicted Shine-Dalgarno sequence (including columns annotated with the ‘+’ symbols). In all cases our annotated Shine-Dalgarno sequences are based on manual inspection, since these are rarely annotated in genome sequences.
- **w** : wobble positions. This is used for the ATPC motif, where we wish to show that the pattern of mutations after our re-annotated start codons is expected for a coding sequence.
- **T** : predicted start of transcription, using [11] in prokaryote mode.
- **GNRA** : GNRA tetraloop
- **5-TR** and **3TR** : 5’ and 3’ parts of GNRA tetraloop receptor

(The yellow nucleotides in GEMM RNA correspond to the stems of predicted transcription terminators, as described on Page 21.)

## 1.5 Notes on display of gene contexts and alignments

In alignments, RNAs within motifs that have exactly the same sequence as an existing member are not shown. RNAs with duplicate sequences are, however, shown in the gene context.

Except as noted, start codons were taken according to the annotation of the given genome in GenBank. Shine-Dalgarno sequences, being infrequently annotated, were estimated manually.

Gene information is automatically extracted from RefSeq genome annotations, and automatically assigned to Conserved Domain Database clusters. We have modified this data in the following contexts:

- Annotated genes that overlapped motifs are not shown in the gene context when we have reason to believe that either the gene is a false positive, or both RNA and gene are real and transcribed on opposite strands; these cases are always noted. We generally adopted the strategy of using BLAST to see if the putative gene is conserved, and assumed that unconserved genes are plausible false annotations. We acknowledge that BLAST may not find homologs with significant E-values when the query gene is very short, even if the gene is conserved.
- The Conserved Domain Database is comprised of models from COG, Pfam and the SMART database, as well as additional CDD-specific models. For many gene families, multiple source databases have essentially the same family, and genes associated with RNA motifs are arbitrarily assigned to one or the other. In these cases, we have chosen one model, and mapped all genes onto that. For example, in the case of the GEMM RNA motif, we mapped genes that were classified as pfam00672 (“HAMP domain”) to smart00304 (also “HAMP domain”), so that all predicted HAMP domains are shown under the same code.
- Similarly, gene names were unified. For example, in the case of SAH RNA, we changed “MTHFR” to the more standard “metF”; some genome annotations had used MTHFR, while others used metF.
- Gene names were also assigned based on the literature. We added the annotations of OmcA, OmcG, OmcH, OmcS and OmcT to GEMM-associated genes based on papers [8, 6].
- Transcriptional unit predictions are modified where there was evidence to do so.

For each motif, we decided what to show in the gene context. For motifs that strongly appear to be *cis*-regulatory elements, we show only the downstream operon. In some cases, we also show the first gene, if it

points the wrong way. For other non-*cis* motifs, we typically show the first 2 genes in either direction. Operons were inferred by adding genes to an operon until the next gene is on the opposite strand, or is more than 100 nucleotides beyond the previous gene. In some cases, we overrode these

predictions, either because genes in a putative operon were not conserved in related organisms, or based on literature. Our main goal in depicting the gene context is to help readers to identify possible patterns in the data, but our operon predictions must be viewed as rough.

## 2 Motif data and further analysis

### 2.1 The GEMM motif

#### 2.1.1 Additional analysis

Intriguingly, GEMM is present in several species that can reduce metal ions [7]: in addition to *Geobacter*, *Pelobacter* and the related *Desulfuromonas acetoxidans*, GEMM is found in *Syntrophobacter fumaroxidans*, *Rhodoferax ferrireducens*, *Desulfotomaculum reducens* and *Alkaliphilus metalliredigens*. However, clearly many unrelated bacteria also use GEMM RNA.

The GEMM RNA upstream of *omcS* is close to the gene's Shine-Dalgarno sequence and start codon. We had therefore hypothesized that this gene is controlled by sequestering of the SD sequence, and not at the transcriptional level. However, studies show that *OmcS* mRNAs are more abundant in certain conditions [5]. This transcriptional change may be a side effect of reduced translation, or arise from a parallel system of *OmcS* regulation.

GEMM RNA is frequently in front of two gene families that are poorly

understood, at least in bacteria:

- Fibronectin type III (in some cases, these genes have regions with BLAST homology to subtilase, E-value  $< 10^{-35}$ ; also sometimes homology to *cyd-5* cytochrome *c* family, E-value  $< 10^{-30}$ )
- ErfK/YbiS/YcfS/YnhG (often fused with lysin domain, a domain mentioned in the main paper [2])

*tfoX*<sup>GEMM</sup> expression is slightly increased (1.7-2.1 fold) by GlcNAc, but this was below the threshold used in the expression analysis [9].

GEMM RNA was not found upstream of cytochrome *c* genes in the genus *Pelobacter*, which is closely related to *Geobacter*. *P. carbinolicus* has only 14 predicted cytochrome *c* genes and no known homologs of *OmcG*, *OmcH* or *OmcS* [4].

#### 2.1.2 Genome context and alignment

Notes:

<sup>1</sup> The 5' side of a predicted rho-independent transcription terminator stem overlaps the 3' side of the P2 stem. If GEMM is a riboswitch, and its conserved structure forms when the ligand is present (as is the case for other riboswitches), we predict that this instance is an ON

switch, i.e., gene expression turns on when the ligand is present. In this case, the terminator was predicted by Rnall.

<sup>2</sup> The 5' side of a predicted rho-independent transcription terminator stem

overlaps the 3' side of the P2 stem. If GEMM is a riboswitch, and its conserved structure forms when the ligand is present (as is the case for other riboswitches), we predict that this instance is an ON switch, i.e., gene expression turns on when the ligand is present. In this case the terminator was predicted by manual inspection, and may have an unusually high number of base pairs or bulges in the stem.

<sup>3</sup> The putative Shine-Dalgarno sequence is very close to the conserved sequence on the 3' part of the GEMM motif. If GEMM is a riboswitch, and its conserved structure forms when the ligand is present (as is the case for other riboswitches), we predict that this is an OFF switch, whereby ligand binding causes the GEMM structure to block ribosomal binding. However, in all cases, we were unable to find homologs that conserved the 5'-most sequence, so it is possible that the start codon is merely annotated as earlier than the true start codon. On the other hand, we are encouraged by the COG1305-associated hits, which at least conserve the type of gene controlled. In all cases where GEMM RNA is upstream of COG1305, the COG1305 start codon overlaps the conserved part of the GEMM motif.

<sup>4</sup> The hypothetical ORF corresponding to the annotated start codon (which lacks a likely Shine-Dalgarno sequence) is not conserved in any bacteria.

<sup>5</sup> Overlaps gene on the opposite strand (NP\_866542.1). This gene is not conserved in any bacteria. However, it may be that both gene and RNA are genuinely on opposite strands. We find the homology of the RNA compelling.

<sup>6</sup> Homology is unclear.

<sup>7</sup> No genes are annotated nearby, probably because it is an environmental sequence fragment.

<sup>8</sup> No downstream gene is annotated because this homolog is near the end of a sequence fragment.

<sup>9</sup> No gene is annotated in this sequence (the RNA occurs roughly 2 Kb from one end of the sequence fragment). However, translated BLAST shows clear homology to a gene annotated as "Methyl-accepting chemotaxis protein" (E-value 1e-58), and other related genes.

<sup>10</sup> Overlaps extremely short ORF, but there is no evidence from BLAST that this ORF is conserved.

<sup>11</sup> The extremely long P2 loop in this putative homolog has no obvious low-energy fold. However, based on its other features, we think it reasonably likely that this is a true homolog.

<sup>12</sup> The homology here is borderline, in terms of extra insertions in P1, and mispairings in P2. However, there is substantial basis for hypothesizing homology, and the downstream gene is signalling-related, so a plausible one for this motif. Ultimately, given previous work with cell-cell communication in *Myxococcus*, we felt that failing to mention a plausible GEMM RNA would be unwise. We also note that this putative GEMM overlaps the 5'-end of the downstream gene, but this overlap region is not conserved in any bacteria.

<sup>13</sup> This RNA overlaps a putative ORF, but there is no evidence that this ORF is conserved in any bacteria.

<sup>14</sup> *omcG* is annotated as being  $\approx 180$  nucleotides from *omcH*, but the correct start codon is  $\approx 60$  upstream of the annotated one [6], so there is good reason to suspect that they are part of the same transcript.

<sup>15</sup> Coding sequence at annotated start codon is conserved; this is probably the correct start codon. However, Mfold shows no convincing stem that would sequester the putative Shine-Dalgarno sequence.

<sup>16</sup> Experimental and computational evidence suggest that OmcT is in the same operon as OmcS [8], so is shown here.

<sup>17</sup> This putative homolog overlaps the start codon of a gene (ZP\_01140822.1). However, this gene is not conserved in any bacteria.

- <sup>18</sup> Although the downstream gene is annotated as “hypothetical”, BLASTP finds strong homology to genes annotated as “type IV pilus assembly PilZ”.
- <sup>19</sup> This gene is 1.5 Kb from the nearest annotated gene. However, using translated BLAST, we find that the intervening region has strong (E-value=0) homology to putative chitin-binding protein genes.
- <sup>20</sup> Overlaps 5' region of downstream gene, but the overlapped part of the gene is not conserved in any bacteria, even though the gene as a whole is conserved.
- <sup>21</sup> Overlaps 5' region of downstream gene, but the entire downstream gene has no clear homologs in known bacteria, so it's unclear whether the overlap region is correct.
- <sup>22</sup> Overlaps  $\approx$  300 nucleotides of downstream gene, but the overlapped part of the gene is not conserved in any bacteria, although the gene as a whole is conserved.
- <sup>23</sup> An annotated start codon overlaps the putative transcription terminator, but (1) this start codon does not have an obvious Shine-Dalgarno, and (2) the 5' part of the predicted coding region is not conserved in any bacteria.
- <sup>24</sup> BLAST results support that the coding region is conserved from the annotated start codon, and therefore that the annotated start codon is correct.

#### abbrev. of hits

Sth-1-1 to Sth-1-1  
 Bha-1-1 to Bha-1-1  
 Bli-1-1 to Bli-1-2  
 Bsp-1-1 to Bsp-1-9  
 Ban-1-1 to Ban-1-1  
 Ban-2-1 to Ban-2-1  
 Ban-3-1 to Ban-3-1  
 Ban-4-1 to Ban-4-1  
 Ban-5-1 to Ban-5-1  
 Ban-6-1 to Ban-6-1  
 Ban-7-1 to Ban-7-1  
 Ban-8-1 to Ban-8-1  
 Ban-9-1 to Ban-9-1  
 Ban-10-1 to Ban-10-1  
 Bce-1-1 to Bce-1-1  
 Bce-2-1 to Bce-2-2  
 Bce-3-1 to Bce-3-1  
 Bce-4-1 to Bce-4-3  
 Bce-5-1 to Bce-5-1  
 Bth-1-1 to Bth-1-5  
 Bth-2-1 to Bth-2-1  
 Bwe-1-1 to Bwe-1-2  
 Oih-1-1 to Oih-1-1  
 Ame-1-1 to Ame-1-11  
 Cbe-1-1 to Cbe-1-4  
 Cdi-1-1 to Cdi-1-8  
 Cpe-1-1 to Cpe-1-2  
 Cpe-2-1 to Cpe-2-1  
 Cpe-3-1 to Cpe-3-1  
 Cph-1-1 to Cph-1-2  
 Csp-1-1 to Csp-1-1  
 Cte-1-1 to Cte-1-1

#### taxonomy of species

Actinobacteria *Symbiobacterium thermophilum* IAM 14863  
 Firmicutes Bacillales Bacillaceae *Bacillus halodurans* C-125  
 Firmicutes Bacillales Bacillaceae *Bacillus licheniformis* ATCC 14580 (DSM 13)  
 Firmicutes Bacillales Bacillaceae *Bacillus sp.* NRRL B-14911  
 Firmicutes Bacillales Bacillaceae Bacillus Bacilluscereus group *Bacillus anthracis str.* 'Ames Ancestor'  
 Firmicutes Bacillales Bacillaceae Bacillus Bacilluscereus group *Bacillus anthracis str.* A1055  
 Firmicutes Bacillales Bacillaceae Bacillus Bacilluscereus group *Bacillus anthracis str.* A2012  
 Firmicutes Bacillales Bacillaceae Bacillus Bacilluscereus group *Bacillus anthracis str.* Ames  
 Firmicutes Bacillales Bacillaceae Bacillus Bacilluscereus group *Bacillus anthracis str.* Australia 94  
 Firmicutes Bacillales Bacillaceae Bacillus Bacilluscereus group *Bacillus anthracis str.* CNEVA-9066  
 Firmicutes Bacillales Bacillaceae Bacillus Bacilluscereus group *Bacillus anthracis str.* Kruger B  
 Firmicutes Bacillales Bacillaceae Bacillus Bacilluscereus group *Bacillus anthracis str.* Sterne  
 Firmicutes Bacillales Bacillaceae Bacillus Bacilluscereus group *Bacillus anthracis str.* Vollum  
 Firmicutes Bacillales Bacillaceae Bacillus Bacilluscereus group *Bacillus anthracis str.* Western North America USA6153  
 Firmicutes Bacillales Bacillaceae Bacillus Bacilluscereus group *Bacillus cereus* ATCC 10987  
 Firmicutes Bacillales Bacillaceae Bacillus Bacilluscereus group *Bacillus cereus* ATCC 14579  
 Firmicutes Bacillales Bacillaceae Bacillus Bacilluscereus group *Bacillus cereus* E33L  
 Firmicutes Bacillales Bacillaceae Bacillus Bacilluscereus group *Bacillus cereus* G9241  
 Firmicutes Bacillales Bacillaceae Bacillus Bacilluscereus group *Bacillus cereus subsp. cytotoxis* NVH 391-98  
 Firmicutes Bacillales Bacillaceae Bacillus Bacilluscereus group *Bacillus thuringiensis serovar israelensis* ATCC 35646  
 Firmicutes Bacillales Bacillaceae Bacillus Bacilluscereus group *Bacillus thuringiensis serovar konkukian str.* 97-27  
 Firmicutes Bacillales Bacillaceae Bacillus Bacilluscereus group *Bacillus weihenstephanensis* KBAB4  
 Firmicutes Bacillales Bacillaceae *Oceanobacillus iheyensis* HTE831  
 Firmicutes Clostridia Clostridiales Clostridiaceae *Alkaliphilus metalliredigenes* QYMF  
 Firmicutes Clostridia Clostridiales Clostridiaceae *Clostridium beijerincki* NCIMB 8052  
 Firmicutes Clostridia Clostridiales Clostridiaceae *Clostridium difficile* QCD-32g58  
 Firmicutes Clostridia Clostridiales Clostridiaceae *Clostridium perfringens* ATCC 13124  
 Firmicutes Clostridia Clostridiales Clostridiaceae *Clostridium perfringens* SM101  
 Firmicutes Clostridia Clostridiales Clostridiaceae *Clostridium perfringens str.* 13  
 Firmicutes Clostridia Clostridiales Clostridiaceae *Clostridium phytofermentans* ISDg  
 Firmicutes Clostridia Clostridiales Clostridiaceae *Clostridium sp.* OhILAs  
 Firmicutes Clostridia Clostridiales Clostridiaceae *Clostridium tetani* E88



Cth-1-1 to Cth-1-4 Firmicutes Clostridia Clostridiales Clostridiaceae *Clostridium thermocellum* ATCC 27405  
 Chy-1-1 to Chy-1-7 Firmicutes Clostridia Clostridiales Peptococcaceae *Carboxydotherrmus hydrogenoformans* Z-2901  
 Dha-1-1 to Dha-1-5 Firmicutes Clostridia Clostridiales Peptococcaceae *Desulfotobacterium hafniense* DCB-2  
 Dha-2-1 to Dha-2-6 Firmicutes Clostridia Clostridiales Peptococcaceae *Desulfotobacterium hafniense* Y51  
 Dre-1-1 to Dre-1-6 Firmicutes Clostridia Clostridiales Peptococcaceae *Desulfotomaculum reducens* MI-1  
 Csa-1-1 to Csa-1-4 Firmicutes Clostridia Clostridiales Syntrophomonadaceae *Caldicellulosiruptor saccharolyticus* DSM 8903  
 Hor-1-1 to Hor-1-2 Firmicutes Clostridia Halanaerobiales Halanaerobiaceae *Halothermothrix orenii* H 168  
 Mth-1-1 to Mth-1-7 Firmicutes Clostridia Thermoanaerobacteriales Thermoanaerobacteriaceae Moorella group *Moorella thermoacetica* ATCC 39073  
 Tet-1-1 to Tet-1-1 Firmicutes Clostridia Thermoanaerobacteriales Thermoanaerobacteriaceae *Thermoanaerobacter ethanolicus* ATCC 33223  
 Tte-1-1 to Tte-1-1 Firmicutes Clostridia Thermoanaerobacteriales Thermoanaerobacteriaceae *Thermoanaerobacter tengcongensis* MB4  
 Bma-1-1 to Bma-1-1 Planctomycetes Planctomycetacia Planctomycetales Planctomycetaceae *Blastopirellula marina* DSM 3645  
 Rba-1-1 to Rba-1-1 Planctomycetes Planctomycetacia Planctomycetales Planctomycetaceae *Rhodopirellula baltica* SH 1  
 Rso-1-1 to Rso-1-1  $\beta$ -proteobacteria Burkholderiales Burkholderiaceae *Ralstonia solanacearum* UW551  
 Rfe-1-1 to Rfe-1-1  $\beta$ -proteobacteria Burkholderiales Comamonadaceae *Rhodoferax ferrireducens* T118  
 Tde-1-1 to Tde-1-1  $\beta$ -proteobacteria Hydrogenophilales Hydrogenophilaceae *Thiobacillus denitrificans* ATCC 25259  
 Mfl-1-1 to Mfl-1-1  $\beta$ -proteobacteria Methylophilales Methylophilaceae *Methylobacillus flagellatus* KT  
 Neu-1-1 to Neu-1-1  $\beta$ -proteobacteria Nitrosomonadales Nitrosomonadaceae *Nitrosomonas europaea* ATCC 19718  
 Neu-2-1 to Neu-2-1  $\beta$ -proteobacteria Nitrosomonadales Nitrosomonadaceae *Nitrosomonas eutropha* C71  
 Nmu-1-1 to Nmu-1-3  $\beta$ -proteobacteria Nitrosomonadales Nitrosomonadaceae *Nitrospira multififormis* ATCC 25196  
 Asp-1-1 to Asp-1-1  $\beta$ -proteobacteria Rhodocyclales Rhodocyclaceae *Azoarcus* sp. EbN1  
 Bba-1-1 to Bba-1-1  $\delta$ -proteobacteria Bdellovibrionales Bdellovibrionaceae *Bdellovibrio bacteriovorus* HD100  
 Dde-1-1 to Dde-1-1  $\delta$ -proteobacteria Desulfovibrionales Desulfovibrionaceae *Desulfovibrio desulfuricans* G20  
 Dac-1-1 to Dac-1-2  $\delta$ -proteobacteria Desulfuromonadales Desulfuromonadaceae *Desulfuromonas acetoxidans* DSM 684  
 Gme-1-1 to Gme-1-19  $\delta$ -proteobacteria Desulfuromonadales Geobacteraceae *Geobacter metallireducens* GS-15  
 Gsp-1-1 to Gsp-1-7  $\delta$ -proteobacteria Desulfuromonadales Geobacteraceae *Geobacter* sp. FRC-32  
 Gsu-1-1 to Gsu-1-17  $\delta$ -proteobacteria Desulfuromonadales Geobacteraceae *Geobacter sulfurreducens* PCA  
 Gur-1-1 to Gur-1-30  $\delta$ -proteobacteria Desulfuromonadales Geobacteraceae *Geobacter uraniumreducens* Rf4  
 Pca-1-1 to Pca-1-9  $\delta$ -proteobacteria Desulfuromonadales Pelobacteraceae *Pelobacter carbinolicus* DSM 2380  
 Ppr-1-1 to Ppr-1-17  $\delta$ -proteobacteria Desulfuromonadales Pelobacteraceae *Pelobacter propionicus* DSM 2379  
 Ade-1-1 to Ade-1-1  $\delta$ -proteobacteria Myxococcales Cystobacterineae Myxococcaceae *Anaeromyxobacter dehalogenans* 2CP-C  
 Mxa-1-1 to Mxa-1-1  $\delta$ -proteobacteria Myxococcales Cystobacterineae Myxococcaceae *Myxococcus xanthus* DK 1622  
 Sfu-1-1 to Sfu-1-7  $\delta$ -proteobacteria Syntrophobacteriales Syntrophobacteraceae *Syntrophobacter fumaroxidans* MPOB  
 Sde-1-1 to Sde-1-2  $\gamma$ -proteobacteria Alteromonadales Alteromonadaceae *Saccharophagus degradans* 2-40  
 Cps-1-1 to Cps-1-3  $\gamma$ -proteobacteria Alteromonadales Colwelliaceae *Colwellia psychrerythraea* 34H  
 Iba-1-1 to Iba-1-2  $\gamma$ -proteobacteria Alteromonadales Idiomarinaceae *Idiomarina baltica* OS145  
 Ptu-1-1 to Ptu-1-3  $\gamma$ -proteobacteria Alteromonadales Pseudoalteromonadaceae *Pseudoalteromonas tunicata* D2  
 Pin-1-1 to Pin-1-5  $\gamma$ -proteobacteria Alteromonadales Psychromonadaceae *Psychromonas ingrahamii* 37  
 Sba-1-1 to Sba-1-2  $\gamma$ -proteobacteria Alteromonadales Shewanellaceae *Shewanella baltica* OS155  
 Sba-2-1 to Sba-2-2  $\gamma$ -proteobacteria Alteromonadales Shewanellaceae *Shewanella baltica* OS195  
 Sde-2-1 to Sde-2-1  $\gamma$ -proteobacteria Alteromonadales Shewanellaceae *Shewanella denitrificans* OS217  
 Son-1-1 to Son-1-1  $\gamma$ -proteobacteria Alteromonadales Shewanellaceae *Shewanella oneidensis* MR-1  
 Ssp-1-1 to Ssp-1-2  $\gamma$ -proteobacteria Alteromonadales Shewanellaceae *Shewanella* sp. ANA-3  
 Ssp-2-1 to Ssp-2-6  $\gamma$ -proteobacteria Alteromonadales Shewanellaceae *Shewanella* sp. MR-4  
 Ssp-3-1 to Ssp-3-3  $\gamma$ -proteobacteria Alteromonadales Shewanellaceae *Shewanella* sp. MR-7  
 Ssp-4-1 to Ssp-4-1  $\gamma$ -proteobacteria Alteromonadales Shewanellaceae *Shewanella* sp. PV-4  
 Ssp-5-1 to Ssp-5-1  $\gamma$ -proteobacteria Alteromonadales Shewanellaceae *Shewanella* sp. W3-18-1  
 Osp-1-1 to Osp-1-3  $\gamma$ -proteobacteria Oceanospirillales *Oceanospirillum* sp. MED92  
 Tcr-1-1 to Tcr-1-4  $\gamma$ -proteobacteria Thiotrichales Piscirickettsiaceae *Thiomicrospira crunogena* XCL-2  
 Ppr-2-1 to Ppr-2-3  $\gamma$ -proteobacteria Vibrionales Vibrionaceae *Photobacterium profundum* 3TCK  
 Ppr-3-1 to Ppr-3-3  $\gamma$ -proteobacteria Vibrionales Vibrionaceae *Photobacterium profundum* SS9  
 Psp-1-1 to Psp-1-1  $\gamma$ -proteobacteria Vibrionales Vibrionaceae *Photobacterium* sp. SKA34  
 Val-1-1 to Val-1-2  $\gamma$ -proteobacteria Vibrionales Vibrionaceae *Vibrio alginolyticus* 12G01  
 Van-1-1 to Van-1-1  $\gamma$ -proteobacteria Vibrionales Vibrionaceae *Vibrio angustum* S14  
 Vch-1-1 to Vch-1-2  $\gamma$ -proteobacteria Vibrionales Vibrionaceae *Vibrio cholerae* MO10

|                    |                          |             |              |                                                    |
|--------------------|--------------------------|-------------|--------------|----------------------------------------------------|
| Vch-2-1 to Vch-2-2 | $\gamma$ -proteobacteria | Vibrionales | Vibrionaceae | <i>Vibrio cholerae</i> O1 biovar eltor str. N16961 |
| Vch-3-1 to Vch-3-2 | $\gamma$ -proteobacteria | Vibrionales | Vibrionaceae | <i>Vibrio cholerae</i> O395                        |
| Vch-4-1 to Vch-4-1 | $\gamma$ -proteobacteria | Vibrionales | Vibrionaceae | <i>Vibrio cholerae</i> RC385                       |
| Vch-5-1 to Vch-5-2 | $\gamma$ -proteobacteria | Vibrionales | Vibrionaceae | <i>Vibrio cholerae</i> V51                         |
| Vch-6-1 to Vch-6-2 | $\gamma$ -proteobacteria | Vibrionales | Vibrionaceae | <i>Vibrio cholerae</i> V52                         |
| Vfi-1-1 to Vfi-1-1 | $\gamma$ -proteobacteria | Vibrionales | Vibrionaceae | <i>Vibrio fischeri</i> ES114                       |
| Vpa-1-1 to Vpa-1-2 | $\gamma$ -proteobacteria | Vibrionales | Vibrionaceae | <i>Vibrio parahaemolyticus</i> RIMD 2210633        |
| Vsp-1-1 to Vsp-1-1 | $\gamma$ -proteobacteria | Vibrionales | Vibrionaceae | <i>Vibrio</i> sp. Ex25                             |
| Vsp-2-1 to Vsp-2-1 | $\gamma$ -proteobacteria | Vibrionales | Vibrionaceae | <i>Vibrio</i> sp. MED222                           |
| Vsp-3-1 to Vsp-3-2 | $\gamma$ -proteobacteria | Vibrionales | Vibrionaceae | <i>Vibrio splendidus</i> 12B01                     |
| Vvu-1-1 to Vvu-1-2 | $\gamma$ -proteobacteria | Vibrionales | Vibrionaceae | <i>Vibrio vulnificus</i> CMCP6                     |
| Vvu-2-1 to Vvu-2-2 | $\gamma$ -proteobacteria | Vibrionales | Vibrionaceae | <i>Vibrio vulnificus</i> YJ016                     |
| env-1 to env-11    |                          |             |              | environmental samples                              |

| abbrev                | RefSeq accession  |   | 5' at   | 3' at   | genes                                                                                                                                                                                                                                                       |
|-----------------------|-------------------|---|---------|---------|-------------------------------------------------------------------------------------------------------------------------------------------------------------------------------------------------------------------------------------------------------------|
| Actinobacteria        |                   |   |         |         |                                                                                                                                                                                                                                                             |
| Sth-1-1               | NC_006177.1       | - | 3227495 | 3227236 | RNA → FliM (COG1868) → COG1406 (COG1406) → FlgG (COG4786) → FlgB (COG1815) → FlgC (COG1558) → FliE (COG1677) → FliF (COG1766) → FliG (COG1536) → flagellar assembly protein → FliI (COG1157) → flagellar basal-body protein → hypo → Flg_hook (pfam02120) → |
| Firmicutes Bacillales |                   |   |         |         |                                                                                                                                                                                                                                                             |
| Bsp-1-1               | NZ_AAOX01000005.1 | + | 210212  | 210443  | RNA → AtoS (COG2202) RocR (COG3829) COG5001 (COG5001) →                                                                                                                                                                                                     |
| Bce-5-1               | NZ_AALL01000002.1 | - | 59384   | 59148   | RNA → HAMP (smart00304) MA (COG0840) → EntF (COG1020) COG3320 (COG3320) PP-binding (pfam00550) →                                                                                                                                                            |
| Bce-1-1               | NC_003909.8       | + | 504284  | 504517  | RNA → HAMP (smart00304) MA (COG0840) →                                                                                                                                                                                                                      |
| Bce-4-1               | NZ_AAEK01000015.1 | - | 90981   | 90748   | RNA → HAMP (smart00304) MA (COG0840) →                                                                                                                                                                                                                      |
| Bth-2-1               | NC_005957.1       | + | 421273  | 421506  | RNA → HAMP (smart00304) MA (COG0840) →                                                                                                                                                                                                                      |
| Ban-4-1               | NC_003997.3       | + | 397292  | 397525  | RNA → HAMP (smart00304) MA (COG0840) →                                                                                                                                                                                                                      |
| Ban-8-1               | NC_005945.1       | + | 397305  | 397538  | RNA → HAMP (smart00304) MA (COG0840) →                                                                                                                                                                                                                      |
| Ban-1-1               | NC_007530.2       | + | 397292  | 397525  | RNA → HAMP (smart00304) MA (COG0840) →                                                                                                                                                                                                                      |
| Ban-3-1               | NZ_AAAC02000001.1 | + | 914180  | 914413  | RNA → HAMP (smart00304) MA (COG0840) →                                                                                                                                                                                                                      |
| Ban-6-1               | NZ_AAEN01000023.1 | + | 138415  | 138648  | RNA →                                                                                                                                                                                                                                                       |
| Ban-2-1               | NZ_AAEO01000030.1 | + | 151854  | 152087  | RNA →                                                                                                                                                                                                                                                       |
| Ban-9-1               | NZ_AAEP01000046.1 | + | 103744  | 103977  | RNA →                                                                                                                                                                                                                                                       |
| Ban-7-1               | NZ_AAEQ01000043.1 | - | 90673   | 90440   | RNA →                                                                                                                                                                                                                                                       |
| Ban-10-1              | NZ_AAER01000042.1 | - | 136402  | 136169  | RNA →                                                                                                                                                                                                                                                       |
| Ban-5-1               | NZ_AAES01000043.1 | + | 103414  | 103647  | RNA →                                                                                                                                                                                                                                                       |
| Bce-3-1               | NC_006274.1       | + | 414665  | 414898  | RNA → HAMP (smart00304) MA (COG0840) →                                                                                                                                                                                                                      |
| Bce-2-1               | NC_004722.1       | + | 408156  | 408389  | RNA → HAMP (smart00304) MA (COG0840) →                                                                                                                                                                                                                      |
| Bth-1-1               | NZ_AAJM01000023.1 | + | 10970   | 11203   | RNA → HAMP (smart00304) MA (COG0840) → EntF (COG1020) COG3320 (COG3320) PP-binding (pfam00550) →                                                                                                                                                            |
| Bwe-1-1               | NZ_AAOY01000004.1 | - | 100864  | 100631  | RNA → HAMP (smart00304) MA (COG0840) →                                                                                                                                                                                                                      |
| Bsp-1-2               | NZ_AAOX01000005.1 | - | 65987   | 65754   | RNA → GGDEF (cd01949) PAC (pfam00785) → DmpA (COG3191) →                                                                                                                                                                                                    |
| <sup>1</sup> Bce-2-2  | NC_004722.1       | + | 1036786 | 1037027 | RNA → COG4932 (COG4932) Cna_B (pfam05738) →                                                                                                                                                                                                                 |
| <sup>1</sup> Bth-1-2  | NZ_AAJM01000012.1 | - | 18087   | 17846   | RNA → COG4932 (COG4932) Cna_B (pfam05738) →                                                                                                                                                                                                                 |

|                       |                   |   |         |         |                                                                                                                                                                                            |
|-----------------------|-------------------|---|---------|---------|--------------------------------------------------------------------------------------------------------------------------------------------------------------------------------------------|
| <sup>1</sup> Bwe-1-2  | NZ_AA0Y01000011.1 | + | 28331   | 28570   | RNA → Collagen_bind (pfam05737)Cna_B (pfam05738) →                                                                                                                                         |
| <sup>2</sup> Bth-1-5  | NZ_AAJM01000107.1 | - | 5968    | 5731    | RNA → RNA → RNA → Cell surface protein → Cell surface protein → Hypothetical exported protein →<br>Hypothetical exported protein →                                                         |
| <sup>2</sup> Bth-1-4  | NZ_AAJM01000107.1 | - | 5811    | 5574    | (shown above)                                                                                                                                                                              |
| <sup>2</sup> Bth-1-3  | NZ_AAJM01000107.1 | - | 5655    | 5418    | (shown above)                                                                                                                                                                              |
| <sup>2</sup> Bce-4-3  | NZ_AAEK01000003.1 | - | 195343  | 195105  | RNA → RNA → hypothetical protein protein → cell wall surface anchor family protein →<br>conserved hypothetical protein protein → conserved hypothetical protein protein →<br>(shown above) |
| <sup>2</sup> Bce-4-2  | NZ_AAEK01000003.1 | - | 195166  | 194929  | (shown above)                                                                                                                                                                              |
| Bsp-1-3               | NZ_AAOX01000001.1 | + | 400824  | 401055  | RNA → hypo →                                                                                                                                                                               |
| Bsp-1-4               | NZ_AAOX01000001.1 | + | 401431  | 401666  | RNA → hypo →                                                                                                                                                                               |
| Oih-1-1               | NC_004193.1       | - | 2580327 | 2580094 | RNA → HTH_XRE (cd00093) →                                                                                                                                                                  |
| Bsp-1-5               | NZ_AAOX01000001.1 | + | 434573  | 434807  | RNA → ←LytR (COG1316)                                                                                                                                                                      |
| <sup>21</sup> Bsp-1-6 | NZ_AAOX01000001.1 | + | 422555  | 422791  | RNA → hypo →                                                                                                                                                                               |
| Bli-1-1               | NC_006270.2       | + | 378603  | 378838  | RNA → EntF (COG1020)PP-binding (pfam00550)Condensation (pfam00668) →                                                                                                                       |
| Bli-1-2               | NC_006322.1       | + | 378413  | 378648  | RNA → EntF (COG1020)PP-binding (pfam00550)Condensation (pfam00668) →                                                                                                                       |
| Bsp-1-7               | NZ_AAOX01000007.1 | - | 21294   | 21058   | RNA → hypo →                                                                                                                                                                               |
| <sup>20</sup> Bsp-1-8 | NZ_AAOX01000025.1 | - | 55956   | 55723   | RNA → amidase →                                                                                                                                                                            |
| Bha-1-1               | NC_002570.2       | + | 597582  | 597816  | RNA → hypo → hypo → MA (COG0840) →                                                                                                                                                         |
| Bsp-1-9               | NZ_AAOX01000005.1 | - | 221613  | 221358  | RNA → hypo →                                                                                                                                                                               |

#### Firmicutes Clostridia

|                      |                   |   |         |         |                                                                             |
|----------------------|-------------------|---|---------|---------|-----------------------------------------------------------------------------|
| Tet-1-1              | NZ_AAKQ01000003.1 | - | 58667   | 58431   | RNA → hypo →                                                                |
| Tte-1-1              | NC_003869.1       | + | 706140  | 706376  | RNA → CheW (COG0835) → HD (pfam01966) →                                     |
| Mth-1-1              | NC_007644.1       | + | 774359  | 774594  | RNA → Tar (COG0840) →                                                       |
| Mth-1-2              | NC_007644.1       | + | 543022  | 543258  | RNA → Copper amine oxidase-like →                                           |
| <sup>1</sup> Mth-1-3 | NC_007644.1       | - | 1536251 | 1536015 | RNA → Cache (pfam02743)Tar (COG0840) →                                      |
| Mth-1-4              | NC_007644.1       | - | 1595675 | 1595443 | RNA → PufF (COG1459) →                                                      |
| Mth-1-5              | NC_007644.1       | + | 394734  | 394968  | RNA → HATPase_c (pfam02518) → Transposase_8 (pfam01527) → rve (pfam00665) → |
| Mth-1-6              | NC_007644.1       | - | 2598937 | 2598700 | RNA → COG2206 (COG2206) →                                                   |
| <sup>1</sup> Mth-1-7 | NC_007644.1       | + | 805514  | 805760  | RNA → FlgB (COG1815) → FlgC (COG1558) →                                     |
| Hor-1-2              | NZ_AAOZ01000009.1 | + | 24934   | 25185   | RNA → RNA → hypo →                                                          |
| <sup>3</sup> Hor-1-1 | NZ_AAOZ01000009.1 | + | 25095   | 25337   | (shown above)                                                               |

#### Firmicutes Clostridia Clostridiales

|                      |                   |   |         |         |                                                                                                                                                                                                                                          |
|----------------------|-------------------|---|---------|---------|------------------------------------------------------------------------------------------------------------------------------------------------------------------------------------------------------------------------------------------|
| <sup>3</sup> Cph-1-1 | NZ_AAQT01000008.1 | - | 50840   | 50604   | RNA → COG1305 (COG1305) →                                                                                                                                                                                                                |
| Cdi-1-1              | NZ_AAML02000042.1 | - | 9725    | 9483    | RNA → hypo →                                                                                                                                                                                                                             |
| Cpe-3-1              | NC_003366.1       | - | 1510292 | 1510060 | RNA → hypo →                                                                                                                                                                                                                             |
| Cpe-1-1              | NC_008261.1       | - | 1695696 | 1695464 | RNA → F5/8 type C domain protein →                                                                                                                                                                                                       |
| Cpe-2-1              | NC_008262.1       | - | 1445209 | 1444977 | RNA → Leucine Rich Repeat domain protein →                                                                                                                                                                                               |
| Cdi-1-2              | NZ_AAML02000007.1 | + | 159539  | 159778  | RNA → FlgB (COG1815) → FlgC (COG1558) → FliE (COG1677) → FliF (COG1766) → FliG (COG1536) →<br>FliH (COG1317) → FliI (COG1157) → hypo → Flg_hook (pfam02120) → FlgD (pfam03963) → FlgG (COG4786) →<br>FlbD (pfam06289) → MotA (COG1291) → |
| Cdi-1-3              | NZ_AAML02000041.1 | + | 5723    | 5961    | RNA → hypo →                                                                                                                                                                                                                             |
| Cdi-1-4              | NZ_AAML02000042.1 | + | 10693   | 10939   | RNA → hypo →                                                                                                                                                                                                                             |

|                       |                    |   |         |         |                                                                                                                                                                                                                                                                                 |
|-----------------------|--------------------|---|---------|---------|---------------------------------------------------------------------------------------------------------------------------------------------------------------------------------------------------------------------------------------------------------------------------------|
| Cdi-1-5               | NZ_AAAML02000047.1 | + | 1065    | 1303    | RNA → hypo →                                                                                                                                                                                                                                                                    |
| Cdi-1-6               | NZ_AAAML02000055.1 | - | 108482  | 108248  | RNA → hypo →                                                                                                                                                                                                                                                                    |
| Cdi-1-7               | NZ_AAAML02000057.1 | - | 5330    | 5096    | RNA → hypo →                                                                                                                                                                                                                                                                    |
| Cpe-1-2               | NC_008261.1        | + | 1218268 | 1218504 | RNA → discoidin domain protein →                                                                                                                                                                                                                                                |
| Cth-1-1               | NZ_AABG04000032.1  | + | 32829   | 33061   | RNA → hypo →                                                                                                                                                                                                                                                                    |
| <sup>3</sup> Cte-1-1  | NC_004557.1        | + | 477013  | 477237  | RNA → <b>FGc (COG1305)</b> →                                                                                                                                                                                                                                                    |
| Ame-1-1               | NZ_AAKU01000077.1  | + | 12384   | 12618   | RNA → <b>Far (COG0840)</b> Cache (pfam02743) →                                                                                                                                                                                                                                  |
| <sup>13</sup> Chy-1-1 | NC_007503.1        | + | 777679  | 777912  | RNA → hypo →                                                                                                                                                                                                                                                                    |
| Chy-1-2               | NC_007503.1        | + | 785822  | 786055  | RNA → <b>MA (COG0840)</b> → Tautomerase (pfam01361) → hypo → BioB (COG0502) →                                                                                                                                                                                                   |
| Chy-1-3               | NC_007503.1        | + | 851296  | 851533  | RNA → <b>COG2206 (COG2206)</b> → <b>MotA (COG1291)</b> → <b>MotB (COG1360)</b> → <b>Far (COG0840)</b> → <b>CheW (COG0835)</b> → <b>CheA (COG0643)</b> → <b>CheB (COG2201)</b> → negative regulator of flagellin synthesis FlgM → hypo → FlgK (COG1256)DUF1078 (pfam06429) →     |
| Chy-1-4               | NC_007503.1        | + | 900392  | 900625  | RNA → <b>COG1315 (COG1315)</b> → DUF517 (pfam04460) → <b>Far (COG0840)</b> Cache (pfam02743) →                                                                                                                                                                                  |
| <sup>13</sup> Chy-1-5 | NC_007503.1        | + | 875560  | 875795  | RNA → <b>FlgB (COG1815)</b> → <b>FlgC (COG1558)</b> → <b>FlhE (COG1677)</b> → <b>FlhF (COG1766)</b> → <b>FlhG (COG1536)</b> → flagellar protein → <b>FlhI (COG1157)</b> → flagellar protein → hypo → <b>FlgD (COG1843)</b> → flagellar operon protein → <b>FlgG (COG4786)</b> → |
| Chy-1-6               | NC_007503.1        | - | 90445   | 90210   | RNA → <b>COG2206 (COG2206)</b> → Nonheme_Ferritin (cd01055) →                                                                                                                                                                                                                   |
| Chy-1-7               | NC_007503.1        | + | 906921  | 907153  | RNA → <b>COG1413 (COG1413)</b> → MeTrc (smart00138) → <b>MA (COG0840)</b> → <b>CheW (COG0835)</b> <b>CheW (COG0835)</b> → <b>CheB (COG2201)</b> → <b>REC (cd00156)</b> → <b>CheA (COG0643)</b> Hpt (pfam01627) → hypo →                                                         |
| Cbe-1-1               | NZ_AALO01000004.1  | + | 136897  | 137136  | RNA → <b>WbbJ (COG0110)</b> → <b>Cache (pfam02743)</b> <b>Far (COG0840)</b> →                                                                                                                                                                                                   |
| Cbe-1-2               | NZ_AALO01000002.1  | + | 236750  | 236987  | RNA → <b>MotA (COG1291)</b> → <b>MotB (COG1360)</b> →                                                                                                                                                                                                                           |
| Cbe-1-3               | NZ_AALO01000001.1  | + | 198488  | 198724  | RNA → hypo → KAS_III (cd00830) →                                                                                                                                                                                                                                                |
| Cph-1-2               | NZ_AAQT01000020.1  | - | 55929   | 55692   | RNA → <b>PAS (cd00130)</b> EAL (cd01948) <b>CGDEF (cd01949)</b> HAMP (smart00304) →                                                                                                                                                                                             |
| Ame-1-2               | NZ_AAKU01000027.1  | - | 37722   | 37484   | RNA → <b>HAMP (smart00304)</b> <b>MA (COG0840)</b> →                                                                                                                                                                                                                            |
| Ame-1-3               | NZ_AAKU01000041.1  | - | 3355    | 3117    | RNA → <b>MA (COG0840)</b> →                                                                                                                                                                                                                                                     |
| Ame-1-4               | NZ_AAKU01000109.1  | - | 8750    | 8512    | RNA → <b>MA (COG0840)</b> →                                                                                                                                                                                                                                                     |
| Ame-1-5               | NZ_AAKU01000048.1  | - | 2875    | 2638    | RNA → <b>NTP_transf_2 (pfam01909)</b> → HEPN (smart00748) →                                                                                                                                                                                                                     |
| Ame-1-6               | NZ_AAKU01000072.1  | + | 19443   | 19680   | RNA → <b>Far (COG0840)</b> Cache (pfam02743) →                                                                                                                                                                                                                                  |
| Ame-1-7               | NZ_AAKU01000018.1  | - | 30739   | 30501   | RNA → <b>Far (COG0840)</b> →                                                                                                                                                                                                                                                    |
| Dha-2-1               | NC_007907.1        | + | 4879337 | 4879573 | RNA → <b>COG2206 (COG2206)</b> →                                                                                                                                                                                                                                                |
| Dha-1-1               | NZ_AAAW04000004.1  | + | 324653  | 324889  | RNA → <b>COG2206 (COG2206)</b> →                                                                                                                                                                                                                                                |
| Csa-1-1               | NZ_AALW01000029.1  | + | 1770    | 2008    | RNA → <b>Glyco_hydro_9 (pfam00759)</b> CBM_3 (pfam00942)Glyco_hydro_48 (pfam02011) →                                                                                                                                                                                            |
| Csa-1-2               | NZ_AALW01000025.1  | - | 10447   | 10209   | RNA → hypo →                                                                                                                                                                                                                                                                    |
| Dre-1-1               | NZ_AAOP01000011.1  | + | 80934   | 81165   | RNA → <b>REC (cd00156)</b> →                                                                                                                                                                                                                                                    |
| Dha-2-2               | NC_007907.1        | - | 15633   | 15395   | RNA → ← hypo                                                                                                                                                                                                                                                                    |
| Dha-1-2               | NZ_AAAW04000002.1  | - | 132552  | 132315  | RNA → <b>RpoE (COG1595)</b> →                                                                                                                                                                                                                                                   |
| Dha-1-3               | NZ_AAAW04000002.1  | - | 149642  | 149405  | RNA → ← <b>BacS (COG0642)</b>                                                                                                                                                                                                                                                   |
| Dha-2-3               | NC_007907.1        | + | 5437254 | 5437487 | RNA → <b>HAMP (smart00304)</b> Cache (pfam02743) <b>MA (COG0840)</b> →                                                                                                                                                                                                          |
| Dha-1-4               | NZ_AAAW04000003.1  | - | 899692  | 899459  | RNA → <b>HAMP (smart00304)</b> Cache (pfam02743) <b>MA (COG0840)</b> →                                                                                                                                                                                                          |
| Csa-1-3               | NZ_AALW01000051.1  | + | 6424    | 6669    | RNA → hypo →                                                                                                                                                                                                                                                                    |
| Csa-1-4               | NZ_AALW01000072.1  | + | 611     | 859     | RNA → <b>COG2206 (COG2206)</b> → <b>CheA (COG0643)</b> → <b>CheW (COG0835)</b> → methyl-accepting chemotaxis protein →                                                                                                                                                          |
| Dha-2-4               | NC_007907.1        | - | 3900342 | 3900103 | RNA → hypo →                                                                                                                                                                                                                                                                    |
| Cbe-1-4               | NZ_AALO01000011.1  | + | 48837   | 49071   | RNA → <b>REC (cd00156)</b> →                                                                                                                                                                                                                                                    |
| Dre-1-2               | NZ_AAOP01000061.1  | - | 15039   | 14807   | RNA → <b>PulE (COG2804)</b> → <b>PilT (COG2805)</b> → <b>PulF (COG1459)</b> → <b>PilM (COG4972)</b> → hypo → <b>PilO (COG3167)</b> → hypo → hypo → <b>Pilin (pfam00114)</b> →                                                                                                   |

|                          |                   |   |         |         |                                                                                                  |
|--------------------------|-------------------|---|---------|---------|--------------------------------------------------------------------------------------------------|
| Dha-2-5                  | NC_007907.1       | - | 5220217 | 5219978 | RNA → hypo →                                                                                     |
| <sup>9</sup> Dre-1-3     | NZ_AAOP01000054.1 | - | 2020    | 1789    | RNA →                                                                                            |
| Ame-1-8                  | NZ_AAKU01000005.1 | + | 13685   | 13919   | RNA → COG5001 (COG5001) HAMP (smart00304) →                                                      |
| Ame-1-9                  | NZ_AAKU01000041.1 | - | 13084   | 12850   | RNA → AtoS (COG2202) COG5001 (COG5001) →                                                         |
| Dre-1-4                  | NZ_AAOP01000052.1 | - | 4703    | 4474    | RNA → chemotaxis sensory transducer →                                                            |
| Cth-1-2                  | NZ_AABG04000035.1 | - | 25415   | 25181   | RNA → RNA → COG1305 (COG1305) →                                                                  |
| <sup>3</sup> Cth-1-3     | NZ_AABG04000035.1 | - | 25154   | 24915   | (shown above)                                                                                    |
| Dre-1-5                  | NZ_AAOP01000044.1 | + | 11953   | 12183   | RNA → hypo →                                                                                     |
| Csp-1-1                  | NZ_AAQV01000007.1 | - | 78184   | 77955   | RNA → N-terminal methylation → CpaA (COG4960) DiS_P_DiS (pfam06750) →                            |
| <sup>1</sup> Dre-1-6     | NZ_AAOP01000033.1 | + | 12044   | 12284   | RNA → MA (COG0840) →                                                                             |
| <sup>8</sup> Ame-1-10    | NZ_AAKU01000035.1 | + | 35923   | 36135   | RNA →                                                                                            |
| <sup>8</sup> Cdi-1-8     | NZ_AAML02000062.1 | + | 200600  | 200719  | RNA →                                                                                            |
| <sup>1</sup> Ame-1-11    | NZ_AAKU01000081.1 | + | 17391   | 17635   | RNA → ←DUF6 (pfam00892)                                                                          |
| Cth-1-4                  | NZ_AABG04000005.1 | + | 29518   | 29764   | RNA → ←RecO (COG1381)                                                                            |
| Dha-2-6                  | NC_007907.1       | - | 2621237 | 2620994 | RNA → Na_H_antiport_1 (pfam06965) →                                                              |
| Dha-1-5                  | NZ_AAAW04000001.1 | - | 760692  | 760449  | RNA → Na_H_antiport_1 (pfam06965) →                                                              |
| Planctomycetes           |                   |   |         |         |                                                                                                  |
| Bma-1-1                  | NZ_AANZ01000050.1 | - | 14174   | 13950   | RNA → Flp (COG3847) → hypo → CpaA (COG4960) →                                                    |
| <sup>5</sup> Rba-1-1     | NC_005027.1       | + | 2657899 | 2658159 | RNA → hypothetical protein-transmembrane prediction →                                            |
| <i>β</i> -proteobacteria |                   |   |         |         |                                                                                                  |
| Asp-1-1                  | NC_006513.1       | + | 718866  | 719099  | RNA → Peptidase_S8 (pfam00082) →                                                                 |
| Nmu-1-1                  | NC_007614.1       | - | 2965168 | 2964938 | RNA → hypo → hypo → FhaC (COG2831) →                                                             |
| Nmu-1-2                  | NC_007614.1       | - | 2175552 | 2175316 | RNA → Peptidase_S8 (pfam00082) →                                                                 |
| Tde-1-1                  | NC_007404.1       | + | 532900  | 533124  | RNA → CA (cd00031) Peptidase_S8 (pfam00082) →                                                    |
| Neu-1-1                  | NC_004757.1       | + | 1707540 | 1707771 | RNA → Peptidase_S8 (pfam00082) →                                                                 |
| Neu-2-1                  | NZ_AAJE01000004.1 | + | 105506  | 105735  | RNA → Peptidase_S8 (pfam00082) →                                                                 |
| Rfe-1-1                  | NC_007908.1       | + | 4400341 | 4400577 | RNA → MCPsignal (pfam00015) →                                                                    |
| Rso-1-1                  | NZ_AAKL01000070.1 | + | 1534    | 1763    | RNA → Spherulin 4 precursor →                                                                    |
| Mfl-1-1                  | NC_007947.1       | - | 503076  | 502835  | RNA → FhaC (COG2831) → FhaB (COG3210) Haemagg_act (pfam05860) → putative transmembrane protein → |
| Nmu-1-3                  | NC_007614.1       | + | 3131016 | 3131257 | hypo → putative transmembrane protein →<br>RNA → DUF839 (pfam05787) →                            |
| <i>δ</i> -proteobacteria |                   |   |         |         |                                                                                                  |
| <sup>13</sup> Sfu-1-1    | NZ_AAJF01000025.1 | - | 15131   | 14894   | RNA → hypo →                                                                                     |
| Sfu-1-2                  | NZ_AAJF01000012.1 | - | 40314   | 40081   | RNA → hypo (cons) →                                                                              |
| <sup>1</sup> Sfu-1-3     | NZ_AAJF01000032.1 | - | 3002    | 2779    | RNA → hypo →                                                                                     |
| <sup>1</sup> Sfu-1-4     | NZ_AAJF01000007.1 | - | 1839    | 1616    | RNA → hypo (cons) →                                                                              |
| <sup>8</sup> Sfu-1-5     | NZ_AAJF01000003.1 | - | 516     | 286     | RNA →                                                                                            |
| Bba-1-1                  | NC_005363.1       | - | 1073951 | 1073719 | RNA → ←BCAT_beta_family (cd01557)                                                                |
| Dde-1-1                  | NC_007519.1       | + | 841128  | 841346  | RNA → AtoC (COG2204) →                                                                           |
| Sfu-1-6                  | NZ_AAJF01000089.1 | + | 7303    | 7541    | RNA → hypo →                                                                                     |
| Sfu-1-7                  | NZ_AAJF01000020.1 | - | 67248   | 67012   | RNA → COG1639 (COG1639) →                                                                        |

|                                            |                   |   |         |         |                                                                                                                    |
|--------------------------------------------|-------------------|---|---------|---------|--------------------------------------------------------------------------------------------------------------------|
| Ade-1-1                                    | NC_007760.1       | - | 2466924 | 2466692 | RNA → COG2421 (COG2421) → Tar (COG0840) → CheW (COG0835) →                                                         |
| <sup>12</sup> Mxa-1-1                      | NC_008095.1       | - | 5500568 | 5500339 | RNA → TolB (COG0823) → hypo → hypo → hypo →                                                                        |
| <b>δ-proteobacteria Desulfuromonadales</b> |                   |   |         |         |                                                                                                                    |
| Gsu-1-1                                    | NC_002939.4       | + | 1081543 | 1081768 | RNA → hypo →                                                                                                       |
| <sup>2</sup> Gsu-1-2                       | NC_002939.4       | - | 2225994 | 2225769 | RNA → HTH_XRE (pfam01381) → PilM (COG4972) → PilN (COG3166) → PilO (COG3167) → PilP (pfam04351) → HofQ (COG4796) → |
| <sup>1</sup> Gsu-1-3                       | NC_002939.4       | - | 1711433 | 1711208 | RNA → hypo →                                                                                                       |
| <sup>1</sup> Gme-1-1                       | NC_007517.1       | - | 271494  | 271269  | RNA → hypo → COG3357 (COG3357) →                                                                                   |
| <sup>2</sup> Gsu-1-4                       | NC_002939.4       | + | 1922655 | 1922878 | RNA → cytochrome c family protein →                                                                                |
| <sup>2</sup> Gme-1-2                       | NC_007517.1       | + | 3913064 | 3913289 | RNA → RNA → ErfK_YbiS_YhnG (pfam03734) → lipoprotein, putative →                                                   |
| <sup>2,20</sup> Gme-1-3                    | NC_007517.1       | + | 3913272 | 3913497 | (shown above)                                                                                                      |
| <sup>2</sup> Gur-1-2                       | NZ_AAON01000112.1 | + | 3208    | 3432    | RNA → RNA → ErfK_YbiS_YhnG (pfam03734) →                                                                           |
| <sup>2</sup> Gur-1-1                       | NZ_AAON01000112.1 | + | 3392    | 3617    | (shown above)                                                                                                      |
| <sup>2</sup> Ppr-1-1                       | NZ_AAJH01000005.1 | - | 49446   | 49222   | RNA → RNA → LysM (cd00118) ErfK_YbiS_YhnG (pfam03734) FtsN (COG3087) →                                             |
| <sup>1</sup> Ppr-1-2                       | NZ_AAJH01000005.1 | - | 49227   | 49002   | (shown above)                                                                                                      |
| <sup>2</sup> Gsp-1-1                       | NZ_AASH01000001.1 | - | 38765   | 38540   | RNA → ErfK_YbiS_YhnG (pfam03734) → lipoprotein, putative → COG3034 (COG3034) UPF0169 (pfam03696) →                 |
| <sup>2</sup> Gsp-1-2                       | NZ_AASH01000108.1 | - | 3993    | 3768    | RNA → hypo (cons) →                                                                                                |
| <sup>2</sup> Gur-1-3                       | NZ_AAON01000070.1 | + | 16014   | 16239   | RNA → hypo (cons) →                                                                                                |
| <sup>2</sup> Gme-1-4                       | NC_007517.1       | + | 1334239 | 1334463 | RNA → Peptidase_S8 (pfam00082) →                                                                                   |
| <sup>1</sup> Gur-1-4                       | NZ_AAON01000003.1 | - | 136025  | 135799  | RNA → OmpW (pfam03922) →                                                                                           |
| <sup>1</sup> Gur-1-5                       | NZ_AAON01000006.1 | + | 111134  | 111359  | RNA → RNA → fn3 (cd00063) →                                                                                        |
| <sup>1</sup> Gur-1-10                      | NZ_AAON01000006.1 | + | 111360  | 111586  | (shown above)                                                                                                      |
| <sup>2</sup> Gsu-1-6                       | NC_002939.4       | - | 198072  | 197847  | RNA → RNA → LysM (cd00118) ErfK_YbiS_YhnG (pfam03734) → lipoprotein, putative →                                    |
| <sup>2</sup> Gsu-1-5                       | NC_002939.4       | - | 197873  | 197648  | (shown above)                                                                                                      |
| <sup>2</sup> Gur-1-7                       | NZ_AAON01000029.1 | + | 31644   | 31869   | RNA → RNA → possible cytochrome c →                                                                                |
| <sup>2</sup> Gur-1-6                       | NZ_AAON01000029.1 | + | 31872   | 32097   | (shown above)                                                                                                      |
| <sup>1</sup> Gsp-1-3                       | NZ_AASH01000018.1 | - | 17206   | 16981   | RNA → HTH_3 (pfam01381) → PilM (COG4972) → PilN (COG3166) → PilO (COG3167) → PilP (pfam04351) → HofQ (COG4796) →   |
| <sup>2</sup> Gur-1-8                       | NZ_AAON01000042.1 | - | 17722   | 17497   | RNA → HTH_3 (pfam01381) → PilM (COG4972) → PilN (COG3166) → PilO (COG3167) → PilP (pfam04351) → HofQ (COG4796) →   |
| <sup>2</sup> Gur-1-9                       | NZ_AAON01000012.1 | - | 22183   | 21958   | RNA → hypo (cons) →                                                                                                |
| <sup>2</sup> Gsu-1-7                       | NC_002939.4       | + | 1348999 | 1349223 | RNA → hypo →                                                                                                       |
| <sup>2</sup> Gme-1-6                       | NC_007517.1       | + | 2280692 | 2280917 | RNA → LasI (COG3916) →                                                                                             |
| <sup>2</sup> Gme-1-7                       | NC_007517.1       | + | 325755  | 325980  | RNA → fibronectin type III domain protein →                                                                        |
| <sup>1</sup> Gur-1-11                      | NZ_AAON01000001.1 | + | 329163  | 329388  | RNA → hypo →                                                                                                       |
| <sup>2,13</sup> Gsu-1-8                    | NC_002939.4       | - | 2133695 | 2133470 | RNA → RNA → fibronectin type III domain protein →                                                                  |
| <sup>2</sup> Gsu-1-15                      | NC_002939.4       | - | 2133429 | 2133190 | (shown above)                                                                                                      |
| <sup>2</sup> Gme-1-8                       | NC_007517.1       | + | 2447619 | 2447844 | RNA → Integrins alpha chain →                                                                                      |
| <sup>2</sup> Gsu-1-9                       | NC_002939.4       | - | 2136377 | 2136152 | RNA → RNA → hypo → hypo →                                                                                          |
| Gsu-1-16                                   | NC_002939.4       | - | 2136167 | 2135927 | (shown above)                                                                                                      |
| <sup>2</sup> Gme-1-9                       | NC_007517.1       | + | 1977793 | 1978018 | RNA → hypo →                                                                                                       |
| Gme-1-10                                   | NC_007517.1       | - | 1324617 | 1324392 | RNA → RNA → cytochrome c →                                                                                         |
| <sup>1</sup> Gme-1-5                       | NC_007517.1       | - | 1324478 | 1324253 | (shown above)                                                                                                      |

|                           |                   |   |         |         |                                                                                                                    |
|---------------------------|-------------------|---|---------|---------|--------------------------------------------------------------------------------------------------------------------|
| <sup>2</sup> Gsu-1-10     | NC_002939.4       | - | 1147037 | 1146813 | RNA → hypo →                                                                                                       |
| <sup>2</sup> Gur-1-12     | NZ_AAON01000007.1 | - | 118125  | 117901  | RNA → hypo (cons) →                                                                                                |
| <sup>2</sup> Gsp-1-4      | NZ_AASH01000010.1 | - | 61352   | 61127   | RNA → COG2340 (COG2340) →                                                                                          |
| <sup>1</sup> Gme-1-11     | NC_007517.1       | - | 1212229 | 1212004 | RNA → RNA → cytochrome c family protein, putative →                                                                |
| <sup>1</sup> Gme-1-15     | NC_007517.1       | - | 1212049 | 1211824 | (shown above)                                                                                                      |
| Gur-1-13                  | NZ_AAON01000001.1 | - | 323790  | 323566  | RNA → FN3 (cd00063) →                                                                                              |
| <sup>2</sup> Ppr-1-3      | NZ_AAJH01000033.1 | - | 4348    | 4124    | RNA → RNA → FN3 (cd00063) →                                                                                        |
| <sup>22</sup> Ppr-1-9     | NZ_AAJH01000033.1 | - | 4090    | 3851    | (shown above)                                                                                                      |
| <sup>2</sup> Gme-1-12     | NC_007517.1       | + | 158170  | 158394  | RNA → hypo →                                                                                                       |
| <sup>1</sup> Gme-1-13     | NC_007517.1       | + | 1911272 | 1911497 | RNA → possible cytochrome c →                                                                                      |
| <sup>1</sup> Gme-1-14     | NC_007517.1       | - | 265065  | 264840  | RNA → hypo →                                                                                                       |
| <sup>1,13</sup> Gsu-1-12  | NC_002939.4       | + | 2773389 | 2773614 | RNA → cytochrome c family protein, putative →                                                                      |
| <sup>2</sup> Gsp-1-5      | NZ_AASH01000089.1 | - | 6415    | 6191    | RNA → hypo (cons) →                                                                                                |
| <sup>1</sup> Gsp-1-6      | NZ_AASH01000068.1 | - | 14654   | 14430   | RNA → NLPC_P60 (pfam00877) →                                                                                       |
| <sup>2</sup> Gur-1-14     | NZ_AAON01000036.1 | + | 34196   | 34421   | RNA → Peptidase_S8 (pfam00082) He_PIG (pfam05345) →                                                                |
| <sup>2</sup> Gme-1-16     | NC_007517.1       | + | 1079465 | 1079690 | RNA → HTH_XRE (pfam01381) → PilM (COG4972) → PilN (COG3166) → PilO (COG3167) → PilP (pfam04351) → HofQ (COG4796) → |
| <sup>2</sup> Gur-1-15     | NZ_AAON01000052.1 | - | 20759   | 20534   | RNA → hypo (cons) →                                                                                                |
| <sup>1</sup> Gur-1-17     | NZ_AAON01000016.1 | - | 26009   | 25785   | RNA → RNA → hypo →                                                                                                 |
| <sup>1</sup> Gur-1-16     | NZ_AAON01000016.1 | - | 25805   | 25581   | (shown above)                                                                                                      |
| <sup>2,14</sup> Gsu-1-13  | NC_002939.4       | - | 3169147 | 3168924 | RNA → RNA → NHL repeat domain protein → OmcA cytochrome c → OmcH cytochrome c → OmcG cytochrome c → (shown above)  |
| <sup>2</sup> Gsu-1-11     | NC_002939.4       | - | 3168962 | 3168739 | (shown above)                                                                                                      |
| <sup>1</sup> Ppr-1-4      | NZ_AAJH01000009.1 | + | 15928   | 16152   | RNA → lipoprotein, putative →                                                                                      |
| <sup>2</sup> Gur-1-18     | NZ_AAON01000061.1 | - | 21952   | 21726   | RNA → COG4728 (COG4728) →                                                                                          |
| <sup>1</sup> Gur-1-19     | NZ_AAON01000001.1 | - | 326323  | 326099  | RNA → FN3 (cd00063) →                                                                                              |
| <sup>1</sup> Ppr-1-5      | NZ_AAJH01000009.1 | + | 90120   | 90344   | RNA → hypo → hypo → ErfK (COG1376) →                                                                               |
| <sup>6</sup> Gur-1-20     | NZ_AAON01000044.1 | - | 2314    | 2088    | RNA → fibronectin type III domain protein →                                                                        |
| <sup>2</sup> Gur-1-21     | NZ_AAON01000009.1 | + | 860     | 1088    | RNA → Rfe (COG0472) FkpA (COG0545) → hypo →                                                                        |
| <sup>1,6,18</sup> Ppr-1-6 | NZ_AAJH01000007.1 | + | 70238   | 70462   | RNA → hypo →                                                                                                       |
| <sup>1</sup> Pca-1-1      | NC_007498.2       | + | 1987037 | 1987265 | RNA → PaaK (COG1541) →                                                                                             |
| <sup>2</sup> Gur-1-22     | NZ_AAON01000045.1 | + | 6858    | 7084    | RNA → ElaC (COG1234) →                                                                                             |
| Gur-1-23                  | NZ_AAON01000001.1 | + | 248116  | 248343  | RNA → conserved hypothetical transmembrane protein →                                                               |
| <sup>3</sup> Gur-1-24     | NZ_AAON01000012.1 | - | 27568   | 27340   | RNA → hypo →                                                                                                       |
| <sup>1</sup> Ppr-1-7      | NZ_AAJH01000013.1 | - | 36477   | 36247   | RNA → hypo → arch_bact_SO_family_Moco (cd02109) →                                                                  |
| <sup>2</sup> Gur-1-25     | NZ_AAON01000009.1 | - | 57295   | 57067   | RNA → DUF11 (pfam01345) →                                                                                          |
| Gur-1-27                  | NZ_AAON01000009.1 | - | 58079   | 57851   | RNA → RNA → hypo →                                                                                                 |
| <sup>4,17</sup> Gur-1-26  | NZ_AAON01000009.1 | - | 57835   | 57608   | (shown above)                                                                                                      |
| Pca-1-2                   | NC_007498.2       | + | 1774619 | 1774846 | RNA → Calx_beta (smart00237) Amb_all (smart00656) →                                                                |
| Pca-1-3                   | NC_007498.2       | + | 1141626 | 1141851 | RNA → RNA → Tar (COG0840) Cache (pfam02743) HAMP (smart00304) →                                                    |
| Pca-1-4                   | NC_007498.2       | + | 1141853 | 1142078 | (shown above)                                                                                                      |
| Dac-1-1                   | NZ_AAEW02000001.1 | - | 146764  | 146537  | RNA → PAS (cd00130) GGDEF (cd01949) →                                                                              |
| Dac-1-2                   | NZ_AAEW02000011.1 | + | 10503   | 10727   | RNA → BacS (COG0642) → AtoC (COG2204) →                                                                            |
| Ppr-1-8                   | NZ_AAJH01000005.1 | - | 168865  | 168639  | RNA → COG3287 (COG3287) →                                                                                          |

|                                  |                    |   |         |         |                                                                                        |
|----------------------------------|--------------------|---|---------|---------|----------------------------------------------------------------------------------------|
| Pca-1-5                          | NC_007498.2        | + | 2380546 | 2380772 | RNA → PAS (cd00130)COG5001 (COG5001) →                                                 |
| Gur-1-28                         | NZ_AAON01000004.1  | + | 8881    | 9106    | RNA → hypo →                                                                           |
| <sup>2</sup> Gsu-1-14            | NC_002939.4        | - | 1100143 | 1099911 | RNA → hypo →                                                                           |
| <sup>2</sup> Ppr-1-10            | NZ_AAJH01000008.1  | + | 50456   | 50692   | RNA → FN3 (cd00063) →                                                                  |
| Gme-1-17                         | NC_007517.1        | - | 824437  | 824205  | RNA → Peptidase_S8 (pfam00082) →                                                       |
| Gme-1-18                         | NC_007517.1        | - | 827292  | 827060  | RNA → Peptidase_S8 (pfam00082) →                                                       |
| <sup>15,16</sup> Gsu-1-17        | NC_002939.4        | - | 2760060 | 2759831 | RNA → OmcS cytochrome c → OmcT cytochrome c →                                          |
| Ppr-1-11                         | NZ_AAJH01000006.1  | - | 37060   | 36835   | RNA → COG4748 (COG4748) →                                                              |
| <sup>13</sup> Ppr-1-12           | NZ_AAJH01000014.1  | + | 103351  | 103576  | RNA → RVT (pfam00078) → COG3440 (COG3440) → hypo → Hit (COG0537) → HNH nuclease →      |
| Ppr-1-13                         | NZ_AAJH01000020.1  | - | 5337    | 5113    | RNA → hypo → hypo → hypo → KU (cd00109) → hypo → hypo → CumB (COG0590) →               |
| <sup>13</sup> Ppr-1-14           | NZ_AAJH01000008.1  | + | 119644  | 119871  | RNA → ←hypo                                                                            |
| Ppr-1-15                         | NZ_AAJH01000013.1  | - | 52189   | 51962   | RNA → DUF898 (pfam05987) → COG4783 (COG4783) →                                         |
| Pca-1-7                          | NC_007498.2        | - | 2648195 | 2647968 | RNA → LprI (COG4461) →                                                                 |
| Gur-1-29                         | NZ_AAON01000062.1  | - | 19084   | 18856   | RNA → hypo → COG0714 (COG0714) → COG1721 (COG1721) → COG1305 (COG1305) →               |
| Ppr-1-16                         | NZ_AAJH01000030.1  | + | 12235   | 12457   | RNA → hypo (cons) →                                                                    |
| <sup>13</sup> Ppr-1-17           | NZ_AAJH01000006.1  | + | 28150   | 28373   | RNA → hypo → COG2206 (COG2206) →                                                       |
| Pca-1-8                          | NC_007498.2        | - | 668521  | 668294  | RNA → CheW (COG0835) →                                                                 |
| Pca-1-9                          | NC_007498.2        | - | 2400104 | 2399873 | RNA → RNA → hypo → hypo → FimC (COG3121) → FimD (COG3188) → COG5430 (COG5430) → hypo → |
| Pca-1-6                          | NC_007498.2        | - | 2399816 | 2399586 | (shown above)                                                                          |
| Gme-1-19                         | NC_007517.1        | - | 1623888 | 1623647 | RNA → hypo → PstS (COG0226) → hypo → Peptidase_S8 (pfam00082) →                        |
| Gsp-1-7                          | NZ_AAASH01000154.1 | + | 1294    | 1555    | RNA → OtsB (COG1877) →                                                                 |
| <sup>2,11</sup> Gur-1-30         | NZ_AAON01000055.1  | - | 19768   | 19456   | RNA → hypo →                                                                           |
| γ-proteobacteria                 |                    |   |         |         |                                                                                        |
| Osp-1-1                          | NZ_AAOW01000025.1  | + | 38985   | 39208   | RNA → ←hypo                                                                            |
| Osp-1-2                          | NZ_AAOW01000010.1  | - | 54987   | 54764   | RNA → hypo →                                                                           |
| Tcr-1-1                          | NC_007520.1        | + | 1048719 | 1048942 | RNA → PrfC (COG4108) →                                                                 |
| Tcr-1-2                          | NC_007520.1        | + | 326011  | 326238  | RNA → RNA → hypo →                                                                     |
| <sup>21</sup> Tcr-1-3            | NC_007520.1        | + | 326188  | 326416  | (shown above)                                                                          |
| Tcr-1-4                          | NC_007520.1        | + | 1051134 | 1051366 | RNA → ←MgtE (COG2239)                                                                  |
| Osp-1-3                          | NZ_AAOW01000017.1  | - | 31244   | 31010   | RNA → hypo →                                                                           |
| γ-proteobacteria Alteromonadales |                    |   |         |         |                                                                                        |
| Ptu-1-1                          | NZ_AAOH01000007.1  | + | 198689  | 198925  | RNA → hypo (COG3397) →                                                                 |
| Pin-1-1                          | NZ_AAQS01000002.1  | + | 382853  | 383077  | RNA → ←hypo                                                                            |
| Pin-1-3                          | NZ_AAQS01000002.1  | + | 375851  | 376075  | RNA → RNA → FimC (COG3121) → hypo → hypo → hypo →                                      |
| <sup>23</sup> Pin-1-2            | NZ_AAQS01000002.1  | + | 376323  | 376547  | (shown above)                                                                          |
| Ptu-1-2                          | NZ_AAOH01000001.1  | - | 581796  | 581564  | RNA → hypo → Cdd (COG0295) →                                                           |
| Cps-1-1                          | NC_003910.7        | + | 4612611 | 4612842 | RNA → ←DUF885 (pfam05960)                                                              |
| Ptu-1-3                          | NZ_AAOH01000011.1  | - | 15155   | 14922   | RNA → ←DUF885 (pfam05960)                                                              |
| Iba-1-1                          | NZ_AAMX01000014.1  | - | 21303   | 21068   | RNA → RNA → hypo → FimC (COG3121) → FimD (COG3188) → hypo → hypo →                     |
| <sup>3</sup> Iba-1-2             | NZ_AAMX01000014.1  | - | 21204   | 20963   | (shown above)                                                                          |
| Cps-1-2                          | NC_003910.7        | - | 1642525 | 1642281 | RNA → hypo →                                                                           |



|         |                   |   |        |        |                                  |
|---------|-------------------|---|--------|--------|----------------------------------|
| Cps-1-3 | NC_003910.7       | + | 807375 | 807608 | RNA → Peptidase_S8 (pfam00082) → |
| Pin-1-5 | NZ_AAQS01000001.1 | - | 448948 | 448709 | RNA → RNA → FN3 (cd00063) →      |
| Pin-1-4 | NZ_AAQS01000001.1 | - | 448943 | 448714 | (shown above)                    |
| Sde-1-1 | NC_007912.1       | - | 787494 | 787252 | RNA → COG2206 (COG2206) →        |
| Sde-1-2 | NC_007912.1       | - | 989437 | 989199 | RNA → VCBS →                     |

γ-proteobacteria Alteromonadales Shewanellaceae

|         |                   |   |         |         |                                                                                             |
|---------|-------------------|---|---------|---------|---------------------------------------------------------------------------------------------|
| Ssp-2-1 | NC_008321.1       | - | 3621627 | 3621383 | RNA → COG3397 (COG3397) →                                                                   |
| Ssp-2-2 | NZ_AALX01000002.1 | - | 189810  | 189566  | RNA → COG3397 (COG3397) →                                                                   |
| Ssp-3-1 | NC_008322.1       | + | 1084468 | 1084712 | RNA → COG3397 (COG3397) →                                                                   |
| Ssp-1-1 | NZ_AALH01000037.1 | - | 36492   | 36248   | RNA → COG3397 (COG3397) → chitin-binding protein, putative (COG3397) →                      |
| Son-1-1 | NC_004347.1       | + | 1112481 | 1112723 | RNA → COG3397 (COG3397) →                                                                   |
| Ssp-1-2 | NZ_AALH01000007.1 | + | 38142   | 38379   | RNA → ChtBD3 (cd00036)Chitinase_N_term (cd02848)CBM_5_12 (pfam02839)Glyco_18 (smart00636) → |
| Sde-2-1 | NC_007954.1       | + | 2534228 | 2534466 | RNA → ChtBD3 (cd00036)Chitinase_N_term (cd02848)CBM_5_12 (pfam02839)Glyco_18 (smart00636) → |
| Ssp-2-3 | NC_008321.1       | - | 3357377 | 3357141 | RNA → Chitinase_N_term (cd02848)Glyco_18 (smart00636)CBM_5_12 (pfam02839)ChtBD3 (cd00036) → |
| Ssp-2-4 | NZ_AALX01000009.1 | - | 110338  | 110102  | RNA → ChtBD3 (cd00036)Chitinase_N_term (cd02848)CBM_5_12 (pfam02839)Glyco_18 (smart00636) → |
| Ssp-3-2 | NC_008322.1       | - | 3427742 | 3427506 | RNA → Chitinase_N_term (cd02848)Glyco_18 (smart00636)CBM_5_12 (pfam02839)ChtBD3 (cd00036) → |
| Sba-1-1 | NZ_AAIO01000021.1 | + | 39081   | 39318   | RNA → Chitinase_N_term (cd02848)Glyco_18 (smart00636)CBM_5_12 (pfam02839)ChtBD3 (cd00036) → |
| Sba-2-1 | NZ_AATK01000022.1 | - | 37835   | 37598   | RNA → ChtBD3 (cd00036)Chitinase_N_term (cd02848)CBM_5_12 (pfam02839)Glyco_18 (smart00636) → |
| Sba-1-2 | NZ_AAIO01000008.1 | + | 90948   | 91196   | RNA → COG3397 (COG3397) →                                                                   |
| Sba-2-2 | NZ_AATK01000001.1 | - | 353245  | 352997  | RNA → COG3397 (COG3397) →                                                                   |
| Ssp-5-1 | NZ_AALN01000129.1 | + | 3287    | 3518    | RNA → hypo →                                                                                |
| Ssp-2-5 | NC_008321.1       | - | 4029417 | 4029179 | RNA → hypo →                                                                                |
| Ssp-2-6 | NZ_AALX01000001.1 | - | 135065  | 134827  | RNA → hypo →                                                                                |
| Ssp-3-3 | NC_008322.1       | + | 675036  | 675274  | RNA → hypo →                                                                                |
| Ssp-4-1 | NZ_AALS01000036.1 | + | 17674   | 17908   | RNA → Peptidase_M11 (pfam05548) →                                                           |

γ-proteobacteria Vibrionales Vibrionaceae

|                       |                   |   |         |         |                                                                            |
|-----------------------|-------------------|---|---------|---------|----------------------------------------------------------------------------|
| Ppr-3-1               | NC_006370.1       | + | 2634481 | 2634717 | RNA → hypothetical ToxR-regulated lipoprotein →                            |
| Ppr-2-1               | NZ_AAPH01000029.1 | - | 24025   | 23789   | RNA → hypothetical ToxR-regulated lipoprotein →                            |
| Vsp-3-1               | NZ_AAMR01000015.1 | - | 100102  | 99864   | RNA → COG3397 (COG3397) →                                                  |
| Ppr-3-2               | NC_006371.1       | + | 355541  | 355774  | RNA → COG3397 (COG3397) → CybB (COG3038) →                                 |
| Ppr-2-2               | NZ_AAPH01000007.1 | - | 119243  | 119010  | RNA → CybB (COG3038) →                                                     |
| <sup>24</sup> Vch-2-1 | NC_002505.1       | + | 1860690 | 1860925 | RNA → TfoX (COG3070)TfoX_C (pfam04994) →                                   |
| Vch-1-1               | NZ_AAKF01000010.1 | + | 66156   | 66391   | RNA → TfoX (COG3070)TfoX_C (pfam04994) →                                   |
| Vch-3-1               | NZ_AAKG01000001.1 | + | 1413803 | 1414038 | RNA → TfoX (COG3070)TfoX_C (pfam04994) →                                   |
| Vch-5-1               | NZ_AAKI01000205.1 | + | 250     | 485     | RNA → TfoX (COG3070)TfoX_C (pfam04994) →                                   |
| Vch-6-1               | NZ_AAKJ01000049.1 | - | 15093   | 14858   | RNA → TfoX (COG3070)TfoX_C (pfam04994) →                                   |
| <sup>13</sup> Vpa-1-1 | NC_004603.1       | - | 1078742 | 1078504 | RNA → TfoX (COG3070)TfoX_C (pfam04994) →                                   |
| Vsp-1-1               | NZ_AAKK01000069.1 | + | 16343   | 16581   | RNA → TfoX (COG3070)TfoX_C (pfam04994) →                                   |
| Val-1-1               | NZ_AAPS01000039.1 | + | 21459   | 21697   | RNA → TfoX (COG3070)TfoX_C (pfam04994) →                                   |
| Vvu-2-1               | NC_005139.1       | + | 2327906 | 2328143 | RNA → TfoX (COG3070)TfoX_C (pfam04994) → hypo → COG0398 (COG0398) → hypo → |
| Vvu-1-1               | NC_004459.1       | - | 2138128 | 2137891 | RNA → TfoX (COG3070)TfoX_C (pfam04994) →                                   |

|                       |                   |   |         |         |                                           |
|-----------------------|-------------------|---|---------|---------|-------------------------------------------|
| Vsp-3-2               | NZ_AAMR01000021.1 | - | 11847   | 11613   | RNA → TfoX (COG3070) TfoX_C (pfam04994) → |
| Vsp-2-1               | NZ_AAND01000010.1 | - | 47376   | 47142   | RNA → TfoX (COG3070) TfoX_C (pfam04994) → |
| Vfi-1-1               | NC_006840.1       | + | 1765122 | 1765353 | RNA → TfoX (COG3070) TfoX_C (pfam04994) → |
| Van-1-1               | NZ_AAOJ01000002.1 | + | 319461  | 319700  | RNA → TfoX (COG3070) TfoX_C (pfam04994) → |
| Psp-1-1               | NZ_AAOU01000011.1 | - | 39728   | 39489   | RNA → TfoX (COG3070) TfoX_C (pfam04994) → |
| Vvu-2-2               | NC_005140.1       | - | 624584  | 624344  | RNA → COG3397 (COG3397) →                 |
| Vvu-1-2               | NC_004460.1       | - | 45973   | 45733   | RNA → COG3397 (COG3397) →                 |
| Val-1-2               | NZ_AAPS01000001.1 | - | 220352  | 220103  | RNA → COG3397 (COG3397) →                 |
| Vpa-1-2               | NC_004605.1       | + | 1695926 | 1696179 | RNA → COG3397 (COG3397) →                 |
| <sup>10</sup> Vch-2-2 | NC_002506.1       | + | 755256  | 755511  | RNA → gbpA (COG3397) →                    |
| Vch-1-2               | NZ_AAKF01000075.1 | - | 10547   | 10292   | RNA → COG3397 (COG3397) →                 |
| Vch-3-2               | NZ_AAKG01000002.1 | - | 469864  | 469609  | RNA → COG3397 (COG3397) →                 |
| Vch-6-2               | NZ_AAKJ01000108.1 | + | 431     | 686     | RNA → COG3397 (COG3397) →                 |
| Vch-5-2               | NZ_AAKI01000159.1 | + | 2735    | 2990    | RNA → COG3397 (COG3397) →                 |
| Vch-4-1               | NZ_AAKH01000394.1 | + | 795     | 1050    | RNA → COG3397 (COG3397) →                 |
| Ppr-3-3               | NC_006370.1       | + | 2427572 | 2427826 | RNA → TfoX (COG3070) TfoX_C (pfam04994) → |
| Ppr-2-3               | NZ_AAPH01000002.1 | + | 334491  | 334746  | RNA → TfoX (COG3070) TfoX_C (pfam04994) → |

environmental

|                     |                |   |       |       |                 |
|---------------------|----------------|---|-------|-------|-----------------|
| <sup>19</sup> env-1 | AACY01000627.1 | - | 67366 | 67122 | RNA → unknown → |
| env-2               | AACY01284074.1 | - | 497   | 253   | RNA →           |
| env-3               | AACY01051455.1 | - | 8816  | 8574  | RNA → unknown → |
| env-4               | AACY01015263.1 | - | 990   | 756   | RNA → unknown → |
| env-5               | AACY01087074.1 | + | 8438  | 8674  | RNA → unknown → |
| env-6               | AACY01120393.1 | + | 33821 | 34057 | RNA → unknown → |
| env-7               | AACY01051687.1 | - | 29054 | 28817 | RNA → unknown → |
| <sup>7</sup> env-8  | AACY01072018.1 | + | 1679  | 1913  | RNA →           |
| env-9               | AACY01017015.1 | - | 1336  | 1099  | RNA → unknown → |
| env-10              | AACY01032628.1 | + | 900   | 1132  | RNA → unknown → |
| <sup>8</sup> env-11 | AACY01085957.1 | - | 232   | 1     | RNA →           |

**cd00031** Cadherin repeat domain; Cadherins are glycoproteins involved in Ca<sup>2+</sup>-mediated cell-cell adhesion; these domains occur as repeats in the extracellular regions which are thought to mediate cell-cell contact when bound to calcium; plays a role in cell fate, signalling, proliferation, differentiation, and migration; members include E-, N-, P-, T-, VE-, CNR-, proto-, and FAT-family cadherin, desmocollin, and desmoglein, exists as monomers or dimers (hetero- and homo-); two copies of the repeat are present here

**cd00036** Chitin/cellulose binding domain.

**cd00063** Fibronectin type III domain.

**cd00093** Helix-turn-helix XRE-family like proteins.

**cd00109** BPTI/Kunitz family of serine protease inhibitors; Structure is a disulfide rich

alpha+beta fold.

**cd00118** Lysin motif;

**cd00130** PAS domain; PAS motifs appear in archaea, eubacteria and eukarya.

**cd00156** Signal receiver domain; originally thought to be unique to bacteria (CheY, OmpR, NtrC, and PhoB), now recently identified in eukaryotes ETR1 Arabidopsis thaliana; this domain receives the signal from the sensor partner in a two-component systems; contains a phosphoacceptor site that is phosphorylated by histidine kinase homologs; usually found N-terminal to a DNA binding effector domain; forms homodimers

**cd00830** Ketoacyl-acyl carrier protein synthase III (KASIII) initiates the elongation in type II fatty acid synthase systems.

**cd01055** Nonheme Ferritin domain, found in Archaea and Bacteria, is a member of a broad superfamily of ferritin-like diiron-carboxylate proteins.

**cd01557** BCAT\_beta\_family: Branched-chain aminotransferase catalyses the transamination of the branched-chain amino acids leucine, isoleucine and valine to their respective alpha-keto acids, alpha-ketoisocaproate, alpha-keto-beta-methylvalerate and alpha-ketoisovalerate.

**cd01948** EAL domain.

**cd01949** Diguanylate-cyclase (DGC) or GGDEF domain: Originally named after a conserved residue pattern, and initially described as domain of unknown function 1 (DUF1).

**cd02109** bacterial and archael members of the sulfite oxidase (SO) family of molybdopterin binding domains.

**cd02848** Chitinase N-terminus domain.

**COG0110** Acetyltransferase (isoleucine patch superfamily) [General function prediction only]

**COG0226** ABC-type phosphate transport system, periplasmic component [Inorganic ion transport and metabolism]

**COG0295** Cytidine deaminase [Nucleotide transport and metabolism]

**COG0398** Uncharacterized conserved protein [Function unknown]

**COG0472** UDP-N-acetylmuramyl pentapeptide phosphotransferase/UDP-N-acetylglucosamine-1-phosphate transferase [Cell envelope biogenesis, outer membrane]

**COG0502** Biotin synthase and related enzymes [Coenzyme metabolism]

**COG0537** Diadenosine tetraphosphate (Ap4A) hydrolase and other HIT family hydrolases [Nucleotide transport and metabolism / Carbohydrate transport and metabolism / General function prediction only]

**COG0545** FKBP-type peptidyl-prolyl cis-trans isomerases 1 [Posttranslational modification, protein turnover, chaperones]

**COG0590** Cytosine/adenosine deaminases [Nucleotide transport and metabolism / Translation, ribosomal structure and biogenesis]

**COG0672** Signal transduction histidine kinase [Signal transduction mechanisms]

**COG0643** Chemotaxis protein histidine kinase and related kinases [Cell motility and secretion / Signal transduction mechanisms]

**COG0714** MoxR-like ATPases [General function prediction only]

**COG0823** Periplasmic component of the Tol biopolymer transport system [Intracellular trafficking and secretion]

**COG0835** CheW, a small regulator protein, unique to the chemotaxis signalling in prokaryotes and archaea.

**COG0840** Methyl-accepting chemotaxis-like domains (chemotaxis sensory transducer).

**COG1020** Non-ribosomal peptide synthetase modules and related proteins [Secondary metabolites biosynthesis, transport, and catabolism]

**COG1157** Flagellar biosynthesis/type III secretory pathway ATPase [Cell motility and secretion / Intracellular trafficking and secretion]

**COG1234** Metal-dependent hydrolases of the beta-lactamase superfamily III [General function prediction only]

**COG1256** Flagellar hook-associated protein [Cell motility and secretion]

**COG1291** Flagellar motor component [Cell motility and secretion]

**COG1305** Transglutaminase-like enzymes, putative cysteine proteases [Amino acid transport and metabolism]

**COG1315** Predicted polymerase, most proteins contain PALM domain, HD hydrolase domain and Zn-ribbon domain [DNA replication, recombination, and repair]

**COG1316** Transcriptional regulator [Transcription]

**COG1317** Flagellar biosynthesis/type III secretory pathway protein [Cell motility and secretion / Intracellular trafficking and secretion]

**COG1360** Flagellar motor protein [Cell motility and secretion]

**COG1376** Uncharacterized protein conserved in bacteria [Function unknown]

**COG1381** Recombinational DNA repair protein (RecF pathway) [DNA replication, recombination, and repair]

**COG1406** Predicted inhibitor of MCP methylation, homolog of CheC [Cell motility and secretion]

**COG1413** FOG: HEAT repeat [Energy production and conversion]

**COG1459** Type II secretory pathway, component PuF [Cell motility and secretion / Intracellular trafficking and secretion]

**COG1536** Flagellar motor switch protein [Cell motility and secretion]

**COG1541** Coenzyme F390 synthetase [Coenzyme metabolism]

**COG1558** Flagellar basal body rod protein [Cell motility and secretion]

**COG1595** DNA-directed RNA polymerase specialized sigma subunit, sigma24 homolog [Transcription]

**COG1639** Predicted signal transduction protein [Signal transduction mechanisms]

**COG1677** Flagellar hook-basal body protein [Cell motility and secretion / Intracellular trafficking and secretion]

**COG1721** Uncharacterized conserved protein (some members contain a von Willebrand factor type A (vWA) domain) [General function prediction only]

**COG1766** Flagellar biosynthesis/type III secretory pathway lipoprotein [Cell motility and secretion / Intracellular trafficking and secretion]

**COG1815** Flagellar basal body protein [Cell motility and secretion]

**COG1843** Flagellar hook capping protein [Cell motility and secretion]

**COG1868** Flagellar motor switch protein [Cell motility and secretion]

**COG1877** Trehalose-6-phosphatase [Carbohydrate transport and metabolism]

**COG2201** Chemotaxis response regulator containing a CheY-like receiver domain and a methylesterase domain [Cell motility and secretion / Signal transduction mechanisms]

**COG2202** FOG: PAS/PAC domain [Signal transduction mechanisms]

**COG2204** Response regulator containing CheY-like receiver, AAA-type ATPase, and DNA-binding domains [Signal transduction mechanisms]  
**COG2206** HD-GYP domain [Signal transduction mechanisms]  
**COG2239** Mg/Co/Ni transporter MgtE (contains CBS domain) [Inorganic ion transport and metabolism]  
**COG2340** Uncharacterized protein with SCP/PR1 domains [Function unknown]  
**COG2421** Predicted acetamidase/formamidase [Energy production and conversion]  
**COG2804** Type II secretory pathway, ATPase PulE/Tfp pilus assembly pathway, ATPase PilB [Cell motility and secretion / Intracellular trafficking and secretion]  
**COG2805** Tfp pilus assembly protein, pilus retraction ATPase PilT [Cell motility and secretion / Intracellular trafficking and secretion]  
**COG2831** Hemolysin activation/secretion protein [Intracellular trafficking and secretion]  
**COG3034** Uncharacterized protein conserved in bacteria [Function unknown]  
**COG3038** Cytochrome B561 [Energy production and conversion]  
**COG3070** Regulator of competence-specific genes [Transcription]  
**COG3087** Cell division protein [Cell division and chromosome partitioning]  
**COG3171** P pilus assembly protein, chaperone PapD [Cell motility and secretion / Intracellular trafficking and secretion]  
**COG3166** Tfp pilus assembly protein PilN [Cell motility and secretion / Intracellular trafficking and secretion]  
**COG3167** Tfp pilus assembly protein PilO [Cell motility and secretion / Intracellular trafficking and secretion]  
**COG3188** P pilus assembly protein, porin PapC [Cell motility and secretion / Intracellular trafficking and secretion]  
**COG3191** L-aminopeptidase/D-esterase [Amino acid transport and metabolism / Secondary metabolites biosynthesis, transport, and catabolism]  
**COG3210** Large exoproteins involved in heme utilization or adhesion [Intracellular trafficking and secretion]  
**COG3287** Uncharacterized conserved protein [Function unknown]  
**COG3320** Putative dehydrogenase domain of multifunctional non-ribosomal peptide synthetases and related enzymes [Secondary metabolites biosynthesis, transport, and catabolism]  
**COG3357** Predicted transcriptional regulator containing an HTH domain fused to a Zn-ribbon [Transcription]  
**COG3397** Uncharacterized protein conserved in bacteria [Function unknown]  
**COG3440** Predicted restriction endonuclease [Defense mechanisms]  
**COG3829** Transcriptional regulator containing PAS, AAA-type ATPase, and DNA-binding domains [Transcription / Signal transduction mechanisms]  
**COG3847** Flp pilus assembly protein, pilin Flp [Intracellular trafficking and secretion]  
**COG3916** N-acyl-L-homoserine lactone synthetase [Signal transduction mechanisms / Secondary metabolites biosynthesis, transport, and catabolism]  
**COG4108** Peptide chain release factor RF-3 [Translation, ribosomal structure and biogenesis]  
**COG4461** Uncharacterized protein conserved in bacteria, putative lipoprotein [Function unknown]  
**COG4728** Uncharacterized protein conserved in bacteria [Function unknown]  
**COG4748** Uncharacterized conserved protein [Function unknown]  
**COG4783** Putative Zn-dependent protease, contains TPR repeats [General function prediction only]  
**COG4786** Flagellar basal body rod protein [Cell motility and secretion]  
**COG4796** Type II secretory pathway, component HofQ [Intracellular trafficking and secretion]  
**COG4932** Predicted outer membrane protein [Cell envelope biogenesis, outer membrane]  
**COG4960** Flp pilus assembly protein, protease CpaA [Posttranslational modification, protein turnover, chaperones / Intracellular trafficking and secretion]  
**COG4972** Tfp pilus assembly protein, ATPase PilM [Cell motility and secretion / Intracellular trafficking and secretion]  
**COG5001** Predicted signal transduction protein containing a membrane domain, an EAL and a GGDEF domain [Signal transduction mechanisms]  
**COG5430** Uncharacterized secreted protein [Function unknown]  
**pfam00015** Methyl-accepting chemotaxis protein (MCP) signaling domain.  
**pfam00078** Reverse transcriptase (RNA-dependent DNA polymerase).  
**pfam00082** Subtilase family.  
**pfam00114** Pilin (bacterial filament).  
**pfam00550** Phosphopantetheine attachment site.  
**pfam00665** Integrase core domain.  
**pfam00668** Condensation domain.  
**pfam00759** Glycosyl hydrolase family 9.  
**pfam00785** PAC motif.  
**pfam00877** NlpC/P60 family.  
**pfam00892** Integral membrane protein DUF6.  
**pfam00942** Cellulose binding domain.  
**pfam01345** Domain of unknown function DUF11.  
**pfam01361** Tautomerase enzyme.  
**pfam01381** Helix-turn-helix XRE-family like proteins ;  
**pfam01527** Transposase.  
**pfam01627** Hpt domain.  
**pfam01909** Nucleotidyltransferase domain.  
**pfam01966** HD domain.  
**pfam02011** Glycosyl hydrolase family 48.































## 2.2 The SAH motif

Notes:

- <sup>1</sup> BLAST indicates that the downstream gene is probably *metH*. Also, the first roughly 30 amino acids (90 nucleotides) are not conserved. Therefore, we have annotated a start codon after the predicted RNA that is highly consistent with other instances.
- <sup>2</sup> No downstream is annotated in this shotgun fragment, but BLAST homology supports the annotated start codon, and that the gene is *acyH*.

### abbrev. of hits

Fsp-1-1 to Fsp-1-1  
 Bma-1-1 to Bma-1-1  
 Bma-2-1 to Bma-2-1  
 Bma-3-1 to Bma-3-1  
 Bma-4-1 to Bma-4-1  
 Bma-5-1 to Bma-5-1  
 Bma-6-1 to Bma-6-1  
 Bma-7-1 to Bma-7-1  
 Bma-8-1 to Bma-8-1  
 Bma-9-1 to Bma-9-1  
 Bps-1-1 to Bps-1-1  
 Bps-2-1 to Bps-2-1  
 Bps-3-1 to Bps-3-1  
 Bps-4-1 to Bps-4-1  
 Bps-5-1 to Bps-5-1  
 Bps-6-1 to Bps-6-1  
 Bps-7-1 to Bps-7-1  
 Bps-8-1 to Bps-8-1  
 Bps-9-1 to Bps-9-1  
 Bps-10-1 to Bps-10-1  
 Bth-1-1 to Bth-1-1  
 Aeh-1-1 to Aeh-1-1  
 Mca-1-1 to Mca-1-1  
 Avi-1-1 to Avi-1-1  
 Pae-1-1 to Pae-1-1  
 Pae-2-1 to Pae-2-1  
 Pae-3-1 to Pae-3-1  
 Pae-4-1 to Pae-4-1  
 Pae-5-1 to Pae-5-1  
 Pen-1-1 to Pen-1-1  
 Pfl-1-1 to Pfl-1-1  
 Pfl-2-1 to Pfl-2-1  
 Ppu-1-1 to Ppu-1-1  
 Ppu-2-1 to Ppu-2-1  
 Psy-1-1 to Psy-1-1  
 Psy-2-1 to Psy-2-1  
 Psy-3-1 to Psy-3-1  
 Xax-1-1 to Xax-1-1

### taxonomy of species

Actinobacteria Actinobacteridae Actinomycetales Frankineae Frankiaceae *Frankia sp.* EAN1pec  
 $\beta$ -proteobacteria Burkholderiales Burkholderiaceae *Burkholderia mallei* 10229  
 $\beta$ -proteobacteria Burkholderiales Burkholderiaceae *Burkholderia mallei* 10399  
 $\beta$ -proteobacteria Burkholderiales Burkholderiaceae *Burkholderia mallei* 2002721280  
 $\beta$ -proteobacteria Burkholderiales Burkholderiaceae *Burkholderia mallei* ATCC 23344  
 $\beta$ -proteobacteria Burkholderiales Burkholderiaceae *Burkholderia mallei* FMH  
 $\beta$ -proteobacteria Burkholderiales Burkholderiaceae *Burkholderia mallei* GB8 horse 4  
 $\beta$ -proteobacteria Burkholderiales Burkholderiaceae *Burkholderia mallei* JHU  
 $\beta$ -proteobacteria Burkholderiales Burkholderiaceae *Burkholderia mallei* NCTC 10247  
 $\beta$ -proteobacteria Burkholderiales Burkholderiaceae *Burkholderia mallei* SAVP1  
 $\beta$ -proteobacteria Burkholderiales Burkholderiaceae Burkholderia pseudomallei group *Burkholderia pseudomallei* 1106a  
 $\beta$ -proteobacteria Burkholderiales Burkholderiaceae Burkholderia pseudomallei group *Burkholderia pseudomallei* 1106b  
 $\beta$ -proteobacteria Burkholderiales Burkholderiaceae Burkholderia pseudomallei group *Burkholderia pseudomallei* 1655  
 $\beta$ -proteobacteria Burkholderiales Burkholderiaceae Burkholderia pseudomallei group *Burkholderia pseudomallei* 1710a  
 $\beta$ -proteobacteria Burkholderiales Burkholderiaceae Burkholderia pseudomallei group *Burkholderia pseudomallei* 1710b  
 $\beta$ -proteobacteria Burkholderiales Burkholderiaceae Burkholderia pseudomallei group *Burkholderia pseudomallei* 406e  
 $\beta$ -proteobacteria Burkholderiales Burkholderiaceae Burkholderia pseudomallei group *Burkholderia pseudomallei* 668  
 $\beta$ -proteobacteria Burkholderiales Burkholderiaceae Burkholderia pseudomallei group *Burkholderia pseudomallei* K96243  
 $\beta$ -proteobacteria Burkholderiales Burkholderiaceae Burkholderia pseudomallei group *Burkholderia pseudomallei* Pasteur  
 $\beta$ -proteobacteria Burkholderiales Burkholderiaceae Burkholderia pseudomallei group *Burkholderia pseudomallei* S13  
 $\beta$ -proteobacteria Burkholderiales Burkholderiaceae Burkholderia pseudomallei group *Burkholderia thailandensis* E264  
 $\gamma$ -proteobacteria Chromatiales Ectothiorhodospiraceae *Alkalilimnicola ehrlichei* MLHE-1  
 $\gamma$ -proteobacteria Methylococcales Methylococcaceae *Methylococcus capsulatus str.* Bath  
 $\gamma$ -proteobacteria Pseudomonadales Pseudomonadaceae *Azotobacter vinelandii* AvOP  
 $\gamma$ -proteobacteria Pseudomonadales Pseudomonadaceae *Pseudomonas aeruginosa* 2192  
 $\gamma$ -proteobacteria Pseudomonadales Pseudomonadaceae *Pseudomonas aeruginosa* PA7  
 $\gamma$ -proteobacteria Pseudomonadales Pseudomonadaceae *Pseudomonas aeruginosa* PACS2  
 $\gamma$ -proteobacteria Pseudomonadales Pseudomonadaceae *Pseudomonas aeruginosa* PACO1  
 $\gamma$ -proteobacteria Pseudomonadales Pseudomonadaceae *Pseudomonas aeruginosa* UCBPP-PA14  
 $\gamma$ -proteobacteria Pseudomonadales Pseudomonadaceae *Pseudomonas entomophila* L48  
 $\gamma$ -proteobacteria Pseudomonadales Pseudomonadaceae *Pseudomonas fluorescens* Pf-5  
 $\gamma$ -proteobacteria Pseudomonadales Pseudomonadaceae *Pseudomonas fluorescens* PfO-1  
 $\gamma$ -proteobacteria Pseudomonadales Pseudomonadaceae *Pseudomonas putida* F1  
 $\gamma$ -proteobacteria Pseudomonadales Pseudomonadaceae *Pseudomonas putida* KT2440  
 $\gamma$ -proteobacteria Pseudomonadales Pseudomonadaceae *Pseudomonas syringae pv. phaseolicola* 1448A  
 $\gamma$ -proteobacteria Pseudomonadales Pseudomonadaceae *Pseudomonas syringae pv. syringae* B728a  
 $\gamma$ -proteobacteria Pseudomonadales Pseudomonadaceae *Pseudomonas syringae pv. tomato str.* DC3000  
 $\gamma$ -proteobacteria Xanthomonadales Xanthomonadaceae *Xanthomonas axonopodis pv. citri str.* 306

Xca-1-1 to Xca-1-1  $\gamma$ -proteobacteria Xanthomonadales Xanthomonadaceae *Xanthomonas campestris* pv. *campestris* str. 8004  
 Xca-2-1 to Xca-2-1  $\gamma$ -proteobacteria Xanthomonadales Xanthomonadaceae *Xanthomonas campestris* pv. *campestris* str. ATCC 33913  
 Xca-3-1 to Xca-3-1  $\gamma$ -proteobacteria Xanthomonadales Xanthomonadaceae *Xanthomonas campestris* pv. *vesicatoria* str. 85-10  
 env-1 environmental sample

| abbrev               | RefSeq accession  |   | 5' at   | 3' at   | genes                                                                                                                       |
|----------------------|-------------------|---|---------|---------|-----------------------------------------------------------------------------------------------------------------------------|
| Pen-1-1              | NC_008027.1       | + | 5348235 | 5348364 | RNA→ <b>ahcY</b> (pfam05221) → <b>metF</b> (cd00537) →                                                                      |
| Ppu-2-1              | NC_002947.3       | + | 5667861 | 5667990 | RNA→ <b>metF</b> (cd00537) →                                                                                                |
| Ppu-1-1              | NZ_AALM01000081.1 | - | 12364   | 12235   | RNA→ <b>ahcY</b> (pfam05221) → <b>metF</b> (cd00537) →                                                                      |
| Pfl-2-1              | NC_007492.1       | + | 5940635 | 5940768 | RNA→ <b>ahcY</b> (pfam05221) → <b>metF</b> (cd00537) →                                                                      |
| Avi-1-1              | NZ_AAAU03000001.1 | + | 1647262 | 1647384 | RNA→ <b>ahcY</b> (pfam05221) →                                                                                              |
| <sup>2</sup> env-1   | AACY01215322.1    | + | 598     | 726     | RNA→                                                                                                                        |
| Pfl-1-1              | NC_004129.6       | + | 6604857 | 6604997 | RNA→ <b>ahcY</b> (pfam05221) → <b>metF</b> (cd00537) →                                                                      |
| Psy-3-1              | NC_004578.1       | + | 5771299 | 5771444 | RNA→ <b>ahcY</b> (pfam05221) → <b>metF</b> (cd00537) →                                                                      |
| Psy-1-1              | NC_005773.3       | - | 515378  | 515232  | RNA→ <b>ahcY</b> (pfam05221) → <b>metF</b> (cd00537) →                                                                      |
| Psy-2-1              | NC_007005.1       | - | 499730  | 499584  | RNA→ <b>ahcY</b> (pfam05221) → <b>metF</b> (cd00537) →                                                                      |
| Pae-4-1              | NC_002516.2       | - | 484250  | 484110  | RNA→ <b>ahcY</b> (pfam05221) → hypo → <b>metF</b> (cd00537) →                                                               |
| Pae-5-1              | NZ_AABQ07000003.1 | - | 719407  | 719267  | RNA→ <b>ahcY</b> (pfam05221) → COG0317: Guanosine polyphosphate pyrophosphohydrolases/synthetases → <b>metF</b> (cd00537) → |
| Pae-1-1              | NZ_AAKW01000056.1 | - | 2066    | 1926    | RNA→ <b>ahcY</b> (pfam05221) → COG4120 (COG4120) →                                                                          |
| Pae-2-1              | NZ_AAQE01000015.1 | + | 59340   | 59480   | RNA→ <b>ahcY</b> (pfam05221) → hypo → <b>metF</b> (cd00537) →                                                               |
| Pae-3-1              | NZ_AAQW01000001.1 | - | 473183  | 473043  | RNA→ <b>ahcY</b> (pfam05221) → hypo → <b>metF</b> (cd00537) →                                                               |
| <sup>1</sup> Fsp-1-1 | NZ_AAI01000057.1  | + | 13972   | 14079   | RNA→ MetH (COG0646)MetH (COG1410) →                                                                                         |
| Aeh-1-1              | NZ_AALK01000011.1 | + | 76189   | 76296   | RNA→ <b>ahcY</b> (pfam05221) →                                                                                              |
| Mca-1-1              | NC_002977.6       | - | 144286  | 144123  | RNA→ <b>ahcY</b> (pfam05221) → <b>metF</b> (cd00537) →                                                                      |
| Xax-1-1              | NC_003919.1       | - | 955589  | 955419  | RNA→ <b>ahcY</b> (pfam05221) →                                                                                              |
| Xca-3-1              | NC_007508.1       | - | 977044  | 976874  | RNA→ <b>ahcY</b> (pfam05221) →                                                                                              |
| Xca-1-1              | NC_007086.1       | + | 4140239 | 4140408 | RNA→ <b>ahcY</b> (pfam05221) →                                                                                              |
| Xca-2-1              | NC_003902.1       | - | 900313  | 900144  | RNA→ <b>ahcY</b> (pfam05221) →                                                                                              |
| Bth-1-1              | NC_007651.1       | - | 3610424 | 3610238 | RNA→ <b>ahcY</b> (pfam05221) → COG1950 (COG1950) → <b>metF</b> (cd00537) →                                                  |
| Bps-8-1              | NC_006350.1       | - | 3907874 | 3907688 | RNA→ <b>ahcY</b> (pfam05221) → COG1950 (COG1950) → <b>metF</b> (cd00537) →                                                  |
| Bps-5-1              | NC_007434.1       | - | 62272   | 62086   | RNA→ <b>ahcY</b> (pfam05221) → COG1950 (COG1950) → <b>metF</b> (cd00537) →                                                  |
| Bps-4-1              | NZ_AAHS02000077.1 | - | 8493    | 8307    | RNA→ <b>ahcY</b> (pfam05221) → COG1950 (COG1950) → <b>metF</b> (cd00537) →                                                  |
| Bps-7-1              | NZ_AAHU01000007.1 | - | 30106   | 29920   | RNA→ <b>ahcY</b> (pfam05221) → COG1950 (COG1950) → <b>metF</b> (cd00537) →                                                  |
| Bps-10-1             | NZ_AAHW02000049.1 | - | 30124   | 29938   | RNA→ <b>ahcY</b> (pfam05221) → COG1950 (COG1950) → <b>metF</b> (cd00537) →                                                  |
| Bma-4-1              | NC_006348.1       | - | 2934899 | 2934713 | RNA→ <b>ahcY</b> (pfam05221) → COG1950 (COG1950) → <b>metF</b> (cd00537) →                                                  |
| Bma-1-1              | NZ_AAHM02000001.1 | + | 1743003 | 1743189 | RNA→ <b>ahcY</b> (pfam05221) → COG1950 (COG1950) → <b>metF</b> (cd00537) →                                                  |
| Bma-2-1              | NZ_AAHN02000009.1 | - | 203964  | 203778  | RNA→ <b>ahcY</b> (pfam05221) → COG1950 (COG1950) → <b>metF</b> (cd00537) →                                                  |
| Bma-6-1              | NZ_AAHO01000086.1 | - | 8024    | 7838    | RNA→ <b>ahcY</b> (pfam05221) → COG1950 (COG1950) → <b>metF</b> (cd00537) →                                                  |
| Bma-8-1              | NZ_AAHP01000058.1 | - | 14197   | 14011   | RNA→ <b>ahcY</b> (pfam05221) → COG1950 (COG1950) → <b>metF</b> (cd00537) →                                                  |
| Bma-9-1              | NZ_AAHQ02000003.1 | - | 219660  | 219474  | RNA→ <b>ahcY</b> (pfam05221) → COG1950 (COG1950) → <b>metF</b> (cd00537) →                                                  |
| Bps-3-1              | NZ_AAHR02000057.1 | - | 29952   | 29766   | RNA→ <b>ahcY</b> (pfam05221) → COG1950 (COG1950) → <b>metF</b> (cd00537) →                                                  |





**abbrev. of hits**

**taxonomy of species**

|                      |                                             |                                                       |
|----------------------|---------------------------------------------|-------------------------------------------------------|
| Lla-1-1 to Lla-1-1   | Firmicutes Lactobacillales Streptococcaceae | <i>Lactococcus lactis</i> subsp. <i>lactis</i> II1403 |
| Sag-1-1 to Sag-1-1   | Firmicutes Lactobacillales Streptococcaceae | <i>Streptococcus agalactiae</i> 18RS21                |
| Sag-2-1 to Sag-2-1   | Firmicutes Lactobacillales Streptococcaceae | <i>Streptococcus agalactiae</i> 2603V/R               |
| Sag-3-1 to Sag-3-1   | Firmicutes Lactobacillales Streptococcaceae | <i>Streptococcus agalactiae</i> 515                   |
| Sag-4-1 to Sag-4-1   | Firmicutes Lactobacillales Streptococcaceae | <i>Streptococcus agalactiae</i> A909                  |
| Sag-5-1 to Sag-5-1   | Firmicutes Lactobacillales Streptococcaceae | <i>Streptococcus agalactiae</i> CJB111                |
| Sag-6-1 to Sag-6-1   | Firmicutes Lactobacillales Streptococcaceae | <i>Streptococcus agalactiae</i> COH1                  |
| Sag-7-1 to Sag-7-1   | Firmicutes Lactobacillales Streptococcaceae | <i>Streptococcus agalactiae</i> H36B                  |
| Sag-8-1 to Sag-8-1   | Firmicutes Lactobacillales Streptococcaceae | <i>Streptococcus agalactiae</i> NEM316                |
| Smu-1-1 to Smu-1-1   | Firmicutes Lactobacillales Streptococcaceae | <i>Streptococcus mutans</i> UA159                     |
| Spn-1-1 to Spn-1-1   | Firmicutes Lactobacillales Streptococcaceae | <i>Streptococcus pneumoniae</i> R6                    |
| Spn-2-1 to Spn-2-2   | Firmicutes Lactobacillales Streptococcaceae | <i>Streptococcus pneumoniae</i> TIGR4                 |
| Spy-1-1 to Spy-1-1   | Firmicutes Lactobacillales Streptococcaceae | <i>Streptococcus pyogenes</i> M1 GAS                  |
| Spy-2-1 to Spy-2-1   | Firmicutes Lactobacillales Streptococcaceae | <i>Streptococcus pyogenes</i> M49 591                 |
| Spy-3-1 to Spy-3-1   | Firmicutes Lactobacillales Streptococcaceae | <i>Streptococcus pyogenes</i> MGAS10270               |
| Spy-4-1 to Spy-4-1   | Firmicutes Lactobacillales Streptococcaceae | <i>Streptococcus pyogenes</i> MGAS10394               |
| Spy-5-1 to Spy-5-1   | Firmicutes Lactobacillales Streptococcaceae | <i>Streptococcus pyogenes</i> MGAS10750               |
| Spy-6-1 to Spy-6-1   | Firmicutes Lactobacillales Streptococcaceae | <i>Streptococcus pyogenes</i> MGAS2096                |
| Spy-7-1 to Spy-7-1   | Firmicutes Lactobacillales Streptococcaceae | <i>Streptococcus pyogenes</i> MGAS5005                |
| Spy-8-1 to Spy-8-1   | Firmicutes Lactobacillales Streptococcaceae | <i>Streptococcus pyogenes</i> MGAS6180                |
| Spy-9-1 to Spy-9-1   | Firmicutes Lactobacillales Streptococcaceae | <i>Streptococcus pyogenes</i> MGAS8232                |
| Spy-10-1 to Spy-10-1 | Firmicutes Lactobacillales Streptococcaceae | <i>Streptococcus pyogenes</i> MGAS9429                |

| abbrev               | RefSeq accession  |   | 5' at   | 3' at   | genes                                |
|----------------------|-------------------|---|---------|---------|--------------------------------------|
| Spy-4-1              | NC.006086.1       | + | 587336  | 587498  | RNA → COG4708 (COG4708) →            |
| Spy-7-1              | NC.007297.1       | + | 571458  | 571620  | RNA → COG4708 (COG4708) →            |
| Spy-8-1              | NC.007296.1       | + | 569292  | 569454  | RNA → COG4708 (COG4708) →            |
| Spy-10-1             | NC.008021.1       | + | 609013  | 609175  | RNA → COG4708 (COG4708) →            |
| Spy-3-1              | NC.008022.1       | + | 602440  | 602602  | RNA → COG4708 (COG4708) →            |
| Spy-6-1              | NC.008023.1       | + | 610421  | 610583  | RNA → COG4708 (COG4708) →            |
| Spy-5-1              | NC.008024.1       | + | 629301  | 629463  | RNA → COG4708 (COG4708) →            |
| Spy-1-1              | NC.002737.1       | + | 610434  | 610596  | RNA → COG4708 (COG4708) →            |
| Spy-9-1              | NC.003485.1       | + | 649988  | 650150  | RNA → COG4708 (COG4708) →            |
| Spy-2-1              | NZ.AAFV01000127.1 | + | 2701    | 2863    | RNA → COG4708 (COG4708) →            |
| Sag-4-1              | NC.007432.1       | + | 925396  | 925551  | RNA → COG4708 (COG4708) →            |
| Sag-2-1              | NC.004116.1       | + | 847184  | 847339  | RNA → COG4708 (COG4708) →            |
| Sag-8-1              | NC.004368.1       | + | 891258  | 891413  | RNA → COG4708 (COG4708) →            |
| Sag-1-1              | NZ.AAJO01000019.1 | - | 14506   | 14351   | RNA → COG4708 (COG4708) →            |
| Sag-3-1              | NZ.AAJP01000038.1 | - | 19582   | 19427   | RNA → COG4708 (COG4708) →            |
| Sag-5-1              | NZ.AAJQ01000003.1 | - | 48527   | 48372   | RNA → COG4708 (COG4708) →            |
| Sag-7-1              | NZ.AAJS01000011.1 | - | 5688    | 5533    | RNA → COG4708 (COG4708) →            |
| Sag-6-1              | NZ.AAJR01000052.1 | + | 12937   | 13092   | RNA → COG4708 (COG4708) →            |
| Spn-2-1              | NC.003028.1       | + | 955901  | 956039  | RNA → COG4708 (COG4708) → tRNA-Thr → |
| Spn-1-1              | NC.003098.1       | + | 904161  | 904299  | RNA → COG4708 (COG4708) → tRNA-Thr → |
| Spn-2-2              | NZ.AAGY02000049.1 | + | 9540    | 9678    | RNA → COG4708 (COG4708) →            |
| Smu-1-1              | NC.004350.1       | - | 1474191 | 1474053 | RNA → COG4708 (COG4708) →            |
| <sup>1</sup> Lla-1-1 | NC.002662.1       | + | 802553  | 802700  | RNA → COG4708 (COG4708) →            |

```

YP_329594.1          -----MNTFTTRDYAHMAIVTAIYIVLTITPPFNAIAYGAYQFRVSEMLNFLAFYHRKYLFAVTLGCMIS...
ZP_00786020.1       -----MNTFTTRDYAHMAIVTAIYIVLTITPPFNAIAYGAYQFRVSEMLNFLAFYHRKYLFAVTLGCMIS...
YP_059907.1         -----MTKLTVDHYVHIGLVAALYVVLITPPLNAIYSYGMQFRISEMMLNFLAFYHRKYIIAVTLGCMIAN...
NP_721887.1         -----MKQLTVRDLAHIAIVAALYVALTATPPLNAISYGGIQFRLSEMLNFLAFYNPKYIIAVTLGCMIAN...
NP_345488.1         -----MKKLTIRVDADIAIVAALYVVLTVTPPLNAISYGAYQFRISEMMLNFMAYNPKYIIIGVTIGCMIAN...
NP_266951.1-extra5  MSLHPFAQAYYRILSPKENLLKSKTYDIVTIAIVAALYVILTMTPGLSAISYGPIQFRVSEMLNFTAFFNKKYIIAVTI
: : :                ::      :..  . * . :.:*:*:* ** ** :.*:*  **:*:*:* ** :.*:*:*:*:*

```

Figure 3: Alignment of COG4708 proteins

**COG4708** Predicted membrane protein [Function unknown]

Duplicate sequences: the following putative homologs are not shown in the alignment because their sequences are identical to a homolog already shown: Sag-1-1, Sag-2-1, Sag-3-1, Sag-5-1, Sag-7-1, Sag-8-1, Spn-1-1, Spn-2-2, Spy-1-1, Spy-10-1, Spy-2-1, Spy-3-1, Spy-5-1, Spy-6-1, Spy-7-1, Spy-8-1, Spy-9-1

alignment positions 1...160

```

Spy-4-1  UGUUUUAUGGUAACAAUGUAACCGUUGC...UUU...G.CAAC.CCUUGGUCUUAGUUCCUUUCACCAAGCAUAUUAGAAACGUAGUAGCUUUUGA.GAGU.UAUCCAGACGUU.AAAGGAAAAA.AUGACAAAAUUGACUGUACACGACUAUG
Sag-4-1  UGUGAUUA...CUUAGUA...GUUGU...UUUAC...A.CAAC.CCUUGAUGCUUAGUUCCUUUCACCAAGCAUAUUACAACGUU.AGAAGUGU.A..ACUAUCU...AAACGUU.AAAGGAAAAU.AUGAACACAUUUACAACUCGCGAUUACG
Sag-6-1  UGUGAUUA...CUUAGUA...GUUGU...UUUAC...A.CAAC.CCUUGAUGCUUAGUUCCUUUCACCAAGCAUAUUACAACGUU.AGAAGUGU.A..ACUGUCU...AAACGUU.AAAGGAAAAU.AUGAACACAUUUACAACUCGCGAUUACG
Spn-2-1  UGUGCUAUA...CU.AGUAA.GUUGA...AUGAA...U.CAAC.CCUUGGUCUUAGCUU.UUUCACCAAGCAUAUUACACGCGG...AU.A...ACCGCC.AAAGGAAAAAG.AUGAAAAAUUAACUAUUCGUGAUGUUG
Smu-1-1  UAUGCUAUA...CUGGAUA...GUUGU...CUG...A.CAAC.CCUUGGUCUUAAUUCCUUUCACCAAGCAUAUUACAACCGU...AGAU...CGUU.AAAGGAAAACA.AUGAAACAACUAACUGUUCGUGAUUUAG
Lla-1-1  UCUGCUAAA...AU.AAAAAC.GUUGCUCAUAG.UGAGUAAC.CCUUGAGCCUUCCAUCGU.UUGCUCAAGCAUAUUUAUAGCGGA...UU.U...UGUCGCG.AAAGGAAAACCUUUUGAAAAAACAACUAUGUAUUG
...<<<<<<...>>>>...<<<<<<...>>>>>...<<<<...<<<<<...>>>...>>>>...
...00012000...0002.1000...0000222...2220000...?2002...020120...021.020...2002?...
...<<<<<<...>>>>...>>>...
...112100...00212...11...
URUGYUAUA--CUoRUAAo-GUUGY---oUo---R-CAC-CCUUGRUGCUUARUUCCCUUUCYCAAGCAUUA1YARCGo---oUo---oRoCGYY-AAAGGAGAAo--AUGAAAAAAAUURAcRoRYUoRYGAUo•YG
SD+++ AUG

```

alignment positions 161...177

```

Spy-4-1  UUCACAUGGGCUAGUA
Sag-4-1  CUCACAUGGCUAUUGUA
Sag-6-1  CUCACAUGGCUAUUGUA
Spn-2-1  CAGAUAAUGCAAUCGUC
Smu-1-1  CCCAUAUCCGAUUGUG
Lla-1-1  UUAACAUCGCAAUUGU
.....
.....
.....
.....
YV•AYAU1GC•AUYGU•

```

2.3.1 Annotation of start codon in COG4708 genes

To demonstrate the plausibility of our start codon annotation, we extracted the downstream proteins of these sequences and aligned them with CLUSTALW [13]; see Figure 3 (page 39). We show the N-terminal portion (i.e., 5' portion, in nucleotide terms) of the protein. This alignment demonstrates (1) that the start codon we annotated is more likely to be correct, given the unaligned 5' region, and (2) that the aligned part of the

## 2.4 The *sucA* motif

The genes downstream of the RNA are all annotated (in some cases) as members of the *suc* operon. We therefore suspect that they are transcribed as a unit, and annotated them as such. Recall that our automated operon prediction scheme was simply to assume that any gap of more than 100 nucleotides would end an operon. Some genes downstream of *sucA* RNA have gaps above 100 nucleotides, so would not by default be shown together. *sucA*, *aceF*, *lpd* and COG1485 (putative ATPase) are conserved in the same order in all species with *sucA* RNA, although gap lengths

sequences (corresponding with our annotated start codon) appears to be a conserved coding region, even though the N-terminal part is less well conserved, particularly at the nucleotide level. We note again that both the annotated start codon and our start codon in NP\_266951 are UUG, so this does not make one prediction more likely to be correct than the other.

vary.

There is a possible homolog in *Dechloromonas aromatica* in sequence NC\_007298.1 from nucleotides 3080843 to 3080715. This sequence folds into a similar structure, with a much longer P1 loop and largely lacking P4 stems, but we were unconvinced by the homology, particularly at the sequence level. As well, it was assigned a marginal E-value even in a search confined to *sucA* UTRs within  $\beta$ -proteobacteria only.

Notes:

<sup>1</sup> Overlaps hypothetical gene, but the gene is not conserved in any bacteria.

<sup>2</sup> These sequences come from the Global Ocean Survey [12], and were downloaded from the CAMERA site at <http://camera.calit2.net/> related to CAMERA identifier CAM.PUB.Rusch07a.

<sup>3</sup> This sequence is derived from samples obtained from an estuary in Delaware Bay, New Jersey, USA.

<sup>4</sup> This sequence is derived from samples obtained from an estuary in Chesapeake Bay, Maryland, USA.

<sup>5</sup> This sequence is derived from samples obtained from a hypersaline lagoon at Punta Cormorant in Floreana Island, Ecuador.

<sup>6</sup> This sequence is derived from samples obtained from Lake Gatún in Panama.

<sup>7</sup> This genetic information downloaded from <http://camera.calit2.net> may be considered to be part of the genetic patrimony of the country from which the sample was obtained. Users of this information agree to: (1) acknowledge the country of origin in any publications where the genetic information is presented and (2) contact the CBD focal point identified on the CBD website (<http://www.biodiv.org/doc/info-centre.shtml>) if they intend to use the genetic information for commercial purposes.



**abbrev. of hits**

Bbr-1-1 to Bbr-1-1  
 Bpa-1-1 to Bpa-1-1  
 Bpe-1-1 to Bpe-1-1  
 Bam-1-1 to Bam-1-1  
 Bce-1-1 to Bce-1-1  
 Bdo-1-1 to Bdo-1-1  
 Bsp-1-1 to Bsp-1-1  
 Bvi-1-1 to Bvi-1-1  
 Bma-1-1 to Bma-1-1  
 Bma-2-1 to Bma-2-1  
 Bma-3-1 to Bma-3-1  
 Bma-4-1 to Bma-4-1  
 Bma-5-1 to Bma-5-1  
 Bma-6-1 to Bma-6-1  
 Bma-7-1 to Bma-7-1  
 Bma-8-1 to Bma-8-1  
 Bma-9-1 to Bma-9-1  
 Bxe-1-1 to Bxe-1-1  
 Bps-1-1 to Bps-1-1  
 Bps-2-1 to Bps-2-1  
 Bps-3-1 to Bps-3-1  
 Bps-4-1 to Bps-4-1  
 Bps-5-1 to Bps-5-1  
 Bps-6-1 to Bps-6-1  
 Bps-7-1 to Bps-7-1  
 Bps-8-1 to Bps-8-1  
 Bps-9-1 to Bps-9-1  
 Bps-10-1 to Bps-10-1  
 Bth-1-1 to Bth-1-1  
 Reu-1-1 to Reu-1-1  
 Reu-2-1 to Reu-2-1  
 Rme-1-1 to Rme-1-1  
 Rso-1-1 to Rso-1-1  
 Rso-2-1 to Rso-2-1  
 Aav-1-1 to Aav-1-1  
 Asp-1-1 to Asp-1-1  
 Pna-1-1 to Pna-1-1  
 Psp-1-1 to Psp-1-1  
 Rfe-1-1 to Rfe-1-1  
 Vei-1-1 to Vei-1-1  
 Rge-1-1 to Rge-1-1  
 env-1 to env-7

**taxonomy of species**

$\beta$ -proteobacteria Burkholderiales Alcaligenaceae *Bordetella bronchiseptica* RB50  
 $\beta$ -proteobacteria Burkholderiales Alcaligenaceae *Bordetella parapertussis* 12822  
 $\beta$ -proteobacteria Burkholderiales Alcaligenaceae *Bordetella pertussis* Tohama I  
 $\beta$ -proteobacteria Burkholderiales Burkholderiaceae Burkholderia Burkholderia cepacia complex *Burkholderia ambifaria* AMMD  
 $\beta$ -proteobacteria Burkholderiales Burkholderiaceae Burkholderia Burkholderia cepacia complex *Burkholderia cenocepacia* PC184  
 $\beta$ -proteobacteria Burkholderiales Burkholderiaceae Burkholderia Burkholderia cepacia complex *Burkholderia dolosa* AUO158  
 $\beta$ -proteobacteria Burkholderiales Burkholderiaceae Burkholderia Burkholderia cepacia complex *Burkholderia* sp. 383  
 $\beta$ -proteobacteria Burkholderiales Burkholderiaceae Burkholderia Burkholderia cepacia complex *Burkholderia vietnamiensis* G4  
 $\beta$ -proteobacteria Burkholderiales Burkholderiaceae *Burkholderia mallei* 10229  
 $\beta$ -proteobacteria Burkholderiales Burkholderiaceae *Burkholderia mallei* 10399  
 $\beta$ -proteobacteria Burkholderiales Burkholderiaceae *Burkholderia mallei* 2002721280  
 $\beta$ -proteobacteria Burkholderiales Burkholderiaceae *Burkholderia mallei* ATCC 23344  
 $\beta$ -proteobacteria Burkholderiales Burkholderiaceae *Burkholderia mallei* FMH  
 $\beta$ -proteobacteria Burkholderiales Burkholderiaceae *Burkholderia mallei* GB8 horse 4  
 $\beta$ -proteobacteria Burkholderiales Burkholderiaceae *Burkholderia mallei* JHU  
 $\beta$ -proteobacteria Burkholderiales Burkholderiaceae *Burkholderia mallei* NCTC 10247  
 $\beta$ -proteobacteria Burkholderiales Burkholderiaceae *Burkholderia mallei* SAVP1  
 $\beta$ -proteobacteria Burkholderiales Burkholderiaceae *Burkholderia xenovorans* LB400  
 $\beta$ -proteobacteria Burkholderiales Burkholderiaceae Burkholderia pseudomallei group *Burkholderia pseudomallei* 1106a  
 $\beta$ -proteobacteria Burkholderiales Burkholderiaceae Burkholderia pseudomallei group *Burkholderia pseudomallei* 1106b  
 $\beta$ -proteobacteria Burkholderiales Burkholderiaceae Burkholderia pseudomallei group *Burkholderia pseudomallei* 1655  
 $\beta$ -proteobacteria Burkholderiales Burkholderiaceae Burkholderia pseudomallei group *Burkholderia pseudomallei* 1710a  
 $\beta$ -proteobacteria Burkholderiales Burkholderiaceae Burkholderia pseudomallei group *Burkholderia pseudomallei* 1710b  
 $\beta$ -proteobacteria Burkholderiales Burkholderiaceae Burkholderia pseudomallei group *Burkholderia pseudomallei* 406e  
 $\beta$ -proteobacteria Burkholderiales Burkholderiaceae Burkholderia pseudomallei group *Burkholderia pseudomallei* 668  
 $\beta$ -proteobacteria Burkholderiales Burkholderiaceae Burkholderia pseudomallei group *Burkholderia pseudomallei* K96243  
 $\beta$ -proteobacteria Burkholderiales Burkholderiaceae Burkholderia pseudomallei group *Burkholderia pseudomallei* Pasteur  
 $\beta$ -proteobacteria Burkholderiales Burkholderiaceae Burkholderia pseudomallei group *Burkholderia pseudomallei* S13  
 $\beta$ -proteobacteria Burkholderiales Burkholderiaceae Burkholderia pseudomallei group *Burkholderia thailandensis* E264  
 $\beta$ -proteobacteria Burkholderiales Burkholderiaceae Cupriavidus *Ralstonia eutropha* H16  
 $\beta$ -proteobacteria Burkholderiales Burkholderiaceae Cupriavidus *Ralstonia eutropha* JMP134  
 $\beta$ -proteobacteria Burkholderiales Burkholderiaceae Cupriavidus *Ralstonia metallidurans* CH34  
 $\beta$ -proteobacteria Burkholderiales Burkholderiaceae *Ralstonia solanacearum* GM1000  
 $\beta$ -proteobacteria Burkholderiales Burkholderiaceae *Ralstonia solanacearum* UW551  
 $\beta$ -proteobacteria Burkholderiales Comamonadaceae *Acidovorax avenae* subsp. *citrulli* AAC00-1  
 $\beta$ -proteobacteria Burkholderiales Comamonadaceae *Acidovorax* sp. JS42  
 $\beta$ -proteobacteria Burkholderiales Comamonadaceae *Polaromonas naphthalenivorans* CJ2  
 $\beta$ -proteobacteria Burkholderiales Comamonadaceae *Polaromonas* sp. JS666  
 $\beta$ -proteobacteria Burkholderiales Comamonadaceae *Rhodoferax ferrireducens* T118  
 $\beta$ -proteobacteria Burkholderiales Comamonadaceae *Verminephrobacter eiseniae* EF01-2  
 $\beta$ -proteobacteria Burkholderiales *Rubrivivax gelatinosus* PM1  
 environmental samples

| abbrev                 | RefSeq accession        | 5' at | 3' at           | genes                                                                                             |
|------------------------|-------------------------|-------|-----------------|---------------------------------------------------------------------------------------------------|
| <sup>2,3</sup> env-1   | JCVL_SCAF_1101668124968 | -     | 170 84          | RNA →                                                                                             |
| Vei-1-1                | NZ_AASQ01000011.1       | -     | 66218 66123     | RNA → SucA (COG0567) → SucB/AceF (COG0508) → Lpd (COG1249) → COG1485 (COG1485) →                  |
| Aav-1-1                | NZ_AASX01000003.1       | -     | 235516 235421   | RNA → SucA (COG0567) → SucB/AceF (COG0508) → Lpd (COG1249) → COG1485 (COG1485) →                  |
| env-2                  | AACY01261444.1          | -     | 619 533         | RNA → unknown →                                                                                   |
| Asp-1-1                | NZ_AASD01000010.1       | -     | 45337 45242     | RNA → SucA (COG0567) → SucB/AceF (COG0508) → Lpd (COG1249) → COG1485 (COG1485) →                  |
| <sup>2,5,7</sup> env-3 | JCVL_SCAF_1096627140354 | -     | 957 870         | RNA →                                                                                             |
| Rfe-1-1                | NC_007908.1             | -     | 2549152 2549046 | RNA → SucA (COG0567) → SucB/AceF (COG0508) → Lpd (COG1249) → COG1485 (COG1485) →                  |
| Pna-1-1                | NZ_AANM01000006.1       | -     | 135596 135492   | RNA → SucA (COG0567) → SucB/AceF (COG0508) → Lpd (COG1249) → COG1485 (COG1485) →                  |
| Psp-1-1                | NC_007948.1             | -     | 2758692 2758588 | RNA → SucA (COG0567) → SucB/AceF (COG0508) → Lpd (COG1249) → COG1485 (COG1485) →                  |
| <sup>2,4</sup> env-4   | JCVL_SCAF_1096627456667 | +     | 900 988         | RNA →                                                                                             |
| Rge-1-1                | NZ_AAEM01000001.1       | +     | 683107 683203   | RNA → SucA (COG0567) → SucB/AceF (COG0508) → EmrE (COG2076) → Lpd (COG1249) → COG1485 (COG1485) → |
| Reu-2-1                | NC_007347.1             | -     | 2250080 2249984 | RNA → SucA (COG0567) → SucB/AceF (COG0508) → Lpd (COG1249) → COG1485 (COG1485) →                  |
| Reu-1-1                | NC_008313.1             | -     | 2524712 2524616 | RNA → SucA (COG0567) → SucB/AceF (COG0508) → Lpd (COG1249) → COG1485 (COG1485) →                  |
| Rme-1-1                | NC_007973.1             | -     | 2222411 2222315 | RNA → SucA (COG0567) → SucB/AceF (COG0508) → Lpd (COG1249) → COG1485 (COG1485) →                  |
| Rso-1-1                | NC_003295.1             | +     | 1348529 1348625 | RNA → SucA (COG0567) → SucB/AceF (COG0508) → Lpd (COG1249) → COG1485 (COG1485) →                  |
| Rso-2-1                | NZ_AAKL01000042.1       | -     | 24703 24608     | RNA → SucA (COG0567) → SucB/AceF (COG0508) → Lpd (COG1249) → COG1485 (COG1485) →                  |
| Bsp-1-1                | NC_007510.1             | +     | 1635427 1635523 | RNA → SucA (COG0567) → SucB/AceF (COG0508) → Lpd (COG1249) → COG1485 (COG1485) →                  |
| Bce-1-1                | NZ_AAKX01000009.1       | -     | 11093 10997     | RNA → SucA (COG0567) → 2-oxoacid_dh (COG0508) → Lpd (COG1249) → COG1485 (COG1485) →               |
| <sup>1</sup> Bvi-1-1   | NZ_AAEH02000086.1       | -     | 11737 11641     | RNA → SucA (COG0567) → SucB/AceF (COG0508) →                                                      |
| Bam-1-1                | NZ_AAJL01000003.1       | -     | 480235 480139   | RNA → SucA (COG0567) → SucB/AceF (COG0508) → Lpd (COG1249) → COG1485 (COG1485) →                  |
| Bth-1-1                | NC_007651.1             | -     | 2917736 2917640 | RNA → SucA (COG0567) → SucB/AceF (COG0508) → Lpd (COG1249) → COG1485 (COG1485) →                  |
| Bps-8-1                | NC_006350.1             | -     | 2274711 2274615 | RNA → SucA (COG0567) → SucB/AceF (COG0508) → Lpd (COG1249) → COG1485 (COG1485) →                  |
| Bps-5-1                | NC_007434.1             | +     | 2098508 2098604 | RNA → SucA (COG0567) → SucB/AceF (COG0508) → Lpd (COG1249) → COG1485 (COG1485) →                  |
| Bma-4-1                | NC_006348.1             | -     | 1100353 1100257 | RNA → SucA (COG0567) → SucB/AceF (COG0508) → Lpd (COG1249) → COG1485 (COG1485) →                  |
| Bma-1-1                | NZ_AAHM02000001.1       | -     | 176237 176141   | RNA → SucA (COG0567) → SucB/AceF (COG0508) → Lpd (COG1249) → COG1485 (COG1485) →                  |
| Bma-2-1                | NZ_AAHN02000001.1       | +     | 184426 184522   | RNA → SucA (COG0567) → SucB/AceF (COG0508) → Lpd (COG1249) → COG1485 (COG1485) →                  |
| Bma-6-1                | NZ_AAH01000128.1        | -     | 3390 3294       | RNA → SucA (COG0567) →                                                                            |
| Bma-8-1                | NZ_AAHP01000017.1       | +     | 58415 58511     | RNA → SucA (COG0567) → SucB/AceF (COG0508) → Lpd (COG1249) → COG1485 (COG1485) →                  |
| Bma-9-1                | NZ_AAHQ02000001.1       | +     | 1688315 1688411 | RNA → SucA (COG0567) → SucB/AceF (COG0508) → Lpd (COG1249) → COG1485 (COG1485) →                  |
| Bps-3-1                | NZ_AAHR02000071.1       | -     | 20447 20351     | RNA → SucA (COG0567) → SucB/AceF (COG0508) → Lpd (COG1249) → COG1485 (COG1485) →                  |
| Bps-4-1                | NZ_AAHS02000055.1       | +     | 9012 9108       | RNA → SucA (COG0567) → SucB/AceF (COG0508) → Lpd (COG1249) → COG1485 (COG1485) →                  |
| Bps-7-1                | NZ_AAHU01000012.1       | -     | 81715 81619     | RNA → SucA (COG0567) → SucB/AceF (COG0508) → Lpd (COG1249) → COG1485 (COG1485) →                  |
| Bps-9-1                | NZ_AAHV02000071.1       | +     | 10601 10697     | RNA → SucA (COG0567) → SucB/AceF (COG0508) → Lpd (COG1249) → COG1485 (COG1485) →                  |
| Bps-10-1               | NZ_AAHW02000073.1       | +     | 9018 9114       | RNA → SucA (COG0567) → SucB/AceF (COG0508) → Lpd (COG1249) → COG1485 (COG1485) →                  |
| Bma-5-1                | NZ_AAIQ02000028.1       | -     | 46755 46659     | RNA → SucA (COG0567) → SucB/AceF (COG0508) → Lpd (COG1249) → COG1485 (COG1485) →                  |
| Bma-7-1                | NZ_AAIR02000025.1       | -     | 54481 54385     | RNA → SucA (COG0567) → SucB/AceF (COG0508) → Lpd (COG1249) → COG1485 (COG1485) →                  |
| Bps-1-1                | NZ_AAMA01000072.1       | -     | 23180 23084     | RNA → SucA (COG0567) → SucB/AceF (COG0508) → Lpd (COG1249) → COG1485 (COG1485) →                  |
| Bps-2-1                | NZ_AAMB01000040.1       | -     | 23582 23486     | RNA → SucA (COG0567) → SucB/AceF (COG0508) → Lpd (COG1249) → COG1485 (COG1485) →                  |
| Bps-6-1                | NZ_AAMM02000070.1       | -     | 23147 23051     | RNA → SucA (COG0567) → SucB/AceF (COG0508) → Lpd (COG1249) → COG1485 (COG1485) →                  |
| Bma-3-1                | NZ_AANX02000014.1       | -     | 50484 50388     | RNA → SucA (COG0567) → SucB/AceF (COG0508) → Lpd (COG1249) → COG1485 (COG1485) →                  |
| Bdo-1-1                | NZ_AAKY01000089.1       | -     | 10360 10264     | RNA → SucA (COG0567) → 2-oxoacid_dh (COG0508) → Lpd (COG1249) → COG1485 (COG1485) →               |
| Bxe-1-1                | NC_007951.1             | +     | 1834734 1834831 | RNA → SucA (COG0567) → SucB/AceF (COG0508) → Lpd (COG1249) → COG1485 (COG1485) →                  |
| env-5                  | AACY01084698.1          | +     | 1793 1890       | RNA → unknown →                                                                                   |
| <sup>2,6,7</sup> env-6 | JCVL_SCAF_1096627014744 | +     | 1448 1534       | RNA →                                                                                             |
| <sup>2,6,7</sup> env-7 | JCVL_SCAF_1101668234623 | -     | 978 892         | RNA →                                                                                             |
| Bbr-1-1                | NC_002927.3             | -     | 3885643 3885548 | RNA → SucA (COG0567) → SucB/AceF (COG0508) → Lpd (COG1249) → COG1485 (COG1485) →                  |
| Bpa-1-1                | NC_002928.3             | -     | 3469201 3469106 | RNA → SucA (COG0567) → SucB/AceF (COG0508) → Lpd (COG1249) → COG1485 (COG1485) →                  |
| Bpe-1-1                | NC_002929.2             | +     | 1184722 1184817 | RNA → SucA (COG0567) → SucB/AceF (COG0508) → Lpd (COG1249) → COG1485 (COG1485) →                  |



<sup>1</sup> This putative homolog is upstream of two genes on the opposite strand. The next gene,  $\approx$  2.5 Kb downstream, is an annotated rRNA methyltransferase gene, and is on the same strand. Using translated BLAST, we were unable to find any closer gene on the same strand.

Note: this putative homolog was *not* found by looking upstream of rRNA methylase genes.

<sup>2</sup> This putative homolog is near the end of a sequence fragment, so the downstream gene is unknown.

| abbrev. of hits      | taxonomy of species                                                                                  |
|----------------------|------------------------------------------------------------------------------------------------------|
| Efa-1-1 to Efa-1-1   | Firmicutes Lactobacillales Enterococcaceae <i>Enterococcus faecalis</i> V583                         |
| Efa-2-1 to Efa-2-1   | Firmicutes Lactobacillales Enterococcaceae <i>Enterococcus faecium</i> DO                            |
| Lca-1-1 to Lca-1-1   | Firmicutes Lactobacillales Lactobacillaceae <i>Lactobacillus casei</i> ATCC 334                      |
| Lpl-1-1 to Lpl-1-1   | Firmicutes Lactobacillales Lactobacillaceae <i>Lactobacillus plantarum</i> WCFS1                     |
| Lre-1-1 to Lre-1-1   | Firmicutes Lactobacillales Lactobacillaceae <i>Lactobacillus reuteri</i> 100-23                      |
| Lre-2-1 to Lre-2-1   | Firmicutes Lactobacillales Lactobacillaceae <i>Lactobacillus reuteri</i> JCM 1112                    |
| Lsa-1-1 to Lsa-1-1   | Firmicutes Lactobacillales Lactobacillaceae <i>Lactobacillus sakei subsp. sakei</i> 23K              |
| Lsa-2-1 to Lsa-2-1   | Firmicutes Lactobacillales Lactobacillaceae <i>Lactobacillus salivarius subsp. salivarius</i> UCC118 |
| Ppe-1-1 to Ppe-1-1   | Firmicutes Lactobacillales Lactobacillaceae <i>Pediococcus pentosaceus</i> ATCC 25745                |
| Lla-1-1 to Lla-1-1   | Firmicutes Lactobacillales Streptococcaceae <i>Lactococcus lactis subsp. cremoris</i> SK11           |
| Lla-2-1 to Lla-2-1   | Firmicutes Lactobacillales Streptococcaceae <i>Lactococcus lactis subsp. lactis</i> I11403           |
| Sag-1-1 to Sag-1-1   | Firmicutes Lactobacillales Streptococcaceae <i>Streptococcus agalactiae</i> 18RS21                   |
| Sag-2-1 to Sag-2-1   | Firmicutes Lactobacillales Streptococcaceae <i>Streptococcus agalactiae</i> 2603V/R                  |
| Sag-3-1 to Sag-3-1   | Firmicutes Lactobacillales Streptococcaceae <i>Streptococcus agalactiae</i> 515                      |
| Sag-4-1 to Sag-4-1   | Firmicutes Lactobacillales Streptococcaceae <i>Streptococcus agalactiae</i> A909                     |
| Sag-5-1 to Sag-5-1   | Firmicutes Lactobacillales Streptococcaceae <i>Streptococcus agalactiae</i> CJB111                   |
| Sag-6-1 to Sag-6-1   | Firmicutes Lactobacillales Streptococcaceae <i>Streptococcus agalactiae</i> COH1                     |
| Sag-7-1 to Sag-7-1   | Firmicutes Lactobacillales Streptococcaceae <i>Streptococcus agalactiae</i> H36B                     |
| Sag-8-1 to Sag-8-1   | Firmicutes Lactobacillales Streptococcaceae <i>Streptococcus agalactiae</i> NEM316                   |
| Smu-1-1 to Smu-1-1   | Firmicutes Lactobacillales Streptococcaceae <i>Streptococcus mutans</i> UA159                        |
| Spn-1-1 to Spn-1-1   | Firmicutes Lactobacillales Streptococcaceae <i>Streptococcus pneumoniae</i> R6                       |
| Spn-2-1 to Spn-2-2   | Firmicutes Lactobacillales Streptococcaceae <i>Streptococcus pneumoniae</i> TIGR4                    |
| Spy-1-1 to Spy-1-1   | Firmicutes Lactobacillales Streptococcaceae <i>Streptococcus pyogenes</i> M1 GAS                     |
| Spy-2-1 to Spy-2-1   | Firmicutes Lactobacillales Streptococcaceae <i>Streptococcus pyogenes</i> MGAS10270                  |
| Spy-3-1 to Spy-3-1   | Firmicutes Lactobacillales Streptococcaceae <i>Streptococcus pyogenes</i> MGAS10394                  |
| Spy-4-1 to Spy-4-1   | Firmicutes Lactobacillales Streptococcaceae <i>Streptococcus pyogenes</i> MGAS10750                  |
| Spy-5-1 to Spy-5-1   | Firmicutes Lactobacillales Streptococcaceae <i>Streptococcus pyogenes</i> MGAS2096                   |
| Spy-6-1 to Spy-6-1   | Firmicutes Lactobacillales Streptococcaceae <i>Streptococcus pyogenes</i> MGAS315                    |
| Spy-7-1 to Spy-7-1   | Firmicutes Lactobacillales Streptococcaceae <i>Streptococcus pyogenes</i> MGAS5005                   |
| Spy-8-1 to Spy-8-1   | Firmicutes Lactobacillales Streptococcaceae <i>Streptococcus pyogenes</i> MGAS6180                   |
| Spy-9-1 to Spy-9-1   | Firmicutes Lactobacillales Streptococcaceae <i>Streptococcus pyogenes</i> MGAS8232                   |
| Spy-10-1 to Spy-10-1 | Firmicutes Lactobacillales Streptococcaceae <i>Streptococcus pyogenes</i> MGAS9429                   |
| Spy-11-1 to Spy-11-1 | Firmicutes Lactobacillales Streptococcaceae <i>Streptococcus pyogenes</i> SSI-1                      |
| Ssu-1-1 to Ssu-1-1   | Firmicutes Lactobacillales Streptococcaceae <i>Streptococcus suis</i> 89/1591                        |
| Sth-1-1 to Sth-1-1   | Firmicutes Lactobacillales Streptococcaceae <i>Streptococcus thermophilus</i> CNRZ1066               |
| Sth-2-1 to Sth-2-1   | Firmicutes Lactobacillales Streptococcaceae <i>Streptococcus thermophilus</i> LMD-9                  |
| Sth-3-1 to Sth-3-1   | Firmicutes Lactobacillales Streptococcaceae <i>Streptococcus thermophilus</i> LMG 18311              |

| abbrev  | RefSeq accession |   | 5' at  | 3' at  | genes                         |
|---------|------------------|---|--------|--------|-------------------------------|
| Spy-3-1 | NC_006086.1      | + | 348439 | 348550 | RNA → <b>CspR (COG0219)</b> → |

|                      |                   |   |         |         |                                                          |
|----------------------|-------------------|---|---------|---------|----------------------------------------------------------|
| Spy-7-1              | NC_007297.1       | + | 318993  | 319104  | RNA → CspR (COG0219) →                                   |
| Spy-1-1              | NC_002737.1       | + | 318399  | 318510  | RNA → CspR (COG0219) →                                   |
| Spy-8-1              | NC_007296.1       | + | 319891  | 320002  | RNA → CspR (COG0219) →                                   |
| Spy-10-1             | NC_008021.1       | + | 322981  | 323092  | RNA → CspR (COG0219) →                                   |
| Spy-5-1              | NC_008023.1       | + | 323907  | 324018  | RNA → CspR (COG0219) →                                   |
| Spy-4-1              | NC_008024.1       | + | 316889  | 317000  | RNA → CspR (COG0219) →                                   |
| Spy-9-1              | NC_003485.1       | + | 349475  | 349586  | RNA → CspR (COG0219) →                                   |
| Spy-2-1              | NC_008022.1       | + | 320578  | 320689  | RNA → CspR (COG0219) →                                   |
| Spy-11-1             | NC_004606.1       | - | 1587863 | 1587752 | RNA → CspR (COG0219) →                                   |
| Spy-6-1              | NC_004070.1       | + | 308882  | 308993  | RNA → CspR (COG0219) →                                   |
| Sag-5-1              | NZ_AAJO01000051.1 | + | 10437   | 10549   | RNA → CspR (COG0219) →                                   |
| Sag-7-1              | NZ_AAJS01000102.1 | - | 3919    | 3807    | RNA → CspR (COG0219) →                                   |
| Sag-4-1              | NC_007432.1       | - | 1597751 | 1597639 | RNA → CspR (COG0219) →                                   |
| Sag-2-1              | NC_004116.1       | - | 1593794 | 1593682 | RNA → CspR (COG0219) →                                   |
| Sag-8-1              | NC_004368.1       | - | 1698231 | 1698119 | RNA → CspR (COG0219) →                                   |
| Sag-1-1              | NZ_AAJO01000406.1 | + | 289     | 401     | RNA → CspR (COG0219) →                                   |
| Sag-3-1              | NZ_AAJP01000101.1 | - | 3231    | 3119    | RNA → CspR (COG0219) →                                   |
| Sag-6-1              | NZ_AAJR01000063.1 | + | 5861    | 5973    | RNA → CspR (COG0219) →                                   |
| <sup>2</sup> Ssu-1-1 | NZ_AAFA02000101.1 | + | 6262    | 6374    | RNA →                                                    |
| Spn-2-1              | NC_003028.1       | + | 466468  | 466571  | RNA → CspR (COG0219) →                                   |
| Spn-1-1              | NC_003098.1       | + | 432756  | 432859  | RNA → CspR (COG0219) →                                   |
| Spn-2-2              | NZ_AAGY02000109.1 | + | 2700    | 2803    | RNA → CspR (COG0219) →                                   |
| Sth-3-1              | NC_006448.1       | + | 267727  | 267838  | RNA → CspR (COG0219) →                                   |
| Sth-1-1              | NC_006449.1       | + | 267767  | 267878  | RNA → CspR (COG0219) →                                   |
| Sth-2-1              | NZ_AAGS01000063.1 | - | 8014    | 7903    | RNA → CspR (COG0219) →                                   |
| Smu-1-1              | NC_004350.1       | - | 1618054 | 1617939 | RNA → CspR (COG0219) →                                   |
| Lla-2-1              | NC_002662.1       | - | 1162967 | 1162862 | RNA → CspR (COG0219) →                                   |
| Lla-1-1              | NZ_AAGO01000033.1 | - | 788     | 683     | RNA → CspR (COG0219) →                                   |
| Efa-2-1              | NZ_AAAR03000109.1 | + | 25      | 138     | RNA → CspR (COG0219) → GpmB (COG0406) → RecD (COG0507) → |
| Efa-1-1              | NC_004668.1       | - | 2578245 | 2578132 | RNA → CspR (COG0219) →                                   |
| Lsa-1-1              | NC_007576.1       | + | 496014  | 496123  | RNA → CspR (COG0219) → hypo →                            |
| Lca-1-1              | NZ_AAGR01000005.1 | - | 56003   | 55882   | RNA → CspR (COG0219) →                                   |
| <sup>1</sup> Lpl-1-1 | NC_004567.1       | - | 1998562 | 1998450 | RNA →                                                    |
| Lre-2-1              | NZ_AAOV01000032.1 | - | 14837   | 14718   | RNA → CspR (COG0219) → FtsK (COG1674) →                  |
| Lre-1-1              | NZ_AAPZ01000011.1 | - | 46363   | 46244   | RNA → CspR (COG0219) → FtsK (COG1674) →                  |
| Lsa-2-1              | NC_007929.1       | - | 1171104 | 1170996 | RNA → CspR (COG0219) → FtsK (COG1674) →                  |
| Ppe-1-1              | NZ_AAEV01000008.1 | - | 54736   | 54652   | RNA → CspR (COG0219) → FtsK (COG1674) →                  |

**COG0219** Predicted rRNA methylase (SpoU class) [Translation, ribosomal structure and biogenesis] family I member [DNA replication, recombination, and repair]  
**COG1674** DNA segregation ATPase FtsK/SpoIIIE and related proteins [Cell division and chromosome partitioning]  
**COG0406** Fructose-2,6-bisphosphatase [Carbohydrate transport and metabolism]  
**COG0507** ATP-dependent exoDNase (exonuclease V), alpha subunit - helicase super-



|                      |                          |                   |                    |                                                                          |
|----------------------|--------------------------|-------------------|--------------------|--------------------------------------------------------------------------|
| Bma-9-1 to Bma-9-1   | <i>β</i> -proteobacteria | Burkholderiales   | Burkholderiaceae   | <i>Burkholderia mallei</i> SAVP1                                         |
| Bxe-1-1 to Bxe-1-1   | <i>β</i> -proteobacteria | Burkholderiales   | Burkholderiaceae   | <i>Burkholderia xenovorans</i> LB400                                     |
| Bps-1-1 to Bps-1-1   | <i>β</i> -proteobacteria | Burkholderiales   | Burkholderiaceae   | Burkholderia pseudomallei group <i>Burkholderia pseudomallei</i> 1106a   |
| Bps-2-1 to Bps-2-1   | <i>β</i> -proteobacteria | Burkholderiales   | Burkholderiaceae   | Burkholderia pseudomallei group <i>Burkholderia pseudomallei</i> 1106b   |
| Bps-3-1 to Bps-3-1   | <i>β</i> -proteobacteria | Burkholderiales   | Burkholderiaceae   | Burkholderia pseudomallei group <i>Burkholderia pseudomallei</i> 1655    |
| Bps-4-1 to Bps-4-1   | <i>β</i> -proteobacteria | Burkholderiales   | Burkholderiaceae   | Burkholderia pseudomallei group <i>Burkholderia pseudomallei</i> 1710a   |
| Bps-5-1 to Bps-5-1   | <i>β</i> -proteobacteria | Burkholderiales   | Burkholderiaceae   | Burkholderia pseudomallei group <i>Burkholderia pseudomallei</i> 1710b   |
| Bps-6-1 to Bps-6-1   | <i>β</i> -proteobacteria | Burkholderiales   | Burkholderiaceae   | Burkholderia pseudomallei group <i>Burkholderia pseudomallei</i> 406e    |
| Bps-7-1 to Bps-7-1   | <i>β</i> -proteobacteria | Burkholderiales   | Burkholderiaceae   | Burkholderia pseudomallei group <i>Burkholderia pseudomallei</i> 668     |
| Bps-8-1 to Bps-8-1   | <i>β</i> -proteobacteria | Burkholderiales   | Burkholderiaceae   | Burkholderia pseudomallei group <i>Burkholderia pseudomallei</i> K96243  |
| Bps-9-1 to Bps-9-1   | <i>β</i> -proteobacteria | Burkholderiales   | Burkholderiaceae   | Burkholderia pseudomallei group <i>Burkholderia pseudomallei</i> Pasteur |
| Bps-10-1 to Bps-10-1 | <i>β</i> -proteobacteria | Burkholderiales   | Burkholderiaceae   | Burkholderia pseudomallei group <i>Burkholderia pseudomallei</i> S13     |
| Bth-1-1 to Bth-1-1   | <i>β</i> -proteobacteria | Burkholderiales   | Burkholderiaceae   | Burkholderia pseudomallei group <i>Burkholderia thailandensis</i> E264   |
| Reu-1-1 to Reu-1-1   | <i>β</i> -proteobacteria | Burkholderiales   | Burkholderiaceae   | Cupriavidus <i>Ralstonia eutropha</i> H16                                |
| Reu-2-1 to Reu-2-1   | <i>β</i> -proteobacteria | Burkholderiales   | Burkholderiaceae   | Cupriavidus <i>Ralstonia JMP134</i>                                      |
| Rme-1-1 to Rme-1-1   | <i>β</i> -proteobacteria | Burkholderiales   | Burkholderiaceae   | Cupriavidus <i>Ralstonia metallidurans</i> CH34                          |
| Rso-1-1 to Rso-1-1   | <i>β</i> -proteobacteria | Burkholderiales   | Burkholderiaceae   | <i>Ralstonia solanacearum</i> GMI1000                                    |
| Rso-2-1 to Rso-2-1   | <i>β</i> -proteobacteria | Burkholderiales   | Burkholderiaceae   | <i>Ralstonia solanacearum</i> UW551                                      |
| Asp-1-1 to Asp-1-1   | <i>β</i> -proteobacteria | Burkholderiales   | Comamonadaceae     | <i>Acidovorax</i> sp. JS42                                               |
| Pna-1-1 to Pna-1-1   | <i>β</i> -proteobacteria | Burkholderiales   | Comamonadaceae     | <i>Polaromonas naphthalenivorans</i> CJ2                                 |
| Psp-1-1 to Psp-1-1   | <i>β</i> -proteobacteria | Burkholderiales   | Comamonadaceae     | <i>Polaromonas</i> sp. JS666                                             |
| Rfe-1-1 to Rfe-1-1   | <i>β</i> -proteobacteria | Burkholderiales   | Comamonadaceae     | <i>Rhodoferax ferrireducens</i> T118                                     |
| Rge-1-1 to Rge-1-1   | <i>β</i> -proteobacteria | Burkholderiales   |                    | <i>Rubrivivax gelatinosus</i> PM1                                        |
| Tde-1-1 to Tde-1-1   | <i>β</i> -proteobacteria | Hydrogenophilales | Hydrogenophilaceae | <i>Thiobacillus denitrificans</i> ATCC 25259                             |
| Mfl-1-1 to Mfl-1-1   | <i>β</i> -proteobacteria | Methylophilales   | Methylophilaceae   | <i>Methylobacillus flagellatus</i> KT                                    |
| Cvi-1-1 to Cvi-1-1   | <i>β</i> -proteobacteria | Neisseriales      | Neisseriaceae      | <i>Chromobacterium violaceum</i> ATCC 12472                              |
| Neu-1-1 to Neu-1-1   | <i>β</i> -proteobacteria | Nitrosomonadales  | Nitrosomonadaceae  | <i>Nitrosomonas europaea</i> ATCC 19718                                  |
| Neu-2-1 to Neu-2-1   | <i>β</i> -proteobacteria | Nitrosomonadales  | Nitrosomonadaceae  | <i>Nitrosomonas eutropha</i> C71                                         |
| Nmu-1-1 to Nmu-1-1   | <i>β</i> -proteobacteria | Nitrosomonadales  | Nitrosomonadaceae  | <i>Nitrospira multififormis</i> ATCC 25196                               |
| Asp-2-1 to Asp-2-1   | <i>β</i> -proteobacteria | Rhodocyclales     | Rhodocyclaceae     | <i>Azoarcus</i> sp. EbN1                                                 |
| Dar-1-1 to Dar-1-1   | <i>β</i> -proteobacteria | Rhodocyclales     | Rhodocyclaceae     | <i>Dechloromonas aromatica</i> RCB                                       |

| abbrev  | RefSeq accession  |   | 5' at   | 3' at   | genes                                                                                                                                                |
|---------|-------------------|---|---------|---------|------------------------------------------------------------------------------------------------------------------------------------------------------|
| Bth-1-1 | NC_007651.1       | + | 3483591 | 3483692 | ← <a href="#">COG2863 (COG2863)</a> <a href="#">COG0218 (COG0218)</a> → RNA → <a href="#">ALAD (pfam00490)</a> →                                     |
| Bsp-1-1 | NC_007510.1       | - | 340248  | 340152  | ← <a href="#">COG4232 (COG4232)</a> <a href="#">DsbDgamma (cd02953)</a> →                                                                            |
| Bce-1-1 | NC_008060.1       | + | 3003024 | 3003120 | ← <a href="#">COG2863 (COG2863)</a> <a href="#">COG0218 (COG0218)</a> → RNA → <a href="#">ALAD (pfam00490)</a> → ← <a href="#">COG4232 (COG4232)</a> |
| Bce-2-1 | NZ_AAHL01000010.1 | + | 118443  | 118539  | ← <a href="#">COG2863 (COG2863)</a> <a href="#">COG0218 (COG0218)</a> → RNA → <a href="#">ALAD (pfam00490)</a> → ← <a href="#">COG4232 (COG4232)</a> |
| Bce-3-1 | NZ_AAKX01000036.1 | + | 46066   | 46162   | ← <a href="#">COG2863 (COG2863)</a> <a href="#">COG0218 (COG0218)</a> → RNA → <a href="#">ALAD (pfam00490)</a> → ← <a href="#">COG4232 (COG4232)</a> |
| Bam-1-1 | NZ_AAJL01000014.1 | - | 12222   | 12126   | ← <a href="#">COG2863 (COG2863)</a> <a href="#">COG0218 (COG0218)</a> → RNA → <a href="#">ALAD (pfam00490)</a> → ← <a href="#">COG4232 (COG4232)</a> |
| Bsp-1-2 | NC_007510.1       | - | 340248  | 340149  | ← <a href="#">COG2863 (COG2863)</a> <a href="#">COG0218 (COG0218)</a> → RNA → <a href="#">ALAD (pfam00490)</a> → ← <a href="#">COG4232 (COG4232)</a> |
| Bce-1-2 | NC_008060.1       | + | 3003024 | 3003123 | ← <a href="#">COG2863 (COG2863)</a> <a href="#">COG0218 (COG0218)</a> → RNA → <a href="#">ALAD (pfam00490)</a> → ← <a href="#">COG4232 (COG4232)</a> |
| Bce-2-2 | NZ_AAHL01000010.1 | + | 118443  | 118542  | ← <a href="#">COG2863 (COG2863)</a> <a href="#">COG0218 (COG0218)</a> → RNA → <a href="#">ALAD (pfam00490)</a> → ← <a href="#">COG4232 (COG4232)</a> |
| Bce-3-2 | NZ_AAKX01000036.1 | + | 46066   | 46165   | ← <a href="#">COG2863 (COG2863)</a> <a href="#">COG0218 (COG0218)</a> → RNA → <a href="#">ALAD (pfam00490)</a> → ← <a href="#">COG4232 (COG4232)</a> |
| Bdo-1-1 | NZ_AAKY01000127.1 | + | 3544    | 3640    | ← <a href="#">COG2863 (COG2863)</a> <a href="#">COG0218 (COG0218)</a> → RNA → <a href="#">ALAD (pfam00490)</a> → ← <a href="#">COG4232 (COG4232)</a> |
| Bma-4-1 | NC_006348.1       | + | 2711794 | 2711889 | ← <a href="#">COG2863 (COG2863)</a> <a href="#">COG0218 (COG0218)</a> → RNA → <a href="#">ALAD (pfam00490)</a> →                                     |
| Bma-1-1 | NZ_AAHM02000001.1 | - | 1978857 | 1978762 | ← <a href="#">COG4232 (COG4232)</a> <a href="#">DsbDgamma (cd02953)</a> →                                                                            |
|         |                   |   |         |         | ← <a href="#">COG2863 (COG2863)</a> <a href="#">COG0218 (COG0218)</a> → RNA → <a href="#">ALAD (pfam00490)</a> →                                     |
|         |                   |   |         |         | ← <a href="#">COG4232 (COG4232)</a> <a href="#">DsbDgamma (cd02953)</a> →                                                                            |

|          |                   |   |         |         |                                                                                                                           |
|----------|-------------------|---|---------|---------|---------------------------------------------------------------------------------------------------------------------------|
| Bma-2-1  | NZ_AAHN02000036.1 | + | 27668   | 27763   | ← COG2863 (COG2863) COG0218 (COG0218) → RNA → ALAD (pfam00490) →                                                          |
| Bma-6-1  | NZ_AAHO01000046.1 | + | 26960   | 27055   | ← COG4232 (COG4232) DsbDgamma (cd02953) → RNA → ALAD (pfam00490) →                                                        |
| Bma-8-1  | NZ_AAHP01000073.1 | - | 15701   | 15606   | ← COG2863 (COG2863) COG0218 (COG0218) → RNA → ALAD (pfam00490) →                                                          |
| Bma-9-1  | NZ_AAHQ02000001.1 | - | 46540   | 46445   | ← COG4232 (COG4232) DsbDgamma (cd02953) → RNA → ALAD (pfam00490) →                                                        |
| Bma-5-1  | NZ_AAIQ02000040.1 | + | 26976   | 27071   | ← COG2863 (COG2863) COG0218 (COG0218) → RNA → ALAD (pfam00490) →                                                          |
| Bma-7-1  | NZ_AAIR02000039.1 | + | 26973   | 27068   | ← COG4232 (COG4232) DsbDgamma (cd02953) → RNA → ALAD (pfam00490) →                                                        |
| Bma-3-1  | NZ_AANX02000049.1 | + | 28921   | 29016   | ← COG2863 (COG2863) COG0218 (COG0218) → RNA → ALAD (pfam00490) →                                                          |
| Bps-8-1  | NC_006350.1       | + | 3790869 | 3790964 | ← COG4232 (COG4232) DsbDgamma (cd02953) → RNA → ALAD (pfam00490) →                                                        |
| Bps-5-1  | NC_007434.1       | + | 4084282 | 4084377 | ← COG2863 (COG2863) COG0218 (COG0218) → RNA → ALAD (pfam00490) →                                                          |
| Bps-3-1  | NZ_AAHR02000026.1 | - | 18475   | 18380   | ← COG4232 (COG4232) DsbDgamma (cd02953) → RNA → ALAD (pfam00490) →                                                        |
| Bps-4-1  | NZ_AAHS02000015.1 | + | 115543  | 115638  | ← COG2863 (COG2863) COG0218 (COG0218) → RNA → ALAD (pfam00490) →                                                          |
| Bps-7-1  | NZ_AAHU01000011.1 | - | 18488   | 18393   | ← COG4232 (COG4232) DsbDgamma (cd02953) → RNA → ALAD (pfam00490) →                                                        |
| Bps-9-1  | NZ_AAHV02000014.1 | - | 18480   | 18385   | ← COG2863 (COG2863) COG0218 (COG0218) → RNA → ALAD (pfam00490) →                                                          |
| Bps-10-1 | NZ_AAHW02000029.1 | + | 80251   | 80346   | ← COG4232 (COG4232) DsbDgamma (cd02953) → RNA → ALAD (pfam00490) →                                                        |
| Bps-1-1  | NZ_AAMA01000030.1 | + | 59482   | 59577   | ← COG2863 (COG2863) COG0218 (COG0218) → RNA → ALAD (pfam00490) →                                                          |
| Bps-2-1  | NZ_AAMB01000047.1 | + | 35379   | 35474   | ← COG4232 (COG4232) DsbDgamma (cd02953) → RNA → ALAD (pfam00490) →                                                        |
| Bps-6-1  | NZ_AAMM02000024.1 | - | 16212   | 16117   | ← COG2863 (COG2863) COG0218 (COG0218) → RNA → ALAD (pfam00490) →                                                          |
| Bvi-1-1  | NZ_AAEH02000055.1 | - | 14114   | 14018   | ← COG4232 (COG4232) DsbDgamma (cd02953) → RNA → ALAD (pfam00490) → ← COG4232 (COG4232)                                    |
| Bxe-1-1  | NC_007951.1       | + | 4496259 | 4496363 | ← COG2863 (COG2863) COG0218 (COG0218) → RNA → ALAD (pfam00490) →                                                          |
| Psp-1-1  | NC_007948.1       | - | 269077  | 268981  | ← COG4232 (COG4232) DsbDgamma (cd02953) → VanZ like protein ← COG1981 (COG1981) RNA → ALAD (pfam00490) → CorA (COG0598) → |
| Rfe-1-1  | NC_007908.1       | + | 4244992 | 4245088 | ← VanZ like protein ← COG1981 (COG1981) RNA → ALAD (pfam00490) → CorA (COG0598) →                                         |
| Rso-2-1  | NZ_AAKL01000032.1 | - | 18786   | 18678   | ← COG2863 (COG2863) COG0218 (COG0218) → RNA → ALAD (pfam00490) → ← COG4232 (COG4232)                                      |
| Rso-1-1  | NC_003295.1       | + | 3222003 | 3222105 | ← COG2863 (COG2863) COG0218 (COG0218) → RNA → ALAD (pfam00490) → ← COG4232 (COG4232)                                      |
| Rme-1-1  | NC_007973.1       | + | 3561927 | 3562029 | ← COG2863 (COG2863) COG0218 (COG0218) → RNA → ALAD (pfam00490) → CorA (COG0598) →                                         |
| Reu-2-1  | NC_007347.1       | + | 3460223 | 3460323 | ← COG2863 (COG2863) COG0218 (COG0218) → RNA → ALAD (pfam00490) → CorA (COG0598) →                                         |
| Reu-1-1  | NC_008313.1       | + | 3733625 | 3733720 | ← COG2863 (COG2863) COG0218 (COG0218) → RNA → ALAD (pfam00490) → CorA (COG0598) →                                         |
| Mfl-1-1  | NC_007947.1       | - | 372278  | 372176  | ← Cpn10 (pfam00166) → GroEL (cd03344) → RNA → UvrD (COG0210) → ← hypo                                                     |
| Asp-2-1  | NC_006513.1       | - | 626325  | 626226  | ← COG2863 (COG2863) COG0218 (COG0218) → RNA → ALAD (pfam00490) → ← COG1011 (COG1011)                                      |
| Nmu-1-1  | NC_007614.1       | - | 2372743 | 2372646 | ← COG1521 (COG1521) → COG0218 (COG0218) → RNA → ALAD (pfam00490) → ← MrcA (COG5009)                                       |







## 2.7 anti-hemB

| abbrev. of hits    | taxonomy of species                                                                                                                        |
|--------------------|--------------------------------------------------------------------------------------------------------------------------------------------|
| Bam-1-1 to Bam-1-1 | $\beta$ -proteobacteria Burkholderiales Burkholderiaceae Burkholderia Burkholderia cepacia complex <i>Burkholderia ambifaria</i> AMMD      |
| Bce-1-1 to Bce-1-1 | $\beta$ -proteobacteria Burkholderiales Burkholderiaceae Burkholderia Burkholderia cepacia complex <i>Burkholderia cenocepacia</i> AU 1054 |
| Bce-2-1 to Bce-2-1 | $\beta$ -proteobacteria Burkholderiales Burkholderiaceae Burkholderia Burkholderia cepacia complex <i>Burkholderia cenocepacia</i> HI2424  |
| Bce-3-1 to Bce-3-1 | $\beta$ -proteobacteria Burkholderiales Burkholderiaceae Burkholderia Burkholderia cepacia complex <i>Burkholderia cenocepacia</i> PC184   |
| Bdo-1-1 to Bdo-1-1 | $\beta$ -proteobacteria Burkholderiales Burkholderiaceae Burkholderia Burkholderia cepacia complex <i>Burkholderia dolosa</i> AU0158       |
| Bsp-1-1 to Bsp-1-1 | $\beta$ -proteobacteria Burkholderiales Burkholderiaceae Burkholderia Burkholderia cepacia complex <i>Burkholderia</i> sp. 383             |
| Bvi-1-1 to Bvi-1-1 | $\beta$ -proteobacteria Burkholderiales Burkholderiaceae Burkholderia Burkholderia cepacia complex <i>Burkholderia vietnamiensis</i> G4    |
| Bma-1-1 to Bma-1-1 | $\beta$ -proteobacteria Burkholderiales Burkholderiaceae <i>Burkholderia mallei</i> 10229                                                  |
| Bma-2-1 to Bma-2-1 | $\beta$ -proteobacteria Burkholderiales Burkholderiaceae <i>Burkholderia mallei</i> 10399                                                  |
| Bma-3-1 to Bma-3-1 | $\beta$ -proteobacteria Burkholderiales Burkholderiaceae <i>Burkholderia mallei</i> 2002721280                                             |
| Bma-4-1 to Bma-4-1 | $\beta$ -proteobacteria Burkholderiales Burkholderiaceae <i>Burkholderia mallei</i> ATCC 23344                                             |
| Bma-5-1 to Bma-5-1 | $\beta$ -proteobacteria Burkholderiales Burkholderiaceae <i>Burkholderia mallei</i> FMH                                                    |
| Bma-6-1 to Bma-6-1 | $\beta$ -proteobacteria Burkholderiales Burkholderiaceae <i>Burkholderia mallei</i> GB8 horse 4                                            |
| Bma-7-1 to Bma-7-1 | $\beta$ -proteobacteria Burkholderiales Burkholderiaceae <i>Burkholderia mallei</i> JHU                                                    |
| Bma-8-1 to Bma-8-1 | $\beta$ -proteobacteria Burkholderiales Burkholderiaceae <i>Burkholderia mallei</i> NCTC 10247                                             |
| Bma-9-1 to Bma-9-1 | $\beta$ -proteobacteria Burkholderiales Burkholderiaceae <i>Burkholderia mallei</i> SAVP1                                                  |
| Bxe-1-1 to Bxe-1-1 | $\beta$ -proteobacteria Burkholderiales Burkholderiaceae <i>Burkholderia xenovorans</i> LB400                                              |
| Bth-1-1 to Bth-1-1 | $\beta$ -proteobacteria Burkholderiales Burkholderiaceae Burkholderia pseudomallei group <i>Burkholderia thailandensis</i> E264            |
| Reu-1-1 to Reu-1-1 | $\beta$ -proteobacteria Burkholderiales Burkholderiaceae Cupriavidus <i>Ralstonia eutropha</i> H16                                         |
| Reu-2-1 to Reu-2-1 | $\beta$ -proteobacteria Burkholderiales Burkholderiaceae Cupriavidus <i>Ralstonia eutropha</i> JMP134                                      |
| Rme-1-1 to Rme-1-1 | $\beta$ -proteobacteria Burkholderiales Burkholderiaceae Cupriavidus <i>Ralstonia metallidurans</i> CH34                                   |
| Rso-1-1 to Rso-1-1 | $\beta$ -proteobacteria Burkholderiales Burkholderiaceae <i>Ralstonia solanacearum</i> GMI1000                                             |
| Rso-2-1 to Rso-2-1 | $\beta$ -proteobacteria Burkholderiales Burkholderiaceae <i>Ralstonia solanacearum</i> UW551                                               |
| Asp-1-1 to Asp-1-1 | $\beta$ -proteobacteria Burkholderiales Comamonadaceae <i>Acidovorax</i> sp. JS42                                                          |
| Pna-1-1 to Pna-1-2 | $\beta$ -proteobacteria Burkholderiales Comamonadaceae <i>Polaromonas naphthalenivorans</i> CJ2                                            |
| Psp-1-1 to Psp-1-1 | $\beta$ -proteobacteria Burkholderiales Comamonadaceae <i>Polaromonas</i> sp. JS666                                                        |
| Rfe-1-1 to Rfe-1-1 | $\beta$ -proteobacteria Burkholderiales Comamonadaceae <i>Rhodoferax ferrireducens</i> T118                                                |
| Rge-1-1 to Rge-1-1 | $\beta$ -proteobacteria Burkholderiales <i>Rubrivivax gelatinosus</i> PM1                                                                  |
| Tde-1-1 to Tde-1-1 | $\beta$ -proteobacteria Hydrogenophilales Hydrogenophilaceae <i>Thiobacillus denitrificans</i> ATCC 25259                                  |
| Mfl-1-1 to Mfl-1-1 | $\beta$ -proteobacteria Methylophilales Methylophilaceae <i>Methylobacillus flagellatus</i> KT                                             |
| Cvi-1-1 to Cvi-1-1 | $\beta$ -proteobacteria Neisseriales Neisseriaceae <i>Chromobacterium violaceum</i> ATCC 12472                                             |
| Neu-1-1 to Neu-1-1 | $\beta$ -proteobacteria Nitrosomonadales Nitrosomonadaceae <i>Nitrosomonas europaea</i> ATCC 19718                                         |
| Neu-2-1 to Neu-2-1 | $\beta$ -proteobacteria Nitrosomonadales Nitrosomonadaceae <i>Nitrosomonas eutropha</i> C71                                                |
| Nmu-1-1 to Nmu-1-1 | $\beta$ -proteobacteria Nitrosomonadales Nitrosomonadaceae <i>Nitrospira multififormis</i> ATCC 25196                                      |
| Asp-2-1 to Asp-2-1 | $\beta$ -proteobacteria Rhodocyclales Rhodocyclaceae <i>Azoarcus</i> sp. EbN1                                                              |
| Dar-1-1 to Dar-1-1 | $\beta$ -proteobacteria Rhodocyclales Rhodocyclaceae <i>Dechloromonas aromatica</i> RCB                                                    |

| abbrev  | RefSeq accession  |   | 5' at   | 3' at   | genes                                                                                                   |
|---------|-------------------|---|---------|---------|---------------------------------------------------------------------------------------------------------|
| Rge-1-1 | NZ_AAEM01000003.1 | - | 152052  | 151950  | ←CorA (COG0598) ←ALAD (pfam00490) RNA→ COG1981 (COG1981)→ hypo→                                         |
| Bxe-1-1 | NC_007951.1       | - | 4496363 | 4496259 | COG4232 (COG4232) DsbDgamma (cd02953) → ←ALAD (pfam00490) RNA→ ←COG0218 (COG0218) →                     |
| Bsp-1-1 | NC_007510.1       | + | 340152  | 340248  | COG2863 (COG2863) → COG4232 (COG4232) → ←ALAD (pfam00490) RNA→ ←COG0218 (COG0218) COG2863 (COG2863) →   |
| Bce-1-1 | NC_008060.1       | - | 3003120 | 3003024 | COG4232 (COG4232) → ←ALAD (pfam00490) RNA→ ←COG0218 (COG0218) COG2863 (COG2863) →                       |
| Bce-2-1 | NZ_AAHL01000010.1 | - | 118539  | 118443  | COG4232 (COG4232) → ←ALAD (pfam00490) RNA→ ←COG0218 (COG0218) COG2863 (COG2863) →                       |
| Bce-3-1 | NZ_AAKX01000036.1 | - | 46162   | 46066   | COG4232 (COG4232) → ←ALAD (pfam00490) RNA→ ←COG0218 (COG0218) COG2863 (COG2863) →                       |
| Bam-1-1 | NZ_AAJL01000014.1 | + | 12126   | 12222   | COG4232 (COG4232) → ←ALAD (pfam00490) RNA→ ←COG0218 (COG0218) COG2863 (COG2863) →                       |
| Bdo-1-1 | NZ_AAKY01000127.1 | - | 3640    | 3544    | COG4232 (COG4232) → ←ALAD (pfam00490) RNA→ ←COG0218 (COG0218) COG2863 (COG2863) →                       |
| Bvi-1-1 | NZ_AAEH02000055.1 | + | 14018   | 14114   | COG4232 (COG4232) → ←ALAD (pfam00490) RNA→ ←COG0218 (COG0218) COG2863 (COG2863) →                       |
| Bma-4-1 | NC_006348.1       | - | 2711889 | 2711794 | COG4232 (COG4232) DsbDgamma (cd02953) → ←ALAD (pfam00490) RNA→ ←COG0218 (COG0218) →                     |
| Bma-1-1 | NZ_AAHM02000001.1 | + | 1978762 | 1978857 | COG2863 (COG2863) → COG4232 (COG4232) DsbDgamma (cd02953) → ←ALAD (pfam00490) RNA→ ←COG0218 (COG0218) → |
| Bma-2-1 | NZ_AAHN02000036.1 | - | 27763   | 27668   | COG2863 (COG2863) → COG4232 (COG4232) DsbDgamma (cd02953) → ←ALAD (pfam00490) RNA→ ←COG0218 (COG0218) → |
| Bma-6-1 | NZ_AAHO01000046.1 | - | 27055   | 26960   | COG2863 (COG2863) → COG4232 (COG4232) DsbDgamma (cd02953) → ←ALAD (pfam00490) RNA→ ←COG0218 (COG0218) → |
| Bma-8-1 | NZ_AAHP01000073.1 | + | 15606   | 15701   | COG2863 (COG2863) → COG4232 (COG4232) DsbDgamma (cd02953) → ←ALAD (pfam00490) RNA→ ←COG0218 (COG0218) → |
| Bma-9-1 | NZ_AAHQ02000001.1 | + | 46445   | 46540   | COG2863 (COG2863) → COG4232 (COG4232) DsbDgamma (cd02953) → ←ALAD (pfam00490) RNA→ ←COG0218 (COG0218) → |
| Bma-5-1 | NZ_AAIQ02000040.1 | - | 27071   | 26976   | COG2863 (COG2863) → COG4232 (COG4232) DsbDgamma (cd02953) → ←ALAD (pfam00490) RNA→ ←COG0218 (COG0218) → |
| Bma-7-1 | NZ_AAIR02000039.1 | - | 27068   | 26973   | COG2863 (COG2863) → COG4232 (COG4232) DsbDgamma (cd02953) → ←ALAD (pfam00490) RNA→ ←COG0218 (COG0218) → |
| Bma-3-1 | NZ_AANX02000049.1 | - | 29016   | 28921   | COG2863 (COG2863) → COG4232 (COG4232) DsbDgamma (cd02953) → ←ALAD (pfam00490) RNA→ ←COG0218 (COG0218) → |
| Bth-1-1 | NC_007651.1       | - | 3483692 | 3483591 | COG2863 (COG2863) → COG4232 (COG4232) DsbDgamma (cd02953) → ←ALAD (pfam00490) RNA→ ←COG0218 (COG0218) → |
| Rfe-1-1 | NC_007908.1       | - | 4245088 | 4244992 | ←CorA (COG0598) ←ALAD (pfam00490) RNA→ COG1981 (COG1981)→ VanZ like protein→                            |
| Pna-1-1 | NZ_AANM01000002.1 | - | 129218  | 129119  | ←CorA (COG0598) ←ALAD (pfam00490) RNA→ COG1981 (COG1981)→ putative membrane protein→                    |
| Cvi-1-1 | NC_005085.1       | - | 4728607 | 4728513 | ←COG2863 (COG2863) COG0218 (COG0218) → RNA→ ←RlpA (COG0797) ←CspR (COG0219) →                           |
| Tde-1-1 | NC_007404.1       | - | 201549  | 201454  | ←hypo ←ALAD (pfam00490) RNA→ ←COG0218 (COG0218) COG2863 (COG2863) →                                     |
| Asp-2-1 | NC_006513.1       | + | 626226  | 626325  | COG1011 (COG1011) → ←ALAD (pfam00490) RNA→ ←COG0218 (COG0218) COG2863 (COG2863) →                       |
| Nmu-1-1 | NC_007614.1       | + | 2372646 | 2372743 | MrcA (COG5009) → ←ALAD (pfam00490) RNA→ ←COG0218 (COG0218) ←COG1521 (COG1521) →                         |
| Mfl-1-1 | NC_007947.1       | + | 372176  | 372278  | hypo → ←UvrD (COG0210) RNA→ ←GroEL (cd03344) ←Cpn10 (pfam00166) →                                       |
| Dar-1-1 | NC_007298.1       | - | 691067  | 690971  | AcrR (COG1309) → ←ALAD (pfam00490) RNA→ ←COG0218 (COG0218) COG2863 (COG2863) →                          |
| Rme-1-1 | NC_007973.1       | - | 3562029 | 3561927 | ←CorA (COG0598) ←ALAD (pfam00490) RNA→ ←COG0218 (COG0218) COG2863 (COG2863) →                           |
| Reu-1-1 | NC_008313.1       | - | 3733720 | 3733625 | ←CorA (COG0598) ←ALAD (pfam00490) RNA→ ←COG0218 (COG0218) COG2863 (COG2863) →                           |
| Reu-2-1 | NC_007347.1       | - | 3460323 | 3460223 | ←CorA (COG0598) ←ALAD (pfam00490) RNA→ ←COG0218 (COG0218) COG2863 (COG2863) →                           |
| Rso-2-1 | NZ_AAKL01000032.1 | + | 18678   | 18786   | COG4232 (COG4232) → ←ALAD (pfam00490) RNA→ ←COG0218 (COG0218) COG2863 (COG2863) →                       |
| Rso-1-1 | NC_003295.1       | - | 3222105 | 3222003 | COG4232 (COG4232) → ←ALAD (pfam00490) RNA→ ←COG0218 (COG0218) COG2863 (COG2863) →                       |
| Psp-1-1 | NC_007948.1       | + | 268981  | 269077  | ←CorA (COG0598) ←ALAD (pfam00490) RNA→ COG1981 (COG1981)→ VanZ like protein→                            |
| Neu-1-1 | NC_004757.1       | + | 2684363 | 2684455 | GckA (COG2379) → ←ALAD (pfam00490) RNA→ ←COG0218 (COG0218) ←COG1521 (COG1521) →                         |
| Neu-2-1 | NZ_AAJE01000012.1 | - | 18888   | 18796   | PstB (COG1117) → ←ALAD (pfam00490) RNA→ ←COG0218 (COG0218) ←COG1521 (COG1521) →                         |
| Asp-1-1 | NZ_AASD01000001.1 | + | 356483  | 356570  | ←ALAD (pfam00490) LplA (COG0095) → RNA→ COG1981 (COG1981)→ VanZ like protein→                           |
| Pna-1-2 | NZ_AANM01000011.1 | + | 13971   | 14054   | ←hypo DUF932 (pfam06067) → RNA→ RadC (pfam04002) → ParB-like nuclease→                                  |

**cd02953** DsbD gamma family; DsbD gamma is the C-terminal periplasmic domain of the bacterial protein DsbD.  
**cd03344** GroEL-like type I chaperonin.  
**COG0095** Lipoate-protein ligase A [Coenzyme metabolism]  
**COG0210** Superfamily I DNA and RNA helicases [DNA replication, recombination, and repair]  
**COG0218** Predicted GTPase [General function prediction only]  
**COG0219** Predicted rRNA methylase (SpoU class) [Translation, ribosomal structure and biogenesis]  
**COG0598** Mg<sup>2+</sup> and Co<sup>2+</sup> transporters [Inorganic ion transport and metabolism]  
**COG0797** Lipoproteins [Cell envelope biogenesis, outer membrane]  
**COG1011** Predicted hydrolase (HAD superfamily) [General function prediction only]  
**COG1117** ABC-type phosphate transport system, ATPase component [Inorganic ion transport and metabolism]

**COG1309** Transcriptional regulator [Transcription]  
**COG1521** Putative transcriptional regulator, homolog of Bvg accessory factor [Transcription]  
**COG1981** Predicted membrane protein [Function unknown]  
**COG2379** Putative glycerate kinase [Carbohydrate transport and metabolism]  
**COG2863** Cytochrome c553 [Energy production and conversion]  
**COG4232** Thioldisulfide interchange protein [Posttranslational modification, protein turnover, chaperones / Energy production and conversion]  
**COG5009** Membrane carboxypeptidase/penicillin-binding protein [Cell envelope biogenesis, outer membrane]  
**pfam00166** Chaperonin 10 Kd subunit.  
**pfam00490** Delta-aminolevulinic acid dehydratase.  
**pfam04002** RadC, DNA repair protein.  
**pfam06067** Domain of unknown function (DUF932).

Duplicate sequences: the following putative homologs are not shown in the alignment because their sequences are identical to a homolog already shown: Bce-1-1, Bce-2-1, Bce-3-1, Bma-1-1, Bma-2-1, Bma-3-1, Bma-5-1, Bma-6-1, Bma-7-1, Bma-8-1, Bma-9-1



7. Tryptophan synthase alpha chain (COG0159)
  8. Acyl-CoA synthetase (AMP-forming)/AMP-acid ligases II (COG0318, COG0365)
  9. Citrate synthase (COG0372)
  10. gcvP, Glycine cleavage system protein P (COG0403)
  11. gcvT, Glycine cleavage system protein P (COG0404)
  12. uncharacterized NAD(FAD)-dependent dehydrogenases (COG0446)
  13. Biotin carboxyl carrier (COG0511)
  14. Predicted hydrolases or acetyltransferases (COG0596)
  15. Predicted dehydrogenases (COG0673)
  16. Acetyl-CoA carboxylase beta subunit (COG0777)
  17. Glycine cleavage system protein P, C-terminal domain (COG1003)
  18. NAD-dependent aldehyde dehydrogenase (COG1012)
  19. Enoyl-CoA hydratase/carnitine racemase (COG1024)
  20. Aconitase A (COG1048)
  21. Lactate (or related) dehydrogenase (COG1052)
  22. Dihydroneopterin aldolase (COG1539)
  23. Predicted acyl-CoA transferase/carnitine dehydratase (COG1804)
  24. Methylase involved in ubiquinone/menaquinone biosynthesis (COG2226)
  25. ABC-type sugar transporter (COG1129)
  26. Sugar phosphate permease (COG2271)
  27. Sugar (or other) transporter (pfam00083)
  28. ABC-type sugar transporter, periplasmic component (COG1879)
  29. Choline dehydrogenase (COG2303)
  30. Predicted carboxypeptidase (COG2866)
  31. Transcriptional activator of acetoin/glycerol metabolism (COG3284)
  32. Ketosteroid isomerase (COG4319)
  33. Sarcosine oxidase gamma subunit (COG4583)
  34. fer2 (cd00207). 2Fe-2S iron-sulfur cluster binding domain.
  35. alpha/beta hydrolase (COG4757)
  36. Acetyl/propionyl-CoA carboxylase, alpha subunit (COG4770)
  37. Short chain dehydrogenase (pfam00106)
  38. Aldehyde dehydrogenase (pfam00171)
  39. Quinolinate synthetase A (pfam02445)
  40. Allophanate hydrolase subunit 1 (pfam02682)
  41. ATP synthase, delta/epsilon chain (pfam02823)
  42. Sarcosine oxidase, delta subunit (pfam04267)
- Genes not necessarily involved in primary metabolism:
    1. Flagellar basal body rod protein (COG4786)
    2. Putative translation factor (COG0009)
    3. SUA5 domain (pfam03481)
    4. Biopolymer transport protein (COG0848)

## 2.8.2 Gene context and alignment

Notes:

- <sup>1</sup> Weak homology.
- <sup>2</sup> The loop sequence is highly unusual, but other features are conserved.
- <sup>3</sup> This homolog, which is in front of an unusual gene for this motif, has an atypical loop sequence, and may therefore be a false positive.
- <sup>4</sup> Weak homology on 5' end.
- <sup>5</sup> The downstream gene is on the opposite strand to this mini-glycine instance.
- <sup>6</sup> Overlaps Nonconserved
- <sup>7</sup> Overlaps 5'-end of hypothetical gene on opposite strand. The overlapping part of this gene does not appear to be conserved (according to BLAST).
- <sup>8</sup> This putative homolog lies in between annotated tRNAs and rRNAs. It has to be regarded suspiciously; unrelated RNAs are a common source of false positives because conserved stems are much more likely to (approximately) appear in them than random, non-RNA sequence.
- <sup>9</sup> Overlaps 5'-end of downstream gene; however, BLAST indicates that this part of the gene is not conserved.

#### abbrev. of hits

Bam-1-1 to Bam-1-15  
 Bce-1-1 to Bce-1-17  
 Bce-2-1 to Bce-2-17  
 Bce-3-1 to Bce-3-16  
 Bdo-1-1 to Bdo-1-22  
 Bsp-1-1 to Bsp-1-33  
 Bvi-1-1 to Bvi-1-4  
 Bma-1-1 to Bma-1-13  
 Bma-2-1 to Bma-2-13  
 Bma-3-1 to Bma-3-13  
 Bma-4-1 to Bma-4-13  
 Bma-5-1 to Bma-5-13  
 Bma-6-1 to Bma-6-13  
 Bma-7-1 to Bma-7-13  
 Bma-8-1 to Bma-8-16  
 Bma-9-1 to Bma-9-13  
 Bxe-1-1 to Bxe-1-36  
 Bps-1-1 to Bps-1-35  
 Bps-2-1 to Bps-2-31  
 Bps-3-1 to Bps-3-26  
 Bps-4-1 to Bps-4-23  
 Bps-5-1 to Bps-5-23  
 Bps-6-1 to Bps-6-32  
 Bps-7-1 to Bps-7-30  
 Bps-8-1 to Bps-8-25  
 Bps-9-1 to Bps-9-32  
 Bps-10-1 to Bps-10-29  
 Bth-1-1 to Bth-1-21  
 env-1 to env-75

#### taxonomy of species

$\beta$ -proteobacteria Burkholderiales Burkholderiaceae Burkholderia Burkholderia cepacia complex *Burkholderia ambifaria* AMMD  
 $\beta$ -proteobacteria Burkholderiales Burkholderiaceae Burkholderia Burkholderia cepacia complex *Burkholderia cenocepacia* AU 1054  
 $\beta$ -proteobacteria Burkholderiales Burkholderiaceae Burkholderia Burkholderia cepacia complex *Burkholderia cenocepacia* HI2424  
 $\beta$ -proteobacteria Burkholderiales Burkholderiaceae Burkholderia Burkholderia cepacia complex *Burkholderia cenocepacia* PC184  
 $\beta$ -proteobacteria Burkholderiales Burkholderiaceae Burkholderia Burkholderia cepacia complex *Burkholderia dolosa* AUO158  
 $\beta$ -proteobacteria Burkholderiales Burkholderiaceae Burkholderia Burkholderia cepacia complex *Burkholderia sp.* 383  
 $\beta$ -proteobacteria Burkholderiales Burkholderiaceae Burkholderia Burkholderia cepacia complex *Burkholderia vietnamiensis* G4  
 $\beta$ -proteobacteria Burkholderiales Burkholderiaceae *Burkholderia mallei* 10229  
 $\beta$ -proteobacteria Burkholderiales Burkholderiaceae *Burkholderia mallei* 10399  
 $\beta$ -proteobacteria Burkholderiales Burkholderiaceae *Burkholderia mallei* 2002721280  
 $\beta$ -proteobacteria Burkholderiales Burkholderiaceae *Burkholderia mallei* ATCC 23344  
 $\beta$ -proteobacteria Burkholderiales Burkholderiaceae *Burkholderia mallei* FMH  
 $\beta$ -proteobacteria Burkholderiales Burkholderiaceae *Burkholderia mallei* GB8 horse 4  
 $\beta$ -proteobacteria Burkholderiales Burkholderiaceae *Burkholderia mallei* JHU  
 $\beta$ -proteobacteria Burkholderiales Burkholderiaceae *Burkholderia mallei* NCTC 10247  
 $\beta$ -proteobacteria Burkholderiales Burkholderiaceae *Burkholderia mallei* SAVP1  
 $\beta$ -proteobacteria Burkholderiales Burkholderiaceae *Burkholderia xenovorans* LB400  
 $\beta$ -proteobacteria Burkholderiales Burkholderiaceae Burkholderia pseudomallei group *Burkholderia pseudomallei* 1106a  
 $\beta$ -proteobacteria Burkholderiales Burkholderiaceae Burkholderia pseudomallei group *Burkholderia pseudomallei* 1106b  
 $\beta$ -proteobacteria Burkholderiales Burkholderiaceae Burkholderia pseudomallei group *Burkholderia pseudomallei* 1655  
 $\beta$ -proteobacteria Burkholderiales Burkholderiaceae Burkholderia pseudomallei group *Burkholderia pseudomallei* 1710a  
 $\beta$ -proteobacteria Burkholderiales Burkholderiaceae Burkholderia pseudomallei group *Burkholderia pseudomallei* 1710b  
 $\beta$ -proteobacteria Burkholderiales Burkholderiaceae Burkholderia pseudomallei group *Burkholderia pseudomallei* 406e  
 $\beta$ -proteobacteria Burkholderiales Burkholderiaceae Burkholderia pseudomallei group *Burkholderia pseudomallei* 668  
 $\beta$ -proteobacteria Burkholderiales Burkholderiaceae Burkholderia pseudomallei group *Burkholderia pseudomallei* K96243  
 $\beta$ -proteobacteria Burkholderiales Burkholderiaceae Burkholderia pseudomallei group *Burkholderia pseudomallei* Pasteur  
 $\beta$ -proteobacteria Burkholderiales Burkholderiaceae Burkholderia pseudomallei group *Burkholderia pseudomallei* S13  
 $\beta$ -proteobacteria Burkholderiales Burkholderiaceae Burkholderia pseudomallei group *Burkholderia thailandensis* E264  
 environmental samples

abbrev      RefSeq accession      5' at      3' at      genes



|                       |                   |   |         |         |                                                                                             |
|-----------------------|-------------------|---|---------|---------|---------------------------------------------------------------------------------------------|
| Bam-1-1               | NZ_AAJL01000001.1 | + | 272992  | 273034  | RNA → RNA → DUF485 (pfam04341) → DhIC (COG4147) →                                           |
| Bam-1-3               | NZ_AAJL01000001.1 | + | 273041  | 273083  | (shown above)                                                                               |
| Bsp-1-1               | NC_007510.1       | - | 3085270 | 3085228 | RNA → PurE (COG0041) → PurK (COG0026) → SUA5 (COG0009)SUA5 (pfam03481) →                    |
| Bdo-1-1               | NZ_AAKY01000041.1 | + | 58852   | 58894   | RNA → RNA → AdhC (COG1062) → COG0627 (COG0627) →                                            |
| Bdo-1-12              | NZ_AAKY01000041.1 | + | 58901   | 58943   | (shown above)                                                                               |
| env-1                 | AACY01085258.1    | - | 855     | 813     | RNA → unknown →                                                                             |
| Bxe-1-4               | NC_007953.1       | + | 35411   | 35453   | RNA → XdhA (COG4630) → CoxS (COG2080) → Ald_Xan_dh_C (pfam01315)Ald_Xan_dh_C2 (pfam02738) → |
| Bxe-1-5               | NC_007951.1       | - | 3372361 | 3372319 | RNA → RNA → BetA (COG2303) →                                                                |
| Bxe-1-1               | NC_007951.1       | - | 3372312 | 3372270 | (shown above)                                                                               |
| env-2                 | AACY01029310.1    | - | 7922    | 7880    | RNA → RNA → unknown →                                                                       |
| env-3                 | AACY01029310.1    | - | 7872    | 7830    | (shown above)                                                                               |
| Bxe-1-6               | NC_007952.1       | - | 232814  | 232772  | RNA → RNA → RNA → SseA (COG2897) →                                                          |
| Bxe-1-7               | NC_007952.1       | - | 232765  | 232723  | (shown above)                                                                               |
| Bxe-1-8               | NC_007952.1       | - | 232716  | 232674  | (shown above)                                                                               |
| Bps-7-8               | NZ_AAHU01000005.1 | + | 92300   | 92342   | RNA → thiolase (cd00751) → CaiD (COG1024) →                                                 |
| Bxe-1-9               | NC_007951.1       | + | 1603440 | 1603482 | RNA → RNA → ExbD (COG0848) → hypo →                                                         |
| Bxe-1-10              | NC_007951.1       | + | 1603538 | 1603580 | (shown above)                                                                               |
| Bps-10-4              | NZ_AAHW02000016.1 | + | 20819   | 20862   | RNA → COG4319 (COG4319) →                                                                   |
| Bps-3-7               | NZ_AAHR02000001.1 | + | 42585   | 42628   | RNA → COG4319 (COG4319) →                                                                   |
| Bsp-1-3               | NC_007511.1       | - | 2435547 | 2435505 | RNA → TrpA (COG0159) → AccD (COG0777) →                                                     |
| Bce-1-2               | NC_008060.1       | - | 1793534 | 1793492 | RNA → COG2866 (COG2866) →                                                                   |
| Bce-1-3               | NC_008061.1       | - | 1639854 | 1639812 | RNA → TrpA (COG0159) → AccD (COG0777) →                                                     |
| Bce-2-2               | NZ_AAHL01000002.1 | + | 273545  | 273587  | RNA → COG2866 (COG2866) →                                                                   |
| Bce-2-3               | NZ_AAHL01000060.1 | + | 5914    | 5956    | RNA → TrpA (COG0159) → AccD (COG0777) →                                                     |
| env-6                 | AACY01074305.1    | - | 3485    | 3443    | RNA → RNA → unknown → unknown → unknown →                                                   |
| env-7                 | AACY01074305.1    | - | 3431    | 3389    | (shown above)                                                                               |
| Bps-5-5               | NC_007434.1       | - | 182681  | 182639  | RNA → RNA → RNA → RNA → ←hypo                                                               |
| Bps-5-6               | NC_007434.1       | - | 182588  | 182546  | (shown above)                                                                               |
| <sup>7</sup> Bps-5-20 | NC_007434.1       | - | 182773  | 182731  | (shown above)                                                                               |
| Bps-5-22              | NC_007434.1       | - | 182633  | 182593  | (shown above)                                                                               |
| Bth-1-5               | NC_007651.1       | - | 3769469 | 3769427 | RNA → RNA → RNA → ATP-synt.DE.N (pfam02823) →                                               |
| Bth-1-4               | NC_007651.1       | - | 3769285 | 3769243 | (shown above)                                                                               |
| Bth-1-6               | NC_007651.1       | - | 3769377 | 3769335 | (shown above)                                                                               |
| Bth-1-7               | NC_007651.1       | + | 1478855 | 1478897 | RNA → COG4319 (COG4319) →                                                                   |
| Bdo-1-2               | NZ_AAKY01000115.1 | + | 22806   | 22848   | RNA → GlcD (COG0277) → FAD_binding_4 (pfam01565) → FAD-oxidase_C (pfam02913) →              |
| env-8                 | AACY01054057.1    | + | 1681    | 1723    | RNA →                                                                                       |
| env-10                | AACY01078788.1    | - | 10646   | 10604   | RNA → RNA → RNA → unknown → unknown → unknown → unknown → unknown →                         |
| env-9                 | AACY01078788.1    | - | 10597   | 10555   | (shown above)                                                                               |
| env-11                | AACY01078788.1    | - | 10548   | 10506   | (shown above)                                                                               |
| Bdo-1-5               | NZ_AAKY01000054.1 | + | 26086   | 26128   | RNA → RNA → RNA → RNA → RNA → RNA → COG2866 (COG2866) →                                     |
| Bdo-1-3               | NZ_AAKY01000054.1 | + | 26282   | 26324   | (shown above)                                                                               |
| Bdo-1-4               | NZ_AAKY01000054.1 | + | 26331   | 26373   | (shown above)                                                                               |
| Bdo-1-7               | NZ_AAKY01000054.1 | + | 26135   | 26177   | (shown above)                                                                               |

|                     |                   |   |         |         |                                                                          |
|---------------------|-------------------|---|---------|---------|--------------------------------------------------------------------------|
| Bdo-1-8             | NZ_AAKY01000054.1 | + | 26184   | 26226   | (shown above)                                                            |
| Bdo-1-9             | NZ_AAKY01000054.1 | + | 26233   | 26275   | (shown above)                                                            |
| Bam-1-4             | NZ_AAJL01000013.1 | - | 101919  | 101877  | RNA → PurE (COG0041) → PurK (COG0026) → SUA5 (COG0009)SUA5 (pfam03481) → |
| env-14              | AACY01174822.1    | + | 483     | 525     | RNA →                                                                    |
| env-15              | AACY01198017.1    | - | 138     | 96      | RNA →                                                                    |
| Bdo-1-6             | NZ_AAKY01000044.1 | + | 16111   | 16153   | RNA → NadA (pfam02445) → QPRTase (cd01572) →                             |
| env-17              | AACY01120349.1    | + | 192319  | 192361  | RNA → unknown → unknown →                                                |
| env-18              | AACY01174822.1    | + | 532     | 574     | RNA →                                                                    |
| env-19              | AACY01198017.1    | - | 89      | 47      | RNA →                                                                    |
| Bce-1-6             | NC_008060.1       | - | 2091481 | 2091439 | RNA → RNA → NadA (pfam02445) → QPRTase (cd01572) →                       |
| Bce-1-8             | NC_008060.1       | - | 2091383 | 2091341 | (shown above)                                                            |
| Bce-2-6             | NZ_AAHL01000062.1 | + | 16826   | 16868   | RNA → RNA → NadA (pfam02445) → QPRTase (cd01572) →                       |
| Bce-2-8             | NZ_AAHL01000062.1 | + | 16924   | 16966   | (shown above)                                                            |
| Bce-3-6             | NZ_AAKX01000076.1 | + | 33252   | 33294   | RNA → NadA (pfam02445) → QPRTase (cd01572) →                             |
| Bce-1-7             | NC_008060.1       | + | 1995774 | 1995816 | RNA → RNA → PutA (COG1012) → adh_short (pfam00106) →                     |
| Bce-1-5             | NC_008060.1       | + | 1995873 | 1995915 | (shown above)                                                            |
| Bce-2-7             | NZ_AAHL01000002.1 | - | 71292   | 71250   | RNA → RNA → PutA (COG1012) → adh_short (pfam00106) →                     |
| Bce-2-5             | NZ_AAHL01000002.1 | - | 71193   | 71151   | (shown above)                                                            |
| <sup>6</sup> env-20 | AACY01057792.1    | - | 32713   | 32671   | RNA → RNA → ← unknown                                                    |
| env-21              | AACY01057792.1    | - | 32664   | 32622   | (shown above)                                                            |
| env-22              | AACY01057792.1    | - | 32615   | 32573   | RNA → unknown →                                                          |
| Bam-1-5             | NZ_AAJL01000003.1 | - | 664343  | 664301  | RNA → RNA → ACAD_fadE5 (cd01153) →                                       |
| Bam-1-2             | NZ_AAJL01000003.1 | - | 664294  | 664252  | (shown above)                                                            |
| Bth-1-8             | NC_007651.1       | + | 646278  | 646320  | RNA → thiolase (cd00751) → CaiD (COG1024) → hypo →                       |
| Bxe-1-12            | NC_007953.1       | - | 228490  | 228448  | RNA → Sugar_tr (pfam00083) → CaiB (COG1804) → IclR (COG1414) → hypo →    |
| Bps-8-13            | NC_006350.1       | - | 3368494 | 3368451 | RNA → RNA → COG4319 (COG4319) →                                          |
| Bps-8-2             | NC_006350.1       | - | 3368395 | 3368353 | (shown above)                                                            |
| Bps-5-9             | NC_007434.1       | - | 3627099 | 3627056 | RNA → RNA → COG4319 (COG4319) →                                          |
| Bps-5-2             | NC_007434.1       | - | 3627000 | 3626958 | (shown above)                                                            |
| Bma-4-6             | NC_006348.1       | - | 2411961 | 2411918 | RNA → RNA → RNA → COG4319 (COG4319) →                                    |
| Bma-4-1             | NC_006348.1       | - | 2411911 | 2411869 | (shown above)                                                            |
| Bma-4-2             | NC_006348.1       | - | 2411862 | 2411820 | (shown above)                                                            |
| Bma-1-6             | NZ_AAHM02000001.1 | - | 1111737 | 1111694 | RNA → RNA → RNA → COG4319 (COG4319) →                                    |
| Bma-1-1             | NZ_AAHM02000001.1 | - | 1111687 | 1111645 | (shown above)                                                            |
| Bma-1-2             | NZ_AAHM02000001.1 | - | 1111638 | 1111596 | (shown above)                                                            |
| Bma-2-6             | NZ_AAHN02000004.1 | + | 265112  | 265155  | RNA → RNA → RNA → COG4319 (COG4319) →                                    |
| Bma-2-1             | NZ_AAHN02000004.1 | + | 265162  | 265204  | (shown above)                                                            |
| Bma-2-2             | NZ_AAHN02000004.1 | + | 265211  | 265253  | (shown above)                                                            |
| Bma-6-6             | NZ_AAHO01000019.1 | - | 53214   | 53171   | RNA → RNA → RNA → COG4319 (COG4319) →                                    |
| Bma-6-1             | NZ_AAHO01000019.1 | - | 53164   | 53122   | (shown above)                                                            |
| Bma-6-2             | NZ_AAHO01000019.1 | - | 53115   | 53073   | (shown above)                                                            |
| Bma-8-8             | NZ_AAHP01000011.1 | + | 55145   | 55188   | RNA → RNA → RNA → COG4319 (COG4319) →                                    |
| Bma-8-1             | NZ_AAHP01000011.1 | + | 55195   | 55237   | (shown above)                                                            |

|          |                   |   |         |         |                                                                    |
|----------|-------------------|---|---------|---------|--------------------------------------------------------------------|
| Bma-8-3  | NZ_AAHP01000011.1 | + | 55244   | 55286   | (shown above)                                                      |
| Bma-8-9  | NZ_AAHP01000378.1 | - | 452     | 409     | RNA → RNA → RNA → COG4319: Ketosteroid isomerase homolog →         |
| Bma-8-2  | NZ_AAHP01000378.1 | - | 402     | 360     | (shown above)                                                      |
| Bma-8-4  | NZ_AAHP01000378.1 | - | 353     | 311     | (shown above)                                                      |
| Bma-9-6  | NZ_AAHQ02000001.1 | - | 2650854 | 2650811 | RNA → RNA → RNA → COG4319 (COG4319) →                              |
| Bma-9-1  | NZ_AAHQ02000001.1 | - | 2650804 | 2650762 | (shown above)                                                      |
| Bma-9-2  | NZ_AAHQ02000001.1 | - | 2650755 | 2650713 | (shown above)                                                      |
| Bps-4-9  | NZ_AAHS02000002.1 | - | 272033  | 271990  | RNA → RNA → COG4319 (COG4319) →                                    |
| Bps-4-1  | NZ_AAHS02000002.1 | - | 271934  | 271892  | (shown above)                                                      |
| Bps-9-16 | NZ_AAHV02000001.1 | + | 19484   | 19527   | RNA → RNA → COG4319 (COG4319) →                                    |
| Bps-9-1  | NZ_AAHV02000001.1 | + | 19583   | 19625   | (shown above)                                                      |
| Bma-5-6  | NZ_AAIQ02000002.1 | - | 71804   | 71761   | RNA → RNA → RNA → COG4319 (COG4319) →                              |
| Bma-5-1  | NZ_AAIQ02000002.1 | - | 71754   | 71712   | (shown above)                                                      |
| Bma-5-2  | NZ_AAIQ02000002.1 | - | 71705   | 71663   | (shown above)                                                      |
| Bma-7-6  | NZ_AAIR02000001.1 | - | 394278  | 394235  | RNA → RNA → RNA → COG4319 (COG4319) →                              |
| Bma-7-1  | NZ_AAIR02000001.1 | - | 394228  | 394186  | (shown above)                                                      |
| Bma-7-2  | NZ_AAIR02000001.1 | - | 394179  | 394137  | (shown above)                                                      |
| Bps-1-16 | NZ_AAMA01000011.1 | + | 19427   | 19470   | RNA → RNA → COG4319 (COG4319) →                                    |
| Bps-1-4  | NZ_AAMA01000011.1 | + | 19526   | 19568   | (shown above)                                                      |
| Bps-2-13 | NZ_AAMB01000001.1 | - | 373671  | 373628  | RNA → RNA → COG4319 (COG4319) →                                    |
| Bps-2-1  | NZ_AAMB01000001.1 | - | 373572  | 373530  | (shown above)                                                      |
| Bps-6-15 | NZ_AAMM02000001.1 | - | 267283  | 267240  | RNA → RNA → RNA → COG4319 (COG4319) →                              |
| Bps-6-8  | NZ_AAMM02000001.1 | - | 267233  | 267191  | (shown above)                                                      |
| Bps-6-7  | NZ_AAMM02000001.1 | - | 267135  | 267093  | (shown above)                                                      |
| Bma-3-6  | NZ_AANX02000012.1 | + | 80591   | 80634   | RNA → RNA → RNA → COG4319 (COG4319) →                              |
| Bma-3-1  | NZ_AANX02000012.1 | + | 80641   | 80683   | (shown above)                                                      |
| Bma-3-2  | NZ_AANX02000012.1 | + | 80690   | 80732   | (shown above)                                                      |
| Bsp-1-8  | NC_007510.1       | + | 2852721 | 2852763 | RNA → RNA → RNA → UhpC (COG2271) →                                 |
| Bsp-1-9  | NC_007510.1       | + | 2852770 | 2852812 | (shown above)                                                      |
| Bsp-1-10 | NC_007510.1       | + | 2852819 | 2852861 | (shown above)                                                      |
| Bdo-1-10 | NZ_AAKY01000054.1 | + | 18382   | 18424   | RNA → RNA → ACAD (cd00567) → YdeM (cd03454) → NodN (cd03450) →     |
| Bdo-1-11 | NZ_AAKY01000054.1 | + | 18431   | 18473   | (shown above)                                                      |
| Bxe-1-13 | NC_007951.1       | + | 2361599 | 2361641 | RNA → ← OmpR (COG0745)                                             |
| env-28   | AACY01077632.1    | + | 2716    | 2758    | RNA → unknown →                                                    |
| Bps-8-14 | NC_006351.1       | + | 842808  | 842850  | RNA → RNA → RNA → RNA → RNA → Acs (COG0365) → Aldedh (pfam00171) → |
| Bps-8-9  | NC_006351.1       | + | 842955  | 842997  | (shown above)                                                      |
| Bps-8-10 | NC_006351.1       | + | 843004  | 843046  | (shown above)                                                      |
| Bps-8-11 | NC_006351.1       | + | 843053  | 843095  | (shown above)                                                      |
| Bps-8-16 | NC_006351.1       | + | 842857  | 842899  | (shown above)                                                      |
| env-29   | AACY01119105.1    | + | 1026    | 1068    | RNA →                                                              |
| Bxe-1-16 | NC_007951.1       | - | 4652583 | 4652541 | RNA → RNA → RNA → SBP_bac.5 (pfam00496) →                          |
| Bxe-1-14 | NC_007951.1       | - | 4652485 | 4652443 | (shown above)                                                      |
| Bxe-1-15 | NC_007951.1       | - | 4652387 | 4652345 | (shown above)                                                      |

|          |                   |   |         |         |                                                                                                                            |
|----------|-------------------|---|---------|---------|----------------------------------------------------------------------------------------------------------------------------|
| env-31   | AACY01170267.1    | - | 53      | 11      | RNA→ RNA→ RNA→ RNA→ ←unknown                                                                                               |
| env-61   | AACY01170267.1    | - | 151     | 109     | (shown above)                                                                                                              |
| env-65   | AACY01170267.1    | - | 102     | 60      | (shown above)                                                                                                              |
| env-70   | AACY01170267.1    | - | 200     | 158     | (shown above)                                                                                                              |
| env-32   | AACY01174822.1    | + | 434     | 476     | RNA→                                                                                                                       |
| env-33   | AACY01198017.1    | - | 187     | 145     | RNA→                                                                                                                       |
| env-34   | AACY01074308.1    | + | 922     | 964     | RNA→                                                                                                                       |
| Bth-1-9  | NC_007650.1       | + | 1183543 | 1183585 | RNA→ SoxD (pfam04267)→ GcvT (COG0404)HcaD (COG0446)→ COG4583 (COG4583)→ FolB (COG1539)→                                    |
| Bdo-1-13 | NZ_AAKY01000086.1 | + | 72      | 114     | RNA→ CaiC (COG0318)→ hypo→                                                                                                 |
| env-36   | AACY01012789.1    | + | 514     | 556     | RNA→ unknown→                                                                                                              |
| env-37   | AACY01202489.1    | - | 162     | 120     | RNA→ unknown→                                                                                                              |
| env-38   | AACY01227980.1    | + | 534     | 576     | RNA→ unknown→                                                                                                              |
| env-39   | AACY01005766.1    | + | 98374   | 98416   | RNA→ RNA→ unknown→ unknown→                                                                                                |
| env-40   | AACY01005766.1    | + | 98423   | 98465   | (shown above)                                                                                                              |
| Bsp-1-11 | NC_007511.1       | - | 2023351 | 2023309 | RNA→ COG3384 (COG3384)→ HpaF (COG3232)→ COG3971 (COG3971)→ HpcH (COG3836)→                                                 |
| env-41   | AACY01120341.1    | - | 30946   | 30904   | RNA→ RNA→ unknown→ unknown→ unknown→ unknown→                                                                              |
| env-42   | AACY01120341.1    | - | 30897   | 30855   | (shown above)                                                                                                              |
| Bps-8-15 | NC_006351.1       | - | 1873032 | 1872990 | RNA→ RNA→ RNA→ RNA→ SoxD (pfam04267)→ GcvT (COG0404)HcaD (COG0446)→ COG4583 (COG4583)→ FolB (COG1539)→                     |
| Bps-8-12 | NC_006351.1       | - | 1872934 | 1872892 | (shown above)                                                                                                              |
| Bps-8-3  | NC_006351.1       | - | 1872885 | 1872843 | (shown above)                                                                                                              |
| Bps-8-4  | NC_006351.1       | - | 1872836 | 1872794 | (shown above)                                                                                                              |
| Bps-5-11 | NC_007435.1       | - | 553692  | 553650  | RNA→ RNA→ RNA→ RNA→ SoxD (pfam04267)→ GcvT (COG0404)HcaD (COG0446)→ COG4583 (COG4583)→ FolB (COG1539)→                     |
| Bps-5-8  | NC_007435.1       | - | 553594  | 553552  | (shown above)                                                                                                              |
| Bps-5-3  | NC_007435.1       | - | 553545  | 553503  | (shown above)                                                                                                              |
| Bps-5-12 | NC_007435.1       | - | 553643  | 553601  | (shown above)                                                                                                              |
| Bps-4-11 | NZ_AAHS02000004.1 | - | 27737   | 27695   | RNA→ RNA→ RNA→ RNA→ SoxD (pfam04267)→ GcvT (COG0404)HcaD (COG0446)→ COG4583 (COG4583)→ FolB (COG1539)→                     |
| Bps-4-8  | NZ_AAHS02000004.1 | - | 27639   | 27597   | (shown above)                                                                                                              |
| Bps-4-2  | NZ_AAHS02000004.1 | - | 27590   | 27548   | (shown above)                                                                                                              |
| Bps-4-12 | NZ_AAHS02000004.1 | - | 27688   | 27646   | (shown above)                                                                                                              |
| Bps-3-14 | NZ_AAHR02000020.1 | - | 34017   | 33975   | RNA→ RNA→ RNA→ RNA→ RNA→ SoxD (pfam04267)→ GcvT (COG0404)HcaD (COG0446)→ COG4583 (COG4583)→ FolB (COG1539)→                |
| Bps-3-13 | NZ_AAHR02000020.1 | - | 33968   | 33926   | (shown above)                                                                                                              |
| Bps-3-4  | NZ_AAHR02000020.1 | - | 33870   | 33828   | (shown above)                                                                                                              |
| Bps-3-5  | NZ_AAHR02000020.1 | - | 33821   | 33779   | (shown above)                                                                                                              |
| Bps-3-22 | NZ_AAHR02000020.1 | - | 33919   | 33877   | (shown above)                                                                                                              |
| Bps-9-19 | NZ_AAHV02000010.1 | - | 29789   | 29747   | RNA→ RNA→ RNA→ RNA→ RNA→ RNA→ RNA→ RNA→ SoxD (pfam04267)→ HcaD (COG0446)GcvT (COG0404)→ COG4583 (COG4583)→ FolB (COG1539)→ |
| Bps-9-18 | NZ_AAHV02000010.1 | - | 29740   | 29698   | (shown above)                                                                                                              |
| Bps-9-15 | NZ_AAHV02000010.1 | - | 29691   | 29649   | (shown above)                                                                                                              |
| Bps-9-3  | NZ_AAHV02000010.1 | - | 29642   | 29600   | (shown above)                                                                                                              |
| Bps-9-4  | NZ_AAHV02000010.1 | - | 29593   | 29551   | (shown above)                                                                                                              |
| Bps-9-5  | NZ_AAHV02000010.1 | - | 29544   | 29502   | (shown above)                                                                                                              |

|           |                   |   |        |        |                                                                                                                                |
|-----------|-------------------|---|--------|--------|--------------------------------------------------------------------------------------------------------------------------------|
| Bps-9-6   | NZ_AAHV02000010.1 | - | 29495  | 29453  | (shown above)                                                                                                                  |
| Bps-9-7   | NZ_AAHV02000010.1 | - | 29446  | 29404  | (shown above)                                                                                                                  |
| Bps-10-14 | NZ_AAHW02000007.1 | - | 29495  | 29453  | RNA → RNA → RNA → RNA → SoxD (pfam04267) → HcaD (COG0446) GcvT (COG0404) →<br>COG4583 (COG4583) → FolB (COG1539) →             |
| Bps-10-13 | NZ_AAHW02000007.1 | - | 29446  | 29404  | (shown above)                                                                                                                  |
| Bps-10-10 | NZ_AAHW02000007.1 | - | 29397  | 29355  | (shown above)                                                                                                                  |
| Bps-10-1  | NZ_AAHW02000007.1 | - | 29348  | 29306  | (shown above)                                                                                                                  |
| Bps-1-19  | NZ_AAMA01000007.1 | + | 147899 | 147941 | RNA → RNA → RNA → RNA → SoxD (pfam04267) → GcvT (COG0404) HcaD (COG0446) →<br>COG4583 (COG4583) → FolB (COG1539) →             |
| Bps-1-15  | NZ_AAMA01000007.1 | + | 147997 | 148039 | (shown above)                                                                                                                  |
| Bps-1-2   | NZ_AAMA01000007.1 | + | 148046 | 148088 | (shown above)                                                                                                                  |
| Bps-1-3   | NZ_AAMA01000007.1 | + | 148095 | 148137 | (shown above)                                                                                                                  |
| Bps-1-20  | NZ_AAMA01000203.1 | - | 609    | 567    | RNA → RNA → RNA → RNA → RNA → RNA → SoxD (pfam04267) →                                                                         |
| Bps-1-18  | NZ_AAMA01000203.1 | - | 560    | 518    | (shown above)                                                                                                                  |
| Bps-1-14  | NZ_AAMA01000203.1 | - | 511    | 469    | (shown above)                                                                                                                  |
| Bps-1-7   | NZ_AAMA01000203.1 | - | 462    | 420    | (shown above)                                                                                                                  |
| Bps-1-5   | NZ_AAMA01000203.1 | - | 413    | 371    | (shown above)                                                                                                                  |
| Bps-1-6   | NZ_AAMA01000203.1 | - | 364    | 322    | (shown above)                                                                                                                  |
| Bps-2-16  | NZ_AAMB01000012.1 | - | 34808  | 34766  | RNA → RNA → RNA → RNA → RNA → RNA → SoxD (pfam04267) → GcvT (COG0404) HcaD (COG0446) →<br>COG4583 (COG4583) → FolB (COG1539) → |
| Bps-2-15  | NZ_AAMB01000012.1 | - | 34759  | 34717  | (shown above)                                                                                                                  |
| Bps-2-12  | NZ_AAMB01000012.1 | - | 34710  | 34668  | (shown above)                                                                                                                  |
| Bps-2-5   | NZ_AAMB01000012.1 | - | 34661  | 34619  | (shown above)                                                                                                                  |
| Bps-2-2   | NZ_AAMB01000012.1 | - | 34612  | 34570  | (shown above)                                                                                                                  |
| Bps-2-3   | NZ_AAMB01000012.1 | - | 34563  | 34521  | (shown above)                                                                                                                  |
| Bps-6-18  | NZ_AAMM02000020.1 | + | 65168  | 65210  | RNA → RNA → RNA → RNA → RNA → RNA → SoxD (pfam04267) → GcvT (COG0404) HcaD (COG0446) →<br>COG4583 (COG4583) → FolB (COG1539) → |
| Bps-6-17  | NZ_AAMM02000020.1 | + | 65217  | 65259  | (shown above)                                                                                                                  |
| Bps-6-14  | NZ_AAMM02000020.1 | + | 65266  | 65308  | (shown above)                                                                                                                  |
| Bps-6-2   | NZ_AAMM02000020.1 | + | 65364  | 65406  | (shown above)                                                                                                                  |
| Bps-6-3   | NZ_AAMM02000020.1 | + | 65413  | 65455  | (shown above)                                                                                                                  |
| Bps-6-4   | NZ_AAMM02000020.1 | + | 65462  | 65504  | (shown above)                                                                                                                  |
| Bps-9-20  | NZ_AAHV02000019.1 | + | 108142 | 108184 | RNA → RNA → RNA → RNA → Acs (COG0365) →                                                                                        |
| Bps-9-17  | NZ_AAHV02000019.1 | + | 108191 | 108233 | (shown above)                                                                                                                  |
| Bps-9-10  | NZ_AAHV02000019.1 | + | 108240 | 108282 | (shown above)                                                                                                                  |
| Bps-9-11  | NZ_AAHV02000019.1 | + | 108289 | 108331 | (shown above)                                                                                                                  |
| Bps-10-16 | NZ_AAHW02000030.1 | - | 25522  | 25480  | RNA → RNA → RNA → RNA → RNA → RNA → Acs (COG0365) →                                                                            |
| Bps-10-11 | NZ_AAHW02000030.1 | - | 25424  | 25382  | (shown above)                                                                                                                  |
| Bps-10-7  | NZ_AAHW02000030.1 | - | 25228  | 25186  | (shown above)                                                                                                                  |
| Bps-10-12 | NZ_AAHW02000030.1 | - | 25277  | 25235  | (shown above)                                                                                                                  |
| Bps-10-15 | NZ_AAHW02000030.1 | - | 25375  | 25333  | (shown above)                                                                                                                  |
| Bps-10-22 | NZ_AAHW02000030.1 | - | 25326  | 25284  | (shown above)                                                                                                                  |
| Bps-1-22  | NZ_AAMA01000020.1 | - | 25550  | 25508  | RNA → RNA → RNA → RNA → RNA → Acs (COG0365) →                                                                                  |
| Bps-1-21  | NZ_AAMA01000020.1 | - | 25452  | 25410  | (shown above)                                                                                                                  |

|          |                    |   |         |         |                                                                                                                                                       |
|----------|--------------------|---|---------|---------|-------------------------------------------------------------------------------------------------------------------------------------------------------|
| Bps-1-17 | NZ_AAAMA01000020.1 | - | 25403   | 25361   | (shown above)                                                                                                                                         |
| Bps-1-12 | NZ_AAAMA01000020.1 | - | 25354   | 25312   | (shown above)                                                                                                                                         |
| Bps-1-23 | NZ_AAAMA01000020.1 | - | 25501   | 25459   | (shown above)                                                                                                                                         |
| Bps-2-18 | NZ_AAAMB01000024.1 | - | 25325   | 25283   | <b>RNA</b> → <b>RNA</b> → <b>RNA</b> → <b>RNA</b> → <b>RNA</b> → <b>Acs (COG0365)</b> →                                                               |
| Bps-2-17 | NZ_AAAMB01000024.1 | - | 25227   | 25185   | (shown above)                                                                                                                                         |
| Bps-2-14 | NZ_AAAMB01000024.1 | - | 25178   | 25136   | (shown above)                                                                                                                                         |
| Bps-2-10 | NZ_AAAMB01000024.1 | - | 25129   | 25087   | (shown above)                                                                                                                                         |
| Bps-2-19 | NZ_AAAMB01000024.1 | - | 25276   | 25234   | (shown above)                                                                                                                                         |
| Bps-5-13 | NC_007435.1        | + | 2662751 | 2662793 | <b>RNA</b> → <b>RNA</b> → <b>RNA</b> → <b>Aldedh (pfam00171)</b> → <b>Acs (COG0365)</b> →                                                             |
| Bps-5-10 | NC_007435.1        | + | 2662800 | 2662842 | (shown above)                                                                                                                                         |
| Bps-5-7  | NC_007435.1        | + | 2662849 | 2662891 | (shown above)                                                                                                                                         |
| Bps-4-13 | NZ_AAHS02000001.1  | + | 338933  | 338975  | <b>RNA</b> → <b>RNA</b> → <b>RNA</b> → <b>Acs (COG0365)</b> →                                                                                         |
| Bps-4-10 | NZ_AAHS02000001.1  | + | 338982  | 339024  | (shown above)                                                                                                                                         |
| Bps-4-7  | NZ_AAHS02000001.1  | + | 339031  | 339073  | (shown above)                                                                                                                                         |
| Bps-7-19 | NZ_AAHU01000026.1  | + | 73849   | 73891   | <b>RNA</b> → <b>Acs (COG0365)</b> →                        |
| Bps-7-15 | NZ_AAHU01000026.1  | + | 73898   | 73940   | (shown above)                                                                                                                                         |
| Bps-7-11 | NZ_AAHU01000026.1  | + | 74143   | 74185   | (shown above)                                                                                                                                         |
| Bps-7-12 | NZ_AAHU01000026.1  | + | 74192   | 74234   | (shown above)                                                                                                                                         |
| Bps-7-13 | NZ_AAHU01000026.1  | + | 74241   | 74283   | (shown above)                                                                                                                                         |
| Bps-7-16 | NZ_AAHU01000026.1  | + | 74094   | 74136   | (shown above)                                                                                                                                         |
| Bps-7-17 | NZ_AAHU01000026.1  | + | 74045   | 74087   | (shown above)                                                                                                                                         |
| Bps-7-18 | NZ_AAHU01000026.1  | + | 73947   | 73989   | (shown above)                                                                                                                                         |
| Bps-6-20 | NZ_AAMM02000026.1  | + | 42501   | 42543   | <b>RNA</b> → <b>RNA</b> → <b>RNA</b> → <b>RNA</b> → <b>RNA</b> → <b>Acs (COG0365)</b> →                                                               |
| Bps-6-19 | NZ_AAMM02000026.1  | + | 42599   | 42641   | (shown above)                                                                                                                                         |
| Bps-6-16 | NZ_AAMM02000026.1  | + | 42648   | 42690   | (shown above)                                                                                                                                         |
| Bps-6-11 | NZ_AAMM02000026.1  | + | 42697   | 42739   | (shown above)                                                                                                                                         |
| Bps-6-21 | NZ_AAMM02000026.1  | + | 42550   | 42592   | (shown above)                                                                                                                                         |
| Bps-3-16 | NZ_AAHR02000013.1  | + | 105461  | 105503  | <b>RNA</b> → <b>RNA</b> → <b>RNA</b> → <b>RNA</b> → <b>RNA</b> → <b>Acs (COG0365)</b> →                                                               |
| Bps-3-15 | NZ_AAHR02000013.1  | + | 105559  | 105601  | (shown above)                                                                                                                                         |
| Bps-3-11 | NZ_AAHR02000013.1  | + | 105608  | 105650  | (shown above)                                                                                                                                         |
| Bps-3-9  | NZ_AAHR02000013.1  | + | 105657  | 105699  | (shown above)                                                                                                                                         |
| Bps-3-23 | NZ_AAHR02000013.1  | + | 105510  | 105552  | (shown above)                                                                                                                                         |
| Bps-3-17 | NZ_AAHR02000003.1  | + | 89234   | 89276   | <b>RNA</b> → <b>GcvP (COG0403)</b> <b>GcvP (COG1003)</b> → |
| Bps-3-6  | NZ_AAHR02000003.1  | + | 89528   | 89570   | (shown above)                                                                                                                                         |
| Bps-3-1  | NZ_AAHR02000003.1  | + | 89577   | 89619   | (shown above)                                                                                                                                         |
| Bps-3-2  | NZ_AAHR02000003.1  | + | 89626   | 89668   | (shown above)                                                                                                                                         |
| Bps-3-18 | NZ_AAHR02000003.1  | + | 89332   | 89374   | (shown above)                                                                                                                                         |
| Bps-3-19 | NZ_AAHR02000003.1  | + | 89381   | 89423   | (shown above)                                                                                                                                         |
| Bps-3-20 | NZ_AAHR02000003.1  | + | 89283   | 89325   | (shown above)                                                                                                                                         |
| Bps-3-21 | NZ_AAHR02000003.1  | + | 89430   | 89472   | (shown above)                                                                                                                                         |
| env-43   | AACY01025908.1     | - | 5439    | 5397    | <b>RNA</b> → <b>unknown</b> →                                                                                                                         |
| Bce-1-9  | NC_008062.1        | + | 981750  | 981792  | <b>RNA</b> → <b>RNA</b> → <b>ExbD (COG0848)</b> → <b>hypo</b> →                                                                                       |
| Bce-1-1  | NC_008062.1        | + | 981848  | 981890  | (shown above)                                                                                                                                         |

|          |                   |   |         |         |                                                                                         |
|----------|-------------------|---|---------|---------|-----------------------------------------------------------------------------------------|
| Bce-2-9  | NZ_AAHL01000064.1 | - | 11010   | 10968   | RNA → RNA → ExbD (COG0848) → hypo →                                                     |
| Bce-2-1  | NZ_AAHL01000064.1 | - | 10912   | 10870   | (shown above)                                                                           |
| env-44   | AACY01057793.1    | + | 165527  | 165569  | RNA → unknown →                                                                         |
| Bxe-1-17 | NC_007953.1       | + | 1336341 | 1336383 | RNA → PL2_Passenger_AT (cd01344)Autotransporter (pfam03797) →                           |
| env-45   | AACY01118859.1    | - | 327708  | 327666  | RNA → RNA → unknown → unknown →                                                         |
| env-23   | AACY01118859.1    | - | 327659  | 327617  | (shown above)                                                                           |
| env-46   | AACY01205166.1    | + | 357     | 399     | RNA → RNA → unknown →                                                                   |
| env-24   | AACY01205166.1    | + | 406     | 448     | (shown above)                                                                           |
| env-47   | AACY01218275.1    | - | 449     | 407     | RNA → RNA → unknown →                                                                   |
| env-25   | AACY01218275.1    | - | 400     | 358     | (shown above)                                                                           |
| env-48   | AACY01219723.1    | + | 288     | 330     | RNA → RNA → unknown →                                                                   |
| env-26   | AACY01219723.1    | + | 337     | 379     | (shown above)                                                                           |
| env-49   | AACY01247047.1    | - | 481     | 439     | RNA → RNA → unknown →                                                                   |
| env-27   | AACY01247047.1    | - | 432     | 390     | (shown above)                                                                           |
| Bxe-1-18 | NC_007953.1       | + | 273812  | 273854  | RNA → FixB (COG2025) →                                                                  |
| Bam-1-7  | NZ_AAJL01000025.1 | + | 5415    | 5457    | RNA → LldP (COG1620) →                                                                  |
| Bsp-1-12 | NC_007510.1       | - | 2952347 | 2952305 | RNA → NadA (pfam02445) → QPRTase (cd01572) →                                            |
| Bam-1-8  | NZ_AAJL01000006.1 | - | 158281  | 158238  | RNA → RNA → NadA (pfam02445) → QPRTase (cd01572) →                                      |
| Bam-1-6  | NZ_AAJL01000006.1 | - | 158181  | 158139  | (shown above)                                                                           |
| Bdo-1-15 | NZ_AAKY01000038.1 | + | 91564   | 91607   | RNA → thiolase (cd00751) →                                                              |
| Bce-1-11 | NC_008062.1       | + | 467834  | 467877  | RNA → COG4757 (COG4757) →                                                               |
| Bce-2-11 | NZ_AAHL01000021.1 | + | 100704  | 100747  | RNA → COG4757 (COG4757) →                                                               |
| Bce-3-8  | NZ_AAKX01000082.1 | + | 51305   | 51348   | RNA → COG4757 (COG4757) →                                                               |
| Bce-3-9  | NZ_AAKX01000001.1 | + | 109240  | 109282  | RNA → RNA → RNA → ExbD (COG0848) → hypo →                                               |
| Bce-3-1  | NZ_AAKX01000001.1 | + | 109289  | 109331  | (shown above)                                                                           |
| Bce-3-10 | NZ_AAKX01000001.1 | + | 109338  | 109380  | (shown above)                                                                           |
| Bps-7-26 | NZ_AAHU01000003.1 | + | 19371   | 19414   | RNA → RNA → RNA → RNA → RNA → COG4319 (COG4319) →                                       |
| Bps-7-1  | NZ_AAHU01000003.1 | + | 19421   | 19463   | (shown above)                                                                           |
| Bps-7-2  | NZ_AAHU01000003.1 | + | 19470   | 19512   | (shown above)                                                                           |
| Bps-7-3  | NZ_AAHU01000003.1 | + | 19519   | 19561   | (shown above)                                                                           |
| Bps-7-4  | NZ_AAHU01000003.1 | + | 19568   | 19610   | (shown above)                                                                           |
| Bsp-1-15 | NC_007510.1       | - | 2484166 | 2484124 | RNA → MhpC (COG0596) →                                                                  |
| Bxe-1-19 | NC_007952.1       | - | 3334149 | 3334107 | RNA → AcyP (COG1254) →                                                                  |
| Bxe-1-20 | NC_007951.1       | - | 4695181 | 4695139 | RNA → FlgC (COG1558) → FlgD (COG1843) → FlgE (COG1749)FlgG (COG4786) → FlgF (COG4787) → |
| Bxe-1-21 | NC_007951.1       | + | 3085495 | 3085537 | FlgG (COG4786) →                                                                        |
| env-53   | AACY01015268.1    | - | 131492  | 131450  | RNA → AceA (COG2224) →                                                                  |
| env-51   | AACY01015268.1    | - | 131394  | 131352  | RNA → RNA → RNA → RNA → RNA → unknown →                                                 |
| env-12   | AACY01015268.1    | - | 131296  | 131254  | (shown above)                                                                           |
| env-52   | AACY01015268.1    | - | 131345  | 131303  | (shown above)                                                                           |
| env-54   | AACY01015268.1    | - | 131443  | 131401  | (shown above)                                                                           |
| Bsp-1-16 | NC_007511.1       | - | 792372  | 792330  | RNA → RNA → AcoR (COG3284) → fer2 (cd00207) → hypo →                                    |
| Bsp-1-5  | NC_007511.1       | - | 792323  | 792281  | (shown above)                                                                           |
| env-56   | AACY01058207.1    | - | 414     | 372     | RNA →                                                                                   |

|                       |                   |   |         |         |                                                                                                                    |
|-----------------------|-------------------|---|---------|---------|--------------------------------------------------------------------------------------------------------------------|
| Bvi-1-2               | NZ_AAEH02000034.1 | - | 65957   | 65914   | RNA → TrpA (COG0159) → AccD (COG0777) →                                                                            |
| Bth-1-12              | NC_007650.1       | - | 2177506 | 2177464 | RNA → RNA → RNA → RNA → Acs (COG0365) → Aldedh (pfam00171) → MmsB (COG2084) →<br>CaiD (COG1024) → CaiD (COG1024) → |
| Bth-1-11              | NC_007650.1       | - | 2177408 | 2177366 | (shown above)                                                                                                      |
| Bth-1-2               | NC_007650.1       | - | 2177359 | 2177317 | (shown above)                                                                                                      |
| Bth-1-3               | NC_007650.1       | - | 2177310 | 2177268 | (shown above)                                                                                                      |
| env-57                | AACY01077631.1    | - | 84681   | 84639   | RNA → RNA → unknown → unknown → unknown → unknown →                                                                |
| env-55                | AACY01077631.1    | - | 84632   | 84590   | (shown above)                                                                                                      |
| Bsp-1-17              | NC_007511.1       | + | 2165800 | 2165842 | RNA → ← DadA (COG0665)                                                                                             |
| env-58                | AACY01084398.1    | + | 134115  | 134157  | RNA → RNA → unknown →                                                                                              |
| env-59                | AACY01084398.1    | + | 134164  | 134206  | (shown above)                                                                                                      |
| env-62                | AACY01174822.1    | + | 336     | 378     | RNA →                                                                                                              |
| env-63                | AACY01198017.1    | - | 285     | 243     | RNA →                                                                                                              |
| env-66                | AACY01174822.1    | + | 385     | 427     | RNA →                                                                                                              |
| env-67                | AACY01198017.1    | - | 236     | 194     | RNA →                                                                                                              |
| Bce-1-12              | NC_008060.1       | + | 1998352 | 1998394 | RNA → UhpC (COG2271) →                                                                                             |
| Bce-2-12              | NZ_AAHL01000002.1 | - | 68714   | 68672   | RNA → UhpC (COG2271) →                                                                                             |
| Bxe-1-22              | NC_007951.1       | + | 2205005 | 2205047 | RNA → RNA → LysR (COG0583) →                                                                                       |
| Bxe-1-11              | NC_007951.1       | + | 2205103 | 2205145 | (shown above)                                                                                                      |
| Bsp-1-18              | NC_007511.1       | + | 154791  | 154833  | RNA → GltA (COG0372) → AcnA (COG1048) → DUF453 (pfam04303) →                                                       |
| Bxe-1-24              | NC_007952.1       | - | 2349464 | 2349422 | RNA → RNA → Sugar_tr (pfam00083) →                                                                                 |
| Bxe-1-23              | NC_007952.1       | - | 2349364 | 2349322 | (shown above)                                                                                                      |
| Bce-3-11              | NZ_AAKX01000077.1 | - | 19064   | 19022   | RNA → UhpC (COG2271) →                                                                                             |
| Bps-8-22              | NC_006350.1       | - | 4034545 | 4034503 | RNA → RNA → RNA → ATP-synt_DE_N (pfam02823) →                                                                      |
| Bps-8-8               | NC_006350.1       | - | 4034452 | 4034410 | (shown above)                                                                                                      |
| Bps-8-24              | NC_006350.1       | - | 4034497 | 4034457 | (shown above)                                                                                                      |
| Bma-4-9               | NC_006348.1       | + | 3049507 | 3049549 | RNA → RNA → RNA → RNA → ATP-synt_DE_N (pfam02823) →                                                                |
| Bma-4-5               | NC_006348.1       | + | 3049786 | 3049828 | (shown above)                                                                                                      |
| Bma-4-11              | NC_006348.1       | + | 3049741 | 3049781 | (shown above)                                                                                                      |
| <sup>4</sup> Bma-4-12 | NC_006348.1       | + | 3049552 | 3049595 | (shown above)                                                                                                      |
| Bma-1-9               | NZ_AAHM02000001.1 | - | 1628401 | 1628359 | RNA → RNA → RNA → RNA → ATP-synt_DE_N (pfam02823) →                                                                |
| Bma-1-5               | NZ_AAHM02000001.1 | - | 1628122 | 1628080 | (shown above)                                                                                                      |
| Bma-1-11              | NZ_AAHM02000001.1 | - | 1628167 | 1628127 | (shown above)                                                                                                      |
| Bma-1-12              | NZ_AAHM02000001.1 | - | 1628356 | 1628313 | (shown above)                                                                                                      |
| Bma-2-9               | NZ_AAHN02000006.1 | - | 100548  | 100506  | RNA → RNA → RNA → RNA → ATP-synt_DE_N (pfam02823) →                                                                |
| Bma-2-5               | NZ_AAHN02000006.1 | - | 100269  | 100227  | (shown above)                                                                                                      |
| Bma-2-11              | NZ_AAHN02000006.1 | - | 100314  | 100274  | (shown above)                                                                                                      |
| Bma-2-12              | NZ_AAHN02000006.1 | - | 100503  | 100460  | (shown above)                                                                                                      |
| Bma-6-9               | NZ_AAHO01000007.1 | + | 62144   | 62186   | RNA → RNA → RNA → RNA → ATP-synt_DE_N (pfam02823) →                                                                |
| Bma-6-5               | NZ_AAHO01000007.1 | + | 62423   | 62465   | (shown above)                                                                                                      |
| Bma-6-11              | NZ_AAHO01000007.1 | + | 62378   | 62418   | (shown above)                                                                                                      |
| Bma-6-12              | NZ_AAHO01000007.1 | + | 62189   | 62232   | (shown above)                                                                                                      |
| Bma-8-12              | NZ_AAHP01000038.1 | + | 54905   | 54947   | RNA → RNA → RNA → RNA → ATP-synt_DE_N (pfam02823) →                                                                |
| Bma-8-7               | NZ_AAHP01000038.1 | + | 55184   | 55226   | (shown above)                                                                                                      |



|           |                   |   |        |        |                                                                                                                                            |
|-----------|-------------------|---|--------|--------|--------------------------------------------------------------------------------------------------------------------------------------------|
| Bma-8-14  | NZ_AAHP01000038.1 | + | 55139  | 55179  | (shown above)                                                                                                                              |
| Bma-8-15  | NZ_AAHP01000038.1 | + | 54950  | 54993  | (shown above)                                                                                                                              |
| Bma-9-9   | NZ_AAHQ02000003.1 | - | 154865 | 154823 | <b>RNA</b> → <b>RNA</b> → <b>RNA</b> → <b>RNA</b> → <b>ATP-synt_DE_N (pfam02823)</b> →                                                     |
| Bma-9-5   | NZ_AAHQ02000003.1 | - | 154586 | 154544 | (shown above)                                                                                                                              |
| Bma-9-11  | NZ_AAHQ02000003.1 | - | 154631 | 154591 | (shown above)                                                                                                                              |
| Bma-9-12  | NZ_AAHQ02000003.1 | - | 154820 | 154777 | (shown above)                                                                                                                              |
| Bps-3-24  | NZ_AAHR02000003.1 | - | 137592 | 137550 | <b>RNA</b> → <b>RNA</b> → <b>RNA</b> → <b>RNA</b> → <b>RNA</b> → <b>ATP-synt_DE_N (pfam02823)</b> →                                        |
| Bps-3-12  | NZ_AAHR02000003.1 | - | 137500 | 137458 | (shown above)                                                                                                                              |
| Bps-3-10  | NZ_AAHR02000003.1 | - | 137407 | 137365 | (shown above)                                                                                                                              |
| Bps-3-8   | NZ_AAHR02000003.1 | - | 137314 | 137272 | (shown above)                                                                                                                              |
| Bps-3-26  | NZ_AAHR02000003.1 | - | 137359 | 137319 | (shown above)                                                                                                                              |
| Bps-7-27  | NZ_AAHU01000007.1 | - | 161243 | 161201 | <b>RNA</b> → <b>RNA</b> → <b>RNA</b> → <b>RNA</b> → <b>ATP-synt_DE_N (pfam02823)</b> →                                                     |
| Bps-7-14  | NZ_AAHU01000007.1 | - | 161151 | 161109 | (shown above)                                                                                                                              |
| Bps-7-10  | NZ_AAHU01000007.1 | - | 161058 | 161016 | (shown above)                                                                                                                              |
| Bps-7-28  | NZ_AAHU01000007.1 | - | 161103 | 161063 | (shown above)                                                                                                                              |
| Bps-9-27  | NZ_AAHV02000003.1 | - | 148230 | 148188 | <b>RNA</b> → <b>ATP-synt_DE_N (pfam02823)</b> → |
| Bps-9-12  | NZ_AAHV02000003.1 | - | 148137 | 148095 | (shown above)                                                                                                                              |
| Bps-9-9   | NZ_AAHV02000003.1 | - | 147951 | 147909 | (shown above)                                                                                                                              |
| Bps-9-14  | NZ_AAHV02000003.1 | - | 147858 | 147816 | (shown above)                                                                                                                              |
| Bps-9-13  | NZ_AAHV02000003.1 | - | 148044 | 148002 | (shown above)                                                                                                                              |
| Bps-9-29  | NZ_AAHV02000003.1 | - | 147996 | 147956 | (shown above)                                                                                                                              |
| Bps-9-31  | NZ_AAHV02000003.1 | - | 148089 | 148049 | (shown above)                                                                                                                              |
| Bps-9-30  | NZ_AAHV02000003.1 | - | 148182 | 148142 | (shown above)                                                                                                                              |
| Bps-10-24 | NZ_AAHW02000024.1 | + | 2266   | 2308   | <b>RNA</b> → <b>ATP-synt_DE_N (pfam02823)</b> →              |
| Bps-10-8  | NZ_AAHW02000024.1 | + | 2359   | 2401   | (shown above)                                                                                                                              |
| Bps-10-6  | NZ_AAHW02000024.1 | + | 2545   | 2587   | (shown above)                                                                                                                              |
| Bps-10-9  | NZ_AAHW02000024.1 | + | 2452   | 2494   | (shown above)                                                                                                                              |
| Bps-10-26 | NZ_AAHW02000024.1 | + | 2500   | 2540   | (shown above)                                                                                                                              |
| Bps-10-28 | NZ_AAHW02000024.1 | + | 2407   | 2447   | (shown above)                                                                                                                              |
| Bps-10-27 | NZ_AAHW02000024.1 | + | 2314   | 2354   | (shown above)                                                                                                                              |
| Bma-5-9   | NZ_AAIQ02000004.1 | + | 55075  | 55117  | <b>RNA</b> → <b>RNA</b> → <b>RNA</b> → <b>RNA</b> → <b>ATP-synt_DE_N (pfam02823)</b> →                                                     |
| Bma-5-5   | NZ_AAIQ02000004.1 | + | 55354  | 55396  | (shown above)                                                                                                                              |
| Bma-5-11  | NZ_AAIQ02000004.1 | + | 55309  | 55349  | (shown above)                                                                                                                              |
| Bma-5-12  | NZ_AAIQ02000004.1 | + | 55120  | 55163  | (shown above)                                                                                                                              |
| Bma-7-9   | NZ_AAIR02000013.1 | + | 2460   | 2502   | <b>RNA</b> → <b>RNA</b> → <b>RNA</b> → <b>RNA</b> → <b>ATP-synt_DE_N (pfam02823)</b> →                                                     |
| Bma-7-5   | NZ_AAIR02000013.1 | + | 2739   | 2781   | (shown above)                                                                                                                              |
| Bma-7-11  | NZ_AAIR02000013.1 | + | 2694   | 2734   | (shown above)                                                                                                                              |
| Bma-7-12  | NZ_AAIR02000013.1 | + | 2505   | 2548   | (shown above)                                                                                                                              |
| Bps-1-32  | NZ_AAMA01000004.1 | - | 108193 | 108151 | <b>RNA</b> → <b>RNA</b> → <b>RNA</b> → <b>RNA</b> → <b>ATP-synt_DE_N (pfam02823)</b> →                                                     |
| Bps-1-13  | NZ_AAMA01000004.1 | - | 108101 | 108059 | (shown above)                                                                                                                              |
| Bps-1-11  | NZ_AAMA01000004.1 | - | 108008 | 107966 | (shown above)                                                                                                                              |
| Bps-1-34  | NZ_AAMA01000004.1 | - | 108053 | 108013 | (shown above)                                                                                                                              |
| Bps-2-28  | NZ_AAMB01000197.1 | + | 95373  | 95415  | <b>RNA</b> → <b>RNA</b> → <b>RNA</b> → <b>RNA</b> → <b>ATP-synt_DE_N (pfam02823)</b> →                                                     |

|          |                    |   |         |         |                                                                                                                                                 |
|----------|--------------------|---|---------|---------|-------------------------------------------------------------------------------------------------------------------------------------------------|
| Bps-2-11 | NZ_AAAMB01000197.1 | + | 95465   | 95507   | (shown above)                                                                                                                                   |
| Bps-2-9  | NZ_AAAMB01000197.1 | + | 95558   | 95600   | (shown above)                                                                                                                                   |
| Bps-2-30 | NZ_AAAMB01000197.1 | + | 95513   | 95553   | (shown above)                                                                                                                                   |
| Bps-6-27 | NZ_AAAMM02000015.1 | + | 49612   | 49654   | RNA → ATP-synt_DE_N (pfam02823) →                                                                           |
| Bps-6-12 | NZ_AAAMM02000015.1 | + | 49705   | 49747   | (shown above)                                                                                                                                   |
| Bps-6-10 | NZ_AAAMM02000015.1 | + | 49891   | 49933   | (shown above)                                                                                                                                   |
| Bps-6-13 | NZ_AAAMM02000015.1 | + | 49798   | 49840   | (shown above)                                                                                                                                   |
| Bps-6-29 | NZ_AAAMM02000015.1 | + | 49846   | 49886   | (shown above)                                                                                                                                   |
| Bps-6-31 | NZ_AAAMM02000015.1 | + | 49753   | 49793   | (shown above)                                                                                                                                   |
| Bps-6-30 | NZ_AAAMM02000015.1 | + | 49660   | 49700   | (shown above)                                                                                                                                   |
| Bma-3-9  | NZ_AAANX02000011.1 | + | 99386   | 99428   | RNA → RNA → RNA → RNA → ATP-synt_DE_N (pfam02823) →                                                                                             |
| Bma-3-5  | NZ_AAANX02000011.1 | + | 99665   | 99707   | (shown above)                                                                                                                                   |
| Bma-3-11 | NZ_AAANX02000011.1 | + | 99620   | 99660   | (shown above)                                                                                                                                   |
| Bma-3-12 | NZ_AAANX02000011.1 | + | 99431   | 99474   | (shown above)                                                                                                                                   |
| Bps-4-20 | NZ_AAHS02000111.1  | - | 6443    | 6401    | RNA → RNA → RNA → RNA → ATP-synt_DE_N (pfam02823) →                                                                                             |
| Bps-4-5  | NZ_AAHS02000111.1  | - | 6351    | 6309    | (shown above)                                                                                                                                   |
| Bps-4-6  | NZ_AAHS02000111.1  | - | 6258    | 6216    | (shown above)                                                                                                                                   |
| Bps-4-22 | NZ_AAHS02000111.1  | - | 6303    | 6263    | (shown above)                                                                                                                                   |
| Bce-3-12 | NZ_AAKX01000081.1  | + | 57358   | 57400   | RNA → RNA → COG2866 (COG2866) →                                                                                                                 |
| Bce-3-2  | NZ_AAKX01000081.1  | + | 57407   | 57449   | (shown above)                                                                                                                                   |
| Bsp-1-19 | NC_007510.1        | - | 819745  | 819703  | RNA → RNA → GCD (cd01151) →                                                                                                                     |
| Bsp-1-4  | NC_007510.1        | - | 819647  | 819605  | (shown above)                                                                                                                                   |
| Bvi-1-3  | NZ_AAEOH02000010.1 | + | 42925   | 42967   | RNA → Sugar_tr (pfam00083) → DHDPS-like (cd00408) → MviM (COG0673) → RbsB (COG1879) →<br>MglA (COG1129) → AraH (COG1172) → SMP-30 (pfam03758) → |
| Bce-1-13 | NC_008062.1        | - | 81313   | 81271   | RNA → COG4770 (COG4770) AHS1 (pfam02682) AccB (COG0511) →                                                                                       |
| Bce-2-13 | NZ_AAHL01000006.1  | - | 89378   | 89336   | RNA → COG4770 (COG4770) AHS1 (pfam02682) AccB (COG0511) → Amidase (pfam01425) → TauC (COG0600) →<br>ABC_NrtD_SsuB_transporters (cd03293) →      |
| Bsp-1-20 | NC_007510.1        | + | 3594427 | 3594469 | RNA → hypo →                                                                                                                                    |
| Bxe-1-25 | NC_007951.1        | - | 3173059 | 3173016 | RNA → Eno (COG0148) →                                                                                                                           |
| Bxe-1-26 | NC_007951.1        | + | 3250414 | 3250456 | RNA → DUF495 (pfam04362) → hypo → Sugar_tr (pfam00083) →                                                                                        |
| Bsp-1-22 | NC_007510.1        | + | 3000900 | 3000942 | RNA → RNA → adh_short (pfam00106) →                                                                                                             |
| Bsp-1-21 | NC_007510.1        | + | 3000950 | 3000992 | (shown above)                                                                                                                                   |
| env-69   | AACY01057792.1     | - | 35437   | 35395   | RNA → RNA → RNA → RNA → RNA → RNA → unknown →                                                                                                   |
| env-60   | AACY01057792.1     | - | 35388   | 35346   | (shown above)                                                                                                                                   |
| env-30   | AACY01057792.1     | - | 35290   | 35248   | (shown above)                                                                                                                                   |
| env-13   | AACY01057792.1     | - | 35241   | 35199   | (shown above)                                                                                                                                   |
| env-16   | AACY01057792.1     | - | 35192   | 35150   | (shown above)                                                                                                                                   |
| env-64   | AACY01057792.1     | - | 35339   | 35297   | (shown above)                                                                                                                                   |
| env-71   | AACY01174822.1     | + | 287     | 329     | RNA →                                                                                                                                           |
| env-72   | AACY01198017.1     | - | 334     | 292     | RNA →                                                                                                                                           |
| Bsp-1-23 | NC_007510.1        | - | 2060448 | 2060406 | RNA → PurR (COG1609) → COG4377 (COG4377) → hypo →                                                                                               |
| Bdo-1-16 | NZ_AAKY01000189.1  | - | 11327   | 11285   | RNA → GltA (COG0372) → AcnA (COG1048) → DUF453 (pfam04303) → CaiB (COG1804) →                                                                   |
| Bxe-1-27 | NC_007951.1        | - | 4181410 | 4181367 | RNA → DHBP_synthase (pfam00926) →                                                                                                               |

|                       |                   |   |         |         |                                                                                                                                                                                 |
|-----------------------|-------------------|---|---------|---------|---------------------------------------------------------------------------------------------------------------------------------------------------------------------------------|
| Bth-1-13              | NC_007650.1       | + | 577773  | 577815  | RNA → Ring_hydroxylating_alpha (cd00680)Rieske_RO_Alpha_N (cd03469) → ring_hydroxylating_dioxygenases_beta (cd00667) → Rieske_RO_ferredoxin (cd03528) → Pyr_redox (pfam00070) → |
| Bsp-1-24              | NC_007510.1       | - | 843927  | 843885  | RNA → ←XdhB (COG4631)                                                                                                                                                           |
| <sup>3</sup> Bth-1-14 | NC_007651.1       | + | 894209  | 894250  | RNA → NadA (pfam02445) → QPRTase (cd01572) →                                                                                                                                    |
| Bth-1-15              | NC_007651.1       | + | 3261390 | 3261432 | RNA → ThiC (pfam01964) →                                                                                                                                                        |
| Bxe-1-28              | NC_007951.1       | + | 509233  | 509275  | RNA → Putative NAD(P) transhydrogenase subunit alpha → PNTB (pfam02233) →                                                                                                       |
| <sup>9</sup> Bsp-1-25 | NC_007511.1       | + | 809158  | 809200  | RNA → Acs (COG0365) →                                                                                                                                                           |
| Bxe-1-29              | NC_007951.1       | + | 3709602 | 3709644 | RNA → ←RpmF (COG0333)                                                                                                                                                           |
| Bce-3-13              | NZ_AAKX01000077.1 | - | 21741   | 21699   | RNA → RNA → RNA → RNA → PutA (COG1012) → adh_short (pfam00106) →                                                                                                                |
| Bce-3-7               | NZ_AAKX01000077.1 | - | 21643   | 21601   | (shown above)                                                                                                                                                                   |
| Bce-3-4               | NZ_AAKX01000077.1 | - | 21593   | 21551   | (shown above)                                                                                                                                                                   |
| Bce-3-5               | NZ_AAKX01000077.1 | - | 21543   | 21501   | (shown above)                                                                                                                                                                   |
| Bxe-1-30              | NC_007951.1       | - | 4807806 | 4807764 | RNA → AtpG (COG0224) →                                                                                                                                                          |
| env-73                | AACY01057790.1    | + | 17114   | 17156   | RNA → RNA → RNA → unknown → unknown →                                                                                                                                           |
| env-5                 | AACY01057790.1    | + | 17212   | 17254   | (shown above)                                                                                                                                                                   |
| env-4                 | AACY01057790.1    | + | 17261   | 17303   | (shown above)                                                                                                                                                                   |
| Bvi-1-4               | NZ_AAEH02000031.1 | - | 44042   | 44000   | RNA → RNA → NadA (pfam02445) → QPRTase (cd01572) →                                                                                                                              |
| Bvi-1-1               | NZ_AAEH02000031.1 | - | 43944   | 43902   | (shown above)                                                                                                                                                                   |
| env-74                | AACY01007479.1    | + | 104478  | 104520  | RNA → unknown →                                                                                                                                                                 |
| Bam-1-12              | NZ_AAJL01000007.1 | - | 93026   | 92984   | RNA → RNA → ATP-synt_DE_N (pfam02823) →                                                                                                                                         |
| Bam-1-9               | NZ_AAJL01000007.1 | - | 92934   | 92892   | (shown above)                                                                                                                                                                   |
| Bsp-1-26              | NC_007510.1       | - | 2572433 | 2572390 | RNA → RNA → COG4757 (COG4757) →                                                                                                                                                 |
| Bsp-1-30              | NC_007510.1       | - | 2572339 | 2572300 | (shown above)                                                                                                                                                                   |
| Bsp-1-27              | NC_007510.1       | + | 2849959 | 2850001 | RNA → RNA → RNA → RNA → RNA → PutA (COG1012) → adh_short (pfam00106) →                                                                                                          |
| Bsp-1-13              | NC_007510.1       | + | 2850057 | 2850099 | (shown above)                                                                                                                                                                   |
| Bsp-1-6               | NC_007510.1       | + | 2850204 | 2850246 | (shown above)                                                                                                                                                                   |
| Bsp-1-7               | NC_007510.1       | + | 2850253 | 2850295 | (shown above)                                                                                                                                                                   |
| Bsp-1-14              | NC_007510.1       | + | 2850155 | 2850197 | (shown above)                                                                                                                                                                   |
| Bsp-1-28              | NC_007511.1       | - | 3528699 | 3528657 | RNA → Sugar_tr (pfam00083) →                                                                                                                                                    |
| Bce-1-14              | NC_008062.1       | + | 549993  | 550035  | RNA → RNA → MhpC (COG0596) →                                                                                                                                                    |
| Bce-1-10              | NC_008062.1       | + | 550091  | 550133  | (shown above)                                                                                                                                                                   |
| Bce-2-14              | NZ_AAHL01000106.1 | - | 1038    | 996     | RNA → RNA → hypo → hypo →                                                                                                                                                       |
| Bce-2-10              | NZ_AAHL01000106.1 | - | 940     | 898     | (shown above)                                                                                                                                                                   |
| Bce-3-14              | NZ_AAKX01000083.1 | + | 46203   | 46245   | RNA → MhpC (COG0596) →                                                                                                                                                          |
| Bxe-1-31              | NC_007951.1       | - | 239435  | 239393  | RNA → RNA → RNA → SCAD/SBCAD (cd01158) → COG3012 (COG3012) →                                                                                                                    |
| Bxe-1-2               | NC_007951.1       | - | 239386  | 239344  | (shown above)                                                                                                                                                                   |
| Bxe-1-3               | NC_007951.1       | - | 239337  | 239295  | (shown above)                                                                                                                                                                   |
| Bdo-1-19              | NZ_AAKY01000054.1 | + | 16871   | 16913   | RNA → RNA → ACAD_fadE6_17_26 (cd01152) →                                                                                                                                        |
| Bdo-1-14              | NZ_AAKY01000054.1 | + | 16970   | 17013   | (shown above)                                                                                                                                                                   |
| Bce-1-15              | NC_008060.1       | + | 3284104 | 3284064 | RNA → BetA (COG2303) →                                                                                                                                                          |
| Bce-2-15              | NZ_AAHL01000003.1 | - | 212830  | 212790  | RNA → BetA (COG2303) →                                                                                                                                                          |
| Bps-8-23              | NC_006350.1       | + | 738466  | 738508  | RNA → RNA → thiolase (cd00751) → CaiD (COG1024) →                                                                                                                               |
| Bps-8-5               | NC_006350.1       | + | 738570  | 738612  | (shown above)                                                                                                                                                                   |
| Bps-5-21              | NC_007434.1       | + | 896083  | 896125  | RNA → RNA → thiolase (cd00751) →                                                                                                                                                |

|                       |                   |   |         |         |                                                         |
|-----------------------|-------------------|---|---------|---------|---------------------------------------------------------|
| Bps-5-4               | NC_007434.1       | + | 896187  | 896229  | (shown above)                                           |
| Bps-3-25              | NZ_AAHR02000045.1 | - | 54726   | 54684   | RNA → RNA → thiolase (cd00751) → CaiD (COG1024) →       |
| Bps-3-3               | NZ_AAHR02000045.1 | - | 54674   | 54632   | (shown above)                                           |
| Bps-4-21              | NZ_AAHS02000019.1 | + | 56711   | 56753   | RNA → RNA → thiolase (cd00751) → CaiD (COG1024) →       |
| Bps-4-4               | NZ_AAHS02000019.1 | + | 56815   | 56857   | (shown above)                                           |
| Bps-9-28              | NZ_AAHV02000004.1 | - | 23429   | 23387   | RNA → RNA → thiolase (cd00751) → CaiD (COG1024) →       |
| Bps-9-8               | NZ_AAHV02000004.1 | - | 23325   | 23283   | (shown above)                                           |
| Bps-10-25             | NZ_AAHW02000035.1 | - | 55229   | 55187   | RNA → RNA → RNA → thiolase (cd00751) → CaiD (COG1024) → |
| Bps-10-23             | NZ_AAHW02000035.1 | - | 55177   | 55135   | (shown above)                                           |
| Bps-10-3              | NZ_AAHW02000035.1 | - | 55125   | 55083   | (shown above)                                           |
| Bps-1-33              | NZ_AAMA01000003.1 | + | 192246  | 192288  | RNA → RNA → thiolase (cd00751) → CaiD (COG1024) →       |
| Bps-1-8               | NZ_AAMA01000003.1 | + | 192350  | 192392  | (shown above)                                           |
| Bps-2-29              | NZ_AAMB01000198.1 | + | 124014  | 124056  | RNA → RNA → thiolase (cd00751) → CaiD (COG1024) →       |
| Bps-2-6               | NZ_AAMB01000198.1 | + | 124118  | 124160  | (shown above)                                           |
| Bps-6-28              | NZ_AAMM02000059.1 | + | 14165   | 14207   | RNA → RNA → RNA → thiolase (cd00751) → CaiD (COG1024) → |
| Bps-6-5               | NZ_AAMM02000059.1 | + | 14321   | 14363   | (shown above)                                           |
| Bps-6-6               | NZ_AAMM02000059.1 | + | 14373   | 14415   | (shown above)                                           |
| Bma-4-10              | NC_006348.1       | + | 213794  | 213836  | RNA → RNA → thiolase (cd00751) → CaiD (COG1024) →       |
| Bma-4-3               | NC_006348.1       | + | 213898  | 213940  | (shown above)                                           |
| Bma-1-10              | NZ_AAHM02000001.1 | + | 2365557 | 2365599 | RNA → RNA → thiolase (cd00751) → CaiD (COG1024) →       |
| Bma-1-3               | NZ_AAHM02000001.1 | + | 2365661 | 2365703 | (shown above)                                           |
| Bma-2-10              | NZ_AAHN02000011.1 | - | 54795   | 54753   | RNA → RNA → thiolase (cd00751) → CaiD (COG1024) →       |
| Bma-2-3               | NZ_AAHN02000011.1 | - | 54691   | 54649   | (shown above)                                           |
| Bma-6-10              | NZ_AAHO01000031.1 | + | 2570    | 2612    | RNA → RNA → thiolase (cd00751) → CaiD (COG1024) →       |
| Bma-6-3               | NZ_AAHO01000031.1 | + | 2674    | 2716    | (shown above)                                           |
| Bma-8-13              | NZ_AAHP01000016.1 | + | 33498   | 33540   | RNA → RNA → thiolase (cd00751) → CaiD (COG1024) →       |
| Bma-8-5               | NZ_AAHP01000016.1 | + | 33602   | 33644   | (shown above)                                           |
| Bma-9-10              | NZ_AAHQ02000001.1 | + | 433035  | 433077  | RNA → RNA → thiolase (cd00751) → CaiD (COG1024) →       |
| Bma-9-3               | NZ_AAHQ02000001.1 | + | 433139  | 433181  | (shown above)                                           |
| Bma-5-10              | NZ_AAIQ02000007.1 | + | 87028   | 87070   | RNA → RNA → thiolase (cd00751) → CaiD (COG1024) →       |
| Bma-5-3               | NZ_AAIQ02000007.1 | + | 87132   | 87174   | (shown above)                                           |
| Bma-7-10              | NZ_AAIR02000005.1 | + | 86605   | 86647   | RNA → RNA → thiolase (cd00751) → CaiD (COG1024) →       |
| Bma-7-3               | NZ_AAIR02000005.1 | + | 86709   | 86751   | (shown above)                                           |
| Bma-3-10              | NZ_AANX02000057.1 | - | 23403   | 23361   | RNA → RNA → thiolase (cd00751) → CaiD (COG1024) →       |
| Bma-3-3               | NZ_AANX02000057.1 | - | 23299   | 23257   | (shown above)                                           |
| Bxe-1-32              | NC_007951.1       | - | 3373147 | 3373105 | RNA → hypo →                                            |
| <sup>1</sup> Bxe-1-33 | NC_007952.1       | + | 1362200 | 1362242 | RNA → REC (cd00156)BaeS (COG0642) →                     |
| Bce-1-16              | NC_008060.1       | - | 365461  | 365419  | RNA → RNA → GCD (cd01151) →                             |
| Bce-1-4               | NC_008060.1       | - | 365359  | 365317  | (shown above)                                           |
| Bce-2-16              | NZ_AAHL01000005.1 | + | 93999   | 94041   | RNA → RNA → GCD (cd01151) →                             |
| Bce-2-4               | NZ_AAHL01000005.1 | + | 94101   | 94143   | (shown above)                                           |
| Bce-3-15              | NZ_AAKX01000025.1 | + | 4237    | 4279    | RNA → RNA → GCD (cd01151) →                             |
| Bce-3-3               | NZ_AAKX01000025.1 | + | 4335    | 4377    | (shown above)                                           |

|                       |                   |   |         |         |                                                                                    |
|-----------------------|-------------------|---|---------|---------|------------------------------------------------------------------------------------|
| <sup>8</sup> Bth-1-16 | NC_007650.1       | - | 2493736 | 2493694 | RNA → 23S ribosomal RNA →                                                          |
| Bth-1-17              | NC_007651.1       | + | 1239634 | 1239676 | RNA → 23S ribosomal RNA →                                                          |
| Bth-1-18              | NC_007651.1       | - | 3528168 | 3528126 | RNA → 23S ribosomal RNA →                                                          |
| Bth-1-19              | NC_007651.1       | - | 3331232 | 3331190 | RNA → 23S ribosomal RNA →                                                          |
| Bsp-1-29              | NC_007510.1       | - | 2063173 | 2063131 | RNA → RNA → UhpC (COG2271) → LdhA (COG1052) →                                      |
| Bsp-1-2               | NC_007510.1       | - | 2063075 | 2063033 | (shown above)                                                                      |
| <sup>5</sup> Bxe-1-34 | NC_007951.1       | + | 2727968 | 2728011 | RNA → ←Lrp (COG1522)                                                               |
| Bth-1-20              | NC_007650.1       | - | 768907  | 768865  | RNA → MmgE_PrpD (pfam03972) → AcnA (COG1048) →                                     |
| Bam-1-13              | NZ_AAJL01000009.1 | - | 288481  | 288439  | RNA → RNA → AcoR (COG3284) → fer2 (cd00207) → DUF704 (pfam05146) →                 |
| Bam-1-10              | NZ_AAJL01000009.1 | - | 288383  | 288341  | (shown above)                                                                      |
| Bce-1-17              | NC_008060.1       | - | 2010050 | 2010008 | RNA → UbiE (COG2226) →                                                             |
| Bce-2-17              | NZ_AAHL01000002.1 | + | 57016   | 57058   | RNA → UbiE (COG2226) →                                                             |
| Bce-3-16              | NZ_AAKX01000077.1 | + | 7370    | 7412    | RNA → UbiE (COG2226) →                                                             |
| Bps-7-29              | NZ_AAHU01000004.1 | - | 32067   | 32026   | RNA → RNA → SoxD (pfam04267) → HcaD (COG0446) GcvT (COG0404) → COG4583 (COG4583) → |
| Bps-7-7               | NZ_AAHU01000004.1 | - | 31970   | 31928   | FolB (COG1539) →                                                                   |
| Bth-1-21              | NC_007651.1       | - | 3713376 | 3713333 | (shown above)                                                                      |
| Bth-1-10              | NC_007651.1       | - | 3713277 | 3713235 | RNA → RNA → RNA → GcvP (COG0403) GcvP (COG1003) →                                  |
| Bth-1-1               | NC_007651.1       | - | 3713179 | 3713137 | (shown above)                                                                      |
| Bma-4-13              | NC_006348.1       | - | 3099338 | 3099295 | RNA → RNA → RNA → RNA → GcvP (COG0403) GcvP (COG1003) →                            |
| Bma-4-8               | NC_006348.1       | - | 3099288 | 3099246 | (shown above)                                                                      |
| Bma-4-7               | NC_006348.1       | - | 3099239 | 3099197 | (shown above)                                                                      |
| Bma-4-4               | NC_006348.1       | - | 3099190 | 3099148 | (shown above)                                                                      |
| Bma-1-13              | NZ_AAHM02000001.1 | + | 1576998 | 1577041 | RNA → RNA → RNA → RNA → GcvP (COG0403) GcvP (COG1003) →                            |
| Bma-1-8               | NZ_AAHM02000001.1 | + | 1577048 | 1577090 | (shown above)                                                                      |
| Bma-1-7               | NZ_AAHM02000001.1 | + | 1577097 | 1577139 | (shown above)                                                                      |
| Bma-1-4               | NZ_AAHM02000001.1 | + | 1577146 | 1577188 | (shown above)                                                                      |
| Bma-2-13              | NZ_AAHN02000006.1 | + | 50744   | 50787   | RNA → RNA → RNA → RNA → GcvP (COG0403) GcvP (COG1003) →                            |
| Bma-2-8               | NZ_AAHN02000006.1 | + | 50794   | 50836   | (shown above)                                                                      |
| Bma-2-7               | NZ_AAHN02000006.1 | + | 50843   | 50885   | (shown above)                                                                      |
| Bma-2-4               | NZ_AAHN02000006.1 | + | 50892   | 50934   | (shown above)                                                                      |
| Bma-6-13              | NZ_AAHO01000007.1 | - | 111975  | 111932  | RNA → RNA → RNA → RNA → GcvP (COG0403) GcvP (COG1003) →                            |
| Bma-6-8               | NZ_AAHO01000007.1 | - | 111925  | 111883  | (shown above)                                                                      |
| Bma-6-7               | NZ_AAHO01000007.1 | - | 111876  | 111834  | (shown above)                                                                      |
| Bma-6-4               | NZ_AAHO01000007.1 | - | 111827  | 111785  | (shown above)                                                                      |
| Bma-8-16              | NZ_AAHP01000033.1 | + | 50690   | 50733   | RNA → RNA → RNA → RNA → GcvP (COG0403) GcvP (COG1003) →                            |
| Bma-8-11              | NZ_AAHP01000033.1 | + | 50740   | 50782   | (shown above)                                                                      |
| Bma-8-10              | NZ_AAHP01000033.1 | + | 50789   | 50831   | (shown above)                                                                      |
| Bma-8-6               | NZ_AAHP01000033.1 | + | 50838   | 50880   | (shown above)                                                                      |
| Bma-9-13              | NZ_AAHQ02000003.1 | + | 105093  | 105136  | RNA → RNA → RNA → RNA → GcvP (COG0403) GcvP (COG1003) →                            |
| Bma-9-8               | NZ_AAHQ02000003.1 | + | 105143  | 105185  | (shown above)                                                                      |
| Bma-9-7               | NZ_AAHQ02000003.1 | + | 105192  | 105234  | (shown above)                                                                      |
| Bma-9-4               | NZ_AAHQ02000003.1 | + | 105241  | 105283  | (shown above)                                                                      |
| Bma-5-13              | NZ_AAIQ02000004.1 | - | 104906  | 104863  | RNA → RNA → RNA → RNA → GcvP (COG0403) GcvP (COG1003) →                            |

|          |                   |   |         |         |                                                                                                                                                                                 |
|----------|-------------------|---|---------|---------|---------------------------------------------------------------------------------------------------------------------------------------------------------------------------------|
| Bma-5-8  | NZ_AAIQ02000004.1 | - | 104856  | 104814  | (shown above)                                                                                                                                                                   |
| Bma-5-7  | NZ_AAIQ02000004.1 | - | 104807  | 104765  | (shown above)                                                                                                                                                                   |
| Bma-5-4  | NZ_AAIQ02000004.1 | - | 104758  | 104716  | (shown above)                                                                                                                                                                   |
| Bma-7-13 | NZ_AAIR02000013.1 | - | 52291   | 52248   | <b>RNA</b> → <b>RNA</b> → <b>RNA</b> → <b>RNA</b> → <b>GcvP (COG0403)</b> <b>GcvP (COG1003)</b> →                                                                               |
| Bma-7-8  | NZ_AAIR02000013.1 | - | 52241   | 52199   | (shown above)                                                                                                                                                                   |
| Bma-7-7  | NZ_AAIR02000013.1 | - | 52192   | 52150   | (shown above)                                                                                                                                                                   |
| Bma-7-4  | NZ_AAIR02000013.1 | - | 52143   | 52101   | (shown above)                                                                                                                                                                   |
| Bma-3-13 | NZ_AANX02000007.1 | - | 17302   | 17259   | <b>RNA</b> → <b>RNA</b> → <b>RNA</b> → <b>RNA</b> → <b>GcvP (COG0403)</b> <b>GcvP (COG1003)</b> →                                                                               |
| Bma-3-8  | NZ_AANX02000007.1 | - | 17252   | 17210   | (shown above)                                                                                                                                                                   |
| Bma-3-7  | NZ_AANX02000007.1 | - | 17203   | 17161   | (shown above)                                                                                                                                                                   |
| Bma-3-4  | NZ_AANX02000007.1 | - | 17154   | 17112   | (shown above)                                                                                                                                                                   |
| Bps-8-25 | NC_006350.1       | + | 3986071 | 3986114 | <b>RNA</b> → <b>GcvP (COG0403)</b> <b>GcvP (COG1003)</b> → |
| Bps-8-18 | NC_006350.1       | + | 3986121 | 3986163 | (shown above)                                                                                                                                                                   |
| Bps-8-17 | NC_006350.1       | + | 3986170 | 3986212 | (shown above)                                                                                                                                                                   |
| Bps-8-6  | NC_006350.1       | + | 3986366 | 3986408 | (shown above)                                                                                                                                                                   |
| Bps-8-1  | NC_006350.1       | + | 3986513 | 3986555 | (shown above)                                                                                                                                                                   |
| Bps-8-7  | NC_006350.1       | + | 3986464 | 3986506 | (shown above)                                                                                                                                                                   |
| Bps-8-21 | NC_006350.1       | + | 3986415 | 3986457 | (shown above)                                                                                                                                                                   |
| Bps-8-19 | NC_006350.1       | + | 3986268 | 3986310 | (shown above)                                                                                                                                                                   |
| Bps-8-20 | NC_006350.1       | + | 3986317 | 3986359 | (shown above)                                                                                                                                                                   |
| Bps-5-23 | NC_007434.1       | + | 134501  | 134544  | <b>RNA</b> → <b>GcvP (COG0403)</b> <b>GcvP (COG1003)</b> →                           |
| Bps-5-15 | NC_007434.1       | + | 134551  | 134593  | (shown above)                                                                                                                                                                   |
| Bps-5-14 | NC_007434.1       | + | 134649  | 134691  | (shown above)                                                                                                                                                                   |
| Bps-5-1  | NC_007434.1       | + | 134894  | 134936  | (shown above)                                                                                                                                                                   |
| Bps-5-17 | NC_007434.1       | + | 134698  | 134740  | (shown above)                                                                                                                                                                   |
| Bps-5-18 | NC_007434.1       | + | 134747  | 134789  | (shown above)                                                                                                                                                                   |
| Bps-5-19 | NC_007434.1       | + | 134796  | 134838  | (shown above)                                                                                                                                                                   |
| Bps-5-16 | NC_007434.1       | + | 134600  | 134642  | (shown above)                                                                                                                                                                   |
| Bps-4-23 | NZ_AAHS02000026.1 | + | 58188   | 58231   | <b>RNA</b> → <b>GcvP (COG0403)</b> <b>GcvP (COG1003)</b> →              |
| Bps-4-15 | NZ_AAHS02000026.1 | + | 58238   | 58280   | (shown above)                                                                                                                                                                   |
| Bps-4-14 | NZ_AAHS02000026.1 | + | 58336   | 58378   | (shown above)                                                                                                                                                                   |
| Bps-4-3  | NZ_AAHS02000026.1 | + | 58581   | 58623   | (shown above)                                                                                                                                                                   |
| Bps-4-17 | NZ_AAHS02000026.1 | + | 58385   | 58427   | (shown above)                                                                                                                                                                   |
| Bps-4-18 | NZ_AAHS02000026.1 | + | 58434   | 58476   | (shown above)                                                                                                                                                                   |
| Bps-4-19 | NZ_AAHS02000026.1 | + | 58483   | 58525   | (shown above)                                                                                                                                                                   |
| Bps-4-16 | NZ_AAHS02000026.1 | + | 58287   | 58329   | (shown above)                                                                                                                                                                   |
| Bps-7-30 | NZ_AAHU01000007.1 | + | 112875  | 112918  | <b>RNA</b> → <b>GcvP (COG0403)</b> <b>GcvP (COG1003)</b> → |
| Bps-7-21 | NZ_AAHU01000007.1 | + | 112925  | 112967  | (shown above)                                                                                                                                                                   |
| Bps-7-20 | NZ_AAHU01000007.1 | + | 113023  | 113065  | (shown above)                                                                                                                                                                   |
| Bps-7-9  | NZ_AAHU01000007.1 | + | 113219  | 113261  | (shown above)                                                                                                                                                                   |
| Bps-7-5  | NZ_AAHU01000007.1 | + | 113268  | 113310  | (shown above)                                                                                                                                                                   |
| Bps-7-6  | NZ_AAHU01000007.1 | + | 113317  | 113359  | (shown above)                                                                                                                                                                   |

|           |                   |   |        |        |                                                                                                                                                                                                           |
|-----------|-------------------|---|--------|--------|-----------------------------------------------------------------------------------------------------------------------------------------------------------------------------------------------------------|
| Bps-7-23  | NZ_AAHU01000007.1 | + | 113072 | 113114 | (shown above)                                                                                                                                                                                             |
| Bps-7-24  | NZ_AAHU01000007.1 | + | 113121 | 113163 | (shown above)                                                                                                                                                                                             |
| Bps-7-25  | NZ_AAHU01000007.1 | + | 113170 | 113212 | (shown above)                                                                                                                                                                                             |
| Bps-7-22  | NZ_AAHU01000007.1 | + | 112974 | 113016 | (shown above)                                                                                                                                                                                             |
| Bps-9-32  | NZ_AAHV02000003.1 | + | 99586  | 99629  | <b>RNA</b> → <b>GcvP (COG0403)</b> <b>GcvP (COG1003)</b> →                                                     |
| Bps-9-22  | NZ_AAHV02000003.1 | + | 99636  | 99678  | (shown above)                                                                                                                                                                                             |
| Bps-9-21  | NZ_AAHV02000003.1 | + | 99734  | 99776  | (shown above)                                                                                                                                                                                             |
| Bps-9-2   | NZ_AAHV02000003.1 | + | 99979  | 100021 | (shown above)                                                                                                                                                                                             |
| Bps-9-24  | NZ_AAHV02000003.1 | + | 99783  | 99825  | (shown above)                                                                                                                                                                                             |
| Bps-9-25  | NZ_AAHV02000003.1 | + | 99832  | 99874  | (shown above)                                                                                                                                                                                             |
| Bps-9-26  | NZ_AAHV02000003.1 | + | 99881  | 99923  | (shown above)                                                                                                                                                                                             |
| Bps-9-23  | NZ_AAHV02000003.1 | + | 99685  | 99727  | (shown above)                                                                                                                                                                                             |
| Bps-10-29 | NZ_AAHW02000024.1 | - | 51066  | 51023  | <b>RNA</b> → <b>GcvP (COG0403)</b> <b>GcvP (COG1003)</b> →                                                     |
| Bps-10-18 | NZ_AAHW02000024.1 | - | 51016  | 50974  | (shown above)                                                                                                                                                                                             |
| Bps-10-17 | NZ_AAHW02000024.1 | - | 50967  | 50925  | (shown above)                                                                                                                                                                                             |
| Bps-10-5  | NZ_AAHW02000024.1 | - | 50722  | 50680  | (shown above)                                                                                                                                                                                             |
| Bps-10-2  | NZ_AAHW02000024.1 | - | 50673  | 50631  | (shown above)                                                                                                                                                                                             |
| Bps-10-19 | NZ_AAHW02000024.1 | - | 50918  | 50876  | (shown above)                                                                                                                                                                                             |
| Bps-10-20 | NZ_AAHW02000024.1 | - | 50820  | 50778  | (shown above)                                                                                                                                                                                             |
| Bps-10-21 | NZ_AAHW02000024.1 | - | 50771  | 50729  | (shown above)                                                                                                                                                                                             |
| Bps-1-35  | NZ_AAMA01000004.1 | + | 59606  | 59649  | <b>RNA</b> → <b>GcvP (COG0403)</b> <b>GcvP (COG1003)</b> → |
| Bps-1-26  | NZ_AAMA01000004.1 | + | 59656  | 59698  | (shown above)                                                                                                                                                                                             |
| Bps-1-25  | NZ_AAMA01000004.1 | + | 59705  | 59747  | (shown above)                                                                                                                                                                                             |
| Bps-1-24  | NZ_AAMA01000004.1 | + | 59754  | 59796  | (shown above)                                                                                                                                                                                             |
| Bps-1-9   | NZ_AAMA01000004.1 | + | 59999  | 60041  | (shown above)                                                                                                                                                                                             |
| Bps-1-1   | NZ_AAMA01000004.1 | + | 60195  | 60237  | (shown above)                                                                                                                                                                                             |
| Bps-1-10  | NZ_AAMA01000004.1 | + | 60146  | 60188  | (shown above)                                                                                                                                                                                             |
| Bps-1-30  | NZ_AAMA01000004.1 | + | 60048  | 60090  | (shown above)                                                                                                                                                                                             |
| Bps-1-31  | NZ_AAMA01000004.1 | + | 60097  | 60139  | (shown above)                                                                                                                                                                                             |
| Bps-1-27  | NZ_AAMA01000004.1 | + | 59803  | 59845  | (shown above)                                                                                                                                                                                             |
| Bps-1-28  | NZ_AAMA01000004.1 | + | 59901  | 59943  | (shown above)                                                                                                                                                                                             |
| Bps-1-29  | NZ_AAMA01000004.1 | + | 59950  | 59992  | (shown above)                                                                                                                                                                                             |
| Bps-2-31  | NZ_AAMB01000197.1 | - | 143960 | 143917 | <b>RNA</b> → <b>GcvP (COG0403)</b> <b>GcvP (COG1003)</b> → |
| Bps-2-22  | NZ_AAMB01000197.1 | - | 143910 | 143868 | (shown above)                                                                                                                                                                                             |
| Bps-2-21  | NZ_AAMB01000197.1 | - | 143861 | 143819 | (shown above)                                                                                                                                                                                             |
| Bps-2-20  | NZ_AAMB01000197.1 | - | 143812 | 143770 | (shown above)                                                                                                                                                                                             |
| Bps-2-7   | NZ_AAMB01000197.1 | - | 143567 | 143525 | (shown above)                                                                                                                                                                                             |
| Bps-2-4   | NZ_AAMB01000197.1 | - | 143371 | 143329 | (shown above)                                                                                                                                                                                             |
| Bps-2-8   | NZ_AAMB01000197.1 | - | 143420 | 143378 | (shown above)                                                                                                                                                                                             |
| Bps-2-26  | NZ_AAMB01000197.1 | - | 143518 | 143476 | (shown above)                                                                                                                                                                                             |
| Bps-2-27  | NZ_AAMB01000197.1 | - | 143469 | 143427 | (shown above)                                                                                                                                                                                             |
| Bps-2-23  | NZ_AAMB01000197.1 | - | 143763 | 143721 | (shown above)                                                                                                                                                                                             |

|                       |                    |   |         |         |                                                                                                                         |
|-----------------------|--------------------|---|---------|---------|-------------------------------------------------------------------------------------------------------------------------|
| Bps-2-24              | NZ_AAAMB01000197.1 | - | 143665  | 143623  | (shown above)                                                                                                           |
| Bps-2-25              | NZ_AAAMB01000197.1 | - | 143616  | 143574  | (shown above)                                                                                                           |
| Bps-6-32              | NZ_AAAMM02000015.1 | - | 99538   | 99495   | RNA → <b>GcvP (COG0403)</b> <b>GcvP (COG1003)</b> →                     |
| Bps-6-23              | NZ_AAAMM02000015.1 | - | 99488   | 99446   | (shown above)                                                                                                           |
| Bps-6-22              | NZ_AAAMM02000015.1 | - | 99439   | 99397   | (shown above)                                                                                                           |
| Bps-6-9               | NZ_AAAMM02000015.1 | - | 99194   | 99152   | (shown above)                                                                                                           |
| Bps-6-1               | NZ_AAAMM02000015.1 | - | 99145   | 99103   | (shown above)                                                                                                           |
| Bps-6-24              | NZ_AAAMM02000015.1 | - | 99390   | 99348   | (shown above)                                                                                                           |
| Bps-6-25              | NZ_AAAMM02000015.1 | - | 99292   | 99250   | (shown above)                                                                                                           |
| Bps-6-26              | NZ_AAAMM02000015.1 | - | 99243   | 99201   | (shown above)                                                                                                           |
| Bsp-1-31              | NC_007510.1        | - | 2043614 | 2043572 | RNA → <b>ExbD (COG0848)</b> → hypo →                                                                                    |
| Bam-1-14              | NZ_AAJL01000005.1  | + | 388286  | 388329  | RNA → <b>GCD (cd01151)</b> →                                                                                            |
| Bsp-1-32              | NC_007510.1        | - | 1666823 | 1666781 | RNA → <b>CaiC (COG0318)</b> → hypo →                                                                                    |
| Bam-1-15              | NZ_AAJL01000010.1  | - | 293775  | 293733  | RNA → RNA → <b>NarK (COG2223)</b> → <b>DHDPS-like (cd00408)</b> → <b>MviM (COG0673)</b> → <b>RbsB (COG1879)</b> →       |
|                       |                    |   |         |         | <b>MglA (COG1129)</b> →                                                                                                 |
| Bam-1-11              | NZ_AAJL01000010.1  | - | 293678  | 293636  | (shown above)                                                                                                           |
| Bdo-1-20              | NZ_AAKY01000015.1  | - | 11421   | 11379   | RNA → <b>ATP-synt_DE_N (pfam02823)</b> →                                                                                |
| Bdo-1-21              | NZ_AAKY01000068.1  | + | 11702   | 11742   | RNA → <b>UhpC (COG2271)</b> → <b>LdhA (COG1052)</b> →                                                                   |
| Bsp-1-33              | NC_007510.1        | - | 171796  | 171754  | RNA → <b>GcvP (COG0403)</b> <b>GcvP (COG1003)</b> →                                                                     |
| Bdo-1-22              | NZ_AAKY01000192.1  | - | 7943    | 7902    | RNA → RNA → RNA → <b>UhpC (COG2271)</b> → <b>DHDPS-like (cd00408)</b> → <b>MviM (COG0673)</b> → <b>RbsB (COG1879)</b> → |
|                       |                    |   |         |         | <b>MglA (COG1129)</b> → <b>MglA (COG1129)</b> →                                                                         |
| Bdo-1-17              | NZ_AAKY01000192.1  | - | 7846    | 7804    | (shown above)                                                                                                           |
| Bdo-1-18              | NZ_AAKY01000192.1  | - | 7748    | 7706    | (shown above)                                                                                                           |
| env-75                | AACY01118859.1     | - | 347368  | 347326  | RNA → RNA → RNA → RNA → unknown → unknown →                                                                             |
| env-50                | AACY01118859.1     | - | 347319  | 347277  | (shown above)                                                                                                           |
| env-35                | AACY01118859.1     | - | 347222  | 347180  | (shown above)                                                                                                           |
| env-68                | AACY01118859.1     | - | 347270  | 347229  | (shown above)                                                                                                           |
| <sup>2</sup> Bxe-1-35 | NC_007951.1        | - | 1872412 | 1872362 | RNA → <b>CaiC (COG0318)</b> →                                                                                           |
| Bxe-1-36              | NC_007951.1        | + | 1587813 | 1587854 | RNA → <b>AidB (cd01154)</b> → <b>CaiB (COG1804)</b> → <b>Sugar_tr (pfam00083)</b> →                                     |

**cd00156** Signal receiver domain; originally thought to be unique to bacteria (CheY, OmpR, NtrC, and PhoB), now recently identified in eukaryotes ETR1 Arabidopsis thaliana; this domain receives the signal from the sensor partner in a two-component systems; contains a phosphoacceptor site that is phosphorylated by histidine kinase homologs; usually found N-terminal to a DNA binding effector domain; forms homodimers

**cd00207** 2Fe-2S iron-sulfur cluster binding domain.

**cd00408** Dihydrodipicolinate synthase family.

**cd00567** Acyl-CoA dehydrogenase (ACAD).

**cd00667** Ring hydroxylating dioxygenase beta subunit. [2Fe-2S]

**cd00680** Ring hydroxylating alpha subunit (catalytic domain).

**cd00751** Thiolase are ubiquitous enzymes that catalyze the reversible thiolytic cleavage

of 3-ketoacyl-CoA into acyl-CoA and acetyl-CoA, a 2-step reaction involving a covalent intermediate formed with a catalytic cysteine.

**cd01151** Glutaryl-CoA dehydrogenase (GCD).

**cd01152** Putative acyl-CoA dehydrogenase (ACAD).

**cd01153** Putative acyl-CoA dehydrogenase (ACAD).

**cd01154** AidB.

**cd01158** Short chain acyl-CoA dehydrogenase (SCAD).

**cd01344** Pertactin-like passenger domains (virulence factors), C-terminal, subgroup 2, of autotransporter proteins of the type V secretion system of Gram-negative bacteria.

**cd01572** Quinolinate phosphoribosyl transferase (QAPRTase or QPRase), also called nicotinate-nucleotide pyrophosphorylase, is involved in the de novo synthesis of NAD in both prokaryotes and eukaryotes.

**cd03293** NrtD and SsuB are the ATP-binding subunits of the bacterial ABC-type



nitrate and sulfonate transport systems, respectively.

**cd03450** NodN (nodulation factor N) contains a single hot dog fold similar to those of the peroxisomal Hydratase-Dehydrogenase-Epimerase (HDE) protein, and the fatty acid synthase beta subunit.

**cd03454** YdeM is a *Bacillus subtilis* protein that belongs to a family of prokaryotic proteins of unknown function.

**cd03469** Rieske non-heme iron oxygenase (RO) family, N-terminal Rieske domain of the oxygenase alpha subunit; The RO family comprise a large class of aromatic ring-hydroxylating dioxygenases found predominantly in microorganisms. [2Fe-2S] cluster and a C-terminal catalytic domain with a mononuclear Fe(II) binding site. The Rieske [2Fe-2S]

**cd03528** Rieske non-heme iron oxygenase (RO) family, Rieske ferredoxin component; composed of the Rieske ferredoxin component of some three-component RO systems including biphenyl dioxygenase (BPDO) and carbazole 1,9a-dioxygenase (CARDO). [2Fe-2S]

**COG0009** Putative translation factor (SUA5) [Translation, ribosomal structure and biogenesis]

**COG0026** Phosphoribosylaminoimidazole carboxylase (NCAIR synthetase) [Nucleotide transport and metabolism]

**COG0041** Phosphoribosylcarboxyaminoimidazole (NCAIR) mutase [Nucleotide transport and metabolism]

**COG0148** Enolase [Carbohydrate transport and metabolism]

**COG0159** Tryptophan synthase alpha chain [Amino acid transport and metabolism]

**COG0224** F0F1-type ATP synthase, gamma subunit [Energy production and conversion]

**COG0277** FAD/FMN-containing dehydrogenases [Energy production and conversion]

**COG0318** Acyl-CoA synthetases (AMP-forming)/AMP-acid ligases II [Lipid metabolism / Secondary metabolites biosynthesis, transport, and catabolism]

**COG0333** Ribosomal protein L32 [Translation, ribosomal structure and biogenesis]

**COG0365** Acyl-coenzyme A synthetases/AMP-(fatty) acid ligases [Lipid metabolism]

**COG0372** Citrate synthase [Energy production and conversion]

**COG0403** Glycine cleavage system protein P (pyridoxal-binding), N-terminal domain [Amino acid transport and metabolism]

**COG0404** Glycine cleavage system T protein (aminomethyltransferase) [Amino acid transport and metabolism]

**COG0446** Uncharacterized NAD(FAD)-dependent dehydrogenases [General function prediction only]

**COG0511** Biotin carboxyl carrier protein [Lipid metabolism]

**COG0583** Transcriptional regulator [Transcription]

**COG0596** Predicted hydrolases or acyltransferases (alpha/beta hydrolase superfamily)

[General function prediction only]

**COG0600** ABC-type nitrate/sulfonate/bicarbonate transport system, permease component [Inorganic ion transport and metabolism]

**COG0627** Predicted esterase [General function prediction only]

**COG0642** Signal transduction histidine kinase [Signal transduction mechanisms]

**COG0665** Glycine/D-amino acid oxidases (deaminating) [Amino acid transport and metabolism]

**COG0673** Predicted dehydrogenases and related proteins [General function prediction only]

**COG0745** Response regulators consisting of a CheY-like receiver domain and a winged-helix DNA-binding domain [Signal transduction mechanisms / Transcription]

**COG0777** Acetyl-CoA carboxylase beta subunit [Lipid metabolism]

**COG0848** Biopolymer transport protein [Intracellular trafficking and secretion]

**COG1003** Glycine cleavage system protein P (pyridoxal-binding), C-terminal domain [Amino acid transport and metabolism]

**COG1022** NAD-dependent aldehyde dehydrogenases [Energy production and conversion]

**COG1024** Enoyl-CoA hydratase/carnitine racemase [Lipid metabolism]

**COG1048** Aconitase A [Energy production and conversion]

**COG1052** Lactate dehydrogenase and related dehydrogenases [Energy production and conversion / Coenzyme metabolism / General function prediction only]

**COG1062** Zn-dependent alcohol dehydrogenases, class III [Energy production and conversion]

**COG1129** ABC-type sugar transport system, ATPase component [Carbohydrate transport and metabolism]

**COG1172** Ribose/xylose/arabinose/galactoside ABC-type transport systems, permease components [Carbohydrate transport and metabolism]

**COG1254** Acylphosphatases [Energy production and conversion]

**COG1414** Transcriptional regulator [Transcription]

**COG1522** Transcriptional regulators [Transcription]

**COG1539** Dihydroneopterin aldolase [Coenzyme metabolism]

**COG1558** Flagellar basal body rod protein [Cell motility and secretion]

**COG1609** Transcriptional regulators [Transcription]

**COG1620** L-lactate permease [Energy production and conversion]

**COG1749** Flagellar hook protein FlgE [Cell motility and secretion]

**COG1804** Predicted acyl-CoA transferases/carnitine dehydratase [Energy production and conversion]

**COG1843** Flagellar hook capping protein [Cell motility and secretion]

**COG1879** ABC-type sugar transport system, periplasmic component [Carbohydrate transport and metabolism]

**COG2025** Electron transfer flavoprotein, alpha subunit [Energy production and con-

version]

**COG2080** Aerobic-type carbon monoxide dehydrogenase, small subunit CoxS/CutS homologs [Energy production and conversion]

**COG2084** 3-hydroxyisobutyrate dehydrogenase and related beta-hydroxyacid dehydrogenases [Lipid metabolism]

**COG2223** Nitrate/nitrite transporter [Inorganic ion transport and metabolism]

**COG2224** Isocitrate lyase [Energy production and conversion]

**COG2226** Methylase involved in ubiquinone/menaquinone biosynthesis [Coenzyme metabolism]

**COG2271** Sugar phosphate permease [Carbohydrate transport and metabolism]

**COG2303** Choline dehydrogenase and related flavoproteins [Amino acid transport and metabolism]

**COG2866** Predicted carboxypeptidase [Amino acid transport and metabolism]

**COG2897** Rhodanese-related sulfurtransferase [Inorganic ion transport and metabolism]

**COG3012** Uncharacterized protein conserved in bacteria [Function unknown]

**COG3232** 5-carboxymethyl-2-hydroxymuconate isomerase [Amino acid transport and metabolism]

**COG3284** Transcriptional activator of acetoin/glycerol metabolism [Secondary metabolites biosynthesis, transport, and catabolism / Transcription]

**COG3384** Uncharacterized conserved protein [Function unknown]

**COG3836** 2,4-dihydroxyhept-2-ene-1,7-dioic acid aldolase [Carbohydrate transport and metabolism]

**COG3971** 2-keto-4-pentenoate hydratase [Secondary metabolites biosynthesis, transport, and catabolism]

**COG4147** Predicted symporter [General function prediction only]

**COG4319** Ketosteroid isomerase homolog [Function unknown]

**COG4377** Predicted membrane protein [Function unknown]

**COG4583** Sarcosine oxidase gamma subunit [Amino acid transport and metabolism]

**COG4630** Xanthine dehydrogenase, iron-sulfur cluster and FAD-binding subunit A [Nucleotide transport and metabolism]

**COG4631** Xanthine dehydrogenase, molybdopterin-binding subunit B [Nucleotide transport and metabolism]

**COG4757** Predicted alpha/beta hydrolase [General function prediction only]

**COG4770** Acetyl/propionyl-CoA carboxylase, alpha subunit [Lipid metabolism]

**COG4786** Flagellar basal body rod protein [Cell motility and secretion]

**COG4787** Flagellar basal body rod protein [Cell motility and secretion]

**pfam00070** Pyridine nucleotide-disulphide oxidoreductase.

**pfam00083** Sugar (and other) transporter.

**pfam00106** short chain dehydrogenase.

**pfam00171** Aldehyde dehydrogenase family.

**pfam00496** Bacterial extracellular solute-binding proteins, family 5.

**pfam00926** 3,4-dihydroxy-2-butanone 4-phosphate synthase.

**pfam01315** Aldehyde oxidase and xanthine dehydrogenase, a/b hammerhead domain.

**pfam01425** Amidase.

**pfam01565** FAD binding domain.

**pfam01964** ThiC family.

**pfam02233** NAD(P) transhydrogenase beta subunit.

**pfam02445** Quinolinate synthetase A protein.

**pfam02682** Allophanate hydrolase subunit 1.

**pfam02738** Aldehyde oxidase and xanthine dehydrogenase, molybdopterin binding domain.

**pfam02823** ATP synthase, Delta/Epsilon chain, beta-sandwich domain.

**pfam02913** FAD linked oxidases, C-terminal domain.

**pfam03481** SUA5 domain.

**pfam03758** Senescence marker protein-30 (SMP-30).

**pfam03797** Autotransporter beta-domain.

**pfam03972** MmgE/PrpD family.

**pfam04267** Sarcosine oxidase, delta subunit family.

**pfam04303** Protein of unknown function (DUF453).

**pfam04341** Protein of unknown function, DUF485.

**pfam04362** Protein of unknown function (DUF495).

**pfam05146** Aha1 domain.

Duplicate sequences: the following putative homologs are not shown in the alignment because their sequences are identical to a homolog already shown: Bam-1-2, Bam-1-3, Bce-1-1, Bce-1-2, Bce-1-3, Bce-1-6, Bce-2-1, Bce-2-10, Bce-2-11, Bce-2-12, Bce-2-13, Bce-2-14, Bce-2-15, Bce-2-16, Bce-2-17, Bce-2-2, Bce-2-3, Bce-2-4, Bce-2-5, Bce-2-6, Bce-2-7, Bce-2-8, Bce-2-9, Bce-3-1, Bce-3-14, Bce-3-15, Bce-3-16, Bce-3-2, Bce-3-4, Bce-3-5, Bce-3-6, Bce-3-8, Bdo-1-1, Bdo-1-11, Bdo-1-18, Bdo-1-6, Bdo-1-8, Bdo-1-9, Bma-1-1, Bma-1-10, Bma-1-11, Bma-1-12, Bma-1-13, Bma-1-2, Bma-1-3, Bma-1-4, Bma-1-5, Bma-1-6, Bma-1-7, Bma-1-8, Bma-1-9, Bma-2-1, Bma-2-10, Bma-2-11, Bma-2-12, Bma-2-13, Bma-2-2, Bma-2-3, Bma-2-4, Bma-2-5, Bma-2-6, Bma-2-7, Bma-2-8, Bma-2-9, Bma-3-1, Bma-3-10, Bma-3-11, Bma-3-12, Bma-3-13, Bma-3-2, Bma-3-3, Bma-3-4, Bma-3-5, Bma-3-6, Bma-3-7, Bma-3-8, Bma-3-9, Bma-4-11, Bma-4-2, Bma-4-3, Bma-4-5, Bma-4-6, Bma-4-8, Bma-4-9, Bma-5-1, Bma-5-10, Bma-5-11, Bma-5-12, Bma-5-13, Bma-5-2, Bma-5-3, Bma-5-4, Bma-5-5, Bma-5-6, Bma-5-7, Bma-5-8, Bma-5-9, Bma-6-1, Bma-6-10, Bma-6-11, Bma-6-12, Bma-6-13, Bma-6-2, Bma-6-3,

Bma-6-4, Bma-6-5, Bma-6-6, Bma-6-7, Bma-6-8, Bma-6-9, Bma-7-1, Bma-7-10, Bma-7-11, Bma-7-12, Bma-7-13, Bma-7-2, Bma-7-3, Bma-7-4, Bma-7-5, Bma-7-6, Bma-7-7, Bma-7-8, Bma-7-9, Bma-8-1, Bma-8-10, Bma-8-11, Bma-8-12, Bma-8-13, Bma-8-14, Bma-8-15, Bma-8-16, Bma-8-2, Bma-8-3, Bma-8-4, Bma-8-5, Bma-8-6, Bma-8-7, Bma-8-8, Bma-8-9, Bma-9-1, Bma-9-10, Bma-9-11, Bma-9-12, Bma-9-13, Bma-9-2, Bma-9-3, Bma-9-4, Bma-9-5, Bma-9-6, Bma-9-7, Bma-9-8, Bma-9-9, Bps-1-1, Bps-1-10, Bps-1-11, Bps-1-12, Bps-1-13, Bps-1-14, Bps-1-16, Bps-1-17, Bps-1-18, Bps-1-19, Bps-1-2, Bps-1-20, Bps-1-21, Bps-1-23, Bps-1-24, Bps-1-25, Bps-1-26, Bps-1-27, Bps-1-28, Bps-1-29, Bps-1-3, Bps-1-30, Bps-1-31, Bps-1-32, Bps-1-33, Bps-1-34, Bps-1-35, Bps-1-4, Bps-1-5, Bps-1-6, Bps-1-7, Bps-1-8, Bps-1-9, Bps-10-1, Bps-10-10, Bps-10-11, Bps-10-12, Bps-10-14, Bps-10-16, Bps-10-17, Bps-10-18, Bps-10-19, Bps-10-2, Bps-10-20, Bps-10-21, Bps-10-22, Bps-10-24, Bps-10-25, Bps-10-26, Bps-10-27, Bps-10-28, Bps-10-29, Bps-10-3, Bps-10-5, Bps-10-6, Bps-10-7, Bps-10-8, Bps-10-9, Bps-2-1, Bps-2-10, Bps-2-11, Bps-2-12, Bps-2-13, Bps-2-14, Bps-2-15, Bps-2-16, Bps-2-17, Bps-2-18, Bps-2-19, Bps-2-2, Bps-2-20, Bps-2-21, Bps-2-22, Bps-2-23, Bps-2-24, Bps-2-25, Bps-2-26, Bps-2-27, Bps-2-28, Bps-2-29, Bps-2-3, Bps-2-30, Bps-2-31, Bps-2-4, Bps-2-5, Bps-2-6, Bps-2-7, Bps-2-8, Bps-2-9, Bps-3-1, Bps-3-11, Bps-3-13, Bps-3-19, Bps-3-2, Bps-3-20, Bps-3-21, Bps-3-24, Bps-3-25, Bps-3-26, Bps-3-3, Bps-3-5, Bps-3-6, Bps-3-8, Bps-3-9, Bps-4-1, Bps-4-10, Bps-4-11, Bps-4-12, Bps-4-13, Bps-4-14, Bps-4-15, Bps-4-16, Bps-4-17, Bps-4-18, Bps-4-19, Bps-4-2, Bps-4-20, Bps-4-21, Bps-4-22, Bps-4-23, Bps-4-3, Bps-4-4, Bps-4-5, Bps-4-6, Bps-4-7, Bps-4-8, Bps-4-9, Bps-5-1, Bps-5-11, Bps-5-12, Bps-5-17, Bps-5-18, Bps-5-19, Bps-5-2, Bps-5-21, Bps-5-23, Bps-5-3, Bps-5-4, Bps-5-5, Bps-5-6, Bps-5-7, Bps-5-8, Bps-5-9, Bps-6-1, Bps-6-10, Bps-6-11, Bps-6-12, Bps-6-13, Bps-6-14, Bps-6-15, Bps-6-16, Bps-6-17, Bps-6-19, Bps-6-2, Bps-6-21, Bps-6-22, Bps-6-23, Bps-6-24, Bps-6-25, Bps-6-26, Bps-6-27, Bps-6-28, Bps-6-29, Bps-6-3, Bps-6-30, Bps-6-31, Bps-6-32, Bps-6-4, Bps-6-5, Bps-6-6, Bps-6-9, Bps-7-1, Bps-7-10, Bps-7-11, Bps-7-12, Bps-7-13, Bps-7-15, Bps-7-16, Bps-7-17, Bps-7-18, Bps-7-19, Bps-7-2, Bps-7-20, Bps-7-21, Bps-7-22, Bps-7-23, Bps-7-24, Bps-7-25, Bps-7-27, Bps-7-28, Bps-7-3, Bps-7-30, Bps-7-4, Bps-7-5, Bps-7-6, Bps-7-8, Bps-7-9, Bps-8-1, Bps-8-10, Bps-8-11, Bps-8-2, Bps-8-3, Bps-8-4, Bps-9-1, Bps-9-10, Bps-9-11, Bps-9-13, Bps-9-16, Bps-9-17, Bps-9-18, Bps-9-2, Bps-9-21, Bps-9-22, Bps-9-23, Bps-9-24, Bps-9-25, Bps-9-26, Bps-9-27, Bps-9-28, Bps-9-29, Bps-9-3, Bps-9-30, Bps-9-31, Bps-9-32, Bps-9-4, Bps-9-5, Bps-9-6, Bps-9-7, Bps-9-8, Bps-9-9, Bsp-1-10, Bsp-1-14, Bsp-1-2, Bsp-1-7, Bth-1-1, Bth-1-17, Bth-1-18, Bth-1-19, Bth-1-3, Bth-1-4, Bth-1-6, Bxe-1-2, Bxe-1-3, Bxe-1-5, Bxe-1-7, Bxe-1-8, env-1, env-11, env-13, env-14, env-15, env-16, env-17, env-18, env-19, env-2, env-21, env-22, env-24, env-25, env-26, env-27, env-3, env-31, env-32, env-33, env-35, env-37, env-38, env-40, env-42, env-46, env-47, env-48, env-49, env-55, env-59, env-6, env-61, env-62, env-63, env-65, env-66, env-67, env-7, env-70, env-71, env-72

alignment positions 1...56

```

Bam-1-1 GC.AUGG.GACCC.GGGU.AAGUGCUGAA.....GCACUAACUCUGG.UCGAC
Bsp-1-1 GC.AUGG.GACCA.GAGU.AAGUGCUGAA.....GCACUAACUCUGG.UCGAC
Bma-4-1 GC.AUGG.GACCA.GAGU.AAGCGCUGAA.....GCGCCAACUCUGG.UCGAC
Bxe-1-1 GC.AUGG.GACCA.GAGU.AAGCGCUGAA.....GCGCUAACUCUGG.UCGAC
Bxe-1-4 GC.AUGG.GACCA.GAGU.AAGCGCUAAA.....GCGCUAACUCUGG.UCGAC
Bps-7-7 GC.AUGG.GACCA.GAGU.AAGUCUAAA.....GCGCUAACUCUGG.UCGAC
Bxe-1-6 GC.AUGG.GACCA.GAGU.AAGCGCUAAA.....GCGCCAACUCUGG.UCGAC
Bps-8-5 AC.AUGG.GACCA.GAGU.AAGCGCUAAA.....GCGCUAACUCUGG.UCGAC
Bxe-1-9 GC.AUGG.GACCA.GAGU.AAGCGCUAAA.....GCACUAACUCUGG.UCGAC
Bxe-1-10 GC.AUGG.GACCA.AAGU.AAGCGCUAAA.....GCGCUAACUCUGG.UCGAC
Bps-3-4 GC.AUGG.GACCA.GAGU.AAGCGCUAAA.....GCGCUAACUCUGG.UCGAC
Bma-4-4 GC.AUGG.GACCA.GCGU.AAGCGCUAAA.....GCGCUAACUCUGG.UCGAC
env-4 GC.AUGG.GACCA.GCGU.AAGCGCUAAA.....GCGCUAACUCUGG.UCGAC
Bps-8-6 GC.AUGG.GACCG.GAGU.AAGCGCUGAA.....GCGCUAACUCUGG.UCGAC
env-5 GC.AUGG.GACCA.GCAU.AAGCGCUAAA.....GCGCUAACUCUGG.UCGAC
Bps-6-7 GC.ACGG.GACCA.GAGU.AAGCGCUGAA.....GCGCUAACUCUGG.UCGAC

.....<<<<<. <<<<. <<<<<.....>>>>>.>>>>>>>.>>...
.....??22?. ????. ?221?. ?122?. ?????2?. ??...
GC-AUGG-GRY●-RRGY-REG●CYYRAA-----GC●CYRACY●●CR-YCGAC

```

Bps-6-8 GC .ACGG .GACCA .GAGU .AAGCGCUAAA . . . . . GCGCCAACUCUGG .UCGAC  
 Bps-10-4 GCCAUGG .GACCA .GAGU .AAGCGCUAAA . . . . . GCGCUAACUCUGG .UCGAC  
 Bps-3-7 GCCAUGG .GAUCA .GAGU .AAGCGCUAAA . . . . . GCGCUAACUCUGG .UCGAC  
 Bps-8-7 GC .AUGG .GACCG .GAGU .AAGCGCUAAA . . . . . GCGCUAACUCUGG .UCGAC  
 Bsp-1-3 GC .AUGG .GACCG .GAGU .AAGCGCUAAA . . . . . GCGCUAACUCUGG .UCGAC  
 Bps-8-8 GC .AUGG .GAUUG .GAGU .AAGCGCUGAA . . . . . GCGCUGACUCCGA .UCGAC  
 Bps-8-9 GC .AUGG .GAUUG .GAGU .AAGCGCUGAA . . . . . GCGCUAACUCCGA .UCGAC  
 Bth-1-2 GC .AUGG .GAUUG .GAGU .AAGCGCUAAA . . . . . GCGCUAACUCCGA .UCGAC  
 Bps-3-10 GC .AUGG .GAUUG .GAGU .AAGCGCUGAA . . . . . GCGUUGACUCCGA .UCGAC  
 Bps-9-12 GC .AUGG .GAUUG .GAGU .AAGUGCUGAA . . . . . GCGUUGACUCCGA .UCGAC  
 Bps-9-14 GC .AUGG .GAUUG .GAGU .AAGCGCUGAA . . . . . GCGCUGACUCCGA .UCGAC  
 Bth-1-5 GC .AUGG .GAUUG .GAGU .AAGCGCUAAG . . . . . GCGCUAACUCCGA .UCGAC  
 Bps-7-14 GC .AUGG .GAUUG .GAGU .GAGCGCUGAA . . . . . GCGCUGACUCCGA .UCGAC  
 Bth-1-7 GC .AUGG .GACCG .CAGU .AAGCGCUAAA . . . . . GCGCCAACUCGGG .UCGAC  
 Bxe-1-11 GC .AUGG .GACCG .CAGU .AAGCGCUAAA . . . . . GCGCUAACUCGGG .UCGAC  
 Bdo-1-2 GC .AUGG .GACCG .CAGU .AAGCGCUGAA . . . . . GCGCUAACUCGGG .UCGAC  
 env-8 GC .AUGG .GAUUG .GAGU .AAGCACUAAA . . . . . GCGCCAACUCCGA .UCGAC  
 env-9 GC .AUGG .GAUCA .GAUU .AAGCGCUAAA . . . . . GCGCUAACUCUGA .UCGAC  
 env-10 GC .AUGG .GAUCA .GAGU .AAGCGCUAAA . . . . . GCGCUAACUCUGA .UCGAC  
 Bdo-1-3 GC .AUGG .GACCG .GAGU .AAGCGCUGAA . . . . . GCACUAACUCGGG .UCGAC  
 Bdo-1-4 GC .AUGG .GACCG .GAGU .AAGUGCUGAA . . . . . GCACUAACUCGGG .UCGAC  
 Bdo-1-5 GU .AUGG .GACCG .GAGU .AAGUGCUGAA . . . . . GCACUAACUCGGG .UCGAC  
 Bce-3-3 GC .AUGG .GGCCC .GAGU .AAGCGCUGAA . . . . . GCGCCAACUCGGG .CCGAC  
 Bce-1-4 GC .AUGG .GACCG .GAGU .AAGCGCUGAA . . . . . GCGCCAACUCGGG .CCGAC  
 env-12 GC .AUGG .GACCG .GAGU .AAGCGCUGAA . . . . . GCGCUAACUCGGG .CCGAC  
 Bam-1-4 GC .AUGG .GACCG .GAGU .AAGCGCUGAA . . . . . GCGCUAACUCGGG .UCGAC  
 Bsp-1-4 GC .AUGG .GACCG .GAGU .AAGCGCUAAA . . . . . GCGCUAACUCGGG .UCGAC  
 Bsp-1-5 GC .AUGG .GACAG .CAGU .AAGCGCUGAA . . . . . GCGCUAACUCUGG .UCGAC  
 Bce-1-5 GC .AUGG .GACCG .AAGU .AAGCGCUAAA . . . . . GCGCUAACUCUGG .UCGAC  
 Bsp-1-6 GC .AUGG .GACCG .AAGU .AAGCGCUGAA . . . . . GCGCUAACUCUGG .UCGAC  
 Bce-3-7 GC .AUGG .GACCG .AAGU .AAGCGCUAAA . . . . . GCGCUAACUCUGG .UCGAC  
 Bce-1-7 GC .AUGG .GACCG .AAGU .AAGCGCUAAA . . . . . GCGCUAACUCUGG .UCGAC  
 6 env-20 GC .AUGG .GACCG .AAGU .AAGCGCUGAA . . . . . GCGCUAACUCUGA .UCGAC  
 Bvi-1-1 GC .AUGG .GACCG .ACGU .AAGCGCUAAA . . . . . GCGCUAACUCUGG .UCGAC  
 env-23 GC .AUGG .GACCG .ACGU .AAGCGCUAAA . . . . . GCGCUAACUCUGG .UCGAC  
 Bdo-1-7 GC .AUGG .GACCG .AAGU .AAGCGCUGAA . . . . . GCGCUAACUCGGG .UCGAC  
 Bps-9-15 GC .AUGG .GACCA .GAGU .AAGUGCUCAA . . . . . GCGCCAACUCGGG .UCGAC  
 Bps-8-12 GC .AUGG .GACCA .GAGU .AAGUGCUCAA . . . . . GCGCCAACUCUGG .UCGAC  
 Bam-1-5 GC .AUGG .AACCA .GAGC .AAGCGCUAAA . . . . . GCGCCAACUCUGG .UCGAC  
 Bth-1-8 GC .AUGG .GACCA .GAGU .CAGCGCUGAG . . . . . GCGCCAACUCUGG .UCGAC  
 Bps-1-15 GC .AUGG .GACCA .GAGU .AAGYCUAAA . . . . . GCGCCAACUCUGG .UCGAC  
 Bxe-1-12 GC .AUGG .GACCG .CGGU .AAGCGCGAAA . . . . . GCGCUAACUCGGG .UCGAC  
 Bps-8-13 GCCAUGG .GAUCA .GAGU .AAGCGCUGAA . . . . . GCGCUAACUCUGG .UCGAC  
 Bam-1-6 GC .AUGG .GGCCA .GAGU .AAGCGCUAAA . . . . . GCGCCAACUCUGG .CCGAC  
 Bsp-1-8 GC .AUGG .GAUCC .AAGU .AAGCGCUAAA . . . . . GCGCUAACUCUGA .UCGAC  
 Bsp-1-9 GC .AUGG .GACCG .AAGU .AAGCGCUAAA . . . . . GCGCUAACUCUGA .UCGAC  
 Bdo-1-10 GC .AUGG .GGCCC .GAGU .AAGCGCUAAA . . . . . GCGCUAACUCGGG .CCGAC  
 Bxe-1-13 GC .AUGG .GACCA .GAGU .AAGCGCUGAA . . . . . GCGCCAACUCUGA .UCGAC  
 env-28 GC .AUGG .GACGA .GAGU .AAGCGCUAAA . . . . . GCGCUAACUCUGG .UCGAC  
 Bps-8-14 GC .AUGG .GAUUG .GGGU .AAGCGCUGAA . . . . . GCGCUAACUCUGA .UCGAC  
 env-29 GC .AUGG .GACCG .GAUU .AAGCGCUAAA . . . . . GCGCCAACUCGGG .UCGAC  
  
 . . . . . <<<<< .<<<< .<<<<< . . . . . >>>>> .>>>>>> .>> . .  
 . . . . . ???22? .???2? .?221? . . . . . ?122? .????22? .?? . .  
 GC-AUGG-GRY●-RRGY-RFG●GCYRAA-----GC●CYRACY●●CR-YCGAC

Bps-5-10 GC . AUGG . GAUCG . GGGC . AAGCGCUGAA . . . . . GCGCUAACUCCGA . UCGAC  
 Bxe-1-14 GC . AUGG . GAUCG . GAGU . AACCGCUAAA . . . . . GCGGUAAACUCCGG . UCGAC  
 Bxe-1-15 GC . AUGG . GAUCG . GAGU . AACCGCUAAA . . . . . GCGGUAAACUCCGA . UCGAC  
 Bxe-1-16 GC . AUGG . GAUCG . GAGU . AACCGCUAAA . . . . . GCGGUAAACUCCGA . UCGAC  
 env-30 GC . AUGG . GACCG . GAGU . AAGCGCUGAA . . . . . GCGCAACCCCGG . UCGAC  
 env-34 GC . AUGG . GACCG . GAGU . AAGUGCUGAA . . . . . GCGCAACUCUGG . UCGAC  
 Bps-3-12 GC . AUGG . GAUCG . GAGU . CAGCGCUGMA . . . . . GCGCUGACUCCGA . UCGAC  
 Bdo-1-12 GC . AUGG . GGCGG . GAGU . AAGCGCUAAA . . . . . GCGCUAACUCCGG . CCGAC  
 Bth-1-9 GC . AUGG . GGCGG . GAGU . AAGCGCUAAA . . . . . GCGCUAACUCCGG . CCGAC  
 Bdo-1-13 AC . AUGG . GGCGG . GAGU . AAGCGCUGAA . . . . . GCGCUAACUCCGG . CCGAC  
 env-36 GC . AUGG . GGCGG . GACU . AAGCGCUAAA . . . . . GCGCUAAGUCCGG . CCGAC  
 env-39 GC . AUGG . GGCGG . GACU . AAGCGCUGAA . . . . . GCGCAAGUCCGG . CCGAC  
 Bsp-1-11 GC . AUGG . GGCUG . GAGU . AAGCGCUAAA . . . . . GCGCUAACUCCAG . CCGAC  
 env-41 GC . AUGG . GGUUG . GAGU . AAGCGCUAAA . . . . . GCGCUAACUCCAA . CCGAC  
 Bce-1-8 GC . AUGG . GGCGG . GAGU . AAGUGCUAAA . . . . . GCACUCACUCCGG . CCGAC  
 Bps-10-13 GC . AUGA . GGCGG . GAGU . AAGUGCUAAA . . . . . GCGCAACUCCGG . UCGAG  
 Bps-8-15 GC . AUGG . GGCGG . GAGU . AAGUGCUAAA . . . . . GCGCAACUCCGG . UCGAG  
 Bps-3-14 GC . GUGG . GGCGG . GAGU . AAGUGCUAAA . . . . . GCGCAACUCCGG . UCGAG  
 Bps-9-19 GC . GUGG . GGCGG . GAGU . AAGUGCUAAA . . . . . GCGCAACUCCGG . UCGAG  
 Bps-6-18 GC . GUGG . GGCGG . GAGU . AAGUGCUAAA . . . . . GCGCAACUCCGG . GCGAG  
 Bps-3-15 GC . AUGG . GAUCG . GGGC . AAGCGCGAA . . . . . GCGCGACUCCGA . UCGAC  
 Bps-8-16 GC . AUGG . GAUCG . GGGC . AAGCGCGAA . . . . . GCGCGACUCCGA . UCGAC  
 Bps-10-15 GC . AUGG . GAUCG . GGGC . AAGCGCGAA . . . . . GCGCGACUCCGA . UCGAC  
 Bps-9-20 GC . AGGG . GAUCG . GGGC . AAGCGCGAA . . . . . GCGCGACUCCGA . UCGAC  
 Bps-1-22 GC . AUGG . GAUCG . GGGC . AAGCGCGAA . . . . . GCGCGACUCCGA . UCGGC  
 Bps-5-13 GC . AUGG . GAUCG . GGGU . AAGCGCUGAA . . . . . GCGCGACUCCGA . UCGAC  
 Bps-6-20 GC . AUGG . GAUCG . GGGC . AAGCGCGAA . . . . . GCGCUAACUCCGA . UCGGC  
 Bps-3-16 GC . AGGG . GAUCG . GGGC . AAGCGCGAA . . . . . GCGCUAACUCCGA . UCGAC  
 Bps-5-14 GC . AUGG . GAUCG . GGGU . ACGCGCUGAA . . . . . GCGCAACUCCGG . UCGAC  
 Bma-4-7 GC . AUGG . GAUCG . GGGU . ACGCGCUGAA . . . . . GCGCAACUCCGG . UCGAU  
 Bps-8-17 AC . AUGG . GAUCG . GGGU . ACGCGCUGAA . . . . . GCGCAACUCCGG . UCGAC  
 Bps-3-17 AC . AUGG . GAUCG . GGGU . ACGCGCUGAA . . . . . GCGCAACUCCGG . UCGAU  
 Bps-3-18 AC . AUGG . GAUCG . GGGU . ACGCGCUGAA . . . . . GCGCAACUCCGG . UCGAU  
 Bps-5-15 GC . AUGG . GAUCG . GGGU . ACGCGCUGAA . . . . . GCGCAGCUCCGG . UCGAC  
 Bps-5-16 GC . AUGG . GAUCG . GGGU . ACGCGCUGAA . . . . . GCGCAGCUCCGG . UCGAU  
 Bps-8-18 GC . AUGG . GACCG . GGGU . ACGCGCUGAA . . . . . GCGCAGCUCCGG . UCGAU  
 Bps-8-19 GC . AUGG . GACCG . GAGU . AAGCGCUGAA . . . . . GCGCAGCUCCGG . UCGAC  
 Bps-8-20 GC . AUGG . GACCG . GGGU . AAGCGCUGAA . . . . . GCGCAGCUCCGG . UCGAC  
 Bps-8-21 GC . AUGG . GACCG . GGGU . AAGCGCUGAA . . . . . GCGCAGCUCUGG . UCGAC  
 env-43 GC . AUAG . GACCA . GAGU . AAGCGCAAA . . . . . GCGCUAACUCUGA . UCGAC  
 Bce-1-9 GC . AUGG . GACCA . GAAC . AACCGCUAAA . . . . . GCGCAACUCCGG . UCGAC  
 env-44 AC . AUGG . GACCG . GCGU . AAGCGCUAAA . . . . . GCGCUAACGCCGG . UCGAC  
 Bxe-1-17 GC . AUGG . GACCU . GAGC . AAGCGCUAAA . . . . . GCGCAGCUCCGG . UCGAC  
 Bps-3-22 GC . AUGG . GGCGG . GAGU . AAGCGCUAAA . . . . . GCGCAACUCCGG . UCGAC  
 env-45 GC . AUGG . GACCG . ACGU . AAGCGCUGAA . . . . . GCGCUGACGUGGA . UCGAC  
 env-50 GC . AUGG . AGCGG . GAGU . AAGCGCUGAA . . . . . GCGCCGACUCCGG . UCGAC  
 Bxe-1-18 GC . AUGG . GACUG . GAAU . AAGCGCUAAA . . . . . GCGCUAACUCCAG . UCGAC  
 Bam-1-7 GC . AUGG . GACAG . GAGU . AAGCGCUAAA . . . . . GCGCUAACUCCUA . UCGAC  
 Bce-1-10 GC . AUGG . GGCGG . GAGU . AAGUGCUGAA . . . . . GCACUCACUCCGG . CCGAC  
 Bsp-1-12 GC . AUGG . GGUUG . GAGU . AAGUGCUGAA . . . . . GCACUCACUCCGG . CCGAC  
 Bam-1-8 CC . AUGG . GGCCAUGAGU . AAGCGCUAAA . . . . . GCGCAACUCCGG . UCGAC  
  
 . . . . . <<<<<< . <<<<< . <<<<<< . . . . . >>>>>> . >>>>>>>> . >> . .  
 . . . . . ???2? . ???? . ?221? . . . . . ?122? . ???2? . ?? . .  
 GC-AUGG-GRY●-RRGY-RFG-CYRA-----GC-CYRACY●-CR-YCGAC

Bdo-1-14 GC . AUGG . **GACCG . GAGU** AAGCGCUAAA . . . . . **GCGCCAACUC**CGG . UCGAC  
 Bdo-1-15 GC . AUGG . **GAUCG . GAGU** AAGCGCUAAA . . . . . **GCGCCAACUC**CGG . UCGAC  
 Bth-1-10 GC . AUCC . **GACCA . GAGC . AAGCGC**UAAA . . . . . **GCGCUAACUC**CGG . UCGAC  
 Bce-1-11 GC . AUGG . **GACCC . CAGU . AAGCGC**UAAA . . . . . **GCGCUAACUGGG**AUCGAC  
 Bce-3-9 GC . AUGG . **GAUCU . GAGU . AAGCAC**UAAA . . . . . **GCGCUAACUC**AGA . UCGAC  
 Bce-3-10 GC . AUGG . **GAUCU . GAGC . AAGCGC**UAAA . . . . . **GCGCUAACUC**AGA . UCGAC  
 Bsp-1-13 GC . AUGG . **GGCCC . AAGC . AAGCGC**UAAA . . . . . **GCGCUAACUC**CGG . UCGAC  
 Bps-7-26 GCCAUGG . **GAUCA . GAGU . AAGCGC**UGAA . . . . . **GCGCCAACUC**UGG . UUGAC  
 env-51 GC . AUGG . **GACCC . GAGC . AAGCGC**UGAA . . . . . **GUGCUGACUC**CGG . UCGAC  
 env-52 GC . AUGG . **GACCC . GAGC . AAGCGC**UGAA . . . . . **GUGCUGACUC**CGG . CCGAC  
 Bsp-1-15 GC . AUGG . **GACGA . GAGU . AAGUGC**UGAA . . . . . **GCACUAAACUC**CG . CCGAC  
 Bxe-1-19 GC . AUGG . **GACCG . GAGU . CAGCGC**UGAA . . . . . **GCGCUAACUC**CGG . CCGAC  
 Bxe-1-20 GC . ACGG . **GACCG . GAGU . AGGCGC**UGAA . . . . . **GCGCUAACUC**CGG . CCGAC  
 Bxe-1-21 GC . AUGG . **GACCG . GAGU . AAGCGC**UGAA . . . . . **GCGCCAACUC**UGG . UCGAC  
 Bps-3-23 GC . AUGG . **GAUCG . GGGC . AAGCGC**UGAA . . . . . **GCGCUAACUC**CGG . UCGAC  
 env-53 GC . GUGG . **GAUCU . GAGC . AAGCGC**UGAA . . . . . **GUGCUGACUC**CGG . UUGAC  
 env-54 GC . GUGG . **GCUCU . GAGC . AAGCGC**UGAA . . . . . **GUGCUGACUC**CGG . UCGAC  
 Bsp-1-16 GC . AUGG . **GGUCC . CAGU . AAGCGC**UAAA . . . . . **GCGCUAACUGGG**A . CCGAC  
 env-56 GC . AUGG . **GACCA . GAGC . AAGUGC**UGAA . . . . . **GCACUAAACUC**UGG . UCACA  
 Bvi-1-2 GC . AUGG . **GAUCG . GAGU**UGAGCGCUGAA . . . . . **GCGCCCGUC**CGG . UCGAC  
 Bam-1-9 GC . AUGG . **GACGG . GAGU . AAGCGC**UAAA . . . . . **GCGCCAACUC**CGG . UCGCG  
 Bth-1-11 GC . AUGG . **GAUCG . GGGU . AGGCGC**UGAA . . . . . **GCGCCAACG**CGG . UCGAC  
 Bth-1-12 GC . AUGG . **GAUCG . GGA . AGGCGC**UGAA . . . . . **GCGCCAACG**CGG . UCGAC  
 Bam-1-10 GC . AUGG . **GAUCA . GAGC . AAGCGC**UAAA . . . . . **GCGCCAACUC**UGG . CCGAC  
 env-57 GC . AUGG . **GACAU . CAGU . AAGCGC**UAAA . . . . . **GCGCUAACUGGG**A . CCGAC  
 Bsp-1-17 GC . AUGG . **GACCG . GAGU . CAGCGC**UGAA . . . . . **GCGCCACUC**CGG . UCGAC  
 env-58 GC . AUGG . **GACGA . CAGU . AAGUGC**UAAA . . . . . **GCACUAAACUC**UGG . UCGAC  
 env-60 GC . AUGG . **GGCUC . GGGU . GGGCGC**UGAA . . . . . **GCGCCAACUC**CGG . CCGAC  
 env-64 GC . AUGG . **GGCUC . GGGU . GAGCGC**UGAA . . . . . **GCGCCAACUC**CGG . UCGAC  
 Bce-1-12 GC . AUGG . **GACUC . AGGU . AACCGC**UAAA . . . . . **GCGCUAACUC**UGG . UCGAC  
 env-68 GC . AUGG . **GAUCC . AGGU . AAGCGC**UAAA . . . . . **GCG . UAACUUGG**A . UCGAC  
 Bxe-1-22 GC . AUGG . **GGCG . GAGU . GAGCGC**UGAA . . . . . **GCGCUAACUC**CGG . UCGAC  
 Bsp-1-18 GC . AUGG . **GGCG . CACC . AGGCGC**UGAA . . . . . **GCGCCACUC**CGG . CCGAC  
 Bxe-1-23 GC . AUGG . **GGUG . GAGU . AAGCGC**UAAA . . . . . **GCACCAACUC**CGG . CCGAC  
 Bxe-1-24 GC . AUGG . **AGUC . GAGU . AGGCGC**UAAA . . . . . **GCACCAACUC**CGG . CCGAC  
 Bps-10-23 AC . AUGG . **GACCA . GAGC . AGGUCC**UGAA . . . . . **GCGCUAACUC**UGG . UCGAC  
 Bce-3-11 GC . AUGG . **GAUCC . AGGU . AACCGC**UAAA . . . . . **GCGCCAACCG**G . UCGAC  
 Bps-8-22 GC . AUGG . **GAUCG . GAGU . GAGCGC**UGAA . . . . . **GCGUUCGCU**UGG . UCGAC  
 Bps-5-20 GC . AUGG . **GAUCG . GGGU . GAGCGC**UGAA . . . . . **GCGUUCGCU**UGG . UCGAC  
 Bce-3-12 GC . AUGA . **GACUG . GUGU . AAGCGC**AAA . . . . . **GCGCUAACUC**CGG . UCGAC  
 Bsp-1-19 GC . AUGG . **GACCC . GAGU . AAGCGC**UGAA . . . . . **GUGCCACUC**CGG . CCGGC  
 Bam-1-11 GC . AUGG . **GGCCC . CCGU . AAGCGC**UGAA . . . . . **GCGCCAACG**UGG . CCGAC  
 Bvi-1-3 GC . AUGG . **GGUCC . ACGU . AGGCGC**UGAA . . . . . **GCGCCAACG**UGG . CCGAC  
 Bce-1-13 GC . AUGG . **GGCG . GAGU . ACGCGC**UGAA . . . . . **GCGC . UACUCGG**GCGAC  
 Bsp-1-20 GC . AUGG . **GGCG . GAGC . ACGCGC**GAA . . . . . **GCGCCACUC**CGG . UCGAC  
 Bxe-1-25 GC . AUGC . **GACCG . GAGU . AACCGC**UAAA . . . . . **GCGCUGACUC**CGG . AUCCG  
 Bxe-1-26 UU . ACGG . **GACCG . GAGG . AAGUGC**UGAA . . . . . **GCACUCACUC**CGC . UCGAC  
 Bsp-1-21 GC . AUGG . **GACCG . CCCU . AAGCGC**UGAA . . . . . **GCGCCAAGGG**CGG . UCGAC  
 Bsp-1-22 GC . AUGG . **GACCU . CCCU . AAGCGC**UAAA . . . . . **GCGCCAAGGG**CGG . UCGAC  
 env-69 GC . AUGG . **GGCCU . GGGG . GAGCGC**UGAA . . . . . **GCGCCAACUC**CGG . CCGAC  
 Bsp-1-23 GC . AUGG . **GGUCA . GCGU . AAGCGC**UGAA . . . . . **GCGCUAACG**CUGA . CCGAC  
  
 . . . . . <<<<< . <<<< . <<<<< . . . . . >>>>> . >>>>>>> . >> . .  
 . . . . . ???? . ??? . ?221? . . . . . ?122? . ?????? . ? . .  
 GC-AUGG-GRY●-RRGY-RFG●GCYRAA-----GC●CYRACY●●CR-YCGAC

Bdo-1-16 GC . AUGG . **GACUG . GAGC . AAGCGC**UGAA . . . . . **GCGGUGACUCCGG . UCGAC**  
 Bxe-1-27 GC . AUGG . **GACCG . GAGUA**AUGCGCCAAA . . . . . **GCGCGAACUCCGG . CCAAC**  
 Bth-1-13 GC . AUGG . **GAUUG . GAGU . CAACGC**CGAA . . . . . **GCGCCAGCUCCGA . UCGAC**  
 Bsp-1-24 GC . AUGG . **GACAG . GAGC . AAGCGC**UGAA . . . . . **GCGCCAACUCCGG . UAGAC**  
 Bdo-1-17 GC . AUGG . **GGUAG . CCGU . AAGCGC**UAAA . . . . . **GCGCUAACGCCUA . CCGAC**  
 Bth-1-14 GC . AUGG . **AACCA . GAGC . AUGCGC**CAA . . . . . **GCGCUAACUCCGG . UCGAC**  
 Bth-1-15 GC . AUGG . **GACCC . GGGC . GAGCGC**CAAA . . . . . **GCGCCAACUCCGG . UCGAC**  
 Bxe-1-28 GC . AUGG . **GACCG . AGGU . AAGCGC**CGAC . . . . . **GCGCUUACUCUGG . CCGAC**  
 Bsp-1-25 GC . AUGG . **GAUCC . ACGU . AAGCGC**CAAG . . . . . **GCGCUACCCCGG . UCGAC**  
 Bxe-1-29 GC . AUGG . **GAUUG . CAGC . AAGCGU**CAGA . . . . . **GCGCCAACUCGGA . UCGAC**  
 Bce-3-13 GC . AUGG . **CGCCC . GGGC . AAGCGC**UGAA . . . . . **GCGCUACUCUGG . UCGAC**  
 Bxe-1-30 GC . AUGG . **GACCC . GAGU . UACCGC**GAAA . . . . . **GCGGUAAACCCGG . CCGAC**  
 env-73 GG . AUGG . **GAUUG . GAGU . GGGCGC**UAAC . . . . . **GCGCCAACUCGGA . UCGAC**  
 Bvi-1-4 GU . GUGG . **AGUUC . ACGU . AGGCGC**UGAA . . . . . **GCGCCAGGUGGG . CCGAC**  
 env-74 GC . AUGG . **GAUUG . GCGC . AGGCGC**GCAA . . . . . **GUGCCCGUCGGA . UCGAC**  
 Bam-1-12 GC . AUGG . **GAUUG . GAGU . CAGCGC**GCAA . . . . . **GUGUCGCGUCGGA . UCGAC**  
 Bsp-1-26 GG . AGGGGGGGC . **GAGU . AAGCGC**UGAA . . . . . **GCGCUAACUCGGA . CCGAC**  
 Bsp-1-27 AC . AUGG . **GGCCC . GGGU . GAGCGC**UGAA . . . . . **GUGUCGACUCGCG . UCGAU**  
 Bsp-1-28 GC . AUGG . **GAUCC . AGGC . AAGC**ACAAA . . . . . **CCGCCAACUCGGA . UCGAC**  
 Bce-1-14 GC . AUGG . **GACUG . GCGU . GAGAGC**CAAA . . . . . **GCGCCAACGCGCG . UCGAC**  
 Bxe-1-31 GG . AUGG . **GAGCG . GAGU . UGGCGC**UAAA . . . . . **GCGCUGACUCUGG . UCGAC**  
 Bdo-1-19 GC . AUGG . **GAUUG . GAGC . GGGCGC**UGAA . . . . . **GCGGGAACUCGGA . UCGAU**  
 Bce-1-15 GC . AU . . . **GACCC . GAGU . CAGUGC**CAAA . . . . . **GCACUCACUCGCG . UCGAC**  
 Bps-8-23 GC . AUGG . **GAUUG . GGGU . CGGCGC**UGAA . . . . . **AUGCCGACUCGCG . UCGAC**  
 Bma-4-10 GC . AUGG . **GAUUG . GGGG . CGGCGC**UGAA . . . . . **AUGCCGACCCCGG . UCGAC**  
 Bps-5-22 . . . . CGG . **GGCCA . GAGU**AAAGCGCUGAA . . . . . **GCGCUGACUCUGG . CCAAC**  
 Bps-8-24 . . . . CGG . **GGCCA . GAGU**AAAGCGCUGAA . . . . . **GCGCUGACUCUGG . CCGAC**  
 Bxe-1-32 GC . AUGG . **GACCG . GAGC . CGGCGC**UGAG . . . . . **GCGCUGACCCCGG . UCUAC**  
 Bxe-1-33 GC . ACGG . **GACCA . GAGC . AGGCGC**CGAA . . . . . **GCGCCAACUCGGA . UCGAC**  
 Bce-1-16 GC . ACGG . **GCUCG . GGGC . CGGCGC**CGAA . . . . . **GCGCCCGUCGGA . CCGAC**  
 Bma-4-12 CC . GCGG . **GACCG . GAGU**AAAGCGCUGAA . . . . . **GCGCUGACUCUGG . CUAAC**  
 Bth-1-16 GU . AUCC . **GAUCA . UCGU . AAGCGC**UCAA . . . . . **GCGCUAACGAUGA . UCGAG**  
 Bsp-1-29 GC . AUGG . **GGUUC . AGGU . GAGUGC**UAAA . . . . . **ACACUGACUCGGA . UCGAC**  
 Bxe-1-34 GC . CUGG . **GACCG . GAGU**GACGGCUCAA . . . . . **GCGGGAACUCUGG . CCGGU**  
 Bsp-1-30 . . . . UGG . **GGGUG . GAGU . AAGCGC**UGAA . . . . . **GCGCUAACUCGAG . CCAUC**  
 Bth-1-20 GC . AUGG . **GACCG . GAAU . CGGCGC**CGAG . . . . . **GCGCCGAUCGCG . UCCAC**  
 Bam-1-13 GC . AUAG . **GGCCC . AAGU . GCGCGC**UGAA . . . . . **GUGCCAGCUGGG . ACGAC**  
 Bce-1-17 GC . ACGG . **GGCCG . GAUC . GCGCGC**UGAA . . . . . **GCGCCGGGAUCGG . CCGAC**  
 Bps-7-29 GC . AUGG . **GGCCG . GGGG . A . GCGU**UGAA . . . . . **GCGUGAACUCGCG . ACGAG**  
 Bth-1-21 GU . AUCC . **GACUA . UGGC**CAGGGCUGAG . . . . . **GUACCGACUCUGG . UCGAC**  
 Bma-4-13 GC . AUCC . **GACGA . UGGCA**AGCGCUGAA . . . . . **GCGCCAAUUCGCG . UCGAC**  
 Bps-8-25 GC . AUCC . **GACGA . UGGCA**AGCGCUGAA . . . . . **GCGCCAAUUCGCG . UCGAU**  
 Bsp-1-31 CG . GUGG . **GAUUG . GCGU . AAGUGC**UCAG . . . . . **GCACUAACGCAGG . UCGAC**  
 Bam-1-14 GC . AUGG . **AAUCA . GGCA . AAGCGC**UGGA . . . . . **UCCGCGACUCUGA . CCGAC**  
 Bsp-1-32 GC . ACGG . **GGCAC . GGGC . CGGCGC**AGAA . . . . . **GCGCCCGCCUCG . CCGAG**  
 Bam-1-15 GC . AUGG . **GGCCU . CCGC . AAGCGC**CAAG . . . . . **ACGCAGACGGAGG . CCGAC**  
 Bdo-1-20 GG . CAUG . **GAUUG . GAGU . CGGCGC**CGAC . . . . . **GCGCUCGUCGCG . UCGAC**  
 Bdo-1-21 GG . ACGG . **GACCG . GAG . . . CGGCGC**GAAC . . . . . **GCGCGACGCGCGG . UCGAC**  
 Bsp-1-33 GC . AUGC . **GGCCC . GAGC . CGGUGC**CGAA . . . . . **GCACCCUCGCGG . CCGAC**  
 Bdo-1-22 GC . AUGGGCGGCU . . . **GU . AAGCGC**UAG . . . . . **GCGCUAACGUGGA . CCGAU**  
 env-75 GU . ACGG . **GGCCG . GGAC . GGGCGC**UGAA . . . . . **GCGUUUUGUCGCG . UCGAU**  
  
 . . . . . <<<<< . <<<< . <<<<< . . . . . >>>>> . >>>>>>> . >> . .  
 . . . . . ???2? . ???? . ?221? . . . . . ?122? . ???2? . ?? . .  
 GC-A|GG-GRY●-RRGY-RFG|GCYRA|-----GC|CYRACY●CR-YCGAC

```

2Bxe-1-35   GC.AUGG.GACCG.GGAC.GAGCGCCACAGCACACAGCGCGGGCUCCGG.UCGAC
Bxe-1-36   GC.AGGG.ACCAG.AGUA.AUGCGCCAAA.....GCGCGA.ACUCUG.GCGAU
           .....<<<<<. <<<<<. <<<<<.....>>>>>. >>>>>>>. >>>...
           .....? ? ? ? ? . ? ? ? ? . ? 2 2 1 ? ..... ? 1 2 2 ? . ? ? ? ? ? 2 ? . ? ? ...
GC-AUGG-GRYC•-RRGY-RFG•GCYRA-----GC•CYRACY•GR-YCGAC

```

## 2.9 The mini-*ykkC* motif

### 2.9.1 Gene families associated with the *ykkC* motif.

The following conserved domains are found downstream of both the *ykkC* motif [1] and our new mini-*ykkC* motif:

- COG0511 Biotin carboxyl carrier protein [Lipid metabolism]
- COG0715 ABC-type nitrate/sulfonate/bicarbonate transport systems, periplasmic components [Inorganic ion transport and metabolism]
- COG2076 Membrane transporters of cations and cationic drugs [Inorganic ion transport and metabolism]
- COG3665 Uncharacterized conserved protein [Function unknown]

### 2.9.2 False positive rates and mini-*ykkC*

Because the mini-*ykkC* motif is small, false positives will inevitably be a problem in searches of large genome databases. A concern is that our mini-*ykkC* motif might be merely a subset of these false positives. The following results of automated refinement of the motif, however, argue against this concern. (Alignments discussed here appear in the following subsections.) CMfinder's initial alignment consisted of two unique sequences, both upstream of *emrE* (COG2076). After the RAVENNA homology search, CMfinder added one sequence, upstream of a gene containing allophanate hydrolase domains (pfam02626 and pfam02682). It was at this point that we saw the motif and decided to investigate it.

We ran another automated iteration of RAVENNA/CMfinder, and this resulted in four new sequences. Two were upstream of *emrE*, one was upstream of an allophanate hydrolase gene, and the remainder was upstream

- COG4770 Acetyl/propionyl-CoA carboxylase, alpha subunit [Lipid metabolism]
- pfam00893 Small Multidrug Resistance protein.
- pfam01425 Amidase.
- pfam02626 Allophanate hydrolase subunit 2.
- pfam02682 Allophanate hydrolase subunit 1.
- Note: various cation transporters appear in *ykkC* and mini-*ykkC*, although their CDD assignments are different.

of a Ca<sup>2+</sup>/H<sup>+</sup> antiporter (COG0387).

These data imply that mini-*ykkC* is a genuine motif for three reasons. Primarily, the seven sequences show considerable covariation in most of CMfinder's proposed base pairs, while conserving the ACGR loop motif. Second, the four gene families discussed above are common in our manual alignment of mini-*ykkC*. Finally, all but COG0387 are also found downstream of the *ykkC* motif, and COG0387 is a putative cation transporter, like many other *ykkC*-associated genes. Thus, while our manual alignment of mini-*ykkC* could contain an unknown number of false positives, the claim is secure that mini-*ykkC* is an RNA-like motif whose gene context resembles that of the *ykkC* motif. (Note: our manual alignment found four additional gene families typical of *ykkC*; see above.)



### 2.9.3 our manual mini-*ykkC* alignment, and gene context information

Notes:

- <sup>1</sup> Annotated start codon overlaps predicted RNA, but BLAST finds no homology with overlapping ORF. Correct start codon is unknown.
- <sup>2</sup> Annotated start codon lacked plausible Shine-Dalgarno, so a later start was selected. However, the earlier start did not overlap the RNA, so either start is consistent with our predictions.
- <sup>3</sup> Downstream gene points wrong way, but sequence homology suggests that the RNA may be functional.
- <sup>4</sup> RNA overlaps annotated gene. However, highly similar sequences annotate the homologous gene's start as being after the RNA.
- <sup>5</sup> According to BLAST, downstream gene is homology both to COG2076 (Membrane transporters of cations and cationic drugs) and *sugE*.
- <sup>6</sup> According to BLAST, downstream gene is homology both to allophanate hydrolase subunit 2 and urea amidolyase
- <sup>7</sup> According to BLAST, downstream gene is homology to *sugE*.
- <sup>8</sup> Predicted mini-*ykkC* overlaps 5' part of downstream gene, but BLAST finds no conservation of the overlapping coding region. We therefore selected a downstream start codon that is consistent with other mini-*ykkC* instances.
- <sup>9</sup> Deviates from consensus, but upstream of canonical mini-*ykkC* gene.
- <sup>10</sup> UCGA in loops violates consensus, but it is encouraging that both are the same. No detectable gene downstream, including by translated BLAST search; sequence fragment is truncated roughly 300 nucleotides after RNA.
- <sup>11</sup> Overlaps 3' end of hypothetical gene.
- <sup>12</sup> Overlaps 3' end of putative ATPase.
- <sup>13</sup> *sugE* gene overlaps RNA. However, BLAST reports no homology for the first 15 codons, which places the conserved part within the RNA. The first AUG within the RNA that is in-frame with the predicted ORF is beyond the structured region, and seems a plausible start codon.
- <sup>14</sup> Overlaps 3' end of putative ABC transporter.
- <sup>15</sup> Somewhat dubious. UCGA in loops violates consensus, although it is encouraging that both are the same. Stems have more A-U pairs than normal. This predicted mini-*ykkC* instance is the only predicted mini-*ykkC* within the taxon Bacteroidetes/Chlorobi. BLAST finds no significant homology for the downstream hypothetical gene.

#### abbrev. of hits

Cef-1-1 to Cef-1-1  
Cgl-1-1 to Cgl-1-2  
Bli-1-1 to Bli-1-1  
Pgi-1-1 to Pgi-1-1  
Gvi-1-1 to Gvi-1-1  
Ccr-1-1 to Ccr-1-1  
Csp-1-1 to Csp-1-1  
Asp-1-1 to Asp-1-1  
Bja-1-1 to Bja-1-1  
Nsp-1-1 to Nsp-1-1  
Nwi-1-1 to Nwi-1-1

#### taxonomy of species

Actinobacteria Actinobacteridae Actinomycetales Corynebacterineae Corynebacteriaceae *Corynebacterium efficiens* YS-314  
Actinobacteria Actinobacteridae Actinomycetales Corynebacterineae Corynebacteriaceae *Corynebacterium glutamicum* ATCC 13032  
Actinobacteria Actinobacteridae Actinomycetales Micrococcineae Brevibacteriaceae *Brevibacterium linens* BL2  
Bacteroidetes Bacteroidetes (class) Bacteroidales Porphyromonadaceae *Porphyromonas gingivalis* W83  
Cyanobacteria Gloeobacteria Gloeobacterales *Gloeobacter violaceus* PCC 7421  
 $\alpha$ -proteobacteria Caulobacterales Caulobacteraceae *Caulobacter crescentus* CB15  
 $\alpha$ -proteobacteria Caulobacterales Caulobacteraceae *Caulobacter sp.* K31  
 $\alpha$ -proteobacteria Rhizobiales Aurantimonadaceae *Aurantimonas sp.* SI85-9A1  
 $\alpha$ -proteobacteria Rhizobiales Bradyrhizobiaceae *Bradyrhizobium japonicum* USDA 110  
 $\alpha$ -proteobacteria Rhizobiales Bradyrhizobiaceae *Nitrobacter sp.* Nb-311A  
 $\alpha$ -proteobacteria Rhizobiales Bradyrhizobiaceae *Nitrobacter winogradskyi* Nb-255

|                      |                                                                                                                                            |
|----------------------|--------------------------------------------------------------------------------------------------------------------------------------------|
| Rpa-1-1 to Rpa-1-2   | $\alpha$ -proteobacteria Rhizobiales Bradyrhizobiaceae <i>Rhodopseudomonas palustris</i> BisA53                                            |
| Rpa-2-1 to Rpa-2-4   | $\alpha$ -proteobacteria Rhizobiales Bradyrhizobiaceae <i>Rhodopseudomonas palustris</i> BisB18                                            |
| Rpa-3-1 to Rpa-3-2   | $\alpha$ -proteobacteria Rhizobiales Bradyrhizobiaceae <i>Rhodopseudomonas palustris</i> BisB5                                             |
| Rpa-4-1 to Rpa-4-2   | $\alpha$ -proteobacteria Rhizobiales Bradyrhizobiaceae <i>Rhodopseudomonas palustris</i> CGA009                                            |
| Mlo-1-1 to Mlo-1-1   | $\alpha$ -proteobacteria Rhizobiales Phyllobacteriaceae <i>Mesorhizobium loti</i> MAFF303099                                               |
| Msp-1-1 to Msp-1-2   | $\alpha$ -proteobacteria Rhizobiales Phyllobacteriaceae <i>Mesorhizobium</i> sp. BNC1                                                      |
| Atu-1-1 to Atu-1-2   | $\alpha$ -proteobacteria Rhizobiales Rhizobiaceae Rhizobium/Agrobacterium group <i>Agrobacterium tumefaciens</i> str. C58                  |
| Ret-1-1 to Ret-1-2   | $\alpha$ -proteobacteria Rhizobiales Rhizobiaceae Rhizobium/Agrobacterium group <i>Rhizobium etli</i> CFN 42                               |
| Sme-1-1 to Sme-1-1   | $\alpha$ -proteobacteria Rhizobiales Rhizobiaceae Sinorhizobium/Ensifer group <i>Sinorhizobium meliloti</i> 1021                           |
| Xau-1-1 to Xau-1-2   | $\alpha$ -proteobacteria Rhizobiales Xanthobacteraceae <i>Xanthobacter autotrophicus</i> Py2                                               |
| Oal-1-1 to Oal-1-1   | $\alpha$ -proteobacteria Rhodobacterales Hyphomonadaceae <i>Oceanicaulis alexandrii</i> HTCC2633                                           |
| Jsp-1-1 to Jsp-1-1   | $\alpha$ -proteobacteria Rhodobacterales Rhodobacteraceae <i>Jannaschia</i> sp. CCS1                                                       |
| Oba-1-1 to Oba-1-2   | $\alpha$ -proteobacteria Rhodobacterales Rhodobacteraceae <i>Oceanicola batsensis</i> HTCC2597                                             |
| Ogr-1-1 to Ogr-1-1   | $\alpha$ -proteobacteria Rhodobacterales Rhodobacteraceae <i>Oceanicola granulosus</i> HTCC2516                                            |
| Rnu-1-1 to Rnu-1-1   | $\alpha$ -proteobacteria Rhodobacterales Rhodobacteraceae <i>Roseovarius nubinhibens</i> ISM                                               |
| Rsp-1-1 to Rsp-1-1   | $\alpha$ -proteobacteria Rhodobacterales Rhodobacteraceae <i>Roseovarius</i> sp. 217                                                       |
| Ssp-1-1 to Ssp-1-1   | $\alpha$ -proteobacteria Rhodobacterales Rhodobacteraceae <i>Sulfitobacter</i> sp. EE-36                                                   |
| Ssp-2-1 to Ssp-2-1   | $\alpha$ -proteobacteria Rhodobacterales Rhodobacteraceae <i>Sulfitobacter</i> sp. NAS-14.1                                                |
| Rba-1-1 to Rba-1-1   | $\alpha$ -proteobacteria Rhodobacterales bacterium HTCC2654                                                                                |
| Acr-1-1 to Acr-1-1   | $\alpha$ -proteobacteria Rhodospirillales Acetobacteraceae <i>Acidiphilium cryptum</i> JF-5                                                |
| Mma-1-1 to Mma-1-1   | $\alpha$ -proteobacteria Rhodospirillales Rhodospirillaceae <i>Magnetospirillum magneticum</i> AMB-1                                       |
| Rru-1-1 to Rru-1-1   | $\alpha$ -proteobacteria Rhodospirillales Rhodospirillaceae <i>Rhodospirillum rubrum</i> ATCC 11170                                        |
| Bbr-1-1 to Bbr-1-1   | $\beta$ -proteobacteria Burkholderiales Alcaligenaceae <i>Bordetella bronchiseptica</i> RB50                                               |
| Bpa-1-1 to Bpa-1-1   | $\beta$ -proteobacteria Burkholderiales Alcaligenaceae <i>Bordetella parapertussis</i> 12822                                               |
| Bam-1-1 to Bam-1-1   | $\beta$ -proteobacteria Burkholderiales Burkholderiaceae Burkholderia Burkholderia cepacia complex <i>Burkholderia ambifaria</i> AMMD      |
| Bce-1-1 to Bce-1-1   | $\beta$ -proteobacteria Burkholderiales Burkholderiaceae Burkholderia Burkholderia cepacia complex <i>Burkholderia cenocepacia</i> AU 1054 |
| Bce-2-1 to Bce-2-1   | $\beta$ -proteobacteria Burkholderiales Burkholderiaceae Burkholderia Burkholderia cepacia complex <i>Burkholderia cenocepacia</i> HI2424  |
| Bce-3-1 to Bce-3-1   | $\beta$ -proteobacteria Burkholderiales Burkholderiaceae Burkholderia Burkholderia cepacia complex <i>Burkholderia cenocepacia</i> PC184   |
| Bdo-1-1 to Bdo-1-1   | $\beta$ -proteobacteria Burkholderiales Burkholderiaceae Burkholderia Burkholderia cepacia complex <i>Burkholderia dolosa</i> AU0158       |
| Bsp-1-1 to Bsp-1-1   | $\beta$ -proteobacteria Burkholderiales Burkholderiaceae Burkholderia Burkholderia cepacia complex <i>Burkholderia</i> sp. 383             |
| Bvi-1-1 to Bvi-1-1   | $\beta$ -proteobacteria Burkholderiales Burkholderiaceae Burkholderia Burkholderia cepacia complex <i>Burkholderia vietnamiensis</i> G4    |
| Bma-1-1 to Bma-1-2   | $\beta$ -proteobacteria Burkholderiales Burkholderiaceae <i>Burkholderia mallei</i> 10229                                                  |
| Bma-2-1 to Bma-2-2   | $\beta$ -proteobacteria Burkholderiales Burkholderiaceae <i>Burkholderia mallei</i> 10399                                                  |
| Bma-3-1 to Bma-3-2   | $\beta$ -proteobacteria Burkholderiales Burkholderiaceae <i>Burkholderia mallei</i> 2002721280                                             |
| Bma-4-1 to Bma-4-2   | $\beta$ -proteobacteria Burkholderiales Burkholderiaceae <i>Burkholderia mallei</i> ATCC 23344                                             |
| Bma-5-1 to Bma-5-2   | $\beta$ -proteobacteria Burkholderiales Burkholderiaceae <i>Burkholderia mallei</i> FMH                                                    |
| Bma-6-1 to Bma-6-2   | $\beta$ -proteobacteria Burkholderiales Burkholderiaceae <i>Burkholderia mallei</i> GB8 horse 4                                            |
| Bma-7-1 to Bma-7-2   | $\beta$ -proteobacteria Burkholderiales Burkholderiaceae <i>Burkholderia mallei</i> JHU                                                    |
| Bma-8-1 to Bma-8-2   | $\beta$ -proteobacteria Burkholderiales Burkholderiaceae <i>Burkholderia mallei</i> NCTC 10247                                             |
| Bma-9-1 to Bma-9-1   | $\beta$ -proteobacteria Burkholderiales Burkholderiaceae <i>Burkholderia mallei</i> SAVP1                                                  |
| Bxe-1-1 to Bxe-1-1   | $\beta$ -proteobacteria Burkholderiales Burkholderiaceae <i>Burkholderia xenovorans</i> LB400                                              |
| Bps-1-1 to Bps-1-2   | $\beta$ -proteobacteria Burkholderiales Burkholderiaceae Burkholderia pseudomallei group <i>Burkholderia pseudomallei</i> 1106a            |
| Bps-2-1 to Bps-2-2   | $\beta$ -proteobacteria Burkholderiales Burkholderiaceae Burkholderia pseudomallei group <i>Burkholderia pseudomallei</i> 1106b            |
| Bps-3-1 to Bps-3-2   | $\beta$ -proteobacteria Burkholderiales Burkholderiaceae Burkholderia pseudomallei group <i>Burkholderia pseudomallei</i> 1655             |
| Bps-4-1 to Bps-4-2   | $\beta$ -proteobacteria Burkholderiales Burkholderiaceae Burkholderia pseudomallei group <i>Burkholderia pseudomallei</i> 1710a            |
| Bps-5-1 to Bps-5-2   | $\beta$ -proteobacteria Burkholderiales Burkholderiaceae Burkholderia pseudomallei group <i>Burkholderia pseudomallei</i> 1710b            |
| Bps-6-1 to Bps-6-2   | $\beta$ -proteobacteria Burkholderiales Burkholderiaceae Burkholderia pseudomallei group <i>Burkholderia pseudomallei</i> 406e             |
| Bps-7-1 to Bps-7-2   | $\beta$ -proteobacteria Burkholderiales Burkholderiaceae Burkholderia pseudomallei group <i>Burkholderia pseudomallei</i> 668              |
| Bps-8-1 to Bps-8-2   | $\beta$ -proteobacteria Burkholderiales Burkholderiaceae Burkholderia pseudomallei group <i>Burkholderia pseudomallei</i> K96243           |
| Bps-9-1 to Bps-9-2   | $\beta$ -proteobacteria Burkholderiales Burkholderiaceae Burkholderia pseudomallei group <i>Burkholderia pseudomallei</i> Pasteur          |
| Bps-10-1 to Bps-10-2 | $\beta$ -proteobacteria Burkholderiales Burkholderiaceae Burkholderia pseudomallei group <i>Burkholderia pseudomallei</i> S13              |
| Bth-1-1 to Bth-1-1   | $\beta$ -proteobacteria Burkholderiales Burkholderiaceae Burkholderia pseudomallei group <i>Burkholderia thailandensis</i> E264            |
| Reu-1-1 to Reu-1-1   | $\beta$ -proteobacteria Burkholderiales Burkholderiaceae Cupriavidus <i>Ralstonia eutropha</i> JMP134                                      |
| Pna-1-1 to Pna-1-1   | $\beta$ -proteobacteria Burkholderiales Comamonadaceae <i>Polaromonas naphthalenivorans</i> CJ2                                            |

|                      |                                                                                                                                        |
|----------------------|----------------------------------------------------------------------------------------------------------------------------------------|
| Neu-1-1 to Neu-1-1   | $\beta$ -proteobacteria Nitrosomonadales Nitrosomonadaceae <i>Nitrosomonas europaea</i> ATCC 19718                                     |
| Dar-1-1 to Dar-1-1   | $\beta$ -proteobacteria Rhodocyclales Rhodocyclaceae <i>Dechloromonas aromatica</i> RCB                                                |
| Gsu-1-1 to Gsu-1-1   | $\delta$ -proteobacteria Desulfuromonadales Geobacteraceae <i>Geobacter sulfurreducens</i> PCA                                         |
| Wsu-1-1 to Wsu-1-1   | $\epsilon$ -proteobacteria Campylobacteriales Helicobacteraceae <i>Wolinella succinogenes</i> DSM 1740                                 |
| Sde-1-1 to Sde-1-1   | $\gamma$ -proteobacteria Alteromonadales Alteromonadaceae <i>Saccharophagus degradans</i> 2-40                                         |
| Pat-1-1 to Pat-1-1   | $\gamma$ -proteobacteria Alteromonadales Pseudoalteromonadaceae <i>Pseudoalteromonas atlantica</i> T6c                                 |
| Pin-1-1 to Pin-1-1   | $\gamma$ -proteobacteria Alteromonadales Psychromonadaceae <i>Psychromonas ingrahamii</i> 37                                           |
| Sba-1-1 to Sba-1-1   | $\gamma$ -proteobacteria Alteromonadales Shewanellaceae <i>Shewanella baltica</i> OS155                                                |
| Sba-2-1 to Sba-2-1   | $\gamma$ -proteobacteria Alteromonadales Shewanellaceae <i>Shewanella baltica</i> OS195                                                |
| Sfr-1-1 to Sfr-1-1   | $\gamma$ -proteobacteria Alteromonadales Shewanellaceae <i>Shewanella frigidimarina</i> NCIMB 400                                      |
| Son-1-1 to Son-1-1   | $\gamma$ -proteobacteria Alteromonadales Shewanellaceae <i>Shewanella oneidensis</i> MR-1                                              |
| Spu-1-1 to Spu-1-1   | $\gamma$ -proteobacteria Alteromonadales Shewanellaceae <i>Shewanella putrefaciens</i> CN-32                                           |
| Ssp-3-1 to Ssp-3-1   | $\gamma$ -proteobacteria Alteromonadales Shewanellaceae <i>Shewanella</i> sp. ANA-3                                                    |
| Ssp-4-1 to Ssp-4-2   | $\gamma$ -proteobacteria Alteromonadales Shewanellaceae <i>Shewanella</i> sp. MR-4                                                     |
| Ssp-5-1 to Ssp-5-1   | $\gamma$ -proteobacteria Alteromonadales Shewanellaceae <i>Shewanella</i> sp. MR-7                                                     |
| Ssp-6-1 to Ssp-6-1   | $\gamma$ -proteobacteria Alteromonadales Shewanellaceae <i>Shewanella</i> sp. W3-18-1                                                  |
| Aeh-1-1 to Aeh-1-1   | $\gamma$ -proteobacteria Chromatiales Ectothiorhodospiraceae <i>Alkalilimnicola ehrlichei</i> MLHE-1                                   |
| Eco-1-1 to Eco-1-1   | $\gamma$ -proteobacteria Enterobacteriales Enterobacteriaceae <i>Escherichia coli</i> 101-1                                            |
| Eco-2-1 to Eco-2-1   | $\gamma$ -proteobacteria Enterobacteriales Enterobacteriaceae <i>Escherichia coli</i> 536                                              |
| Eco-3-1 to Eco-3-1   | $\gamma$ -proteobacteria Enterobacteriales Enterobacteriaceae <i>Escherichia coli</i> 53638                                            |
| Eco-4-1 to Eco-4-1   | $\gamma$ -proteobacteria Enterobacteriales Enterobacteriaceae <i>Escherichia coli</i> B171                                             |
| Eco-5-1 to Eco-5-1   | $\gamma$ -proteobacteria Enterobacteriales Enterobacteriaceae <i>Escherichia coli</i> B7A                                              |
| Eco-6-1 to Eco-6-1   | $\gamma$ -proteobacteria Enterobacteriales Enterobacteriaceae <i>Escherichia coli</i> CFT073                                           |
| Eco-7-1 to Eco-7-1   | $\gamma$ -proteobacteria Enterobacteriales Enterobacteriaceae <i>Escherichia coli</i> E110019                                          |
| Eco-8-1 to Eco-8-1   | $\gamma$ -proteobacteria Enterobacteriales Enterobacteriaceae <i>Escherichia coli</i> E22                                              |
| Eco-9-1 to Eco-9-1   | $\gamma$ -proteobacteria Enterobacteriales Enterobacteriaceae <i>Escherichia coli</i> E24377A                                          |
| Eco-10-1 to Eco-10-1 | $\gamma$ -proteobacteria Enterobacteriales Enterobacteriaceae <i>Escherichia coli</i> F11                                              |
| Eco-11-1 to Eco-11-1 | $\gamma$ -proteobacteria Enterobacteriales Enterobacteriaceae <i>Escherichia coli</i> HS                                               |
| Eco-12-1 to Eco-12-1 | $\gamma$ -proteobacteria Enterobacteriales Enterobacteriaceae <i>Escherichia coli</i> K12                                              |
| Eco-13-1 to Eco-13-1 | $\gamma$ -proteobacteria Enterobacteriales Enterobacteriaceae <i>Escherichia coli</i> O157:H7 EDL933                                   |
| Eco-14-1 to Eco-14-1 | $\gamma$ -proteobacteria Enterobacteriales Enterobacteriaceae <i>Escherichia coli</i> O157:H7 str. Sakai                               |
| Eco-15-1 to Eco-15-1 | $\gamma$ -proteobacteria Enterobacteriales Enterobacteriaceae <i>Escherichia coli</i> UT189                                            |
| Eco-16-1 to Eco-16-1 | $\gamma$ -proteobacteria Enterobacteriales Enterobacteriaceae <i>Escherichia coli</i> W3110                                            |
| Eca-1-1 to Eca-1-1   | $\gamma$ -proteobacteria Enterobacteriales Enterobacteriaceae <i>Pectobacterium Erwinia carotovora subsp. atroseptica</i> SCRI1043     |
| Plu-1-1 to Plu-1-1   | $\gamma$ -proteobacteria Enterobacteriales Enterobacteriaceae <i>Photobacterium luminescens subsp. laumondii</i> TTO1                  |
| Sen-1-1 to Sen-1-1   | $\gamma$ -proteobacteria Enterobacteriales Enterobacteriaceae <i>Salmonella enterica subsp. enterica serovar Paratyphi A</i> str. ATCC |
| Sen-3-1 to Sen-3-1   | $\gamma$ -proteobacteria Enterobacteriales Enterobacteriaceae <i>Salmonella enterica subsp. enterica serovar Typhi</i> str. CT18       |
| Sen-2-1 to Sen-2-1   | $\gamma$ -proteobacteria Enterobacteriales Enterobacteriaceae <i>Salmonella enterica subsp. enterica serovar Typhi</i> Ty2             |
| Sty-1-1 to Sty-1-1   | $\gamma$ -proteobacteria Enterobacteriales Enterobacteriaceae <i>Salmonella typhimurium</i> LT2                                        |
| Sbo-1-1 to Sbo-1-1   | $\gamma$ -proteobacteria Enterobacteriales Enterobacteriaceae <i>Shigella boydii</i> BS512                                             |
| Sbo-2-1 to Sbo-2-1   | $\gamma$ -proteobacteria Enterobacteriales Enterobacteriaceae <i>Shigella boydii</i> Sb227                                             |
| Sdy-1-1 to Sdy-1-1   | $\gamma$ -proteobacteria Enterobacteriales Enterobacteriaceae <i>Shigella dysenteriae</i> Sd197                                        |
| Sfl-1-1 to Sfl-1-1   | $\gamma$ -proteobacteria Enterobacteriales Enterobacteriaceae <i>Shigella flexneri</i> 2a str. 2457T                                   |
| Sfl-2-1 to Sfl-2-1   | $\gamma$ -proteobacteria Enterobacteriales Enterobacteriaceae <i>Shigella flexneri</i> 2a str. 301                                     |
| Sfl-3-1 to Sfl-3-1   | $\gamma$ -proteobacteria Enterobacteriales Enterobacteriaceae <i>Shigella flexneri</i> 5 str. 8401                                     |
| Sgl-1-1 to Sgl-1-1   | $\gamma$ -proteobacteria Enterobacteriales Enterobacteriaceae <i>Sodalis glossinidius</i> str. 'morsitans'                             |
| Ybc-1-1 to Ybc-1-1   | $\gamma$ -proteobacteria Enterobacteriales Enterobacteriaceae <i>Yersinia bercovieri</i> ATCC 43970                                    |
| Yfr-1-1 to Yfr-1-1   | $\gamma$ -proteobacteria Enterobacteriales Enterobacteriaceae <i>Yersinia frederiksenii</i> ATCC 33641                                 |
| Yin-1-1 to Yin-1-1   | $\gamma$ -proteobacteria Enterobacteriales Enterobacteriaceae <i>Yersinia intermedia</i> ATCC 29909                                    |
| Ype-1-1 to Ype-1-1   | $\gamma$ -proteobacteria Enterobacteriales Enterobacteriaceae <i>Yersinia pestis</i> Angola                                            |
| Ype-2-1 to Ype-2-1   | $\gamma$ -proteobacteria Enterobacteriales Enterobacteriaceae <i>Yersinia pestis</i> Antiqua                                           |
| Ype-6-1 to Ype-6-1   | $\gamma$ -proteobacteria Enterobacteriales Enterobacteriaceae <i>Yersinia pestis biovar Microtus</i> str. 91001                        |
| Ype-7-1 to Ype-7-1   | $\gamma$ -proteobacteria Enterobacteriales Enterobacteriaceae <i>Yersinia pestis biovar Orientalis</i> str. IP275                      |
| Ype-3-1 to Ype-3-1   | $\gamma$ -proteobacteria Enterobacteriales Enterobacteriaceae <i>Yersinia pestis</i> CO92                                              |

|                    |                  |                   |                    |                                                           |                             |
|--------------------|------------------|-------------------|--------------------|-----------------------------------------------------------|-----------------------------|
| Ype-4-1 to Ype-4-1 | γ-proteobacteria | Enterobacteriales | Enterobacteriaceae | <i>Yersinia pestis</i>                                    | KIM                         |
| Ype-5-1 to Ype-5-1 | γ-proteobacteria | Enterobacteriales | Enterobacteriaceae | <i>Yersinia pestis</i>                                    | Nepal516                    |
| Yps-1-1 to Yps-1-1 | γ-proteobacteria | Enterobacteriales | Enterobacteriaceae | <i>Yersinia pseudotuberculosis</i>                        | IP 31758                    |
| Yps-2-1 to Yps-2-1 | γ-proteobacteria | Enterobacteriales | Enterobacteriaceae | <i>Yersinia pseudotuberculosis</i>                        | IP 32953                    |
| Abo-1-1 to Abo-1-1 | γ-proteobacteria | Oceanospirillales | Alcanivoracaceae   | <i>Alcanivorax borkumensis</i>                            | SK2                         |
| Msp-2-1 to Msp-2-1 | γ-proteobacteria | Oceanospirillales |                    | <i>Marinomonas</i> sp.                                    | MED121                      |
| Osp-1-1 to Osp-1-1 | γ-proteobacteria | Oceanospirillales |                    | <i>Oceanobacter</i> sp.                                   | RED65                       |
| Asp-2-1 to Asp-2-1 | γ-proteobacteria | Pseudomonadales   | Moraxellaceae      | <i>Acinetobacter</i> sp.                                  | ADP1                        |
| Pae-1-1 to Pae-1-3 | γ-proteobacteria | Pseudomonadales   | Pseudomonadaceae   | <i>Pseudomonas aeruginosa</i>                             | 2192                        |
| Pae-2-1 to Pae-2-2 | γ-proteobacteria | Pseudomonadales   | Pseudomonadaceae   | <i>Pseudomonas aeruginosa</i>                             | C3719                       |
| Pae-3-1 to Pae-3-2 | γ-proteobacteria | Pseudomonadales   | Pseudomonadaceae   | <i>Pseudomonas aeruginosa</i>                             | PA7                         |
| Pae-4-1 to Pae-4-3 | γ-proteobacteria | Pseudomonadales   | Pseudomonadaceae   | <i>Pseudomonas aeruginosa</i>                             | PACS2                       |
| Pae-5-1 to Pae-5-3 | γ-proteobacteria | Pseudomonadales   | Pseudomonadaceae   | <i>Pseudomonas aeruginosa</i>                             | PAO1                        |
| Pae-6-1 to Pae-6-3 | γ-proteobacteria | Pseudomonadales   | Pseudomonadaceae   | <i>Pseudomonas aeruginosa</i>                             | UCBPP-PA14                  |
| Pen-1-1 to Pen-1-1 | γ-proteobacteria | Pseudomonadales   | Pseudomonadaceae   | <i>Pseudomonas entomophila</i>                            | L48                         |
| Pfl-1-1 to Pfl-1-1 | γ-proteobacteria | Pseudomonadales   | Pseudomonadaceae   | <i>Pseudomonas fluorescens</i>                            | PF-5                        |
| Pfl-2-1 to Pfl-2-2 | γ-proteobacteria | Pseudomonadales   | Pseudomonadaceae   | <i>Pseudomonas fluorescens</i>                            | PFO-1                       |
| Ppu-1-1 to Ppu-1-1 | γ-proteobacteria | Pseudomonadales   | Pseudomonadaceae   | <i>Pseudomonas putida</i>                                 | F1                          |
| Ppu-2-1 to Ppu-2-1 | γ-proteobacteria | Pseudomonadales   | Pseudomonadaceae   | <i>Pseudomonas putida</i>                                 | KT2440                      |
| Psy-1-1 to Psy-1-1 | γ-proteobacteria | Pseudomonadales   | Pseudomonadaceae   | <i>Pseudomonas syringae</i> pv. <i>phaseolicola</i>       | 1448A                       |
| Psy-2-1 to Psy-2-1 | γ-proteobacteria | Pseudomonadales   | Pseudomonadaceae   | <i>Pseudomonas syringae</i> pv. <i>syringae</i>           | B728a                       |
| Psy-3-1 to Psy-3-1 | γ-proteobacteria | Pseudomonadales   | Pseudomonadaceae   | <i>Pseudomonas syringae</i> pv. <i>tomato</i> str.        | DC3000                      |
| Val-1-1 to Val-1-1 | γ-proteobacteria | Vibrionales       | Vibrionaceae       | <i>Vibrio alginolyticus</i>                               | 12G01                       |
| Vch-1-1 to Vch-1-1 | γ-proteobacteria | Vibrionales       | Vibrionaceae       | <i>Vibrio cholerae</i>                                    | MO10                        |
| Vch-2-1 to Vch-2-1 | γ-proteobacteria | Vibrionales       | Vibrionaceae       | <i>Vibrio cholerae</i>                                    | O1 biovar eltor str. N16961 |
| Vch-3-1 to Vch-3-1 | γ-proteobacteria | Vibrionales       | Vibrionaceae       | <i>Vibrio cholerae</i>                                    | O395                        |
| Vch-4-1 to Vch-4-1 | γ-proteobacteria | Vibrionales       | Vibrionaceae       | <i>Vibrio cholerae</i>                                    | RC385                       |
| Vch-5-1 to Vch-5-1 | γ-proteobacteria | Vibrionales       | Vibrionaceae       | <i>Vibrio cholerae</i>                                    | V51                         |
| Vch-6-1 to Vch-6-1 | γ-proteobacteria | Vibrionales       | Vibrionaceae       | <i>Vibrio cholerae</i>                                    | V52                         |
| Vpa-1-1 to Vpa-1-1 | γ-proteobacteria | Vibrionales       | Vibrionaceae       | <i>Vibrio parahaemolyticus</i>                            | RIMD 2210633                |
| Vsp-1-1 to Vsp-1-1 | γ-proteobacteria | Vibrionales       | Vibrionaceae       | <i>Vibrio</i> sp.                                         | Ex25                        |
| Xca-1-1 to Xca-1-1 | γ-proteobacteria | Xanthomonadales   | Xanthomonadaceae   | <i>Xanthomonas campestris</i> pv. <i>campestris</i> str.  | 8004                        |
| Xca-2-1 to Xca-2-1 | γ-proteobacteria | Xanthomonadales   | Xanthomonadaceae   | <i>Xanthomonas campestris</i> pv. <i>campestris</i> str.  | ATCC 33913                  |
| Xor-1-1 to Xor-1-1 | γ-proteobacteria | Xanthomonadales   | Xanthomonadaceae   | <i>Xanthomonas oryzae</i> pv. <i>oryzae</i>               | KACC10331                   |
| Xor-2-1 to Xor-2-1 | γ-proteobacteria | Xanthomonadales   | Xanthomonadaceae   | <i>Xanthomonas oryzae</i> pv. <i>oryzae</i>               | MAFF 311018                 |
| Sen-4-1 to Sen-4-2 | γ-proteobacteria | Enterobacteriales | Enterobacteriaceae | <i>Salmonella enterica</i> subsp. <i>enterica</i> serovar | Choleraesuis str            |
| env-1 to env-10    |                  |                   |                    | environmental samples                                     |                             |

| abbrev  | RefSeq accession  |   | 5' at   | 3' at   | genes                                                                                      |
|---------|-------------------|---|---------|---------|--------------------------------------------------------------------------------------------|
| Osp-1-1 | NZ_AAQH01000002.1 | - | 112825  | 112760  | RNA→ COG4770 (COG4770)AHS2 (pfam02626)AHS1 (pfam02682)AccB (COG0511)→ Amidase (pfam01425)→ |
| Pen-1-1 | NC_008027.1       | - | 1469847 | 1469761 | RNA→ EmrE (COG2076)→                                                                       |
| Ppu-1-1 | NZ_AALM01000051.1 | + | 20063   | 20150   | RNA→ EmrE (COG2076)→                                                                       |
| Ppu-2-1 | NC_002947.3       | - | 1897151 | 1897065 | RNA→ EmrE (COG2076)→                                                                       |
| Pae-5-1 | NC_002516.2       | + | 3653053 | 3653143 | RNA→ EmrE (COG2076)→                                                                       |
| Pae-6-1 | NZ_AABQ07000001.1 | + | 953543  | 953633  | RNA→ EmrE (COG2076)→                                                                       |
| Pae-2-1 | NZ_AAKV01000043.1 | + | 2119    | 2209    | RNA→ EmrE (COG2076)→                                                                       |
| Pae-1-1 | NZ_AAKW01000028.1 | + | 300     | 390     | RNA→ EmrE (COG2076)→                                                                       |
| Pae-4-1 | NZ_AAQW01000001.1 | + | 4351419 | 4351509 | RNA→ EmrE (COG2076)→                                                                       |
| Pae-3-1 | NZ_AAQE01000062.1 | - | 30463   | 30376   | RNA→ EmrE (COG2076)→                                                                       |

|                      |                    |   |         |         |     |                                                  |
|----------------------|--------------------|---|---------|---------|-----|--------------------------------------------------|
| Oba-1-1              | NZ_AAAMO01000001.1 | + | 123399  | 123479  | RNA | → BTP (pfam05232) → 5-FTHF_cyc-lig (pfam01812) → |
| Oba-1-2              | NZ_AAAMO01000002.1 | + | 61290   | 61370   | RNA | → BTP (pfam05232) → 5-FTHF_cyc-lig (pfam01812) → |
| Sba-2-1              | NZ_AATK01000011.1  | + | 87254   | 87327   | RNA | → EmrE (COG2076) →                               |
| Sba-1-1              | NZ_AAIO01000002.1  | + | 35270   | 35343   | RNA | → EmrE (COG2076) →                               |
| Ssp-5-1              | NC_008322.1        | + | 1984998 | 1985070 | RNA | → EmrE (COG2076) →                               |
| Spu-1-1              | NZ_AALB01000014.1  | - | 56724   | 56651   | RNA | → EmrE (COG2076) →                               |
| Ssp-6-1              | NZ_AALN01000010.1  | + | 35498   | 35571   | RNA | → EmrE (COG2076) →                               |
| Ssp-4-1              | NC_008321.1        | + | 1903956 | 1904032 | RNA | → EmrE (COG2076) →                               |
| Ssp-3-1              | NZ_AALH01000010.1  | + | 34502   | 34578   | RNA | → EmrE (COG2076) →                               |
| Ssp-4-2              | NZ_AALX01000008.1  | + | 108108  | 108184  | RNA | → EmrE (COG2076) →                               |
| env-1                | AACY01003452.1     | + | 246     | 322     | RNA | → unknown →                                      |
| env-2                | AACY01010645.1     | - | 30763   | 30687   | RNA | → unknown →                                      |
| env-3                | AACY01051730.1     | - | 47405   | 47329   | RNA | → unknown →                                      |
| Son-1-1              | NC_004347.1        | + | 2001423 | 2001499 | RNA | → EmrE (COG2076) →                               |
| Yps-2-1              | NC_006155.1        | + | 487916  | 487993  | RNA | → Multi_Drug_Res (pfam00893) →                   |
| Ype-2-1              | NC_008150.1        | - | 4425181 | 4425104 | RNA | → Multi_Drug_Res (pfam00893) →                   |
| Ype-5-1              | NC_008149.1        | - | 3779292 | 3779215 | RNA | → Multi_Drug_Res (pfam00893) →                   |
| Ype-4-1              | NC_004088.1        | + | 692489  | 692566  | RNA | → Multi_Drug_Res (pfam00893) →                   |
| Ype-3-1              | NC_003143.1        | + | 366341  | 366418  | RNA | → Multi_Drug_Res (pfam00893) →                   |
| Ype-6-1              | NC_005810.1        | + | 547367  | 547444  | RNA | → Multi_Drug_Res (pfam00893) →                   |
| Ype-1-1              | NZ_AAKS01000043.1  | + | 17455   | 17532   | RNA | → Multi_Drug_Res (pfam00893) →                   |
| Yps-1-1              | NZ_AAKT01000001.1  | + | 3458104 | 3458181 | RNA | → Multi_Drug_Res (pfam00893) →                   |
| Ype-7-1              | NZ_AAOS01000048.1  | - | 15639   | 15562   | RNA | → Multi_Drug_Res (pfam00893) →                   |
| Ybe-1-1              | NZ_AALC01000031.1  | + | 22429   | 22506   | RNA | → Multi_Drug_Res (pfam00893) →                   |
| Yin-1-1              | NZ_AALF01000043.1  | + | 25328   | 25408   | RNA | → Multi_Drug_Res (pfam00893) →                   |
| <sup>2</sup> Yfr-1-1 | NZ_AALE01000017.1  | + | 76722   | 76802   | RNA | → Multi_Drug_Res (pfam00893) →                   |
| Bps-8-1              | NC_006350.1        | + | 1359248 | 1359329 | RNA | → EmrE (COG2076) →                               |
| Bma-4-1              | NC_006348.1        | - | 1960227 | 1960146 | RNA | → EmrE (COG2076) →                               |
| Bma-1-1              | NZ_AAHM02000001.1  | - | 797739  | 797658  | RNA | → EmrE (COG2076) →                               |
| Bma-2-1              | NZ_AAHN02000015.1  | + | 51107   | 51188   | RNA | → EmrE (COG2076) →                               |
| Bma-6-1              | NZ_AAHO01000018.1  | - | 71928   | 71847   | RNA | → EmrE (COG2076) →                               |
| Bma-8-1              | NZ_AAHP01000018.1  | - | 73502   | 73421   | RNA | → EmrE (COG2076) →                               |
| Bma-9-1              | NZ_AAHQ02000001.1  | - | 2089171 | 2089090 | RNA | → EmrE (COG2076) →                               |
| Bps-3-1              | NZ_AAHR02000067.1  | - | 3929    | 3848    | RNA | → EmrE (COG2076) →                               |
| Bps-7-1              | NZ_AAHU01000020.1  | + | 51134   | 51215   | RNA | → EmrE (COG2076) →                               |
| Bps-9-1              | NZ_AAHV02000030.1  | - | 72204   | 72123   | RNA | → EmrE (COG2076) →                               |
| Bma-5-1              | NZ_AAIQ02000015.1  | - | 74739   | 74658   | RNA | → EmrE (COG2076) →                               |
| Bma-7-1              | NZ_AAIR02000052.1  | - | 20120   | 20039   | RNA | → EmrE (COG2076) →                               |
| Bma-3-1              | NZ_AANX02000037.1  | - | 6000    | 5919    | RNA | → EmrE (COG2076) →                               |
| Bps-5-1              | NC_007434.1        | + | 1472149 | 1472230 | RNA | → EmrE (COG2076) →                               |
| Bps-4-1              | NZ_AAHS02000030.1  | + | 14417   | 14498   | RNA | → EmrE (COG2076) →                               |
| Bps-10-1             | NZ_AAHW02000015.1  | + | 51289   | 51370   | RNA | → EmrE (COG2076) →                               |
| Bps-1-1              | NZ_AAMA01000091.1  | + | 14429   | 14510   | RNA | → EmrE (COG2076) →                               |

|                      |                    |   |         |         |                     |
|----------------------|--------------------|---|---------|---------|---------------------|
| Bps-2-1              | NZ_AAAMB01000018.1 | - | 71919   | 71838   | RNA→EmrE (COG2076)→ |
| Bps-6-1              | NZ_AAAMM02000027.1 | + | 1635    | 1716    | RNA→EmrE (COG2076)→ |
| Bth-1-1              | NC_007651.1        | + | 1166403 | 1166484 | RNA→EmrE (COG2076)→ |
| Bce-1-1              | NC_008060.1        | - | 1851717 | 1851639 | RNA→EmrE (COG2076)→ |
| Bce-2-1              | NZ_AAHL01000002.1  | + | 215360  | 215438  | RNA→EmrE (COG2076)→ |
| Bce-3-1              | NZ_AAKX01000080.1  | + | 42964   | 43042   | RNA→EmrE (COG2076)→ |
| <sup>4</sup> Bvi-1-1 | NZ_AAEH02000013.1  | + | 160299  | 160377  | RNA→EmrE (COG2076)→ |
| <sup>7</sup> env-4   | AACY01057793.1     | + | 107368  | 107445  | RNA→unknown→        |
| <sup>4</sup> Bsp-1-1 | NC_007510.1        | - | 2708132 | 2708055 | RNA→EmrE (COG2076)→ |
| Bam-1-1              | NZ_AAJL01000016.1  | - | 32654   | 32577   | RNA→EmrE (COG2076)→ |
| Bdo-1-1              | NZ_AAKY01000050.1  | + | 24768   | 24845   | RNA→EmrE (COG2076)→ |
| <sup>5</sup> env-5   | AACY01023341.1     | + | 1360    | 1436    | RNA→unknown→        |
| Bxe-1-1              | NC_007951.1        | + | 1349400 | 1349474 | RNA→EmrE (COG2076)→ |
| Vch-2-1              | NC_002505.1        | + | 1484752 | 1484829 | RNA→EmrE (COG2076)→ |
| Vch-1-1              | NZ_AAKF01000013.1  | - | 39410   | 39333   | RNA→EmrE (COG2076)→ |
| Vch-3-1              | NZ_AAKG01000001.1  | + | 1043220 | 1043297 | RNA→EmrE (COG2076)→ |
| Vch-5-1              | NZ_AAKI01000006.1  | + | 34875   | 34952   | RNA→EmrE (COG2076)→ |
| Vch-6-1              | NZ_AAKJ01000010.1  | + | 11362   | 11439   | RNA→EmrE (COG2076)→ |
| Vch-4-1              | NZ_AAKH01000007.1  | - | 25723   | 25646   | RNA→EmrE (COG2076)→ |
| Val-1-1              | NZ_AAPS01000011.1  | - | 72329   | 72250   | RNA→EmrE (COG2076)→ |
| Vpa-1-1              | NC_004605.1        | + | 787489  | 787565  | RNA→EmrE (COG2076)→ |
| Vsp-1-1              | NZ_AAKK01000007.1  | - | 80612   | 80537   | RNA→EmrE (COG2076)→ |
| Pat-1-1              | NC_008228.1        | - | 1686458 | 1686380 | RNA→EmrE (COG2076)→ |
| Sen-1-1              | NC_006511.1        | + | 4331168 | 4331244 | RNA→EmrE (COG2076)→ |
| Sen-4-1              | NC_006905.1        | + | 4516129 | 4516205 | RNA→EmrE (COG2076)→ |
| Sty-1-1              | NC_003197.1        | + | 4581429 | 4581505 | RNA→EmrE (COG2076)→ |
| Sen-2-1              | NC_004631.1        | + | 4540824 | 4540900 | RNA→EmrE (COG2076)→ |
| Sen-3-1              | NC_003198.1        | + | 4557922 | 4557998 | RNA→EmrE (COG2076)→ |
| Eco-16-1             | AC_000091.1        | + | 4381485 | 4381560 | RNA→EmrE (COG2076)→ |
| Eco-12-1             | NC_000913.2        | + | 4374828 | 4374903 | RNA→EmrE (COG2076)→ |
| Eco-5-1              | NZ_AAJT01000005.1  | - | 59704   | 59629   | RNA→EmrE (COG2076)→ |
| Eco-8-1              | NZ_AAJV01000034.1  | + | 41002   | 41077   | RNA→EmrE (COG2076)→ |
| Eco-7-1              | NZ_AAJW01000004.1  | + | 193907  | 193982  | RNA→EmrE (COG2076)→ |
| Eco-4-1              | NZ_AAJX01000024.1  | + | 53773   | 53848   | RNA→EmrE (COG2076)→ |
| Eco-11-1             | NZ_AAJY01000001.1  | + | 4402101 | 4402176 | RNA→EmrE (COG2076)→ |
| Eco-9-1              | NZ_AAJZ01000001.1  | + | 2492556 | 2492631 | RNA→EmrE (COG2076)→ |
| Eco-1-1              | NZ_AAMK01000006.1  | + | 194583  | 194658  | RNA→EmrE (COG2076)→ |
| <sup>4</sup> Sdy-1-1 | NC_007606.1        | + | 4110745 | 4110820 | RNA→EmrE (COG2076)→ |
| Sbo-2-1              | NC_007613.1        | - | 4357286 | 4357211 | RNA→EmrE (COG2076)→ |
| Eco-14-1             | NC_002695.1        | + | 5231086 | 5231161 | RNA→EmrE (COG2076)→ |
| Eco-13-1             | NC_002655.2        | + | 5261071 | 5261146 | RNA→EmrE (COG2076)→ |
| Sbo-1-1              | NZ_AAKA01000002.1  | - | 207042  | 206967  | RNA→EmrE (COG2076)→ |
| Eco-3-1              | NZ_AAKB01000006.1  | + | 199084  | 199159  | RNA→EmrE (COG2076)→ |

|                      |                   |   |         |         |                                                                                            |
|----------------------|-------------------|---|---------|---------|--------------------------------------------------------------------------------------------|
| <sup>4</sup> Eco-2-1 | NC_008253.1       | + | 4606978 | 4607053 | RNA→ EmrE (COG2076)→                                                                       |
| Eco-15-1             | NC_007946.1       | + | 4648604 | 4648679 | RNA→ EmrE (COG2076)→                                                                       |
| Eco-6-1              | NC_004431.1       | + | 4985526 | 4985601 | RNA→ EmrE (COG2076)→                                                                       |
| Eco-10-1             | NZ_AAJU01000026.1 | + | 56626   | 56701   | RNA→ EmrE (COG2076)→                                                                       |
| <sup>4</sup> Sfl-3-1 | NC_008258.1       | + | 4449786 | 4449861 | RNA→ EmrE (COG2076)→                                                                       |
| Sfl-2-1              | NC_004337.1       | + | 4481192 | 4481267 | RNA→ EmrE (COG2076)→                                                                       |
| Sfl-1-1              | NC_004741.1       | + | 4473385 | 4473460 | RNA→ EmrE (COG2076)→                                                                       |
| <sup>4</sup> Sen-4-2 | NC_006856.1       | - | 72205   | 72131   | RNA→ EmrE (COG2076)→                                                                       |
| Gvi-1-1              | NC_005125.1       | - | 3187387 | 3187310 | RNA→ EmrE (COG2076)→                                                                       |
| Msp-1-1              | NC_008254.1       | + | 1077816 | 1077892 | RNA→ EmrE (COG2076)→                                                                       |
| Msp-1-2              | NZ_AAED02000011.1 | + | 121362  | 121438  | RNA→ EmrE (COG2076)→                                                                       |
| <sup>5</sup> env-6   | AACY01084250.1    | + | 426     | 503     | RNA→ unknown→                                                                              |
| <sup>2</sup> Nwi-1-1 | NC_007406.1       | + | 2219773 | 2219857 | RNA→ EmrE (COG2076)→                                                                       |
| <sup>8</sup> Bja-1-1 | NC_004463.1       | - | 4473831 | 4473748 | RNA→ EmrE (COG2076)→                                                                       |
| Nsp-1-1              | NZ_AAMY01000019.1 | - | 9610    | 9522    | RNA→ EmrE (COG2076)→                                                                       |
| Gsu-1-1              | NC_002939.4       | - | 755450  | 755372  | RNA→ EmrE (COG2076)→ UhpC (COG2271)→                                                       |
| Plu-1-1              | NC_005126.1       | - | 4818299 | 4818218 | RNA→ EmrE (COG2076)→                                                                       |
| Rru-1-1              | NC_007643.1       | + | 336932  | 337015  | RNA→ Small multidrug resistance protein→                                                   |
| Rpa-4-1              | NC_005296.1       | - | 1558599 | 1558516 | RNA→ COG3665 (COG3665)→ COG3665 (COG3665)→                                                 |
| Rpa-1-1              | NZ_AALA01000001.1 | - | 169823  | 169739  | AccB (COG0511)COG4770 (COG4770)AHS1 (pfam02682)→ Amidase (pfam01425)→                      |
| Rpa-3-1              | NC_007958.1       | + | 2440537 | 2440621 | RNA→ COG3665 (COG3665)→ COG3665 (COG3665)→                                                 |
| Rpa-2-1              | NC_007925.1       | - | 5064915 | 5064828 | COG4770 (COG4770)AHS1 (pfam02682)AccB (COG0511)→                                           |
| Rpa-2-2              | NZ_AALR01000001.1 | - | 61324   | 61237   | RNA→ COG3665 (COG3665)→ COG3665 (COG3665)→                                                 |
| Pae-5-2              | NC_002516.2       | + | 2052871 | 2052946 | AccB (COG0511)COG4770 (COG4770)AHS1 (pfam02682)→                                           |
| Pae-6-2              | NZ_AABQ07000002.1 | + | 1373619 | 1373694 | RNA→ EmrE (COG2076)→ NuoA (COG0838)→                                                       |
| Pae-2-2              | NZ_AAKV01000014.1 | + | 117148  | 117223  | RNA→ EmrE (COG2076)→ NuoA (COG0838)→                                                       |
| Pae-1-2              | NZ_AAKW01000013.1 | + | 5552    | 5627    | RNA→ EmrE (COG2076)→ NuoA (COG0838)→                                                       |
| Pae-4-2              | NZ_AAQW01000001.1 | + | 2613925 | 2614000 | RNA→ EmrE (COG2076)→ NuoA (COG0838)→                                                       |
| Pae-3-2              | NZ_AAQE01000010.1 | + | 122283  | 122358  | RNA→ EmrE (COG2076)→ NuoA (COG0838)→                                                       |
| Asp-1-1              | NZ_AAPJ01000003.1 | - | 422926  | 422845  | RNA→ BTP (pfam05232)→                                                                      |
| Rsp-1-1              | NZ_AAMV01000001.1 | + | 957202  | 957275  | RNA→ BTP (pfam05232)→ hypo→                                                                |
| Rba-1-1              | NZ_AAMT01000031.1 | - | 4129    | 4057    | RNA→ BTP (pfam05232)→                                                                      |
| Rpa-2-3              | NC_007925.1       | + | 3222811 | 3222888 | RNA→ EmrE (COG2076)→                                                                       |
| Rpa-2-4              | NZ_AALR01000002.1 | - | 59822   | 59745   | RNA→ EmrE (COG2076)→                                                                       |
| Eca-1-1              | NC_004547.2       | + | 2171193 | 2171271 | RNA→ AccB (COG0511)COG4770 (COG4770)AHS2 (pfam02626)AHS1 (pfam02682)→                      |
| <sup>6</sup> env-7   | AACY01195930.1    | + | 484     | 563     | RNA→ unknown→                                                                              |
| <sup>6</sup> env-8   | AACY01274299.1    | - | 294     | 212     | RNA→ unknown→                                                                              |
| Pfl-2-1              | NC_007492.1       | - | 1515939 | 1515859 | RNA→ AccB (COG0511)COG4770 (COG4770)AHS2 (pfam02626)AHS1 (pfam02682)→ Amidase (pfam01425)→ |
| Pna-1-1              | NZ_AANM01000030.1 | + | 36824   | 36895   | RNA→ COG4770 (COG4770)AHS2 (pfam02626)→ AccB (COG0511)AHS2 (pfam02626)AHS1 (pfam02682)→    |
|                      |                   |   |         |         | Amidase (pfam01425)→                                                                       |

|                       |                    |   |         |         |                                                                                            |
|-----------------------|--------------------|---|---------|---------|--------------------------------------------------------------------------------------------|
| Reu-1-1               | NC_007348.1        | - | 1606553 | 1606471 | RNA→ AccB (COG0511)COG4770 (COG4770)AHS2 (pfam02626)AHS1 (pfam02682)→ Amidase (pfam01425)→ |
| Sgl-1-1               | NC_007712.1        | + | 2850584 | 2850658 | RNA→ EmrE (COG2076)→                                                                       |
| <sup>13</sup> Mma-1-1 | NC_007626.1        | + | 1410471 | 1410551 | RNA→ EmrE (COG2076)→                                                                       |
| Sde-1-1               | NC_007912.1        | + | 1459868 | 1459944 | RNA→ AccB (COG0511)COG4770 (COG4770)AHS1 (pfam02682)→ Amidase (pfam01425)→                 |
| Msp-2-1               | NZ_AAANE01000002.1 | + | 193996  | 194070  | RNA→ AccB (COG0511)COG4770 (COG4770)AHS2 (pfam02626)AHS1 (pfam02682)→ Amidase (pfam01425)→ |
| Ssp-1-1               | NZ_AALV01000005.1  | - | 80416   | 80337   | hypo→ RNA→ BTP (pfam05232)→                                                                |
| Ssp-2-1               | NZ_AALZ01000005.1  | - | 234115  | 234036  | RNA→ BTP (pfam05232)→                                                                      |
| Oal-1-1               | NZ_AAMQ01000006.1  | - | 81077   | 81001   | RNA→ EmrE (COG2076)→                                                                       |
| Jsp-1-1               | NC_007802.1        | - | 1252878 | 1252804 | RNA→ EmrE (COG2076)→ cysteine_hydrolases (cd00431)→                                        |
| Dar-1-1               | NC_007298.1        | + | 88470   | 88546   | RNA→ AccB (COG0511)COG4770 (COG4770)AHS2 (pfam02626)AHS1 (pfam02682)→ Amidase (pfam01425)→ |
| Atu-1-1               | NC_003304.1        | + | 1627014 | 1627094 | RNA→ BTP (pfam05232)→                                                                      |
| Atu-1-2               | NC_003062.1        | + | 1626901 | 1626981 | RNA→ BTP (pfam05232)→                                                                      |
| Pfl-1-1               | NC_004129.6        | + | 5115326 | 5115409 | RNA→ EmrE (COG2076)→                                                                       |
| Bbr-1-1               | NC_002927.3        | + | 862218  | 862288  | RNA→ ChaA (COG0387)→                                                                       |
| Bpa-1-1               | NC_002928.3        | + | 777303  | 777373  | RNA→ COG5361 (COG5361)→                                                                    |
| Ccr-1-1               | NC_002696.2        | - | 3687061 | 3686980 | RNA→ EmrE (COG2076)→                                                                       |
| <sup>12</sup> Xau-1-1 | NZ_AAPC01000001.1  | + | 920657  | 920745  | RNA→ COG3665 (COG3665)→ COG3665 (COG3665)→                                                 |
| Pfl-2-2               | NC_007492.1        | - | 1858455 | 1858372 | AccB (COG0511)COG4770 (COG4770)AHS1 (pfam02682)→ probable urea amidolyase→                 |
| Xau-1-2               | NZ_AAPC01000001.1  | + | 37444   | 37526   | RNA→ EmrE (COG2076)→ KdsA (COG2877)→                                                       |
| <sup>14</sup> Ret-1-1 | NC_007765.1        | - | 143278  | 143199  | RNA→ COG3665 (COG3665)→ COG3665 (COG3665)→                                                 |
| <sup>2</sup> Cef-1-1  | NC_004369.1        | + | 1194192 | 1194276 | AccB (COG0511)COG4770 (COG4770)AHS1 (pfam02682)→ Amidase (pfam01425)→                      |
| Bli-1-1               | NZ_AAGP01000042.1  | - | 24816   | 24739   | RNA→ ChaA (COG0387)→ COG2120 (COG2120)→                                                    |
| <sup>9</sup> Asp-2-1  | NC_005966.1        | + | 680725  | 680803  | RNA→ EmrE (COG2076)→ Ada (COG0350)→                                                        |
| Neu-1-1               | NC_004757.1        | - | 2389363 | 2389281 | RNA→ EmrE (COG2076)→                                                                       |
| Ogr-1-1               | NZ_AAOT01000014.1  | + | 63921   | 64008   | RNA→ BTP (pfam05232)→                                                                      |
| Ret-1-2               | NC_007761.1        | + | 2332738 | 2332822 | RNA→ EmrE (COG2076)→                                                                       |
| Sme-1-1               | NC_003047.1        | + | 1498546 | 1498630 | RNA→ EmrE (COG2076)→                                                                       |
| Rnu-1-1               | NZ_AALY01000001.1  | - | 1481671 | 1481584 | RNA→ BTP (pfam05232)→                                                                      |
| Abo-1-1               | NC_008260.1        | + | 2165340 | 2165437 | RNA→ COG4770 (COG4770)AHS2 (pfam02626)AHS1 (pfam02682)AccB (COG0511)→                      |
| Wsu-1-1               | NC_005090.1        | + | 1071422 | 1071507 | RNA→ AccB (COG0511)COG4770 (COG4770)AHS2 (pfam02626)AHS1 (pfam02682)→ RarD (COG2962)→      |
| <sup>11</sup> Cgl-1-1 | NC_003450.3        | + | 1129574 | 1129660 | Amidase (pfam01425)→ ALLOPHANATE HYDROLASE→ HTH_ARSR (smart00418)→ ZntA (COG2217)→         |
| Cgl-1-2               | NC_006958.1        | + | 1131042 | 1131128 | RNA→ ChaA (COG0387)→ COG2120 (COG2120)→                                                    |
| Pae-5-3               | NC_002516.2        | - | 1934936 | 1934852 | RNA→ ChaA (COG0387)→ COG2120 (COG2120)→                                                    |
| Pae-4-3               | NZ_AAQW01000001.1  | - | 2495257 | 2495173 | RNA→ TauA (COG0715)→ AmiR (COG3707)→                                                       |
| Pae-6-3               | NZ_AABQ07000002.1  | - | 1253426 | 1253342 | RNA→ TauA (COG0715)→ AmiR (COG3707)→                                                       |
| Pae-1-3               | NZ_AAKW01000008.1  | - | 176158  | 176074  | RNA→ TauA (COG0715)→ AmiR (COG3707)→                                                       |
| Psy-3-1               | NC_004578.1        | + | 4775587 | 4775690 | RNA→ COG4770 (COG4770)AHS2 (pfam02626)AHS1 (pfam02682)AccB (COG0511)→ Amidase (pfam01425)→ |
| Psy-2-1               | NC_007005.1        | + | 4723995 | 4724098 | RNA→ COG4770 (COG4770)AHS2 (pfam02626)AHS1 (pfam02682)AccB (COG0511)→ Amidase (pfam01425)→ |
| Psy-1-1               | NC_005773.3        | + | 4535817 | 4535920 | RNA→ AccB (COG0511)COG4770 (COG4770)AHS2 (pfam02626)AHS1 (pfam02682)→ Amidase (pfam01425)→ |
| <sup>3</sup> env-9    | AACY01014706.1     | + | 332     | 411     | Transposase_mut (pfam00872)→ RNA→                                                          |



|                       |                   |   |         |         |      |                                                  |                                             |
|-----------------------|-------------------|---|---------|---------|------|--------------------------------------------------|---------------------------------------------|
| <sup>1</sup> Bps-8-2  | NC_006351.1       | + | 858880  | 858963  | RNA→ | OmpR (COG0745)→                                  |                                             |
| Bps-5-2               | NC_007435.1       | + | 2678630 | 2678713 | RNA→ | OmpR (COG0745)→                                  |                                             |
| Bma-4-2               | NC_006349.2       | + | 842068  | 842151  | RNA→ | OmpR (COG0745)→                                  |                                             |
| Bma-1-2               | NZ_AAHM02000002.1 | + | 25517   | 25600   | RNA→ | OmpR (COG0745)→                                  |                                             |
| Bma-2-2               | NZ_AAHN02000040.1 | - | 9516    | 9433    | RNA→ | OmpR (COG0745)→                                  |                                             |
| Bma-6-2               | NZ_AAHO01000096.1 | + | 9249    | 9332    | RNA→ | OmpR (COG0745)→                                  |                                             |
| Bma-8-2               | NZ_AAHP01000048.1 | - | 9408    | 9325    | RNA→ | OmpR (COG0745)→                                  |                                             |
| Bps-3-2               | NZ_AAHR02000013.1 | + | 121483  | 121566  | RNA→ | OmpR (COG0745)→                                  |                                             |
| Bps-4-2               | NZ_AAHS02000001.1 | + | 354812  | 354895  | RNA→ | OmpR (COG0745)→                                  |                                             |
| Bps-7-2               | NZ_AAHU01000026.1 | + | 90048   | 90131   | RNA→ | OmpR (COG0745)→                                  |                                             |
| Bps-9-2               | NZ_AAHV02000104.1 | - | 9383    | 9300    | RNA→ | OmpR (COG0745)→                                  |                                             |
| Bps-10-2              | NZ_AAHW02000030.1 | - | 9353    | 9270    | RNA→ | OmpR (COG0745)→                                  |                                             |
| Bma-5-2               | NZ_AAIQ02000066.1 | + | 16564   | 16647   | RNA→ | OmpR (COG0745)→                                  |                                             |
| Bma-7-2               | NZ_AAIR02000049.1 | + | 28076   | 28159   | RNA→ | OmpR (COG0745)→                                  |                                             |
| Bps-1-2               | NZ_AAMA01000020.1 | - | 9570    | 9487    | RNA→ | OmpR (COG0745)→                                  |                                             |
| Bps-2-2               | NZ_AAMB01000024.1 | - | 9345    | 9262    | RNA→ | OmpR (COG0745)→                                  |                                             |
| Bps-6-2               | NZ_AAMM02000026.1 | + | 58505   | 58588   | RNA→ | OmpR (COG0745)→                                  |                                             |
| Bma-3-2               | NZ_AANX02000032.1 | - | 9370    | 9287    | RNA→ | OmpR (COG0745)→                                  |                                             |
| <sup>10</sup> env-10  | AACY01772680.1    | + | 233     | 313     | RNA→ |                                                  |                                             |
| Xca-1-1               | NC_007086.1       | + | 577384  | 577505  | RNA→ | EmrE (COG2076)→                                  |                                             |
| Xca-2-1               | NC_003902.1       | + | 575294  | 575415  | RNA→ | EmrE (COG2076)→                                  |                                             |
| <sup>1</sup> Xor-1-1  | NC_006834.1       | - | 4433364 | 4433279 | RNA→ | EmrE (COG2076)→                                  |                                             |
| Xor-2-1               | NC_007705.1       | - | 4430838 | 4430753 | RNA→ | EmrE (COG2076)→                                  |                                             |
| Rpa-4-2               | NC_005296.1       | - | 2586491 | 2586351 | RNA→ | EmrE (COG2076)→                                  | Plasmid_killer (pfam05015)→ VapI (COG3093)→ |
| Rpa-3-2               | NC_007958.1       | - | 2608528 | 2608410 | RNA→ | EmrE (COG2076)→                                  |                                             |
| Rpa-1-2               | NZ_AALA01000013.1 | + | 14849   | 14990   | RNA→ | EmrE (COG2076)→                                  |                                             |
| <sup>1</sup> Sfr-1-1  | NZ_AAIV01000010.1 | + | 122744  | 122845  | RNA→ | hypo→                                            |                                             |
| Mlo-1-1               | NC_002678.2       | + | 3864262 | 3864387 | RNA→ | EmrE (COG2076)→                                  |                                             |
| Csp-1-1               | NZ_AATH01000001.1 | + | 336429  | 336571  | RNA→ | EmrE (COG2076)→                                  |                                             |
| Aeh-1-1               | NZ_AALK01000006.1 | - | 55971   | 55807   | RNA→ | Allophanate hydrolase→                           |                                             |
| <sup>12</sup> Acr-1-1 | NZ_AAOO01000022.1 | + | 8563    | 8750    | RNA→ | COG3665 (COG3665)→                               | COG3665 (COG3665)→                          |
|                       |                   |   |         |         | RNA→ | COG4770 (COG4770)AHS1 (pfam02682)AccB (COG0511)→ | Amidase (pfam01425)→                        |
| Pin-1-1               | NZ_AAQS01000011.1 | + | 97253   | 97514   | RNA→ | Na_H_antiport_1 (pfam06965)→                     |                                             |
| <sup>15</sup> Pgi-1-1 | NC_002950.2       | + | 1541841 | 1542127 | RNA→ | hypo→ STE14 (COG2020)→                           | UbiE (COG2226)→                             |

**cd00431** Cysteine hydrolases; This family contains amidohydrolases, like CSHase (N-carbamoylsarcosine amidohydrolase), involved in creatine metabolism and nicotinamide, converting nicotinamide to nicotinic acid and ammonia in the pyridine nucleotide cycle.

**COG0350** Methylated DNA-protein cysteine methyltransferase [DNA replication, recombination, and repair]

**COG0387** Ca<sup>2+</sup>/H<sup>+</sup> antiporter [Inorganic ion transport and metabolism]

**COG0511** Biotin carboxyl carrier protein [Lipid metabolism]

**COG0715** ABC-type nitrate/sulfonate/bicarbonate transport systems, periplasmic components [Inorganic ion transport and metabolism]

**COG0745** Response regulators consisting of a CheY-like receiver domain and a winged-helix DNA-binding domain [Signal transduction mechanisms / Transcription]

**COG0838** NADH:ubiquinone oxidoreductase subunit 3 (chain A) [Energy production and conversion]

**COG2020** Putative protein-S-isoprenylcysteine methyltransferase [Posttranslational







```

Oba-1-1 ..( 0 nucs)GGAG...CCAACCA..AUGGCG
Oba-1-2 ..( 0 nucs)GGAG...CCAACCC..AUGGCG
Sba-2-1 ..( 0 nucs)AGGAG...UUCACU...AUGAGU
Sba-1-1 ..( 0 nucs)AGGAG...UUCACU...AUGAGU
Ssp-5-1 ..( 0 nucs)GGAG...UUCUCC...AUGAGC
Spu-1-1 ..( 0 nucs)GGAG...UUCACU...AUGAGU
Ssp-4-1 ..( 0 nucs)GGGAG...UUCUCU...AUGAGC
Son-1-1 ..( 0 nucs)GGGAG...UUCUCU...AUGAGC
Yps-2-1 ..( 0 nucs)AGGUGG..UUACC...AUGGCU
Ybe-1-1 ..( 0 nucs)GAGGUGG.UUACC...AUGGCU
Yin-1-1 ..( 0 nucs)GAGGUGG.UUACC...AUGGCU
2Yfr-1-1 ..( 0 nucs)GAGGUGG.UUACC...AUGGCU
Bps-8-1 ..( 0 nucs)GGAGAG..UCUCCGC..AUGCCU
Bps-5-1 ..( 0 nucs)GGAGAG..UCUCCCC..AUGCCU
Bth-1-1 ..( 0 nucs)GGAG...AGUCUCGGAUGCCU
Bce-1-1 ..( 0 nucs)GGAG...UACGUCGAGAUGGCG
4Bvi-1-1 ..( 0 nucs)GGAG...UACGUCGAGAUGGCG
7env-4 ..( 0 nucs)GGAG...UACGUCGAGAUGGCG
4Bsp-1-1 ..( 0 nucs)GGAG...UACGUCGAGAUGGCG
Bam-1-1 ..( 0 nucs)GGAG...UAGGUCGAGAUGGCG
Bdo-1-1 ..( 0 nucs)GGAG...UACGUCGGAUGGCG
5env-5 ..( 0 nucs)GGAG...CUGUCUC..AUGUCC
Bxe-1-1 ..( 0 nucs)GGAG...CUUGUCUC.AUGUCC
Vch-2-1 ..( 0 nucs)GAGG...UGUAUUAU..AUGGCG
Vch-4-1 ..( 0 nucs)GAGG...UGUAUUAU..AUGGCG
Val-1-1 ..( 0 nucs)GGAA...AUGUGAC..AUGGCU
Vpa-1-1 ..( 0 nucs)GGAA...AUAUGAC..AUGGCU
Vsp-1-1 ..( 0 nucs)GGAA...AUAUGAC..AUGGCU
Pat-1-1 ..( 0 nucs)GGUAGG..UAUAAAA..AUGAAC
Sen-1-1 ..( 0 nucs)GGAG...CCUGCU...AUGUCC
Eco-16-1 ..( 0 nucs)GGAG...CCUGAU...AUGUCC
4Sdy-1-1 ..( 0 nucs)GGAG...CCUGAU...AUGUCC
4Eco-2-1 ..( 0 nucs)GGAG...CCUGAU...AUGUCC
4Sfl-3-1 ..( 0 nucs)GGAG...CCUGAU...AUGUCC
4Sen-4-2 ..( 0 nucs)GGAG...CCUGAU...AUGUCC
Gvi-1-1 ..( 0 nucs)AGGAGG..UGCGCC...AUGUCU
Msp-1-1 ..( 0 nucs)GGAG...AUCAGC...AUGGCC
5env-6 ..( 0 nucs)GGAA...UCUGCCUU..AUGUCC
2Nwi-1-1 ..( 0 nucs)GGAGG...ACCGC...AUGGCC
8Bja-1-1 ..( 0 nucs)GGAGG...GUCGUC...AUGGCC
Nsp-1-1 ..( 0 nucs)GGAGG...GCCAU...AUGGCC
Gsu-1-1 ..( 0 nucs)AGGACG..ACAUC...AUGACG
Plu-1-1 ..( 0 nucs)AUGGGG..CGUUGAU..AUGUCC
Rru-1-1 ..( 0 nucs)GGAGG...CAUCC...AUGGCU
Rpa-4-1 ..( 0 nucs)GAGGA...CAGC...AUGAUC
Rpa-1-1 ..( 0 nucs)GAGGA...CAACC...AUGAUC
Rpa-3-1 ..( 0 nucs)GAGGA...CAUCC...AUGAUC
Rpa-2-1 ..( 0 nucs)AAGGG...CAAUCC...AUGAUC
Pae-5-2 ..( 0 nucs)GAGG...CUGAAA...AUGGCG
Pae-3-2 ..( 0 nucs)AGAGG...CUGAAA...AUGGCG

.. .....
.. .....
-- RRRR○---●●●●○---AUG●●Y
SD+++++ AUG

```

```

Asp-1-1 ..( 0 nucs)AGCAGG..GUCGCC...AUGCGC
Rsp-1-1 ..( 0 nucs)GAGG...UCGCC...AUGCGC
Rba-1-1 ..( 0 nucs)GGGG...UUUCCC...AUGCGC
Rpa-2-3 ..( 0 nucs)GGAGG...UCGUC...AUGGCC
Eca-1-1 ..( 0 nucs)AUGAG...UCUAGCGU.AUGUUC
6 env-7 ..( 0 nucs)GAGGG...UUACUGAACAUUUU
6 env-8 ..( 0 nucs)GAGGG...UCACCCUG.AUGUUU
Pfl-2-1 ..( 0 nucs)AGGG...GUUUUGCC.AUGUUC
Pna-1-1 ..( 0 nucs)AGGGA...UUGCCC...AUGUUC
Reu-1-1 ..( 0 nucs)GAGGGA..ACAUCCCC.AUGUCC
Sgl-1-1 ..( 0 nucs)GGAA...AACGUCCU.AUGCAG
13 Mma-1-1 ..( 0 nucs)GGAG...CAUGGUCACAUGCCG
Sde-1-1 ..( 0 nucs)GGUA...UUUAACUU.AUGUUC
Msp-2-1 ..( 0 nucs)GGAG...CCGUU...AUGUUU
Ssp-1-1 ..( 0 nucs)GAGG...UAUAAC...AUGCGC
Oal-1-1 ..( 0 nucs)AAGG...UUUCGACC.AUGGCC
Jsp-1-1 ..( 0 nucs)GGAGG...UCUAA...AUGGCU
Dar-1-1 ..( 0 nucs)GAGACG..ACAAC...AUGUUC
Atu-1-1 ..( 0 nucs)GGAG...AAUGAA...AUGCGC
Pfl-1-1 ..( 0 nucs)GAGG...UAGGC...AUGUCC
Bbr-1-1 ..( 0 nucs)GAGA...UCCCAUCC.GUGUCG
12 Ccr-1-1 ..( 0 nucs)AGUGGG..GCUGUC..GUGGCC
Xau-1-1 ..( 0 nucs)AGGAG...ACACGAC..AUGACC
Pfl-2-2 ..( 0 nucs)GGAGG...UCUUUC...AUGUCC
14 Xau-1-2 ..( 0 nucs)GAGG...UACCCGCCAAUGGCG
Ret-1-1 ..( 0 nucs)GGAGA...GACGCU...AUGAUG
2 Cef-1-1 ..( 0 nucs)AGGAUG..UUCACC...AUGCCG
Bli-1-1 ..( 0 nucs)AGGA...AUUCCGUGAUGACU
9 Asp-2-1 ..( 0 nucs)AGGA...AAGCAAU..AUGGCU
Neu-1-1 ..( 0 nucs)GGAGA...UGAG...AUGGCU
Ogr-1-1 ..( 0 nucs)GGAG...CAUCACC..UUGCGC
Ret-1-2 ..( 0 nucs)AGGAG...AGGCGU...AUGGCC
Sme-1-1 ..( 0 nucs)GGAG...UUGGAA...AUGGCC
Rnu-1-1 ..( 0 nucs)AGGAG...AUCUGCC..AUGCGC
Abo-1-1 ..( 0 nucs)GAGAA...AAAGUC...AUGUUC
Wsu-1-1 ..( 0 nucs)GAGGA...ACCACU...AUGUUU
11 Cgl-1-1 ..( 0 nucs)AGAG...AAC.....AUGCCG
Pae-5-3 ..( 0 nucs)GAGGUGG.UG.....AUGACA
Pae-6-3 ..( 0 nucs)GAGG...UGGUG...AUGACA
Psy-3-1 GU( 4 nucs)GUGG...UUUAGCC..AUGUUC
Psy-2-1 GU( 4 nucs)GGGG...UUUAGCC..AUGUUC
Psy-1-1 GG( 5 nucs)GGGG...UUUAGCC..AUGUUC
3 env-9 A.( 0 nucs).....
1 Bps-8-2 C.( 0 nucs).....
10 env-10 ..( 0 nucs).....
Xca-1-1 UU( 18 nucs)AGGAG...UGAUGUG..AUGCCC
1 Xor-1-1 UU( 0 nucs).....
Rpa-4-2 CG( 46 nucs)AGGAGG..CCGCU...AUGGCU
Rpa-3-2 GC( 24 nucs)AGGAGG..CCCUC...AUGGCU
Rpa-1-2 GC( 47 nucs)AAGGG...GGCCCG...AUGGCC

.. .....
.. .....
-- RRRR○---●●●●○---AUG●●Y
SD+++++ AUG

```







alignment positions 1...60

```

Bma-1-1 UGCUGGC. GGGGACGACCCG...GGCCGU. CGAUGUUAAC...GGGACGACCC
Bth-1-1 CCGCUGGC. GGGGACGACCCG...GGCCGU. CGAUGUUAAC...GGGACGACCC
Bce-1-1 GGC CCGC. GGGGACGACCCG...GGCCAUUCGU. UCAAC...GGGACGGCCC
Dar-1-1 CAG. CUU. CCGGACGACCCG...AGG...C. AAAAGAAUCCGG. GGGACGACCC
Reu-1-1 GGC CCGC. GGGGACGACCCG...GGC...CGAUACGAAACGG. CAGGACGACCC
Bbr-1-1 AUCCCGG. CCGGACGACCCG...CGC...G. UGUACUGGCCU. GAGGACGACCC
Neu-1-1 UCC. UGAUUGAGGACGACCCUACUUCG...GGACAAUCUACUACCGGACGACCC
<<<. <<<. <<<<<. >>>>>. >>>. >>>.....<<<<<. >>>>
???. 222. 22200...00222...222...2???. 2200...0022
●Y●○○●Y●-Y●●GGACGACC●R---●G●----●○○YR●●G●RC○○○-●RGGACGACCY●

```

## 2.10 The *purD* motif

### 2.10.1 In-line probing

Using in-line probing, we tested whether *purD* RNA can bind each of several metabolites. We tested two RNA molecules, of different lengths, both from *Campylobacter jejuni subsp. jejuni* NCTC 11168, RefSeq accession NC\_002163.1

The “small” RNA is

```

GUGAUCCAACACAUUUUUAUUAACUGCGAUUGUGUGAUUUACCGUGUUCUGUGGCAUCGU
UUGAGCUUUGAAAAAAGCGAGAAGUUGCAGCCUUUAAAAAUACCUAGCGGUUUUCUUUG
ACUUUUUG

```

The “long” RNA is extended on the 3’ end. Its sequence is

```

GUGAUCCAACACAUUUUUAUUAACUGCGAUUGUGUGAUUUACCGUGUUCUGUGGCAUCGU
UUGAGCUUUGAAAAAAGCGAGAAGUUGCAGCCUUUAAAAAUACCUAGCGGUUUUCUUUG
ACUUUUUGGGGUCAAUCUUUGUUAACGGCUGUUUGGGUUUAAAAGG

```

The concentrations of compounds used were dictated by the fact that many purine derivatives are not highly soluble.

The following compounds were tested with both the short and long RNAs: 100 μM guanine, adenine, GAR and AICAR ribotide. We also tested AIR. Since this stock was old and AIR is unstable in solution, we tested at the ideal concentrations of 3.8 mM and 100 μM, but we expect the true concentration were lower, due to degradation.

The following compounds were tested with the long RNA only: 10 μM 2’deoxyguanosine 3’P, deoxyguanosine, 3’deoxyguanosine, adenosine, guanosine, ATP, GTP, GDP, G2’MP, GMP, dATP, dGTP, dGDP, dAMP, dGMP, 2’deoxyadenosine, 2’deoxyguanosine.

We found no evidence of structural modulation of the RNA with any of these compounds.

## 2.10.2 Genome context and alignment

| abbrev. of hits    | taxonomy of species                                                                                                         |
|--------------------|-----------------------------------------------------------------------------------------------------------------------------|
| Cco-1-1 to Cco-1-1 | $\epsilon$ -proteobacteria Campylobacterales Campylobacteraceae <i>Campylobacter coli</i> RM2228                            |
| Cco-2-1 to Cco-2-1 | $\epsilon$ -proteobacteria Campylobacterales Campylobacteraceae <i>Campylobacter concisus</i> 13826                         |
| Ccu-1-1 to Ccu-1-1 | $\epsilon$ -proteobacteria Campylobacterales Campylobacteraceae <i>Campylobacter curvus</i> 525.92                          |
| Cfe-1-1 to Cfe-1-1 | $\epsilon$ -proteobacteria Campylobacterales Campylobacteraceae <i>Campylobacter fetus</i> subsp. <i>fetus</i> 82-40        |
| Cje-1-1 to Cje-1-1 | $\epsilon$ -proteobacteria Campylobacterales Campylobacteraceae <i>Campylobacter jejuni</i> RM1221                          |
| Cje-2-1 to Cje-2-1 | $\epsilon$ -proteobacteria Campylobacterales Campylobacteraceae <i>Campylobacter jejuni</i> subsp. <i>doylei</i> 269.97     |
| Cje-3-1 to Cje-3-1 | $\epsilon$ -proteobacteria Campylobacterales Campylobacteraceae <i>Campylobacter jejuni</i> subsp. <i>jejuni</i> 260.94     |
| Cje-4-1 to Cje-4-2 | $\epsilon$ -proteobacteria Campylobacterales Campylobacteraceae <i>Campylobacter jejuni</i> subsp. <i>jejuni</i> 81-176     |
| Cje-5-1 to Cje-5-1 | $\epsilon$ -proteobacteria Campylobacterales Campylobacteraceae <i>Campylobacter jejuni</i> subsp. <i>jejuni</i> 84-25      |
| Cje-6-1 to Cje-6-1 | $\epsilon$ -proteobacteria Campylobacterales Campylobacteraceae <i>Campylobacter jejuni</i> subsp. <i>jejuni</i> CF93-6     |
| Cje-7-1 to Cje-7-1 | $\epsilon$ -proteobacteria Campylobacterales Campylobacteraceae <i>Campylobacter jejuni</i> subsp. <i>jejuni</i> HB93-13    |
| Cje-8-1 to Cje-8-1 | $\epsilon$ -proteobacteria Campylobacterales Campylobacteraceae <i>Campylobacter jejuni</i> subsp. <i>jejuni</i> NCTC 11168 |
| Cla-1-1 to Cla-1-1 | $\epsilon$ -proteobacteria Campylobacterales Campylobacteraceae <i>Campylobacter lari</i> RM2100                            |
| Cup-1-1 to Cup-1-1 | $\epsilon$ -proteobacteria Campylobacterales Campylobacteraceae <i>Campylobacter upsaliensis</i> RM3195                     |
| Hac-1-1 to Hac-1-1 | $\epsilon$ -proteobacteria Campylobacterales Helicobacteraceae <i>Helicobacter acinonychis</i> str. Sheeba                  |
| Hhe-1-1 to Hhe-1-1 | $\epsilon$ -proteobacteria Campylobacterales Helicobacteraceae <i>Helicobacter hepaticus</i> ATCC 51449                     |
| Hpy-1-1 to Hpy-1-1 | $\epsilon$ -proteobacteria Campylobacterales Helicobacteraceae <i>Helicobacter pylori</i> 26695                             |
| Hpy-2-1 to Hpy-2-1 | $\epsilon$ -proteobacteria Campylobacterales Helicobacteraceae <i>Helicobacter pylori</i> HPAG1                             |
| Tde-1-1 to Tde-1-1 | $\epsilon$ -proteobacteria Campylobacterales Helicobacteraceae <i>Thiomicrospira denitrificans</i> ATCC 33889               |
| Wsu-1-1 to Wsu-1-1 | $\epsilon$ -proteobacteria Campylobacterales Helicobacteraceae <i>Wolinella succinogenes</i> DSM 1740                       |

| abbrev  | RefSeq accession  |   | 5' at   | 3' at   | genes                                                                                                             |
|---------|-------------------|---|---------|---------|-------------------------------------------------------------------------------------------------------------------|
| Hpy-2-1 | NC_008086.1       | - | 1226386 | 1226207 | RNA → PurD (COG0151) → RDD (pfam06271) → Imp (COG1452) → COG1926 (COG1926) → Pnp (COG1185) →                      |
| Hpy-1-1 | NC_000915.1       | - | 1295565 | 1295386 | RNA → PurD (COG0151) → hypo → Imp (COG1452) → hypo → COG1926 (COG1926) → Pnp (COG1185) →                          |
| Hac-1-1 | NC_008229.1       | - | 1390725 | 1390548 | RNA → PurD (COG0151) → hypo → Imp (COG1452) → COG1926 (COG1926) → Pnp (COG1185) →                                 |
| Hhe-1-1 | NC_004917.1       | - | 579160  | 578967  | RNA → PurD (COG0151) → RDD (pfam06271) → Imp (COG1452) → COG1926 (COG1926) → Pnp (COG1185) →                      |
| Wsu-1-1 | NC_005090.1       | + | 844000  | 844211  | RNA → PurD (COG0151) → RDD (pfam06271) → Imp (COG1452) → Ttg2C (COG1463) →<br>COG1926 (COG1926) → Pnp (COG1185) → |
| Ccu-1-1 | NZ_AAAR01000020.1 | + | 17545   | 17732   | RNA → PurD (COG0151) → RDD (pfam06271) → Imp (COG1452) → COG1926 (COG1926) → Pnp (COG1185) →                      |
| Cco-2-1 | NZ_AAQZ01000001.1 | - | 131159  | 130972  | RNA → PurD (COG0151) → RDD (pfam06271) → Imp (COG1452) → COG1926 (COG1926) → Pnp (COG1185) →                      |
| Cfe-1-1 | NZ_AANR02000001.1 | - | 1253272 | 1253081 | RNA → PurD (COG0151) → RDD (pfam06271) → Imp (COG1452) → COG1926 (COG1926) → Pnp (COG1185) →                      |
| Cje-2-1 | NZ_AARB01000012.1 | - | 8787    | 8605    | RNA → PurD (COG0151) → RDD (pfam06271) → Imp (COG1452) → Pnp (COG1185) →                                          |
| Cje-8-1 | NC_002163.1       | + | 1179610 | 1179792 | RNA → PurD (COG0151) → RDD (pfam06271) → Imp (COG1452) → Pnp (COG1185) →                                          |
| Cje-6-1 | NZ_AANJ01000010.1 | + | 29408   | 29590   | RNA → PurD (COG0151) → RDD (pfam06271) → Imp (COG1452) → Pnp (COG1185) →                                          |
| Cje-7-1 | NZ_AANQ01000001.1 | - | 423569  | 423387  | RNA → PurD (COG0151) → RDD (pfam06271) → Imp (COG1452) → Pnp (COG1185) →                                          |
| Cje-5-1 | NZ_AANT02000001.1 | - | 475699  | 475517  | RNA → PurD (COG0151) → RDD (pfam06271) → Imp (COG1452) → Pnp (COG1185) →                                          |
| Cje-1-1 | NC_003912.7       | + | 1300389 | 1300571 | RNA → PurD (COG0151) → RDD (pfam06271) → Imp (COG1452) → Pnp (COG1185) →                                          |
| Cje-3-1 | NZ_AANK01000001.1 | - | 129510  | 129328  | RNA → PurD (COG0151) → RDD (pfam06271) → Imp (COG1452) → Pnp (COG1185) →                                          |
| Cje-4-1 | NZ_AANY01000002.1 | + | 30153   | 30335   | RNA → PurD (COG0151) → RDD (pfam06271) → Imp (COG1452) → Pnp (COG1185) →                                          |
| Cje-4-2 | NZ_AASL01000001.1 | + | 1180898 | 1181080 | RNA →                                                                                                             |
| Cco-1-1 | NZ_AAF01000002.1  | - | 145403  | 145219  | RNA → PurD (COG0151) → RDD (pfam06271) → Imp (COG1452) → Pnp (COG1185) →                                          |
| Cup-1-1 | NZ_AAFJ01000002.1 | + | 15693   | 15872   | RNA → PurD (COG0151) → RDD (pfam06271) → Imp (COG1452) → Pnp (COG1185) →                                          |
| Cla-1-1 | NZ_AAFK01000006.1 | + | 40242   | 40434   | RNA → PurD (COG0151) → RDD (pfam06271) → Imp (COG1452) → COG1926 (COG1926) →                                      |
| Tde-1-1 | NC_007575.1       | + | 424828  | 425074  | RNA → PurD (COG0151) → RDD (pfam06271) → Imp (COG1452) → COG1926 (COG1926) → Pnp (COG1185) →                      |



## 2.11 The 6C motif

6C is typically moderately far (100-300 nucleotides) from the start codon, so the start codon is not shown with the motif.

Notes:

- <sup>1</sup> Unusual gene context (downstream gene points wrong way), though RNA fits consensus reasonably well. May be false positive. tually the first 1 Kb) is not conserved.
- <sup>2</sup> Appears to overlap 5' coding part of type II secretion gene ZP00619578.1, but BLAST shows that this part of the gene (ac-  
<sup>3</sup> Appears to overlap 5' coding part of hypothetical gene NP736907.1, but BLAST shows this part of gene is not conserved.

### abbrev. of hits

Cdi-1-1 to Cdi-1-1  
Cef-1-1 to Cef-1-1  
Cgl-1-1 to Cgl-1-2  
Mfl-1-1 to Mfl-1-1  
Msp-1-1 to Msp-1-1  
Msp-2-1 to Msp-2-1  
Msp-3-1 to Msp-3-1  
Mva-1-1 to Mva-1-1  
Mav-1-1 to Mav-1-1  
Mbo-1-1 to Mbo-1-1  
Mtu-1-1 to Mtu-1-1  
Mtu-2-1 to Mtu-2-1  
Mtu-3-1 to Mtu-3-1  
Mtu-4-1 to Mtu-4-1  
Nfa-1-1 to Nfa-1-2  
Rsp-1-1 to Rsp-1-1  
Ace-1-1 to Ace-1-1  
Fal-1-1 to Fal-1-1  
Kra-1-1 to Kra-1-1  
Jsp-1-1 to Jsp-1-1  
Str-1-1 to Str-1-1  
Sav-1-1 to Sav-1-1  
Sco-1-1 to Sco-1-1  
Tfu-1-1 to Tfu-1-1  
mac-1-1 to mac-1-1

### taxonomy of species

Actinobacteria Actinobacteridae Actinomycetales Corynebacterineae Corynebacteriaceae *Corynebacterium diphtheriae* NCTC 13129  
Actinobacteria Actinobacteridae Actinomycetales Corynebacterineae Corynebacteriaceae *Corynebacterium efficiens* YS-314  
Actinobacteria Actinobacteridae Actinomycetales Corynebacterineae Corynebacteriaceae *Corynebacterium glutamicum* ATCC 13032  
Actinobacteria Actinobacteridae Actinomycetales Corynebacterineae Mycobacteriaceae *Mycobacterium flavescens* PYR-GCK  
Actinobacteria Actinobacteridae Actinomycetales Corynebacterineae Mycobacteriaceae *Mycobacterium* sp. JLS  
Actinobacteria Actinobacteridae Actinomycetales Corynebacterineae Mycobacteriaceae *Mycobacterium* sp. KMS  
Actinobacteria Actinobacteridae Actinomycetales Corynebacterineae Mycobacteriaceae *Mycobacterium* sp. MCS  
Actinobacteria Actinobacteridae Actinomycetales Corynebacterineae Mycobacteriaceae *Mycobacterium vanbaalenii* PYR-1  
Actinobacteria Actinobacteridae Actinomycetales Corynebacterineae Mycobacteriaceae *Mycobacterium avium* subsp. *paratuberculosis* K-10  
Actinobacteria Actinobacteridae Actinomycetales Corynebacterineae Mycobacteriaceae *Mycobacterium bovis* AF2122/97  
Actinobacteria Actinobacteridae Actinomycetales Corynebacterineae Mycobacteriaceae *Mycobacterium tuberculosis* C  
Actinobacteria Actinobacteridae Actinomycetales Corynebacterineae Mycobacteriaceae *Mycobacterium tuberculosis* CDC1551  
Actinobacteria Actinobacteridae Actinomycetales Corynebacterineae Mycobacteriaceae *Mycobacterium tuberculosis* F11  
Actinobacteria Actinobacteridae Actinomycetales Corynebacterineae Mycobacteriaceae *Mycobacterium tuberculosis* H37Rv  
Actinobacteria Actinobacteridae Actinomycetales Corynebacterineae Nocardiaceae *Nocardia farcinica* IFM 10152  
Actinobacteria Actinobacteridae Actinomycetales Corynebacterineae Nocardiaceae *Rhodococcus* sp. RHA1  
Actinobacteria Actinobacteridae Actinomycetales Frankineae Acidothermaceae *Acidothermus cellulolyticus* 11B  
Actinobacteria Actinobacteridae Actinomycetales Frankineae Frankiaceae *Frankia alni* ACN14a  
Actinobacteria Actinobacteridae Actinomycetales Frankineae Kineosporiaceae *Kineococcus radiotolerans* SRS30216  
Actinobacteria Actinobacteridae Actinomycetales Micrococcineae Intrasporangiaceae *Janibacter* sp. HTCC2649  
Actinobacteria Actinobacteridae Actinomycetales Micromonosporineae Micromonosporaceae *Salinispora tropica* CNB-440  
Actinobacteria Actinobacteridae Actinomycetales Streptomycineae Streptomycetaceae *Streptomyces avermitilis* MA-4680  
Actinobacteria Actinobacteridae Actinomycetales Streptomycineae Streptomycetaceae *Streptomyces coelicolor* A3(2)  
Actinobacteria Actinobacteridae Actinomycetales Streptosporangineae Nocardioptaceae *Thermobifida fusca* YX  
Actinobacteria marine actinobacterium PHSC20C1

| abbrev               | RefSeq accession  |   | 5' at   | 3' at   | genes                                                                                                                                                                           |
|----------------------|-------------------|---|---------|---------|---------------------------------------------------------------------------------------------------------------------------------------------------------------------------------|
| <sup>1</sup> Nfa-1-1 | NC_006361.1       | - | 54340   | 54212   | RNA →                                                                                                                                                                           |
| Str-1-1              | NZ_AATJ01000003.1 | - | 329719  | 329592  | RNA → hypo → CpaF (COG4962) → hypo → type II secretion system protein → hypo (cons) → hypo → hypo →                                                                             |
| Jsp-1-1              | NZ_AAMN01000001.1 | - | 855459  | 855340  | RNA → hypo → CpaF (COG4962) → hypo → hypo →                                                                                                                                     |
| Tfu-1-1              | NC_007333.1       | - | 153005  | 152904  | RNA → putative septum site determining protein → CpaF (COG4962) → TadB (COG4965) →                                                                                              |
| Ace-1-1              | NZ_AAOL01000002.1 | - | 345966  | 345854  | putative integral membrane protein → RNA → putative septum site determining protein → CpaF (COG4962) → TadB (COG4965) →                                                         |
| Rsp-1-1              | NC_008268.1       | + | 4571438 | 4571555 | putative integral membrane protein → RNA → hypo → CpaF (COG4962) → hypo → hypo → hypo → hypo → hypo →                                                                           |
| Nfa-1-2              | NC_006361.1       | + | 368533  | 368649  | RNA → hypo → CpaF (COG4962) → hypo → hypo → hypo →                                                                                                                              |
| Mtu-2-1              | NC_002755.2       | - | 4091740 | 4091621 | RNA → hypo →                                                                                                                                                                    |
| Mtu-4-1              | NC_000962.2       | - | 4099482 | 4099363 | RNA → hypo →                                                                                                                                                                    |
| Mtu-3-1              | NZ_AAIX01000046.1 | - | 4469    | 4350    | RNA → hypo → CpaF (COG4962) → TadB (COG4965) → COG2064: Flp pilus assembly protein TadC → hypo →                                                                                |
| Mtu-1-1              | NZ_AAKR01000113.1 | - | 5086    | 4967    | hypo → RNA → hypo → CpaF (COG4962) → TadB (COG4965) → COG2064: Flp pilus assembly protein TadC → hypo →                                                                         |
| Mbo-1-1              | NC_002945.3       | - | 4036829 | 4036709 | hypo → hypo → RNA → hypo →                                                                                                                                                      |
| Mav-1-1              | NC_002944.2       | + | 439643  | 439762  | RNA → hypo →                                                                                                                                                                    |
| Mfl-1-1              | NZ_AAPA01000025.1 | - | 2695    | 2578    | RNA → hypo (cons) → CpaF (COG4962) →                                                                                                                                            |
| Mva-1-1              | NZ_AAPF01000001.1 | + | 1361895 | 1362011 | RNA → COG0455 (COG0455) → CpaF (COG4962) →                                                                                                                                      |
| Msp-3-1              | NC_008146.1       | - | 5091214 | 5091098 | RNA → hypo → CpaF (COG4962) → TadB (COG4965) → type II secretion system protein → hypo →                                                                                        |
| Msp-2-1              | NZ_AAQD01000022.1 | + | 49134   | 49250   | RNA → hypo (cons) → CpaF (COG4962) → TadB (COG4965) → type II secretion system protein → hypo (cons) →                                                                          |
| Msp-1-1              | NZ_AAQC01000003.1 | - | 2777    | 2660    | RNA → hypo (cons) → CpaF (COG4962) →                                                                                                                                            |
| SCO-1-1              | NC_003888.3       | - | 3933621 | 3933505 | RNA → septum site determining protein → CpaF (COG4962) → integral membrane protein →                                                                                            |
| Sav-1-1              | NC_003155.3       | + | 5623199 | 5623315 | integral membrane protein → small membrane protein → hypo → membrane spanning protein → RNA → septum site determining protein → CpaF (COG4962) →                                |
| <sup>2</sup> Kra-1-1 | NZ_AAEF02000159.1 | + | 2080    | 2202    | RNA → CpaF (COG4962) →                                                                                                                                                          |
| Fal-1-1              | NC_008278.1       | + | 7144284 | 7144409 | RNA → ParA (cd02042) → CpaF (COG4962) → hypothetical protein; putative signal peptide → hypo → hypo →                                                                           |
| mac-1-1              | NZ_AA0B01000010.1 | + | 29188   | 29304   | hypothetical protein; putative TONB Box domain → RNA → CpaF (COG4962) → putative integral membrane protein →                                                                    |
| Cdi-1-1              | NC_002935.2       | + | 278513  | 278629  | RNA → Putative morphological differentiation-related protein → CpaF (COG4962) → TadB (COG4965) →                                                                                |
| Cgl-1-1              | NC_003450.3       | + | 314679  | 314804  | Putative secreted protein → hypo → Putative secreted protein → Putative secreted protein → RNA → hypo → CpaF (COG4962) → TadB (COG4965) → TadC (COG2064) → hypo → hypo → hypo → |
| Cgl-1-2              | NC_006958.1       | + | 314679  | 314804  | RNA → PUTATIVE SEPTUM SITE DETERMINING PROTEIN → CpaF (COG4962) → TadB (COG4965) →                                                                                              |
| <sup>3</sup> Cef-1-1 | NC_004369.1       | + | 322055  | 322178  | TadC (COG2064) → hypo → conserved secreted protein → conserved hypothetical secreted protein → RNA → hypo → CpaF (COG4962) → TadB (COG4965) → hypo →                            |

cd02042 ParA and ParB of *Caulobacter crescentus* belong to a conserved family of bacterial proteins implicated in chromosome segregation.  
 COG0455 ATPases involved in chromosome partitioning [Cell division and chromosome partitioning]  
 COG2064 Flp pilus assembly protein TadC [Cell motility and secretion / Intracellular

trafficking and secretion]  
 COG4962 Flp pilus assembly protein, ATPase CpaF [Intracellular trafficking and secretion]  
 COG4965 Flp pilus assembly protein TadB [Intracellular trafficking and secretion]

Duplicate sequences: the following putative homologs are not shown in the alignment because their sequences are identical to a homolog already shown: Cgl-1-2, Msp-2-1, Mtu-1-1, Mtu-3-1, Mtu-4-1





alignment positions 121 ... 152

```

NC_003450.3/314735-314797      .UA.AACU.....A.G.....U
NZ_AAQC01000003.1/2735-2653   AUU.CGCA.....A.U.CCG..GA.U
NC_008146.1/5091172-5091091   AUU.CGCA.....A.U.CCG..GA.U
NZ_LAAPF01000001.1/1361937-1362023
NC_002944.2/439692-439763     .GC.C.CGGCGGAU...AGA.U.C.A..GC.C
NC_002945.3/4036784-4036704   .CG.GGCU.....G.U.....U
NC_002755.2/4091695-4091616   .CA.CGCA.AACGU...C.G.U.C.A..GC.C
NC_008268.1/4571481-4571564   .CA.CGCA.AACGU...C.G.U.C.A..GC.C
NC_006361.1/368575-368653     .GC.CGCA...CU...CCU...C.G..GC.U
NZ_LAAEF02000159.1/2137-2194  .CG.GCCG.GUGAU...AUU.U.CCG..GC.U
NC_007333.1/152974-152903     .C...UCC...U...C...C.G..GU.C
NZ_AAAP01000025.1/2652-2552   .GG.AGCU...UU...C...CCG..GC.C
NC_004369.1/322103-322183     GAC.CUCU...U...A.G.U.C.G..G..U
NZ_AATJ01000003.1/329663-329595
CUCGUCCA...U...A.G.GGC.C..GC.U
NZ_AAMN01000001.1/855409-855344
.UG.U.....UG.U.C.G..GCC
NC_003155.3/5623246-5623327  .U...UCA.....G.G..UG..CC.G
NC_003888.3/3933574-3933495  CUCCUUCU...U...U.CAA.C.G..GU.U
NZ_AAOL01000002.1/345925-345853
.CG.CACU...U...CU.C.A.C.G..AU.C
NC_008278.1/7144335-7144418  .GC.CG.....G...C.G..A..U
NC_006361.1/54288-54199      .GG.UUCU...G...A.C.G.UCG..GC.U
NC_002935.2/278560-278648   .GG.CCCA...UCCGAGG.U.C.G..GC.C
                                .CC.CCCA..AAGU...AUC.C.U.GUAGC.U
                                .....>.>.>.>.>
                                .....2.2.2..?2.2
                                ●-●-●○-----○-----○-○-○-Y-G--RY-Y

```

## 2.12 alpha-transposase motif

### abbrev. of hits

Asp-1-1 to Asp-1-1  
 Bja-1-1 to Bja-1-15  
 Bsp-1-1 to Bsp-1-1  
 Rpa-1-1 to Rpa-1-8  
 Mlo-1-1 to Mlo-1-3  
 Atu-1-1 to Atu-1-2  
 Ret-1-1 to Ret-1-1  
 Rsp-1-1 to Rsp-1-3  
 Sme-1-1 to Sme-1-1  
 Sme-2-1 to Sme-2-1  
 Pde-1-1 to Pde-1-1  
 Rsp-2-1 to Rsp-2-11  
 Acr-1-1 to Acr-1-3  
 Rru-1-1 to Rru-1-4  
 Ssp-1-1 to Ssp-1-2  
 Ssp-2-1 to Ssp-2-25  
 Sal-1-1 to Sal-1-2  
 Bxe-1-1 to Bxe-1-6  
 Asp-2-1 to Asp-2-11  
 env-1

### taxonomy of species

α-proteobacteria Rhizobiales Aurantimonadaceae *Aurantimonas* sp. SI85-9A1  
 α-proteobacteria Rhizobiales Bradyrhizobiaceae *Bradyrhizobium japonicum* USDA 110  
 α-proteobacteria Rhizobiales Bradyrhizobiaceae *Bradyrhizobium* sp. BTAi1  
 α-proteobacteria Rhizobiales Bradyrhizobiaceae *Rhodopseudomonas palustris* BisB18  
 α-proteobacteria Rhizobiales Phyllobacteriaceae *Mesorhizobium loti* MAFF303099  
 α-proteobacteria Rhizobiales Rhizobiaceae Rhizobium/Agrobacterium group *Agrobacterium tumefaciens* str. C58  
 α-proteobacteria Rhizobiales Rhizobiaceae Rhizobium/Agrobacterium group *Rhizobium etli*  
 α-proteobacteria Rhizobiales Rhizobiaceae Rhizobium/Agrobacterium group *Rhizobium* sp. NGR234  
 α-proteobacteria Rhizobiales Rhizobiaceae Sinorhizobium/Ensifer group *Sinorhizobium medicae* WSM419  
 α-proteobacteria Rhizobiales Rhizobiaceae Sinorhizobium/Ensifer group *Sinorhizobium meliloti* 1021  
 α-proteobacteria Rhodobacterales Rhodobacteraceae *Paracoccus denitrificans* PD1222  
 α-proteobacteria Rhodobacterales Rhodobacteraceae *Rhodobacter sphaeroides* ATCC 17025  
 α-proteobacteria Rhodospirillales Acetobacteraceae *Acidiphilium cryptum* JF-5  
 α-proteobacteria Rhodospirillales Rhodospirillaceae *Rhodospirillum rubrum* ATCC 11170  
 α-proteobacteria Sphingomonadales Sphingomonadaceae *Sphingomonas* sp. KA1  
 α-proteobacteria Sphingomonadales Sphingomonadaceae *Sphingomonas* sp. SKA58  
 α-proteobacteria Sphingomonadales Sphingomonadaceae *Sphingopyxis alaskensis* RB2256  
 β-proteobacteria Burkholderiales Burkholderiaceae *Burkholderia xenovorans* LB400  
 β-proteobacteria Rhodocyclales Rhodocyclaceae *Azoarcus* sp. EbN1  
 environmental sample



| abbrev   | RefSeq accession  |   | 5' at   | 3' at   | genes                                                                                                                         |
|----------|-------------------|---|---------|---------|-------------------------------------------------------------------------------------------------------------------------------|
| Mlo-1-1  | NC_002678.2       | + | 4876744 | 4876821 | COG3293 (COG3293) → RNA → rve (pfam00665) →                                                                                   |
| Sme-2-1  | NC_003047.1       | - | 3397596 | 3397504 | ← rve (pfam00665) RNA → rve (pfam00665) →                                                                                     |
| Rsp-1-1  | NC_000914.1       | - | 383476  | 383381  | ← DdlA (COG1181) RNA → rve (pfam00665) →                                                                                      |
| Rsp-1-2  | NC_000914.1       | - | 282996  | 282901  | ← Y4nF RNA → rve (pfam00665) →                                                                                                |
| Rsp-1-3  | NC_000914.1       | - | 189705  | 189610  | ← Transposase_8 (pfam01527) RNA → rve (pfam00665) →                                                                           |
| Bja-1-1  | NC_004463.1       | + | 1870915 | 1871020 | Peptidase_C48 (pfam02902) → RNA → rve (pfam00665) →                                                                           |
| Bja-1-2  | NC_004463.1       | - | 5545647 | 5545542 | EFh (cd00051) → RNA → rve (pfam00665) →                                                                                       |
| Bja-1-3  | NC_004463.1       | - | 3893645 | 3893540 | Bug (pfam03401) → RNA → rve (pfam00665) →                                                                                     |
| Bja-1-4  | NC_004463.1       | - | 2157859 | 2157754 | ← hypo RNA → rve (pfam00665) →                                                                                                |
| Bja-1-5  | NC_004463.1       | - | 2056179 | 2056074 | ← hypo RNA → rve (pfam00665) →                                                                                                |
| Mlo-1-2  | NC_002678.2       | - | 5043561 | 5043457 | COG3039 (COG3039) → RNA → rve (pfam00665) →                                                                                   |
| Pde-1-1  | NZ_AAIT01000005.1 | - | 235363  | 235276  | hypo → RNA → rve (pfam00665) →                                                                                                |
| Asp-2-1  | NC_006513.1       | + | 437018  | 437094  | ← hypo RNA → ← IstB (pfam01695)                                                                                               |
| Asp-2-2  | NC_006513.1       | + | 3309135 | 3309211 | ← hypo RNA → ← IstB (pfam01695)                                                                                               |
| Asp-2-3  | NC_006513.1       | - | 4018059 | 4017983 | ← CypX (COG2124) RNA → ← IstB (pfam01695)                                                                                     |
| Asp-2-4  | NC_006513.1       | - | 3765238 | 3765162 | ← IstB (pfam01695) RNA → ← IstB (pfam01695)                                                                                   |
| Asp-2-5  | NC_006513.1       | - | 1952520 | 1952444 | ← hypo RNA → ← IstB (pfam01695)                                                                                               |
| Asp-2-6  | NC_006513.1       | - | 1189836 | 1189760 | COG4453 (COG4453) → RNA → ← IstB (pfam01695)                                                                                  |
| Asp-2-7  | NC_006513.1       | - | 225780  | 225704  | hypo → RNA → ← IstB (pfam01695)                                                                                               |
| Asp-2-8  | NC_006824.1       | + | 200486  | 200562  | Transposase_mut (pfam00872) → RNA → ← IstB (pfam01695)                                                                        |
| Asp-2-9  | NC_006824.1       | - | 158387  | 158311  | putative replication protein → RNA → ← IstB (pfam01695)                                                                       |
| Asp-2-10 | NC_006824.1       | - | 138080  | 138004  | ← Peptidase_S24 (pfam00717) RNA → ← IstB (pfam01695)                                                                          |
| Asp-2-11 | NC_006824.1       | - | 87887   | 87811   | ← HNHc (smart00507) RNA → ← IstB (pfam01695)                                                                                  |
| Atu-1-1  | NC_003063.1       | - | 28127   | 28054   | COG1708 (COG1708) HEPN (smart00748) → RNA → ← DnaC (COG1484)                                                                  |
| Atu-1-2  | NC_003305.1       | + | 2046630 | 2046703 | COG1708 (COG1708) HEPN (smart00748) → RNA → ← DnaC (COG1484)                                                                  |
| Acr-1-1  | NZ_AA0001000004.1 | - | 76651   | 76567   | ← hypo RNA → rve (pfam00665) →                                                                                                |
| Acr-1-2  | NZ_AA0001000001.1 | + | 286345  | 286429  | ← Transposase_2 (pfam01385) Transposase_35 (pfam07282) RNA → rve (pfam00665) →                                                |
| Acr-1-3  | NZ_AA0001000001.1 | - | 355999  | 355915  | ← COG4227 (COG4227) RNA → rve (pfam00665) →                                                                                   |
| Rru-1-1  | NC_007641.1       | + | 10421   | 10476   | ← Glycos.transf_1 (pfam00534) RgpF (pfam05045) RNA → putative fragment of transposase protein →                               |
| Rru-1-2  | NC_007641.1       | - | 15435   | 15380   | ← INT_FimBE_C (cd01197) RNA → putative fragment of transposase protein →                                                      |
| Ssp-2-1  | NZ_AAQG01000001.1 | + | 5195    | 5250    | tRNA-Met → RNA → Transposase_mut (pfam00872) →                                                                                |
| Ssp-2-2  | NZ_AAQG01000002.1 | + | 175125  | 175180  | HTH_LUXR (smart00421) → RNA → Transposase_mut (pfam00872) →                                                                   |
| Ssp-2-3  | NZ_AAQG01000003.1 | - | 41183   | 41128   | rve (pfam00665) → RNA → Transposase_mut (pfam00872) →                                                                         |
| Ssp-2-4  | NZ_AAQG01000004.1 | - | 26158   | 26103   | ← hypo RNA → Transposase_mut (pfam00872) →                                                                                    |
| Ssp-2-5  | NZ_AAQG01000004.1 | - | 15038   | 14983   | rve (pfam00665) → RNA → Transposase_mut (pfam00872) →                                                                         |
| Ssp-2-6  | NZ_AAQG01000013.1 | + | 24577   | 24632   | ← hypo RNA → Transposase_mut (pfam00872) →                                                                                    |
| Ssp-2-7  | NZ_AAQG01000013.1 | + | 51046   | 51101   | XynE_like (cd01830) → RNA → Transposase_mut (pfam00872) →                                                                     |
| Ssp-2-8  | NZ_AAQG01000014.1 | + | 63965   | 64020   | ← ligand_gated_channel (cd01347) RNA → Transposase_mut (pfam00872) →                                                          |
| Ssp-2-9  | NZ_AAQG01000018.1 | - | 11185   | 11130   | ISP <sub>sy20</sub> , transposase IstB, transcriptional regulator, LysR family - fusion → RNA → Transposase_mut (pfam00872) → |
| Ssp-2-10 | NZ_AAQG01000024.1 | - | 47296   | 47241   | ← Transposase_8 (pfam01527) RNA → Transposase_mut (pfam00872) →                                                               |
| Rru-1-3  | NC_007643.1       | - | 3348856 | 3348799 | Protein of unknown function DUF6, transmembrane → RNA → transposase →                                                         |
| Ssp-2-11 | NZ_AAQG01000001.1 | + | 5195    | 5285    | tRNA-Met → RNA → Transposase_mut (pfam00872) →                                                                                |

|          |                   |   |         |         |                                                                                                                  |
|----------|-------------------|---|---------|---------|------------------------------------------------------------------------------------------------------------------|
| Ssp-2-12 | NZ_AAQG01000002.1 | + | 175125  | 175215  | HTH_LUXR (smart00421) → RNA → Transposase_mut (pfam00872) →                                                      |
| Ssp-2-13 | NZ_AAQG01000003.1 | - | 41183   | 41093   | rve (pfam00665) → RNA → Transposase_mut (pfam00872) →                                                            |
| Ssp-2-14 | NZ_AAQG01000004.1 | - | 26158   | 26068   | ← hypo RNA → Transposase_mut (pfam00872) →                                                                       |
| Ssp-2-15 | NZ_AAQG01000004.1 | - | 15038   | 14948   | rve (pfam00665) → RNA → Transposase_mut (pfam00872) →                                                            |
| Ssp-2-16 | NZ_AAQG01000013.1 | + | 24577   | 24667   | ← hypo RNA → Transposase_mut (pfam00872) →                                                                       |
| Ssp-2-17 | NZ_AAQG01000013.1 | + | 51046   | 51136   | XynE_like (cd01830) → RNA → Transposase_mut (pfam00872) →                                                        |
| Ssp-2-18 | NZ_AAQG01000014.1 | + | 63965   | 64055   | ← ligand_gated_channel (cd01347) RNA → Transposase_mut (pfam00872) →                                             |
| Ssp-2-19 | NZ_AAQG01000018.1 | - | 11185   | 11095   | ISPsy20, transposase IstB, transcriptional regulator, LysR family - fusion → RNA → Transposase_mut (pfam00872) → |
| Ssp-2-20 | NZ_AAQG01000024.1 | - | 47296   | 47206   | ← Transposase_8 (pfam01527) RNA → Transposase_mut (pfam00872) →                                                  |
| Sal-1-1  | NC_008048.1       | + | 440766  | 440859  | hypo → RNA → ← IstB (pfam01695)                                                                                  |
| Sal-1-2  | NC_008048.1       | + | 856443  | 856536  | ← hypo RNA → ← IstB (pfam01695)                                                                                  |
| Asp-1-1  | NZ_AAPJ01000001.1 | - | 626620  | 626533  | Transposase_25 (pfam03050) → RNA → transposase →                                                                 |
| Rsp-2-1  | NZ_AAME01000001.1 | + | 167776  | 167872  | ← HipA (COG3550) RNA → rve (pfam00665) →                                                                         |
| Bja-1-6  | NC_004463.1       | + | 1764755 | 1764848 | hypo → RNA → ← rve (pfam00665)                                                                                   |
| Bja-1-7  | NC_004463.1       | + | 2293017 | 2293110 | hypo → RNA → ← rve (pfam00665)                                                                                   |
| Bja-1-8  | NC_004463.1       | + | 8330281 | 8330374 | PorG (COG1014) COG4231 (COG4231) → RNA → ← rve (pfam00665)                                                       |
| Bja-1-9  | NC_004463.1       | - | 9051687 | 9051594 | ← hypo RNA → ← rve (pfam00665)                                                                                   |
| Bja-1-10 | NC_004463.1       | - | 9028428 | 9028335 | hypo → RNA → ← rve (pfam00665)                                                                                   |
| Bja-1-11 | NC_004463.1       | - | 2081222 | 2081129 | Metallophos (pfam00149) → RNA → ← rve (pfam00665)                                                                |
| Bja-1-12 | NC_004463.1       | - | 1898433 | 1898340 | ← HypF (COG0068)AcyP (COG1254)HupF_HypC (pfam01455) RNA → ← rve (pfam00665)                                      |
| Bja-1-13 | NC_004463.1       | - | 15937   | 15844   | ← hypo RNA → ← rve (pfam00665)                                                                                   |
| Bja-1-14 | NC_004463.1       | - | 9016772 | 9016679 | ← rve (pfam00665) RNA → ← putative transposase                                                                   |
| Bja-1-15 | NC_004463.1       | + | 1906118 | 1906211 | COG3415 (COG3415)rve (pfam00665) → RNA → ← rve (pfam00665)                                                       |
| Mlo-1-3  | NC_002678.2       | - | 5052265 | 5052159 | COG4977 (COG4977) → RNA → rve (pfam00665) →                                                                      |
| Ssp-2-21 | NZ_AAQG01000001.1 | - | 251931  | 251822  | Ku protein → RNA → rve (pfam00665) →                                                                             |
| Bsp-1-1  | NZ_AALJ01000035.1 | + | 4382    | 4484    | ← IstB (pfam01695) RNA → ← IstB (pfam01695)                                                                      |
| Ssp-2-22 | NZ_AAQG01000001.1 | - | 420998  | 420915  | ← hypo RNA → ← rve (pfam00665)                                                                                   |
| Ssp-2-23 | NZ_AAQG01000014.1 | + | 25932   | 26015   | COG2944 (COG2944) → RNA → ← rve (pfam00665)                                                                      |
| Ssp-2-24 | NZ_AAQG01000015.1 | - | 955     | 872     | Glyoxalase (pfam00903) → RNA → ← DnaC (COG1484)                                                                  |
| Ssp-1-1  | NC_008308.1       | + | 248587  | 248694  | hypo → RNA → ← IstB (pfam01695)                                                                                  |
| Ssp-2-25 | NZ_AAQG01000015.1 | - | 955     | 850     | Glyoxalase (pfam00903) → RNA → ← DnaC (COG1484)                                                                  |
| Rsp-2-2  | NZ_AAME01000006.1 | - | 78528   | 78426   | ← rve (pfam00665) RNA → rve (pfam00665) →                                                                        |
| Rsp-2-3  | NZ_AAME01000046.1 | + | 29195   | 29297   | ← tISRso9, RSp0584; ISRSO9-transposase protein RNA → rve (pfam00665) →                                           |
| Rsp-2-4  | NZ_AAME01000056.1 | + | 17471   | 17573   | IstB (pfam01695) → RNA →                                                                                         |
| Rsp-2-5  | NZ_AAME01000059.1 | + | 15569   | 15671   | rve (pfam00665) → RNA → putative transposase →                                                                   |
| Rsp-2-6  | NZ_AAME01000065.1 | + | 9439    | 9541    | hypo → RNA → putative transposase →                                                                              |
| Rpa-1-1  | NC_007925.1       | + | 654127  | 654230  | hypo → RNA → rve (pfam00665) →                                                                                   |
| Rpa-1-2  | NC_007925.1       | + | 5001678 | 5001781 | ← COG3513 (COG3513) RNA → rve (pfam00665) →                                                                      |
| Rpa-1-3  | NC_007925.1       | - | 3393798 | 3393695 | INT_P4 (cd00801) → RNA → rve (pfam00665) →                                                                       |
| Rpa-1-4  | NC_007925.1       | - | 1102506 | 1102403 | hypo → RNA → rve (pfam00665) →                                                                                   |
| Rpa-1-5  | NZ_AALR01000013.1 | + | 167077  | 167180  | ← COG3513 (COG3513) RNA →                                                                                        |
| Rpa-1-6  | NZ_AALR01000014.1 | + | 133089  | 133192  | similar to Phosphoenolpyruvate carboxykinase (ATP) → RNA → rve (pfam00665) →                                     |
| Rpa-1-7  | NZ_AALR01000021.1 | + | 101592  | 101695  | hypo → RNA →                                                                                                     |

|          |                    |   |         |         |                                                                                       |
|----------|--------------------|---|---------|---------|---------------------------------------------------------------------------------------|
| Rpa-1-8  | NZ_AALR01000042.1  | + | 13218   | 13321   | <b>INT_P4 (cd00801)</b> → RNA → putative transposase →                                |
| Rru-1-4  | NC_007643.1        | + | 2540975 | 2541078 | ← <b>COG4231 (COG4231)</b> <b>PorG (COG1014)</b> RNA → putative transposase →         |
| env-1    | AACY01005623.1     | + | 200     | 301     | RNA → ← unknown                                                                       |
| Ret-1-1  | NC_004041.2        | - | 53080   | 52973   | hypo → RNA → <b>rve (pfam00665)</b> →                                                 |
| Ssp-1-2  | NC_008308.1        | - | 254516  | 254419  | hypo → RNA → ← <b>DnaC (COG1484)</b>                                                  |
| Bxe-1-1  | NC_007952.1        | - | 3240751 | 3240655 | <b>AtoS (COG2202)</b> → RNA → <b>rve (pfam00665)</b> →                                |
| Bxe-1-2  | NC_007951.1        | + | 794210  | 794306  | hypo → RNA → <b>rve (pfam00665)</b> →                                                 |
| Bxe-1-3  | NC_007951.1        | + | 2105927 | 2106023 | <b>UvrD-helicase (pfam00580)</b> → RNA → <b>rve (pfam00665)</b> →                     |
| Bxe-1-4  | NC_007951.1        | + | 2219944 | 2220040 | <b>rve (pfam00665)</b> → RNA → <b>rve (pfam00665)</b> →                               |
| Bxe-1-5  | NC_007951.1        | - | 1953011 | 1952915 | <b>Transposase_9 (pfam01548)</b> → RNA → <b>rve (pfam00665)</b> →                     |
| Bxe-1-6  | NC_007951.1        | - | 1434502 | 1434406 | <b>Transposase_25 (pfam03050)</b> → RNA → <b>rve (pfam00665)</b> →                    |
| Sme-1-1  | NZ_AATG01000011.1  | + | 110837  | 110931  | ← <b>COG1936 (COG1936)</b> RNA → ← <b>IstB</b>                                        |
| Rsp-2-7  | NZ_AAAME01000006.1 | + | 75965   | 76099   | <b>tRNA_anti (pfam01336)</b> → RNA → ← <b>IstB (pfam01695)</b>                        |
| Rsp-2-8  | NZ_AAAME01000009.1 | + | 96960   | 97094   | <b>ISGsu6, transposase OrfB</b> → RNA → ← similar to DNA replication protein          |
| Rsp-2-9  | NZ_AAAME01000018.1 | + | 87461   | 87595   | <b>tISRso9, RSp0584; ISRSO9-transposase protein</b> → RNA → ← <b>IstB (pfam01695)</b> |
| Rsp-2-10 | NZ_AAAME01000042.1 | + | 34094   | 34228   | ← <b>COG4584 (COG4584)</b> RNA → ← <b>IstB (pfam01695)</b>                            |
| Rsp-2-11 | NZ_AAAME01000057.1 | + | 16250   | 16384   | ← <b>Adk (COG0563)</b> RNA → ← <b>IstB (pfam01695)</b>                                |

**cd00051** EF-hand, calcium binding motif; A diverse superfamily of calcium sensors and calcium signal modulators; most examples in this alignment model have 2 active canonical EF hands.

**cd00801** Bacteriophage P4 integrase.

**cd01197** FimB and FimE and related proteins, DNA breaking-rejoining enzymes, integrase/recombinases, catalytic domain.

**cd01347** TonB dependent/Ligand-Gated channels are created by a monomeric 22 strand (22,24) anti-parallel beta-barrel.

**cd01830** SGNH\_hydrolase subfamily, similar to the putative arylesterase/acylhydrolase from the rumen anaerobe *Prevotella bryantii* XynE.

**COG0068** Hydrogenase maturation factor [Posttranslational modification, protein turnover, chaperones]

**COG0563** Adenylate kinase and related kinases [Nucleotide transport and metabolism]

**COG1014** Pyruvate:ferredoxin oxidoreductase and related 2-oxoacid:ferredoxin oxidoreductases, gamma subunit [Energy production and conversion]

**COG1181** D-alanine-D-alanine ligase and related ATP-grasp enzymes [Cell envelope biogenesis, outer membrane]

**COG1254** Acylphosphatases [Energy production and conversion]

**COG1484** DNA replication protein [DNA replication, recombination, and repair]

**COG1708** Predicted nucleotidyltransferases [General function prediction only]

**COG1936** Predicted nucleotide kinase (related to CMP and AMP kinases) [Nucleotide transport and metabolism]

**COG2124** Cytochrome P450 [Secondary metabolites biosynthesis, transport, and

catabolism]

**COG2202** FOG: PAS/PAC domain [Signal transduction mechanisms]

**COG2944** Predicted transcriptional regulator [Transcription]

**COG3039** Transposase and inactivated derivatives, IS5 family [DNA replication, recombination, and repair]

**COG3293** Transposase and inactivated derivatives [DNA replication, recombination, and repair]

**COG3415** Transposase and inactivated derivatives [DNA replication, recombination, and repair]

**COG3518** Uncharacterized protein conserved in bacteria [Function unknown]

**COG3550** Uncharacterized protein related to capsule biosynthesis enzymes [General function prediction only]

**COG4227** Antirestriction protein [DNA replication, recombination, and repair]

**COG4231** Indolepyruvate ferredoxin oxidoreductase, alpha and beta subunits [Energy production and conversion]

**COG4453** Uncharacterized protein conserved in bacteria [Function unknown]

**COG4584** Transposase and inactivated derivatives [DNA replication, recombination, and repair]

**COG4977** Transcriptional regulator containing an amidase domain and an AraC-type DNA-binding HTH domain [Transcription]

**pfam00149** Calcineurin-like phosphoesterase.

**pfam00534** Glycosyl transferases group 1.

**pfam00580** UvrD/REP helicase.

**pfam00665** Integrase core domain.





```

Sme-1-1  .....GCG
Rsp-2-7  ...U.GGCGC
          ...G.G.GG...
          ...G.G.GG...
          ---o-o●●Y

```

## 2.13 excisionase motif

### 2.13.1 Possible misannotation of excisionase genes

We note that the excisionase genes associated with this motif are often annotated merely as unknown DNA-binding proteins, and we can find only one gene (a putative prophage regulatory gene) nearby to Xis that

relates to phages. Therefore the excisionases could be misclassified, and may encode some other type of DNA-binding protein.

### 2.13.2 Genome context and alignment

Notes:

<sup>1</sup> Downstream gene is annotated as overlapping RNA. The overlapping region is only found in one other excisionase, despite several excisionases with homology detectable by BLAST. (BLAST therefore implies that this gene is also an excisionase.) Moreover, the indicate start codon is consistent with the sequence motifs in the other sequences.

<sup>2</sup> Downstream gene is annotated as overlapping RNA. However, BLAST suggests that the overlap region is not conserved, and therefore may be an overprediction. The start codon we selected has a consistent

placement with those of the other sequences.

<sup>3</sup> The homology for this hit is unconvincing, but plausible. Gene context is highly consistent, but some conserved features are broken. This hit was found in a search of UTRs of Actinobacterial excisionases found by PSIBLAST, and the CM estimated an E-value of above 1 even in this small database.

<sup>4</sup> Annotated start is the GUG nine nucleotides upstream of the putative start codon we have selected. Our candidate start codon is more consistent with those of other similar sequences.

**abbrev. of hits**

**taxonomy of species**

|                    |                                                                                                                                                   |
|--------------------|---------------------------------------------------------------------------------------------------------------------------------------------------|
| Cdi-1-1 to Cdi-1-1 | Actinobacteria Actinobacteridae Actinomycetales Corynebacterineae Corynebacteriaceae <i>Corynebacterium diphtheriae</i> NCTC 13129                |
| Cef-1-1 to Cef-1-1 | Actinobacteria Actinobacteridae Actinomycetales Corynebacterineae Corynebacteriaceae <i>Corynebacterium efficiens</i> YS-314                      |
| Cgl-1-1 to Cgl-1-2 | Actinobacteria Actinobacteridae Actinomycetales Corynebacterineae Corynebacteriaceae <i>Corynebacterium glutamicum</i> ATCC 13032                 |
| Cje-1-1 to Cje-1-1 | Actinobacteria Actinobacteridae Actinomycetales Corynebacterineae Corynebacteriaceae <i>Corynebacterium jeikeium</i> K411                         |
| Mfl-1-1 to Mfl-1-1 | Actinobacteria Actinobacteridae Actinomycetales Corynebacterineae Mycobacteriaceae <i>Mycobacterium flavescens</i> PYR-GCK                        |
| Mle-1-1 to Mle-1-1 | Actinobacteria Actinobacteridae Actinomycetales Corynebacterineae Mycobacteriaceae <i>Mycobacterium leprae</i> TN                                 |
| Msp-1-1 to Msp-1-1 | Actinobacteria Actinobacteridae Actinomycetales Corynebacterineae Mycobacteriaceae <i>Mycobacterium</i> sp. JLS                                   |
| Msp-2-1 to Msp-2-1 | Actinobacteria Actinobacteridae Actinomycetales Corynebacterineae Mycobacteriaceae <i>Mycobacterium</i> sp. KMS                                   |
| Msp-3-1 to Msp-3-1 | Actinobacteria Actinobacteridae Actinomycetales Corynebacterineae Mycobacteriaceae <i>Mycobacterium</i> sp. MCS                                   |
| Mva-1-1 to Mva-1-1 | Actinobacteria Actinobacteridae Actinomycetales Corynebacterineae Mycobacteriaceae <i>Mycobacterium vanbaalenii</i> PYR-1                         |
| Mav-1-1 to Mav-1-1 | Actinobacteria Actinobacteridae Actinomycetales Corynebacterineae Mycobacteriaceae <i>Mycobacterium avium</i> subsp. <i>paratuberculosis</i> K-10 |
| Mbo-1-1 to Mbo-1-1 | Actinobacteria Actinobacteridae Actinomycetales Corynebacterineae Mycobacteriaceae <i>Mycobacterium bovis</i> AF2122/97                           |
| Mtu-1-1 to Mtu-1-1 | Actinobacteria Actinobacteridae Actinomycetales Corynebacterineae Mycobacteriaceae <i>Mycobacterium tuberculosis</i> C                            |
| Mtu-2-1 to Mtu-2-1 | Actinobacteria Actinobacteridae Actinomycetales Corynebacterineae Mycobacteriaceae <i>Mycobacterium tuberculosis</i> CDC1551                      |
| Mtu-3-1 to Mtu-3-1 | Actinobacteria Actinobacteridae Actinomycetales Corynebacterineae Mycobacteriaceae <i>Mycobacterium tuberculosis</i> F11                          |
| Mtu-4-1 to Mtu-4-1 | Actinobacteria Actinobacteridae Actinomycetales Corynebacterineae Mycobacteriaceae <i>Mycobacterium tuberculosis</i> H37Rv                        |
| Nfa-1-1 to Nfa-1-1 | Actinobacteria Actinobacteridae Actinomycetales Corynebacterineae Nocardiaceae <i>Nocardia farcinica</i> IFM 10152                                |
| Rsp-1-1 to Rsp-1-1 | Actinobacteria Actinobacteridae Actinomycetales Corynebacterineae Nocardiaceae <i>Rhodococcus</i> sp. RHA1                                        |
| Ace-1-1 to Ace-1-2 | Actinobacteria Actinobacteridae Actinomycetales Frankineae Acidothermaceae <i>Acidothermus cellulolyticus</i> 11B                                 |
| Kra-1-1 to Kra-1-1 | Actinobacteria Actinobacteridae Actinomycetales Frankineae Kineosporiaceae <i>Kineococcus radiotolerans</i> SRS30216                              |
| Jsp-1-1 to Jsp-1-1 | Actinobacteria Actinobacteridae Actinomycetales Micrococccineae Intrasporangiaceae <i>Janibacter</i> sp. HTCC2649                                 |
| Str-1-1 to Str-1-1 | Actinobacteria Actinobacteridae Actinomycetales Micromonosporineae Micromonosporaceae <i>Salinispora tropica</i> CNB-440                          |
| Nsp-1-1 to Nsp-1-1 | Actinobacteria Actinobacteridae Actinomycetales Propionibacterineae Nocardioidaceae <i>Nocardioides</i> sp. JS614                                 |
| Sav-1-1 to Sav-1-1 | Actinobacteria Actinobacteridae Actinomycetales Streptomycineae Streptomycetaceae <i>Streptomyces avermitilis</i> MA-4680                         |
| Sco-1-1 to Sco-1-1 | Actinobacteria Actinobacteridae Actinomycetales Streptomycineae Streptomycetaceae <i>Streptomyces coelicolor</i> A3(2)                            |

| abbrev               | RefSeq accession  |   | 5' at   | 3' at   | genes                                                                                |
|----------------------|-------------------|---|---------|---------|--------------------------------------------------------------------------------------|
| Cgl-1-1              | NC_003450.3       | + | 435866  | 435954  | RNA → hypo →                                                                         |
| Cgl-1-2              | NC_006958.1       | + | 435865  | 435953  | RNA → hypo → extremely conserved POSSIBLE DNA-BINDING PROTEIN →                      |
| <sup>4</sup> Cef-1-1 | NC_004369.1       | + | 467815  | 467903  | RNA → hypo →                                                                         |
| Cdi-1-1              | NC_002935.2       | + | 361856  | 361943  | RNA → Putative DNA-binding (excisionase) protein → hypo → DsbA_Com1_like (cd03023) → |
| Nfa-1-1              | NC_006361.1       | - | 5475483 | 5475397 | RNA → hypo →                                                                         |
| Rsp-1-1              | NC_008268.1       | - | 2173234 | 2173148 | RNA → possible excisionase →                                                         |
| Mav-1-1              | NC_002944.2       | + | 4449736 | 4449823 | RNA → hypo →                                                                         |
| Mtu-2-1              | NC_002755.2       | + | 592395  | 592484  | RNA → excisionase, putative →                                                        |
| Mtu-4-1              | NC_000962.2       | + | 591027  | 591116  | RNA → hypo →                                                                         |
| Mbo-1-1              | NC_002945.3       | + | 592178  | 592267  | RNA → hypo →                                                                         |
| Mtu-3-1              | NZ_AAIX01000005.1 | + | 131569  | 131658  | RNA → COG1910: Periplasmic molybdate-binding protein/domain →                        |
| Mtu-1-1              | NZ_AAKR01000010.1 | + | 721     | 810     | RNA → COG1910: Periplasmic molybdate-binding protein/domain →                        |
| Mle-1-1              | NC_002677.1       | - | 2905434 | 2905344 | RNA → possible DNA-binding protein →                                                 |
| Mva-1-1              | NZ_AAPF01000001.1 | + | 930429  | 930517  | RNA → Excisionase/Xis, DNA-binding →                                                 |
| Mfl-1-1              | NZ_AAPA01000002.1 | - | 278262  | 278176  | RNA → Excisionase/Xis, DNA-binding →                                                 |
| Msp-3-1              | NC_008146.1       | + | 729011  | 729098  | RNA → Excisionase/Xis, DNA-binding protein →                                         |
| Msp-1-1              | NZ_AAQC01000005.1 | - | 449098  | 449011  | RNA → Excisionase/Xis, DNA-binding →                                                 |
| Msp-2-1              | NZ_AAQD01000006.1 | + | 17383   | 17470   | RNA → Excisionase/Xis, DNA-binding →                                                 |
| Cje-1-1              | NC_007164.1       | - | 2221287 | 2221196 | RNA → hypo →                                                                         |
| Sco-1-1              | NC_003888.3       | - | 3680342 | 3680263 | RNA → hypo →                                                                         |
| <sup>2</sup> Sav-1-1 | NC_003155.3       | + | 5769564 | 5769643 | RNA → hypo →                                                                         |
| Nsp-1-1              | NZ_AAJB01000035.1 | + | 44622   | 44705   | RNA → Phage_Alpa (pfam05930) →                                                       |
| Str-1-1              | NZ_AATJ01000007.1 | + | 1327    | 1402    | RNA → Uncharacterized membrane-associated protein-like → GlcD (COG0277) →            |
| <sup>1</sup> Jsp-1-1 | NZ_AAMN01000001.1 | - | 762516  | 762442  | RNA → hypo → 111                                                                     |
| Ace-1-1              | NZ_AAOL01000004.1 | + | 111543  | 111630  | RNA → Excisionase/Xis, DNA-binding →                                                 |
| <sup>3</sup> Kra-1-1 | NZ_AAEF02000084.1 | - | 4439    | 4349    | RNA → Excisionase/Xis, DNA-binding →                                                 |
| <sup>3</sup> Ace-1-2 | NZ_AAOL01000002.1 | - | 432049  | 431961  | RNA → HTH_MlrA (cd01104) →                                                           |





Notes:

- <sup>1</sup> No start codon was annotated in this region. However, this sequence is highly similar to another sequence with an annotated start codon; we therefore used the same start codon.
- <sup>2</sup> This sequence fragment is cut off before the AUG start codon, by analogy with other highly similar sequences.
- <sup>3</sup> The two indicated RNAs in strains of *Prochlorococcus marinus* have annotated start codons that are likely to be 5' of the real start. First, one is 28 codons longer than the other, and second the extra coding region in both annotations is not conserved in any other bacteria. Finally, sequence conservation after (but not before) the common start codon we have selected is very high, and most mutations are in the wobble position. We therefore think our indicated start codon is the likely true start codon.
- <sup>4</sup> This RNA overlaps an annotated gene (not shown here) running in the reverse direction. However, this putative gene is only 36 amino acids and BLAST indicates that it is not conserved in any bacteria.
- <sup>5</sup> These sequences come from the Global Ocean Survey [12], and were downloaded from the CAMERA site at <http://camera.calit2.net/> related to CAMERA identifier CAM\_PUB\_Rusch07a. We estimated the start codon based on homology with other sequences.
- <sup>6</sup> This genetic information downloaded from <http://camera.calit2.net> may be considered to be part of the genetic patrimony of the country from which the sample was obtained. Users of this information agree to: (1) acknowledge the country of origin in any publications where the genetic information is presented and (2) contact the CBD focal point identified on the CBD website (<http://www.biodiv.org/doc/info-centre.shtml>) if they intend to use the genetic information for commercial purposes.
- <sup>7</sup> This sequence is derived from Open Ocean samples obtained from Sargasso Sea, Hydrostation S, Bermuda (UK)
- <sup>8</sup> This sequence is derived from Coastal samples obtained from Northeast of Colón, Panama
- <sup>9</sup> This sequence is derived from Coastal samples obtained from Gulf of Panama, Panama
- <sup>10</sup> This sequence is derived from Open Ocean samples obtained from 30 miles from Cocos Island, Costa Rica
- <sup>11</sup> This sequence is derived from Open Ocean samples obtained from Yucatan Channel, Mexico
- <sup>12</sup> This sequence is derived from Open Ocean samples obtained from Sargasso Sea, Station 13, Bermuda (UK)
- <sup>13</sup> This sequence is derived from Open Ocean samples obtained from 134 miles NE of Galápagos, Ecuador
- <sup>14</sup> This sequence is derived from Coastal samples obtained from North James Bay, Santiago Island, Ecuador
- <sup>15</sup> This sequence is derived from Open Ocean samples obtained from 250 miles from Panama City, Panama
- <sup>16</sup> This sequence is derived from Fringing Reef samples obtained from Dirty Rock, Cocos Island, Costa Rica
- <sup>17</sup> This sequence is derived from Coral Reef Atoll samples obtained from Rangirora Atoll, Fr. Polynesia
- <sup>18</sup> This sequence is derived from Open Ocean samples obtained from Sargasso Sea, Station 11, Bermuda (UK)
- <sup>19</sup> This sequence is derived from Hypersaline samples obtained from Punta Cormorant, Hypersaline Lagoon, Floreana Island, Ecuador
- <sup>20</sup> This sequence is derived from Coastal Sea samples obtained from Gulf of Mexico, USA

- <sup>21</sup> This sequence is derived from Coastal samples obtained from Off Key West, FL, USA
- <sup>22</sup> This sequence is derived from Coastal samples obtained from Devil's Crown, Floreana Island, Ecuador
- <sup>23</sup> This sequence is derived from Coastal samples obtained from Coastal Floreana, Ecuador
- <sup>24</sup> This sequence is derived from Coastal samples obtained from North Seamore Island, Ecuador
- <sup>25</sup> This sequence is derived from Open Ocean samples obtained from Rosario Bank, Honduras
- <sup>26</sup> This sequence is derived from Open Ocean samples obtained from 201 miles from F. Polynesia, International

### abbrev. of hits

Ssp-1-1 to Ssp-1-1  
 Ssp-2-1 to Ssp-2-1  
 Ssp-3-1 to Ssp-3-1  
 Ssp-4-1 to Ssp-4-1  
 Ssp-5-1 to Ssp-5-1  
 Ssp-6-1 to Ssp-6-1  
 Ssp-7-1 to Ssp-7-1  
 Pma-1-1 to Pma-1-1  
 Pma-2-1 to Pma-2-1  
 Pma-3-1 to Pma-3-1  
 Pma-4-1 to Pma-4-1  
 Pma-5-1 to Pma-5-1  
 Pma-6-1 to Pma-6-1  
 env-1 to env-87

### taxonomy of species

Cyanobacteria Chroococcales *Synechococcus* sp. CC9311  
 Cyanobacteria Chroococcales *Synechococcus* sp. CC9605  
 Cyanobacteria Chroococcales *Synechococcus* sp. CC9902  
 Cyanobacteria Chroococcales *Synechococcus* sp. RS9917  
 Cyanobacteria Chroococcales *Synechococcus* sp. WH 5701  
 Cyanobacteria Chroococcales *Synechococcus* sp. WH 7805  
 Cyanobacteria Chroococcales *Synechococcus* sp. WH 8102  
 Cyanobacteria Prochlorales Prochlorococcaceae *Prochlorococcus marinus* str. MIT 9211  
 Cyanobacteria Prochlorales Prochlorococcaceae *Prochlorococcus marinus* str. MIT 9312  
 Cyanobacteria Prochlorales Prochlorococcaceae *Prochlorococcus marinus* str. MIT 9313  
 Cyanobacteria Prochlorales Prochlorococcaceae *Prochlorococcus marinus* str. NATL2A  
 Cyanobacteria Prochlorales Prochlorococcaceae *Prochlorococcus marinus* subsp. *marinus* str. CCMP1375  
 Cyanobacteria Prochlorales Prochlorococcaceae *Prochlorococcus marinus* subsp. *pastoris* str. CCMP1986  
 environmental samples

| abbrev  | RefSeq accession  |   | 5' at   | 3' at   | genes                                                                                                                                                                                                                                                                                                                                                                        |
|---------|-------------------|---|---------|---------|------------------------------------------------------------------------------------------------------------------------------------------------------------------------------------------------------------------------------------------------------------------------------------------------------------------------------------------------------------------------------|
| Ssp-4-1 | NZ_AANP01000006.1 | + | 228716  | 228901  | ATP synthase subunit A → ATP-synt_A (pfam00119) → RNA → AtpE (COG0636) → ATP-synt_B (pfam00430) → AtpF (COG0711) → OSCP (pfam00213) → AtpA (COG0056) → ATP-synt (pfam00231) → possible ATP synthase protein 1 → ATP-synt_A (pfam00119) → RNA → AtpE (COG0636) → ATP-synt_B (pfam00430) → ATP-synt_B (pfam00430) → OSCP (pfam00213) → AtpA (COG0056) → ATP-synt (pfam00231) → |
| Ssp-6-1 | NZ_AAOK01000001.1 | + | 272018  | 272205  | possible ATP synthase protein 1 → ATP-synt_A (pfam00119) → RNA → AtpE (COG0636) → ATP-synt_B (pfam00430) → ATP-synt_B (pfam00430) → OSCP (pfam00213) → AtpA (COG0056) → ATP-synt (pfam00231) →                                                                                                                                                                               |
| Ssp-3-1 | NC_007513.1       | + | 500648  | 500850  | possible ATP synthase protein 1 → ATP-synt_A (pfam00119) → RNA → AtpE (COG0636) → ATP-synt_B (pfam00430) → ATP-synt_B (pfam00430) → OSCP (pfam00213) → AtpA (COG0056) → ATP-synt (pfam00231) → hypo → fer2 (cd00207) → hypo → hypo → COG3012 (COG3012) →                                                                                                                     |
| Ssp-7-1 | NC_005070.1       | + | 491082  | 491284  | possible ATP synthase protein 1 → ATP-synt_A (pfam00119) → RNA → AtpE (COG0636) → ATP-synt_B (pfam00430) → ATP-synt_B (pfam00430) → OSCP (pfam00213) → AtpA (COG0056) → ATP-synt (pfam00231) → hypo → fer2 (cd00207) → hypo → hypo → COG3012 (COG3012) →                                                                                                                     |
| Ssp-2-1 | NC_007516.1       | - | 2006437 | 2006235 | possible ATP synthase protein 1 → ATP-synt_A (pfam00119) → RNA → AtpE (COG0636) → ATP-synt_B (pfam00430) → ATP synthase subunit B → OSCP (pfam00213) → AtpA (COG0056) → ATP-synt (pfam00231) → hypo → fer2 (cd00207) → hypo → hypo → COG3012 (COG3012) →                                                                                                                     |
| Ssp-1-1 | NC_008319.1       | - | 2030819 | 2030612 | possible ATP synthase protein 1 → ATP-synt_A (pfam00119) → RNA → AtpE (COG0636) → ATP-synt_B (pfam00430) → ATP-synt_B (pfam00430) → OSCP (pfam00213) → AtpA (COG0056) → ATP-synt (pfam00231) → hypo → fer2 (cd00207) → hypo → Uncharacterized membrane protein → COG3012 (COG3012) →                                                                                         |









```

5,6,13 env-56 UUCAAAAU..... AUGGAUUCGAUUAUUCCCGUGCAUCAGUUGUAGCUGCUGGUUUAGCA
5,6,10 env-57 UUCAAAAU..... AUGGAUUCGAUUAUUCCCGUGCAUCAGUUGUAGCUGCUGGUUUAGCA
1 env-58 UUCAAAAU..... AUGGAUUCGAUUAUUCCCGUGCAUCAGUUGUAGCUGCUGGUUUAGCA
Pma-2-1 UUCAAAAU..... AUGGAUUCGAUUAUUCCCGUGCAUCAGUUGUAGCUGCUGGUUUAGCA
5,6,13 env-59 UUCAAAAU..... AUGGAUUCGAUUAUUCCCGUGCAUCAGUUGUAGCUGCUGGUUUAGCA
5,6,18 env-60 UUCAAAAU..... AUGGAUUCGAUUAUUCCCGUGCAUCAGUUGUAGCUGCUGGUUUAGCA
5,20 env-61 UUCAAAAU..... AUGGAUUCGAUUAUUCCCGUGCAUCAGUUGUAGCUGCUGGUUUAGCA
5,6,12 env-62 UUCAAAAU..... AUGGAUUCGAUUAUUCCCGUGCAUCAGUUGUAGCUGCUGGUUUAGCA
1 env-63 UUCAAAAU..... AUGGAUUCGAUUAUUCCCGUGCAUCAGUUGUAGCUGCUGGUUUAGCA
5,6,12 env-64 UUCAAAAU..... AUGGAUUCGAUUAUUCCCGUGCAUCAGUUGUAGCUGCUGGUUUAGCA
5,21 env-65 UUCAAAAU..... AUGGAUUCGAUUAUUCCCGUGCAUCAGUUGUAGCUGCUGGUUUAGCA
5,6,13 env-66 UUCAAAAU..... AUGGAUUCGAUUAUUCCCGUGCAUCAGUUGUAGCUGCUGGUUUAGCA
5,6,12,24 env-67 UUCAAAAU..... AUGGAUUCGAUUAUUCCCGUGCAUCAGUUGUAGCUGCUGGUUUAGCA
5,6,8 env-68 UUCAAA..UU..... AUGGAUUCGAUUAUUCCCGUGCAUCAGUUGUAGCUGCUGGUUUAGCA
5,20 env-69 UUUAAAAU..... AUGGAUUCGAUUAUUCCCGUGCAUCAGUUGUAGCUGCUGG.....
5,6,8 env-70 UUCAAAAU..... AUGGAUUCGAUUAUUCCCGUGCAUCAGUUGUAGCUGCUGGUUUAGCA
5,6,9 env-71 UUCAAAAU..... AUGGAUUCGAUUAUUCCCGUGCAUCAGUUGUAGCUGCUGGUUUAGCA
5,6,16 env-72 UUCAAAAU..... AUGGAUUCGAUUAUUCCCGUGCAUCAGUUGUAGCUGCUG.....
5,6,13 env-73 UUUAAAAU..... AUGGAUUCGAUUAUUCCCGUGCAUCAGUUGUAGCUGCUGGUUUAGCA
5,6,18 env-74 UUCAAAAU..... AUGGAUUCGAUUAUUCCCGUGCAUCAGUUGUAGCUGGUCUAGCA
5,6,25 env-75 UUCAAAAU..... AUGGAUUCGAUUAUUCCCGUGCAUCUGUUGUAGCUGCUGGUUGCA
1 env-76 UUCAAAAU..... AUGGAUUCGAUUAUUCCCGUGCAUCAGUUGUAGCUGCCGCUUAGCA
Pma-6-1 UUCAAAAU..... AUGGAUUCGAUUAUUCCCGUGCAUCUGUUGUAGCUGGCUUAGCA
5,6,12 env-77 UUCAAAAU..... AUGGAUUCGAUUAUUCCCGUGCAUCA.....
1 env-78 UUCAAAAU..... AUGGAUUCGAUUAUUCCCGUG.....
5,6,23 env-79 UUCAAAAU..... AUGGAUUCGAUUAUUCCCGUGCAUCAGUUGUAGCUGCAGGUUUAGCA
5,6,15 env-80 UUCAAAAU..... AUGGAUUCGAUUAUUCCCGUGCAUCAGUGUAGCUGCUGGUUAGCANN
5,26 env-81 UUCAAAAU..... AUGGAUUCGAUUAUUCCCGUGCAUCUGUUGUAGCUGCUGGUCUAGCA
5,26 env-82 UUCAAAAU..... AUGGAUUCGAUUAUUCCCGUGCAUCUGUUGUAGCUGCUGGUCUAGCA
5,6,24 env-83 UUCAAAAU..... AUGGAUUCGAUUAUUCCCGUGCAUCUGUUGUAGCUGCUGGCCUAGCA
5,6,24 env-84 UUCAAAAU..... AUGGAUUCGAUUAUUCCCGUGCAUCUGUUGUAGCUGCUGGCUUAGCA
5,6,18 env-85 UUCAAAAU.....
2 env-86 UUCAAAA.....
5,6,12 env-87 UUCAAAAU..... AUGGAUUCGAUNNNNNNNNNNNNNNNNNNNNNNNNNNNNNNNNNNNNNNN
Ssp-5-1 UGGAUUCGAUCACUUCUGCAGCGUCUGU..GUGGCUGCCGGUCUGGCCUGGCCUUGGCCAUCGGCCCCGGCAUC
.....
Y●●●●●Y●○○○○○○○○○○○-----AUG●●AUC●AUYACV●C●G●CYG●UC●G●Y●GU●G●CYG●YGGYURGC●
AUG W W W W W W W W W W W W W W W W W

```

## 2.15 The cyano-30S motif

No Shine-Dalgarno sequence is annotated because the Shine-Dalgarno sequence appears to be optional in Cyanobacteria [10].

Notes:

<sup>1</sup> The start codon is annotated in GenBank 183 nucleotides downstream of our annotation. Our annotation is based on homology with the sequence listed below, the fact that the ORF with the extra 183 nu-

cleotides does not contain a stop codon, and the conservation of the start codon position relative to the putative RNA motif in the other sequences.

| <b>abbrev. of hits</b> | <b>taxonomy of species</b>                                                                                 |
|------------------------|------------------------------------------------------------------------------------------------------------|
| Ssp-1-1 to Ssp-1-1     | Cyanobacteria Chroococcales <i>Synechococcus sp.</i> CC9311                                                |
| Ssp-2-1 to Ssp-2-1     | Cyanobacteria Chroococcales <i>Synechococcus sp.</i> CC9605                                                |
| Ssp-3-1 to Ssp-3-1     | Cyanobacteria Chroococcales <i>Synechococcus sp.</i> CC9902                                                |
| Ssp-4-1 to Ssp-4-1     | Cyanobacteria Chroococcales <i>Synechococcus sp.</i> RS9917                                                |
| Ssp-5-1 to Ssp-5-1     | Cyanobacteria Chroococcales <i>Synechococcus sp.</i> WH 5701                                               |
| Ssp-6-1 to Ssp-6-1     | Cyanobacteria Chroococcales <i>Synechococcus sp.</i> WH 7805                                               |
| Ssp-7-1 to Ssp-7-1     | Cyanobacteria Chroococcales <i>Synechococcus sp.</i> WH 8102                                               |
| Pma-1-1 to Pma-1-1     | Cyanobacteria Prochlorales Prochlorococcaceae <i>Prochlorococcus marinus str.</i> MIT 9211                 |
| Pma-2-1 to Pma-2-1     | Cyanobacteria Prochlorales Prochlorococcaceae <i>Prochlorococcus marinus str.</i> MIT 9312                 |
| Pma-3-1 to Pma-3-1     | Cyanobacteria Prochlorales Prochlorococcaceae <i>Prochlorococcus marinus str.</i> MIT 9313                 |
| Pma-4-1 to Pma-4-1     | Cyanobacteria Prochlorales Prochlorococcaceae <i>Prochlorococcus marinus str.</i> NATL2A                   |
| Pma-5-1 to Pma-5-1     | Cyanobacteria Prochlorales Prochlorococcaceae <i>Prochlorococcus marinus subsp. marinus str.</i> CCMP1375  |
| Pma-6-1 to Pma-6-1     | Cyanobacteria Prochlorales Prochlorococcaceae <i>Prochlorococcus marinus subsp. pastoris str.</i> CCMP1986 |
| env-1 to env-13        | environmental samples                                                                                      |



| abbrev               | RefSeq accession  |   | 5' at   | 3' at   | genes                                                                            |
|----------------------|-------------------|---|---------|---------|----------------------------------------------------------------------------------|
| <sup>1</sup> Ssp-1-1 | NC_008319.1       | - | 514260  | 514162  | RNA → RpsA (COG0539) → Gph (COG0546) → MetK (COG0192) → XylB (COG1070) →         |
| Ssp-6-1              | NZ_AAOK01000002.1 | + | 36286   | 36384   | RNA → RpsA (COG0539) → Gph (COG0546) → MetK (COG0192) → XylB (COG1070) →         |
| Ssp-4-1              | NZ_AANP01000005.1 | + | 18103   | 18201   | RNA → RpsA (COG0539) → Gph (COG0546) → MetK (COG0192) → XylB (COG1070) →         |
| Pma-3-1              | NC_005071.1       | + | 1772187 | 1772284 | RNA → RpsA (COG0539) → Hydrolase (pfam00702) → MetK (COG0192) → XylB (COG1070) → |
| Pma-1-1              | NZ_AALP01000001.1 | + | 1029265 | 1029364 | RNA → RpsA (COG0539) → Gph (COG0546) → MetK (COG0192) → XylB (COG1070) →         |
| Pma-5-1              | NC_005042.1       | - | 339581  | 339484  | RNA → RpsA (COG0539) → Gph (COG0546) → MetK (COG0192) → XylB (COG1070) →         |
| Pma-4-1              | NC_007335.1       | - | 1650069 | 1649969 | RNA → RpsA (COG0539) → Gph (COG0546) → MetK (COG0192) → XylB (COG1070) →         |
| Ssp-5-1              | NZ_AANO01000001.1 | - | 404983  | 404887  | RNA → RpsA (COG0539) → Gph (COG0546) → MetK (COG0192) → XylB (COG1070) →         |
| Ssp-7-1              | NC_005070.1       | + | 1891495 | 1891596 | RNA → RpsA (COG0539) → Gph (COG0546) → MetK (COG0192) → XylB (COG1070) →         |
| env-1                | AACY01076090.1    | + | 325     | 426     | RNA → unknown → unknown → unknown → unknown →                                    |
| Ssp-2-1              | NC_007516.1       | - | 458247  | 458146  | RNA → RpsA (COG0539) → Hydrolase (pfam00702) → MetK (COG0192) → XylB (COG1070) → |
| Ssp-3-1              | NC_007513.1       | + | 1794279 | 1794380 | RNA → RpsA (COG0539) → Gph (COG0546) → MetK (COG0192) → XylB (COG1070) →         |
| env-2                | AACY01100904.1    | + | 89      | 183     | RNA → unknown →                                                                  |
| Pma-2-1              | NC_007577.1       | - | 304844  | 304750  | RNA → RpsA (COG0539) →                                                           |
| env-3                | AACY01012870.1    | + | 315     | 409     | RNA → unknown →                                                                  |
| env-4                | AACY01114579.1    | - | 151     | 57      | RNA →                                                                            |
| env-5                | AACY01287182.1    | - | 295     | 201     | RNA → unknown →                                                                  |
| env-6                | AACY01124570.1    | + | 40      | 135     | RNA → unknown →                                                                  |
| env-7                | AACY01809377.1    | + | 553     | 648     | RNA → unknown →                                                                  |
| env-8                | AACY01246174.1    | - | 117     | 22      | RNA →                                                                            |
| env-9                | AACY01052204.1    | - | 3538    | 3443    | RNA → unknown →                                                                  |
| env-10               | AACY01667173.1    | - | 725     | 630     | RNA → unknown →                                                                  |
| env-11               | AACY01737885.1    | - | 223     | 128     | RNA →                                                                            |
| env-12               | AACY01171845.1    | + | 167     | 261     | RNA → unknown →                                                                  |
| Pma-6-1              | NC_005072.1       | - | 300337  | 300241  | RNA → RpsA (COG0539) →                                                           |
| env-13               | AACY01035039.1    | - | 993     | 897     | RNA → unknown →                                                                  |

**COG0192** S-adenosylmethionine synthetase [Coenzyme metabolism]

metabolism]

**COG0539** Ribosomal protein S1 [Translation, ribosomal structure and biogenesis]

**pfam00702** haloacid dehalogenase-like hydrolase.

**COG0546** Predicted phosphatases [General function prediction only]

**COG1070** Sugar (pentulose and hexulose) kinases [Carbohydrate transport and



|                      |                                             |                                           |           |
|----------------------|---------------------------------------------|-------------------------------------------|-----------|
| Lla-1-1 to Lla-1-4   | Firmicutes Lactobacillales Streptococcaceae | <i>Lactococcus lactis subsp. cremoris</i> | SK11      |
| Lla-2-1 to Lla-2-4   | Firmicutes Lactobacillales Streptococcaceae | <i>Lactococcus lactis subsp. lactis</i>   | III403    |
| Smu-1-1 to Smu-1-6   | Firmicutes Lactobacillales Streptococcaceae | <i>Streptococcus mutans</i>               | UA159     |
| Spn-1-1 to Spn-1-5   | Firmicutes Lactobacillales Streptococcaceae | <i>Streptococcus pneumoniae</i>           | R6        |
| Spn-2-1 to Spn-2-12  | Firmicutes Lactobacillales Streptococcaceae | <i>Streptococcus pneumoniae</i>           | TIGR4     |
| Spy-1-1 to Spy-1-5   | Firmicutes Lactobacillales Streptococcaceae | <i>Streptococcus pyogenes</i>             | M1 GAS    |
| Spy-2-1 to Spy-2-3   | Firmicutes Lactobacillales Streptococcaceae | <i>Streptococcus pyogenes</i>             | M49 591   |
| Spy-3-1 to Spy-3-5   | Firmicutes Lactobacillales Streptococcaceae | <i>Streptococcus pyogenes</i>             | MGAS10270 |
| Spy-4-1 to Spy-4-3   | Firmicutes Lactobacillales Streptococcaceae | <i>Streptococcus pyogenes</i>             | MGAS10394 |
| Spy-5-1 to Spy-5-6   | Firmicutes Lactobacillales Streptococcaceae | <i>Streptococcus pyogenes</i>             | MGAS10750 |
| Spy-6-1 to Spy-6-3   | Firmicutes Lactobacillales Streptococcaceae | <i>Streptococcus pyogenes</i>             | MGAS2096  |
| Spy-7-1 to Spy-7-5   | Firmicutes Lactobacillales Streptococcaceae | <i>Streptococcus pyogenes</i>             | MGAS315   |
| Spy-8-1 to Spy-8-5   | Firmicutes Lactobacillales Streptococcaceae | <i>Streptococcus pyogenes</i>             | MGAS5005  |
| Spy-9-1 to Spy-9-4   | Firmicutes Lactobacillales Streptococcaceae | <i>Streptococcus pyogenes</i>             | MGAS6180  |
| Spy-10-1 to Spy-10-5 | Firmicutes Lactobacillales Streptococcaceae | <i>Streptococcus pyogenes</i>             | MGAS8232  |
| Spy-11-1 to Spy-11-2 | Firmicutes Lactobacillales Streptococcaceae | <i>Streptococcus pyogenes</i>             | MGAS9429  |
| Spy-12-1 to Spy-12-5 | Firmicutes Lactobacillales Streptococcaceae | <i>Streptococcus pyogenes</i>             | SSI-1     |
| Ssu-1-1 to Ssu-1-9   | Firmicutes Lactobacillales Streptococcaceae | <i>Streptococcus suis</i>                 | 89/1591   |
| Sth-1-1 to Sth-1-2   | Firmicutes Lactobacillales Streptococcaceae | <i>Streptococcus thermophilus</i>         | CNRZ1066  |
| Sth-2-1 to Sth-2-2   | Firmicutes Lactobacillales Streptococcaceae | <i>Streptococcus thermophilus</i>         | LMD-9     |
| Sth-3-1 to Sth-3-2   | Firmicutes Lactobacillales Streptococcaceae | <i>Streptococcus thermophilus</i>         | LMG 18311 |

| abbrev               | RefSeq accession  |   | 5' at   | 3' at   | genes                                 |
|----------------------|-------------------|---|---------|---------|---------------------------------------|
| Lla-2-1              | NC.002662.1       | + | 739381  | 739491  | ←MenF (COG1169) RNA→ RimL (COG1670)→  |
| Lla-1-1              | NZ.AAGO01000139.1 | - | 3688    | 3578    | ←Gnd (COG1023) RNA→ RpiR (COG1737)→   |
| Spy-2-1              | NZ.AAFV01000029.1 | - | 9122    | 9044    | RNA→ NrdF (COG0208)→                  |
| Spy-10-1             | NC.003485.1       | + | 1161915 | 1161993 | RNR_1 (cd01679)→ RNA→ NrdF (COG0208)→ |
| Spy-12-1             | NC.004606.1       | - | 804250  | 804172  | RNR_1 (cd01679)→ RNA→ NrdF (COG0208)→ |
| Spy-7-1              | NC.004070.1       | + | 1092633 | 1092711 | RNR_1 (cd01679)→ RNA→ NrdF (COG0208)→ |
| Spy-3-1              | NC.008022.1       | + | 1151406 | 1151484 | RNR_1 (cd01679)→ RNA→ NrdF (COG0208)→ |
| Spy-4-1              | NC.006086.1       | + | 1096428 | 1096506 | RNR_1 (cd01679)→ RNA→ NrdF (COG0208)→ |
| Spy-6-1              | NC.008023.1       | + | 1152407 | 1152485 | RNR_1 (cd01679)→ RNA→ NrdF (COG0208)→ |
| Spy-4-2              | NC.006086.1       | + | 1096423 | 1096506 | RNR_1 (cd01679)→ RNA→ NrdF (COG0208)→ |
| Spy-11-1             | NC.008021.1       | + | 1128501 | 1128573 | RNR_1 (cd01679)→ RNA→ NrdF (COG0208)→ |
| Spy-8-1              | NC.007297.1       | + | 1100560 | 1100655 | RNR_1 (cd01679)→ RNA→ NrdF (COG0208)→ |
| Spy-1-1              | NC.002737.1       | + | 1144210 | 1144305 | RNR_1 (cd01679)→ RNA→ NrdF (COG0208)→ |
| <sup>3</sup> Spy-8-2 | NC.007297.1       | + | 1100431 | 1100538 | RNR_1 (cd01679)→ RNA→ NrdF (COG0208)→ |
| Spy-9-1              | NC.007296.1       | + | 1123736 | 1123843 | RNR_1 (cd01679)→ RNA→ ←hypo           |
| Spy-3-2              | NC.008022.1       | + | 1151277 | 1151384 | RNR_1 (cd01679)→ RNA→ NrdF (COG0208)→ |
| Spy-5-1              | NC.008024.1       | + | 1173974 | 1174081 | RNR_1 (cd01679)→ RNA→ NrdF (COG0208)→ |
| Spy-5-2              | NC.008024.1       | + | 1174103 | 1174210 | RNR_1 (cd01679)→ RNA→ NrdF (COG0208)→ |
| Spy-1-2              | NC.002737.1       | + | 1144081 | 1144188 | RNR_1 (cd01679)→ RNA→ NrdF (COG0208)→ |
| Spy-10-2             | NC.003485.1       | + | 1161786 | 1161893 | RNR_1 (cd01679)→ RNA→ NrdF (COG0208)→ |
| Spy-12-2             | NC.004606.1       | - | 804379  | 804272  | RNR_1 (cd01679)→ RNA→ NrdF (COG0208)→ |
| Spy-7-2              | NC.004070.1       | + | 1092504 | 1092611 | RNR_1 (cd01679)→ RNA→ NrdF (COG0208)→ |
| Spy-8-3              | NC.007297.1       | + | 1100426 | 1100538 | RNR_1 (cd01679)→ RNA→ NrdF (COG0208)→ |

|                      |                   |   |         |         |                                                     |
|----------------------|-------------------|---|---------|---------|-----------------------------------------------------|
| Spy-9-2              | NC_007296.1       | + | 1123731 | 1123843 | RNR_1 (cd01679) → RNA → ←-hypo                      |
| Spy-3-3              | NC_008022.1       | + | 1151272 | 1151384 | RNR_1 (cd01679) → RNA → NrdF (COG0208) →            |
| Spy-5-3              | NC_008024.1       | + | 1173969 | 1174081 | RNR_1 (cd01679) → RNA → NrdF (COG0208) →            |
| Spy-1-3              | NC_002737.1       | + | 1144076 | 1144188 | RNR_1 (cd01679) → RNA → NrdF (COG0208) →            |
| Spy-10-3             | NC_003485.1       | + | 1161781 | 1161893 | RNR_1 (cd01679) → RNA → NrdF (COG0208) →            |
| Spy-12-3             | NC_004606.1       | - | 804384  | 804272  | RNR_1 (cd01679) → RNA → NrdF (COG0208) →            |
| Spy-7-3              | NC_004070.1       | + | 1092499 | 1092611 | RNR_1 (cd01679) → RNA → NrdF (COG0208) →            |
| Spy-6-2              | NC_008023.1       | + | 1152284 | 1152385 | RNR_1 (cd01679) → RNA → NrdF (COG0208) →            |
| <sup>2</sup> Spy-8-4 | NC_007297.1       | + | 1100459 | 1100538 | RNR_1 (cd01679) → RNA → NrdF (COG0208) →            |
| Spy-9-3              | NC_007296.1       | + | 1123764 | 1123843 | RNR_1 (cd01679) → RNA → ←-hypo                      |
| Spy-3-4              | NC_008022.1       | + | 1151305 | 1151384 | RNR_1 (cd01679) → RNA → NrdF (COG0208) →            |
| Spy-5-4              | NC_008024.1       | + | 1174002 | 1174081 | RNR_1 (cd01679) → RNA → NrdF (COG0208) →            |
| Spy-5-5              | NC_008024.1       | + | 1174131 | 1174210 | RNR_1 (cd01679) → RNA → NrdF (COG0208) →            |
| Spy-1-4              | NC_002737.1       | + | 1144109 | 1144188 | RNR_1 (cd01679) → RNA → NrdF (COG0208) →            |
| Spy-10-4             | NC_003485.1       | + | 1161814 | 1161893 | RNR_1 (cd01679) → RNA → NrdF (COG0208) →            |
| Spy-12-4             | NC_004606.1       | - | 804351  | 804272  | RNR_1 (cd01679) → RNA → NrdF (COG0208) →            |
| Spy-7-4              | NC_004070.1       | + | 1092532 | 1092611 | RNR_1 (cd01679) → RNA → NrdF (COG0208) →            |
| Spy-2-2              | NZ_AAFV01000029.1 | - | 9223    | 9144    | RNA → NrdF (COG0208) →                              |
| Smu-1-1              | NC_004350.1       | - | 627986  | 627874  | RNR_1 (cd01679) → RNA → NrdF (COG0208) →            |
| <sup>1</sup> Smu-1-2 | NC_004350.1       | - | 1500823 | 1500739 | hypo → RNA → MetK (COG0192) →                       |
| Spn-2-1              | NC_003028.1       | + | 497109  | 497217  | GrpE (cd00446) → RNA → HSP70 (pfam00012) →          |
| Spn-2-2              | NZ_AAGY02000057.1 | + | 7485    | 7593    | GrpE (cd00446) → RNA → HSP70 (pfam00012) →          |
| Spn-1-1              | NC_003098.1       | + | 461692  | 461800  | GrpE (cd00446) → RNA → HSP70 (pfam00012) →          |
| Spn-2-3              | NC_003028.1       | + | 413993  | 414106  | PrfC (COG4108) → RNA → RpmB (COG0227) →             |
| Spn-1-2              | NC_003098.1       | + | 393914  | 394027  | PrfC (COG4108) → RNA → RfaJ (COG1442) →             |
| Spn-2-4              | NZ_AAGY02000036.1 | - | 9090    | 8977    | PrfC (COG4108) → RNA → hypo →                       |
| Spn-2-5              | NC_003028.1       | + | 1989945 | 1990059 | ArgS (COG0018) → RNA → ←COG3293 (COG3293)           |
| Spn-2-6              | NZ_AAGY02000106.1 | - | 254     | 140     | ArgS (COG0018) → RNA →                              |
| Spn-1-3              | NC_003098.1       | + | 1870878 | 1870992 | ArgS (COG0018) → RNA → ←COG3293 (COG3293)           |
| Spn-2-7              | NC_003028.1       | - | 557548  | 557438  | hypo → RNA → ←MTHFR (cd00537)                       |
| Spn-1-4              | NC_003098.1       | - | 515396  | 515286  | ←Pnp (COG1185) RNA → ←MTHFR (cd00537)               |
| Spn-2-8              | NZ_AAGY02000055.1 | + | 7747    | 7857    | ←Pnp (COG1185) RNA → ←MTHFR (cd00537)               |
| Lla-2-2              | NC_002662.1       | - | 2274174 | 2274060 | SSB (pfam00436) → RNA → Ribosomal_S18 (pfam01084) → |
| Lla-1-2              | NZ_AAGO01000139.1 | + | 898     | 1012    | SSB (pfam00436) → RNA → Ribosomal_S18 (pfam01084) → |
| Sth-3-1              | NC_006448.1       | - | 1391788 | 1391675 | PrfC (COG4108) → RNA → ←DUF894 (pfam05977)          |
| Sth-1-1              | NC_006449.1       | - | 1399434 | 1399321 | PrfC (COG4108) → RNA → ←DUF894 (pfam05977)          |
| Sth-2-1              | NZ_AAGS01000029.1 | + | 9621    | 9734    | PrfC (COG4108) → RNA → ←DUF894 (pfam05977)          |
| Sth-3-2              | NC_006448.1       | - | 1389119 | 1389008 | ←HTH_XRE (cd00093) RNA → ←COG3859 (COG3859)         |
| Sth-1-2              | NC_006449.1       | - | 1396765 | 1396654 | ←HTH_XRE (cd00093) RNA → ←COG3859 (COG3859)         |
| Sth-2-2              | NZ_AAGS01000029.1 | + | 12290   | 12401   | ←HTH_XRE (cd00093) RNA → ←COG3859 (COG3859)         |
| Lla-1-3              | NZ_AAGO01000069.1 | + | 2935    | 3046    | NrdA (COG0209) → RNA → NrdF (COG0208) →             |
| Lla-2-3              | NC_002662.1       | - | 1002628 | 1002515 | NrdA (COG0209) → RNA → NrdF (COG0208) →             |
| Smu-1-3              | NC_004350.1       | + | 1752431 | 1752549 | CorA (COG0598) → RNA → DUF1129 (pfam06570) →        |

|                      |                    |   |         |         |                                                                                 |
|----------------------|--------------------|---|---------|---------|---------------------------------------------------------------------------------|
| Lla-1-4              | NZ_AAAGO01000030.1 | + | 7079    | 7190    | Biotin_lipoyl (pfam00364)AceF (COG0508)→ RNA→ Lpd (COG1249)→                    |
| Lla-2-4              | NC_002662.1        | - | 60576   | 60465   | Biotin_lipoyl (pfam00364)AceF (COG0508)→ RNA→ Lpd (COG1249)→                    |
| Ssu-1-1              | NZ_AAFA02000013.1  | - | 20262   | 20151   | Obg (COG0536)→ RNA→ hypo (cons)→                                                |
| Smu-1-4              | NC_004350.1        | + | 747449  | 747565  | Obg (COG0536)→ RNA→ hypo→                                                       |
| Ssu-1-2              | NZ_AAFA02000130.1  | - | 3896    | 3810    | COG5562 (COG5562)→ RNA→ GlyRS_alpha_core (cd00733)→                             |
| Ssu-1-3              | NZ_AAFA02000013.1  | - | 20387   | 20276   | Obg (COG0536)→ RNA→ hypo (cons)→                                                |
| Ssu-1-4              | NZ_AAFA02000075.1  | + | 88      | 198     | RNA→ ←COG4043 (COG4043)                                                         |
| Ssu-1-5              | NZ_AAFA02000084.1  | - | 4034    | 3925    | CarA (COG0505)→ RNA→ MGS_CPS_II (cd01424)CarB (COG0458)CPSase_L_D3 (pfam02787)→ |
| Smu-1-5              | NC_004350.1        | - | 751253  | 751138  | GlnQ (COG1126)→ RNA→ ←hypo                                                      |
| Spn-2-9              | NC_003028.1        | + | 50741   | 50853   | PurF (COG0034)→ RNA→ PurM (COG0150)→                                            |
| Spn-2-10             | NZ_AAAGY02000011.1 | + | 9950    | 10062   | PurF (COG0034)→ RNA→ PurM (COG0150)→                                            |
| Smu-1-6              | NC_004350.1        | + | 87538   | 87653   | HSP70 (pfam00012)→ RNA→ DnaJ (COG0484)→                                         |
| Ssu-1-6              | NZ_AAFA02000019.1  | - | 7733    | 7618    | PheS (COG0016)→ RNA→ Acetyltransf_1 (pfam00583)→                                |
| Ssu-1-7              | NZ_AAFA02000019.1  | - | 7385    | 7291    | PheS (COG0016)→ RNA→ Acetyltransf_1 (pfam00583)→                                |
| Spn-2-11             | NC_003028.1        | + | 1989817 | 1989935 | ArgS (COG0018)→ RNA→ ←COG3293 (COG3293)                                         |
| Spn-1-5              | NC_003098.1        | + | 1870750 | 1870868 | ArgS (COG0018)→ RNA→ ←COG3293 (COG3293)                                         |
| Spn-2-12             | NZ_AAAGY02000106.1 | - | 382     | 264     | ArgS (COG0018)→ RNA→                                                            |
| Ssu-1-8              | NZ_AAFA02000072.1  | - | 1767    | 1658    | Peptidase_U32 (pfam01136)→ RNA→ Peptidase_U32 (pfam01136)→                      |
| <sup>1</sup> Spy-4-3 | NC_006086.1        | - | 1079086 | 1078976 | COG4886 (COG4886)→ RNA→ MetK (COG0192)→                                         |
| Spy-8-5              | NC_007297.1        | - | 1083089 | 1082979 | COG4886 (COG4886)→ RNA→ MetK (COG0192)→                                         |
| Spy-9-4              | NC_007296.1        | - | 1104930 | 1104820 | COG4886 (COG4886)→ RNA→ MetK (COG0192)→                                         |
| Spy-11-2             | NC_008021.1        | - | 1109698 | 1109588 | COG4886 (COG4886)→ RNA→ MetK (COG0192)→                                         |
| Spy-3-5              | NC_008022.1        | - | 1133935 | 1133825 | COG4886 (COG4886)→ RNA→ MetK (COG0192)→                                         |
| Spy-6-3              | NC_008023.1        | - | 1133481 | 1133371 | COG4886 (COG4886)→ RNA→ MetK (COG0192)→                                         |
| Spy-5-6              | NC_008024.1        | - | 1155128 | 1155018 | COG4886 (COG4886)→ RNA→ MetK (COG0192)→                                         |
| Spy-1-5              | NC_002737.1        | - | 1126738 | 1126628 | COG4886 (COG4886)→ RNA→ MetK (COG0192)→                                         |
| Spy-10-5             | NC_003485.1        | - | 1144443 | 1144333 | COG4886 (COG4886)→ RNA→ MetK (COG0192)→                                         |
| Spy-12-5             | NC_004606.1        | + | 821711  | 821821  | COG4886 (COG4886)→ RNA→ MetK (COG0192)→                                         |
| Spy-7-5              | NC_004070.1        | - | 1075172 | 1075062 | COG4886 (COG4886)→ RNA→ MetK (COG0192)→                                         |
| Spy-2-3              | NZ_AAFAV01000074.1 | - | 1507    | 1397    | COG4886 (COG4886)→ RNA→ MetK (COG0192)→                                         |
| Ssu-1-9              | NZ_AAFA02000019.1  | - | 7614    | 7514    | PheS (COG0016)→ RNA→ Acetyltransf_1 (pfam00583)→                                |

**cd00093** Helix-turn-helix XRE-family like proteins.

**cd00446** GrpE is the adenine nucleotide exchange factor of DnaK (Hsp70)-type ATPases.

**cd00537** Methylene tetrahydrofolate reductase (MTHFR).

**cd00733** Class II Glycyl-tRNA synthetase (GlyRS) alpha subunit core catalytic domain.

**cd01424** Methylglyoxal synthase-like domain from type II glutamine-dependent carbamoyl phosphate synthetase (CSP).

**cd01679** RNR, class I.

**COG0016** Phenylalanyl-tRNA synthetase alpha subunit [Translation, ribosomal struc-

ture and biogenesis]

**COG0018** Arginyl-tRNA synthetase [Translation, ribosomal structure and biogenesis]

**COG0034** Glutamine phosphoribosylpyrophosphate amidotransferase [Nucleotide transport and metabolism]

**COG0150** Phosphoribosylaminoimidazole (AIR) synthetase [Nucleotide transport and metabolism]

**COG0192** S-adenosylmethionine synthetase [Coenzyme metabolism]

**COG0208** Ribonucleotide reductase, beta subunit [Nucleotide transport and metabolism]

**COG0209** Ribonucleotide reductase, alpha subunit [Nucleotide transport and





|                       |            |                 |                  |                                                |           |
|-----------------------|------------|-----------------|------------------|------------------------------------------------|-----------|
| Lla-1-1 to Lla-1-1    | Firmicutes | Lactobacillales | Streptococcaceae | <i>Lactococcus lactis</i> subsp. <i>lactis</i> | II1403    |
| Sag-1-1 to Sag-1-5    | Firmicutes | Lactobacillales | Streptococcaceae | <i>Streptococcus agalactiae</i>                | 18RS21    |
| Sag-2-1 to Sag-2-3    | Firmicutes | Lactobacillales | Streptococcaceae | <i>Streptococcus agalactiae</i>                | 2603V/R   |
| Sag-3-1 to Sag-3-2    | Firmicutes | Lactobacillales | Streptococcaceae | <i>Streptococcus agalactiae</i>                | 515       |
| Sag-4-1 to Sag-4-2    | Firmicutes | Lactobacillales | Streptococcaceae | <i>Streptococcus agalactiae</i>                | A909      |
| Sag-5-1 to Sag-5-2    | Firmicutes | Lactobacillales | Streptococcaceae | <i>Streptococcus agalactiae</i>                | CJB111    |
| Sag-6-1 to Sag-6-1    | Firmicutes | Lactobacillales | Streptococcaceae | <i>Streptococcus agalactiae</i>                | COH1      |
| Sag-7-1 to Sag-7-2    | Firmicutes | Lactobacillales | Streptococcaceae | <i>Streptococcus agalactiae</i>                | H36B      |
| Sag-8-1 to Sag-8-2    | Firmicutes | Lactobacillales | Streptococcaceae | <i>Streptococcus agalactiae</i>                | NEM316    |
| Smu-1-1 to Smu-1-33   | Firmicutes | Lactobacillales | Streptococcaceae | <i>Streptococcus mutans</i>                    | UA159     |
| Spn-1-1 to Spn-1-20   | Firmicutes | Lactobacillales | Streptococcaceae | <i>Streptococcus pneumoniae</i>                | R6        |
| Spn-2-1 to Spn-2-43   | Firmicutes | Lactobacillales | Streptococcaceae | <i>Streptococcus pneumoniae</i>                | TIGR4     |
| Spy-1-1 to Spy-1-17   | Firmicutes | Lactobacillales | Streptococcaceae | <i>Streptococcus pyogenes</i>                  | M1 GAS    |
| Spy-2-1 to Spy-2-10   | Firmicutes | Lactobacillales | Streptococcaceae | <i>Streptococcus pyogenes</i>                  | M49 591   |
| Spy-3-1 to Spy-3-16   | Firmicutes | Lactobacillales | Streptococcaceae | <i>Streptococcus pyogenes</i>                  | MGAS10270 |
| Spy-4-1 to Spy-4-18   | Firmicutes | Lactobacillales | Streptococcaceae | <i>Streptococcus pyogenes</i>                  | MGAS10394 |
| Spy-5-1 to Spy-5-19   | Firmicutes | Lactobacillales | Streptococcaceae | <i>Streptococcus pyogenes</i>                  | MGAS10750 |
| Spy-6-1 to Spy-6-18   | Firmicutes | Lactobacillales | Streptococcaceae | <i>Streptococcus pyogenes</i>                  | MGAS2096  |
| Spy-7-1 to Spy-7-18   | Firmicutes | Lactobacillales | Streptococcaceae | <i>Streptococcus pyogenes</i>                  | MGAS315   |
| Spy-8-1 to Spy-8-17   | Firmicutes | Lactobacillales | Streptococcaceae | <i>Streptococcus pyogenes</i>                  | MGAS5005  |
| Spy-9-1 to Spy-9-17   | Firmicutes | Lactobacillales | Streptococcaceae | <i>Streptococcus pyogenes</i>                  | MGAS6180  |
| Spy-10-1 to Spy-10-18 | Firmicutes | Lactobacillales | Streptococcaceae | <i>Streptococcus pyogenes</i>                  | MGAS8232  |
| Spy-11-1 to Spy-11-18 | Firmicutes | Lactobacillales | Streptococcaceae | <i>Streptococcus pyogenes</i>                  | MGAS9429  |
| Spy-12-1 to Spy-12-17 | Firmicutes | Lactobacillales | Streptococcaceae | <i>Streptococcus pyogenes</i>                  | SSI-1     |
| Ssu-1-1 to Ssu-1-15   | Firmicutes | Lactobacillales | Streptococcaceae | <i>Streptococcus suis</i>                      | 89/1591   |
| Sth-1-1 to Sth-1-7    | Firmicutes | Lactobacillales | Streptococcaceae | <i>Streptococcus thermophilus</i>              | CNRZ1066  |
| Sth-2-1 to Sth-2-7    | Firmicutes | Lactobacillales | Streptococcaceae | <i>Streptococcus thermophilus</i>              | LMD-9     |
| Sth-3-1 to Sth-3-9    | Firmicutes | Lactobacillales | Streptococcaceae | <i>Streptococcus thermophilus</i>              | LMG 18311 |

| abbrev               | RefSeq accession  |   | 5' at   | 3' at   | genes                                              |
|----------------------|-------------------|---|---------|---------|----------------------------------------------------|
| Sag-4-1              | NC_007432.1       | + | 687878  | 687950  | hypo → RNA → COG5280 (COG5280)COG5412 (COG5412) →  |
| Sag-5-1              | NZ_AAJQ01000012.1 | + | 7502    | 7574    | hypo → RNA → COG5280 (COG5280)COG5412 (COG5412) →  |
| Spn-2-1              | NC_003028.1       | + | 557821  | 557894  | ← hypo RNA → Pnp (COG1185) →                       |
| Spn-1-1              | NC_003098.1       | + | 515669  | 515742  | MTHFR (cd00537) → RNA → Pnp (COG1185) →            |
| Spn-2-2              | NZ_AAGY02000055.1 | - | 7474    | 7401    | MTHFR (cd00537) → RNA → Pnp (COG1185) →            |
| Spn-2-3              | NC_003028.1       | - | 497087  | 497014  | ← HSP70 (pfam00012) RNA → ← GrpE (cd00446)         |
| Spn-1-2              | NC_003098.1       | - | 461670  | 461597  | ← HSP70 (pfam00012) RNA → ← GrpE (cd00446)         |
| Spn-2-4              | NZ_AAGY02000057.1 | - | 7463    | 7390    | ← HSP70 (pfam00012) RNA → ← GrpE (cd00446)         |
| <sup>1</sup> Spy-8-1 | NC_007297.1       | + | 18760   | 18834   | tRNA-Ala → RNA → large subunit 23S ribosomal RNA → |
| Spy-8-2              | NC_007297.1       | + | 24761   | 24835   | tRNA-Ala → RNA → large subunit 23S ribosomal RNA → |
| Spy-8-3              | NC_007297.1       | + | 81567   | 81641   | tRNA-Ala → RNA → large subunit 23S ribosomal RNA → |
| Spy-8-4              | NC_007297.1       | + | 266686  | 266760  | tRNA-Ala → RNA → large subunit 23S ribosomal RNA → |
| Spy-8-5              | NC_007297.1       | - | 1578487 | 1578413 | tRNA-Ala → RNA → large subunit 23S ribosomal RNA → |
| Spy-8-6              | NC_007297.1       | - | 1289424 | 1289350 | tRNA-Ala → RNA → large subunit 23S ribosomal RNA → |
| Spy-9-1              | NC_007296.1       | + | 18763   | 18837   | tRNA-Ala → RNA → 16S small subunit ribosomal RNA → |
| Spy-9-2              | NC_007296.1       | + | 24764   | 24838   | tRNA-Ala → RNA → 16S small subunit ribosomal RNA → |
| Spy-9-3              | NC_007296.1       | + | 81053   | 81127   | tRNA-Ala → RNA → 16S small subunit ribosomal RNA → |



|                      |                   |   |         |         |                                                                                                                    |
|----------------------|-------------------|---|---------|---------|--------------------------------------------------------------------------------------------------------------------|
| Spy-9-4              | NC_007296.1       | + | 270235  | 270309  | tRNA-Ala → RNA → 16S small subunit ribosomal RNA →                                                                 |
| Spy-9-5              | NC_007296.1       | - | 1608329 | 1608255 | tRNA-Ala → RNA → 23S large subunit ribosomal RNA →                                                                 |
| Spy-3-1              | NC_008022.1       | + | 18760   | 18834   | 16S small subunit ribosomal RNA → RNA → 16S small subunit ribosomal RNA →                                          |
| Spy-3-2              | NC_008022.1       | + | 24761   | 24835   | 16S small subunit ribosomal RNA → RNA → 16S small subunit ribosomal RNA →                                          |
| Spy-3-3              | NC_008022.1       | + | 81747   | 81821   | 16S small subunit ribosomal RNA → RNA → 16S small subunit ribosomal RNA →                                          |
| Spy-3-4              | NC_008022.1       | + | 270926  | 271000  | 16S small subunit ribosomal RNA → RNA → 16S small subunit ribosomal RNA →                                          |
| Spy-3-5              | NC_008022.1       | - | 1383326 | 1383252 | tRNA-Ala → RNA → 23S large subunit ribosomal RNA →                                                                 |
| Spy-6-1              | NC_008023.1       | + | 18765   | 18839   | 16S small subunit ribosomal RNA → RNA → 16S small subunit ribosomal RNA →                                          |
| Spy-6-2              | NC_008023.1       | + | 24766   | 24840   | 16S small subunit ribosomal RNA → RNA → 16S small subunit ribosomal RNA →                                          |
| Spy-6-3              | NC_008023.1       | + | 274273  | 274347  | 16S small subunit ribosomal RNA → RNA → 16S small subunit ribosomal RNA →                                          |
| Spy-6-4              | NC_008023.1       | - | 1595517 | 1595443 | tRNA-Ala → RNA → 23S large subunit ribosomal RNA →                                                                 |
| Spy-6-5              | NC_008023.1       | - | 1307842 | 1307768 | tRNA-Ala → RNA → 23S large subunit ribosomal RNA →                                                                 |
| Spy-5-1              | NC_008024.1       | + | 18761   | 18835   | 16S small subunit ribosomal RNA → RNA → 16S small subunit ribosomal RNA →                                          |
| Spy-5-2              | NC_008024.1       | + | 24762   | 24836   | 16S small subunit ribosomal RNA → RNA → 16S small subunit ribosomal RNA →                                          |
| Spy-5-3              | NC_008024.1       | + | 267021  | 267095  | 16S small subunit ribosomal RNA → RNA → 16S small subunit ribosomal RNA →                                          |
| Spy-5-4              | NC_008024.1       | - | 1613064 | 1612990 | tRNA-Ala → RNA → 23S large subunit ribosomal RNA →                                                                 |
| Spy-5-5              | NC_008024.1       | - | 1366498 | 1366424 | tRNA-Ala → RNA → 23S large subunit ribosomal RNA →                                                                 |
| Spy-1-1              | NC_002737.1       | + | 18791   | 18865   | tRNA-Ala → RNA → 23S ribosomal RNA →                                                                               |
| Spy-1-2              | NC_002737.1       | + | 24792   | 24866   | tRNA-Ala → RNA → 23S ribosomal RNA →                                                                               |
| Spy-1-3              | NC_002737.1       | + | 81010   | 81084   | tRNA-Ala → RNA → 23S ribosomal RNA →                                                                               |
| Spy-1-4              | NC_002737.1       | + | 266076  | 266150  | tRNA-Ala → RNA → 23S ribosomal RNA →                                                                               |
| Spy-1-5              | NC_002737.1       | - | 1581401 | 1581327 | tRNA-Ala → RNA → 23S ribosomal RNA →                                                                               |
| Spy-1-6              | NC_002737.1       | - | 1334465 | 1334391 | tRNA-Ala → RNA → 23S ribosomal RNA →                                                                               |
| <sup>1</sup> Spy-9-6 | NC_007296.1       | - | 1359051 | 1358977 | tRNA-Ala → RNA → 23S large subunit ribosomal RNA →                                                                 |
| Spy-11-1             | NC_008021.1       | + | 18763   | 18837   | tRNA-Ala → RNA → 16S small subunit ribosomal RNA →                                                                 |
| Spy-11-2             | NC_008021.1       | + | 24764   | 24838   | tRNA-Ala → RNA → 16S small subunit ribosomal RNA →                                                                 |
| Spy-11-3             | NC_008021.1       | + | 81375   | 81449   | tRNA-Ala → RNA → 16S small subunit ribosomal RNA →                                                                 |
| Spy-11-4             | NC_008021.1       | + | 273350  | 273424  | tRNA-Ala → RNA → 16S small subunit ribosomal RNA →                                                                 |
| Spy-11-5             | NC_008021.1       | - | 1571632 | 1571558 | tRNA-Ala → RNA → 23S large subunit ribosomal RNA →                                                                 |
| Spy-11-6             | NC_008021.1       | - | 1284000 | 1283926 | tRNA-Ala → RNA → 23S large subunit ribosomal RNA →                                                                 |
| Spy-6-6              | NC_008023.1       | + | 81351   | 81425   | 16S small subunit ribosomal RNA → RNA → 16S small subunit ribosomal RNA →                                          |
| Spy-2-1              | NZ_AAFV01000024.1 | - | 7102    | 7028    | RNA →                                                                                                              |
|                      |                   |   |         |         | COG1782: Predicted metal-dependent RNase, consists of a metallo-beta-lactamase domain and an RNA-binding KH domain |
| <sup>1</sup> Spy-4-1 | NC_006086.1       | + | 19849   | 19923   | tRNA-Ala → RNA → 23S ribosomal RNA →                                                                               |
| Spy-4-2              | NC_006086.1       | + | 25850   | 25924   | tRNA-Ala → RNA → 23S ribosomal RNA →                                                                               |
| Spy-4-3              | NC_006086.1       | + | 122425  | 122499  | tRNA-Ala → RNA → 23S ribosomal RNA →                                                                               |
| Spy-4-4              | NC_006086.1       | + | 298786  | 298860  | tRNA-Ala → RNA → 23S ribosomal RNA →                                                                               |
| Spy-4-5              | NC_006086.1       | - | 1629285 | 1629211 | tRNA-Ala → RNA → 23S ribosomal RNA →                                                                               |
| Spy-4-6              | NC_006086.1       | - | 1361522 | 1361448 | tRNA-Ala → RNA → 23S ribosomal RNA →                                                                               |
| Spy-3-6              | NC_008022.1       | - | 1633817 | 1633743 | tRNA-Ala → RNA → 23S large subunit ribosomal RNA →                                                                 |
| Spy-12-1             | NC_004606.1       | + | 18790   | 18864   | tRNA-Ala → RNA → 23S ribosomal RNA →                                                                               |
| Spy-12-2             | NC_004606.1       | + | 75769   | 75843   | tRNA-Ala → RNA → 23S ribosomal RNA →                                                                               |
| Spy-12-3             | NC_004606.1       | + | 251824  | 251898  | tRNA-Ala → RNA → 23S ribosomal RNA →                                                                               |
| Spy-12-4             | NC_004606.1       | + | 538960  | 539034  | tRNA-Ala → RNA → 23S ribosomal RNA →                                                                               |

|                      |                   |   |         |         |                                                                            |
|----------------------|-------------------|---|---------|---------|----------------------------------------------------------------------------|
| Spy-12-5             | NC_004606.1       | - | 1638833 | 1638759 | tRNA-Ala → RNA → 23S ribosomal RNA →                                       |
| Spy-7-1              | NC_004070.1       | + | 18790   | 18864   | tRNA-Ala → RNA → 23S ribosomal RNA →                                       |
| Spy-7-2              | NC_004070.1       | + | 24792   | 24866   | tRNA-Ala → RNA → 23S ribosomal RNA →                                       |
| Spy-7-3              | NC_004070.1       | + | 81770   | 81844   | tRNA-Ala → RNA → 23S ribosomal RNA →                                       |
| Spy-7-4              | NC_004070.1       | + | 257912  | 257986  | tRNA-Ala → RNA → 23S ribosomal RNA →                                       |
| Spy-7-5              | NC_004070.1       | - | 1645047 | 1644973 | tRNA-Ala → RNA → 23S ribosomal RNA →                                       |
| Spy-7-6              | NC_004070.1       | - | 1357926 | 1357852 | tRNA-Ala → RNA → 23S ribosomal RNA →                                       |
| <sup>1</sup> Spy-5-6 | NC_008024.1       | + | 83938   | 84012   | 16S small subunit ribosomal RNA → RNA → 16S small subunit ribosomal RNA →  |
| <sup>1</sup> Ssu-1-1 | NZ_AAFA02000006.1 | - | 24636   | 24563   | tRNA-Ala → RNA → tRNA-Asn →                                                |
| Spy-10-1             | NC_003485.1       | + | 18758   | 18834   | 16S ribosomal RNA → RNA → 23S ribosomal RNA →                              |
| Spy-10-2             | NC_003485.1       | + | 24759   | 24835   | 16S ribosomal RNA → RNA → 23S ribosomal RNA →                              |
| Spy-10-3             | NC_003485.1       | + | 81661   | 81737   | 16S ribosomal RNA → RNA → 23S ribosomal RNA →                              |
| Spy-10-4             | NC_003485.1       | + | 259718  | 259794  | 16S ribosomal RNA → RNA → 23S ribosomal RNA →                              |
| Spy-10-5             | NC_003485.1       | - | 1637097 | 1637021 | 16S ribosomal RNA → RNA → 23S ribosomal RNA →                              |
| Spy-10-6             | NC_003485.1       | - | 1347473 | 1347397 | 16S ribosomal RNA → RNA → 23S ribosomal RNA →                              |
| Smu-1-1              | NC_004350.1       | - | 1551272 | 1551200 | PyrH (COG0528) → RNA → RRF (cd00520) →                                     |
| Smu-1-2              | NC_004350.1       | + | 431965  | 432037  | TrxB (COG0492) → RNA → NAPRTase_A (cd01570) →                              |
| Smu-1-3              | NC_004350.1       | - | 1229449 | 1229376 | COG1481 (COG1481) → RNA → Peptidase_U34 (pfam03577) →                      |
| Ssu-1-2              | NZ_AAFA02000140.1 | - | 1943    | 1871    | ←EF_TS (pfam00889) RNA → ←Ribosomal_S2 (pfam00318)                         |
| <sup>1</sup> Smu-1-4 | NC_004350.1       | + | 1655824 | 1655898 | ←5S ribosomal RNA RNA → ←23S ribosomal RNA                                 |
| Smu-1-5              | NC_004350.1       | + | 1684126 | 1684200 | ←5S ribosomal RNA RNA → ←23S ribosomal RNA                                 |
| Smu-1-6              | NC_004350.1       | + | 1873403 | 1873477 | ←5S ribosomal RNA RNA → ←23S ribosomal RNA                                 |
| Smu-1-7              | NC_004350.1       | - | 190683  | 190609  | ←5S ribosomal RNA RNA → ←23S ribosomal RNA                                 |
| Smu-1-8              | NC_004350.1       | - | 21811   | 21737   | ←5S ribosomal RNA RNA → ←23S ribosomal RNA                                 |
| Spy-4-7              | NC_006086.1       | + | 719170  | 719245  | Pnp (COG0005) → RNA → DeoD (COG0813) →                                     |
| Spy-8-7              | NC_007297.1       | + | 701823  | 701898  | Pnp (COG0005) → RNA → DeoD (COG0813) →                                     |
| Spy-11-7             | NC_008021.1       | + | 740414  | 740489  | Pnp (COG0005) → RNA → DeoD (COG0813) →                                     |
| Spy-6-7              | NC_008023.1       | + | 741823  | 741898  | Pnp (COG0005) → RNA → DeoD (COG0813) →                                     |
| Spy-5-7              | NC_008024.1       | + | 764771  | 764846  | Pnp (COG0005) → RNA → DeoD (COG0813) →                                     |
| Spy-1-7              | NC_002737.1       | + | 740803  | 740878  | Pnp (COG0005) → RNA → DeoD (COG0813) →                                     |
| Spy-10-7             | NC_003485.1       | + | 781774  | 781849  | Pnp (COG0005) → RNA → DeoD (COG0813) →                                     |
| Spy-12-6             | NC_004606.1       | - | 1224640 | 1224565 | Pnp (COG0005) → RNA → DeoD (COG0813) →                                     |
| Spy-7-7              | NC_004070.1       | + | 672094  | 672169  | Pnp (COG0005) → RNA → DeoD (COG0813) →                                     |
| Spy-2-2              | NZ_AAFV01000128.1 | + | 2543    | 2616    | Pnp (COG0005) → RNA → DeoD (COG0813) →                                     |
| Ssu-1-3              | NZ_AAFA02000067.1 | + | 1638    | 1712    | Era (COG1159) → RNA → Nei (COG0266) →                                      |
| Spy-2-3              | NZ_AAFV01000004.1 | - | 6737    | 6664    | hypo → RNA → Adenylsuccinate_lyase_1 (cd01360) →                           |
| Spy-4-8              | NC_006086.1       | + | 92612   | 92685   | Hypothetical cytosolic protein → RNA → Adenylsuccinate_lyase_1 (cd01360) → |
| Spy-11-8             | NC_008021.1       | + | 51552   | 51625   | ←hypo RNA → Adenylsuccinate_lyase_1 (cd01360) →                            |
| Spy-6-8              | NC_008023.1       | + | 51527   | 51600   | ←hypo RNA → Adenylsuccinate_lyase_1 (cd01360) →                            |
| Spy-12-7             | NC_004606.1       | + | 45954   | 46027   | hypo → RNA → Adenylsuccinate_lyase_1 (cd01360) →                           |
| Spy-7-8              | NC_004070.1       | + | 51955   | 52028   | hypo → RNA → Adenylsuccinate_lyase_1 (cd01360) →                           |
| Spy-5-8              | NC_008024.1       | + | 53030   | 53103   | hypo → RNA → Adenylsuccinate_lyase_1 (cd01360) →                           |
| Ssu-1-4              | NZ_AAFA02000024.1 | - | 3629    | 3556    | COG4894 (COG4894) → RNA → tRNA-synt_2c (pfam01411)DHHA1 (pfam02272) →      |

|           |                    |   |         |         |                                                                         |
|-----------|--------------------|---|---------|---------|-------------------------------------------------------------------------|
| Spy-10-8  | NC_003485.1        | + | 51836   | 51911   | hypo → RNA → Adenylsuccinate_lyase_1 (cd01360) →                        |
| Spn-2-5   | NC_003028.1        | - | 200720  | 200648  | ← RplF (COG0097) RNA → ← Ribosomal_S8 (pfam00410)                       |
| Spn-1-3   | NC_003098.1        | - | 203230  | 203158  | ← RplF (COG0097) RNA → ← Ribosomal_S8 (pfam00410)                       |
| Spn-2-6   | NZ_AAAGY02000002.1 | + | 22267   | 22339   | ← RplF (COG0097) RNA → ← Ribosomal_S8 (pfam00410)                       |
| Spn-1-4   | NC_003098.1        | + | 736253  | 736326  | Conserved hypothetical protein, truncation → RNA → DeoD (COG0813) →     |
| Spn-2-7   | NC_003028.1        | + | 783399  | 783472  | hemolysin-related protein → RNA → DeoD (COG0813) →                      |
| Spn-2-8   | NZ_AAAGY02000193.1 | + | 151     | 224     | RNA → DeoD (COG0813) →                                                  |
| Smu-1-9   | NC_004350.1        | - | 1887437 | 1887362 | Ribosomal_S8 (pfam00410) → RNA → RplF (COG0097) →                       |
| Spy-10-9  | NC_003485.1        | - | 230617  | 230543  | ← FusA (COG0480) RNA → ← RpsG (COG0049)                                 |
| Spy-8-8   | NC_007297.1        | - | 237610  | 237536  | ← FusA (COG0480) RNA → ← RpsG (COG0049)                                 |
| Spy-9-7   | NC_007296.1        | - | 241133  | 241059  | ← FusA (COG0480) RNA → ← RpsG (COG0049)                                 |
| Spy-3-7   | NC_008022.1        | - | 241825  | 241751  | ← FusA (COG0480) RNA → ← RpsG (COG0049)                                 |
| Spy-5-9   | NC_008024.1        | - | 237917  | 237843  | ← FusA (COG0480) RNA → ← RpsG (COG0049)                                 |
| Spy-1-8   | NC_002737.1        | - | 236999  | 236925  | ← FusA (COG0480) RNA → ← RpsG (COG0049)                                 |
| Spy-4-9   | NC_006086.1        | - | 269684  | 269610  | ← FusA (COG0480) RNA → ← RpsG (COG0049)                                 |
| Spy-11-9  | NC_008021.1        | - | 244246  | 244172  | ← FusA (COG0480) RNA → ← RpsG (COG0049)                                 |
| Spy-6-9   | NC_008023.1        | - | 245168  | 245094  | ← Protein Translation Elongation Factor G (EF-G) RNA → ← RpsG (COG0049) |
| Spy-12-8  | NC_004606.1        | - | 222719  | 222645  | ← FusA (COG0480) RNA → hypo →                                           |
| Spy-7-9   | NC_004070.1        | - | 228809  | 228735  | ← FusA (COG0480) RNA → ← RpsG (COG0049)                                 |
| Spn-2-9   | NC_003028.1        | - | 200039  | 199965  | ← Ribosomal_S8 (pfam00410) RNA → hypo →                                 |
| Spn-1-5   | NC_003098.1        | - | 202549  | 202475  | ← Ribosomal_S8 (pfam00410) RNA → ← Ribosomal_S14 (pfam00253)            |
| Spn-2-10  | NZ_AAAGY02000002.1 | + | 22948   | 23022   | ← Ribosomal_S8 (pfam00410) RNA → ← Ribosomal_S14 (pfam00253)            |
| Spn-2-11  | NC_003028.1        | + | 1528165 | 1528239 | ← Cad (pfam03596) RNA → ← Ribosomal_S15p_S13e (cd00353)                 |
| Spn-2-12  | NZ_AAAGY02000066.1 | + | 1354    | 1428    | ← Cad (pfam03596) RNA → ← Ribosomal_S15p_S13e (cd00353)                 |
| Spn-2-13  | NC_003028.1        | - | 1701359 | 1701286 | NUDIX (pfam00293) → RNA → PrmA (pfam06325) →                            |
| Spn-1-6   | NC_003098.1        | - | 1585026 | 1584953 | NUDIX (pfam00293) → RNA → PrmA (pfam06325) →                            |
| Spn-2-14  | NZ_AAAGY02000087.1 | - | 5269    | 5196    | NUDIX (pfam00293) → RNA → PrmA (pfam06325) →                            |
| Spy-8-9   | NC_007297.1        | + | 64664   | 64738   | RpsJ (COG0051) → RNA → Ribosomal_L3 (pfam00297) →                       |
| Spy-1-9   | NC_002737.1        | + | 64075   | 64149   | RpsJ (COG0051) → RNA → Ribosomal_L3 (pfam00297) →                       |
| Spy-4-10  | NC_006086.1        | + | 105495  | 105569  | RpsJ (COG0051) → RNA → Ribosomal_L3 (pfam00297) →                       |
| Spy-9-8   | NC_007296.1        | + | 64118   | 64192   | RpsJ (COG0051) → RNA → Ribosomal_L3 (pfam00297) →                       |
| Spy-11-10 | NC_008021.1        | + | 64440   | 64514   | RpsJ (COG0051) → RNA → Ribosomal_L3 (pfam00297) →                       |
| Spy-3-8   | NC_008022.1        | + | 64812   | 64886   | RpsJ (COG0051) → RNA → Ribosomal_L3 (pfam00297) →                       |
| Spy-6-10  | NC_008023.1        | + | 64415   | 64489   | RpsJ (COG0051) → RNA → Ribosomal_L3 (pfam00297) →                       |
| Spy-5-10  | NC_008024.1        | + | 65915   | 65989   | RpsJ (COG0051) → RNA → LSU ribosomal protein L3P →                      |
| Spy-10-10 | NC_003485.1        | + | 64724   | 64798   | RpsJ (COG0051) → RNA → Ribosomal_L3 (pfam00297) →                       |
| Spy-12-9  | NC_004606.1        | + | 58832   | 58906   | RpsJ (COG0051) → RNA → hypo →                                           |
| Spy-7-10  | NC_004070.1        | + | 64833   | 64907   | RpsJ (COG0051) → RNA → Ribosomal_L3 (pfam00297) →                       |
| Spy-10-11 | NC_003485.1        | - | 230502  | 230428  | ← FusA (COG0480) RNA → ← RpsG (COG0049)                                 |
| Spy-8-10  | NC_007297.1        | - | 237496  | 237422  | ← FusA (COG0480) RNA → ← RpsG (COG0049)                                 |
| Spy-9-9   | NC_007296.1        | - | 241019  | 240945  | ← FusA (COG0480) RNA → ← RpsG (COG0049)                                 |
| Spy-1-10  | NC_002737.1        | - | 236885  | 236811  | ← FusA (COG0480) RNA → ← RpsG (COG0049)                                 |
| Spy-4-11  | NC_006086.1        | - | 269569  | 269495  | ← FusA (COG0480) RNA → ← RpsG (COG0049)                                 |

|           |                    |   |         |         |                                                                                      |
|-----------|--------------------|---|---------|---------|--------------------------------------------------------------------------------------|
| Spy-12-10 | NC_004606.1        | - | 222604  | 222530  | hypo → RNA → ←RpsG (COG0049)                                                         |
| Spy-7-11  | NC_004070.1        | - | 228694  | 228620  | ←FusA (COG0480) RNA → ←RpsG (COG0049)                                                |
| Spy-5-11  | NC_008024.1        | - | 237803  | 237729  | ←FusA (COG0480) RNA → ←RpsG (COG0049)                                                |
| Spy-11-11 | NC_008021.1        | - | 244132  | 244058  | ←FusA (COG0480) RNA → ←RpsG (COG0049)                                                |
| Spy-6-11  | NC_008023.1        | - | 245054  | 244980  | ←Protein Translation Elongation Factor G (EF-G) RNA → ←RpsG (COG0049)                |
| Spy-5-12  | NC_008024.1        | - | 237686  | 237612  | ←FusA (COG0480) RNA → ←RpsG (COG0049)                                                |
| Spy-12-11 | NC_004606.1        | - | 222487  | 222413  | hypo → RNA → ←RpsG (COG0049)                                                         |
| Spy-7-12  | NC_004070.1        | - | 228577  | 228503  | ←FusA (COG0480) RNA → ←RpsG (COG0049)                                                |
| Spn-1-7   | NC_003098.1        | - | 1977823 | 1977749 | ←hypo RNA → Transposase, uncharacterized, truncation →                               |
| Spn-2-15  | NC_003028.1        | + | 228934  | 229008  | Acetyltransf.1 (pfam00583) → RNA → ←hypo                                             |
| Spn-2-16  | NC_003028.1        | - | 2100224 | 2100150 | ←hypo RNA → Transposase_11 (pfam01609) →                                             |
| Spn-2-17  | NZ_AAAGY02000102.1 | - | 1423    | 1349    | Acetyltransf.1 (pfam00583) → RNA → hypo →                                            |
| Spy-3-9   | NC_008022.1        | - | 71976   | 71902   | ←RplF (COG0097) RNA → ←Ribosomal_S8 (pfam00410)                                      |
| Spy-10-12 | NC_003485.1        | - | 71888   | 71814   | ←RplF (COG0097) RNA → ←Ribosomal_S8 (pfam00410)                                      |
| Spy-2-4   | NZ_AAFV01000130.1  | - | 529     | 455     | ←RplF (COG0097) RNA → ←Ribosomal_S8 (pfam00410)                                      |
| Spy-4-12  | NC_006086.1        | - | 112658  | 112584  | ←RplF (COG0097) RNA → ←Ribosomal_S8 (pfam00410)                                      |
| Spy-8-11  | NC_007297.1        | - | 71796   | 71722   | ←RplF (COG0097) RNA → ←Ribosomal_S8 (pfam00410)                                      |
| Spy-9-10  | NC_007296.1        | - | 71283   | 71209   | ←RplF (COG0097) RNA → ←Ribosomal_S8 (pfam00410)                                      |
| Spy-11-12 | NC_008021.1        | - | 71605   | 71531   | ←RplF (COG0097) RNA → ←Ribosomal_S8 (pfam00410)                                      |
| Spy-6-12  | NC_008023.1        | - | 71581   | 71507   | ←RplF (COG0097) RNA → ←Ribosomal_S8 (pfam00410)                                      |
| Spy-5-13  | NC_008024.1        | - | 73077   | 73003   | ←RplF (COG0097) RNA → ←Ribosomal_S8 (pfam00410)                                      |
| Spy-1-11  | NC_002737.1        | - | 71239   | 71165   | ←RplF (COG0097) RNA → ←Ribosomal_S8 (pfam00410)                                      |
| Spy-12-12 | NC_004606.1        | - | 65996   | 65922   | ←RplF (COG0097) RNA → ←Ribosomal_S8 (pfam00410)                                      |
| Spy-7-13  | NC_004070.1        | - | 71997   | 71923   | ←RplF (COG0097) RNA → ←Ribosomal_S8 (pfam00410)                                      |
| Smu-1-10  | NC_004350.1        | + | 302316  | 302391  | DapD (COG2171) → RNA → AbgB (COG1473) →                                              |
| Smu-1-11  | NC_004350.1        | + | 523903  | 523978  | IleS (COG0060) → RNA → ←hypo                                                         |
| Smu-1-12  | NC_004350.1        | + | 636158  | 636233  | Icd (COG0538) → RNA → DUF1113 (pfam06541) →                                          |
| Smu-1-13  | NC_004350.1        | - | 1229334 | 1229259 | COG1481 (COG1481) → RNA → Peptidase_U34 (pfam03577) →                                |
| Sth-3-1   | NC_006448.1        | - | 1092657 | 1092583 | RfbC (COG1898) → RNA → RfbB (COG1088) →                                              |
| Sth-1-1   | NC_006449.1        | - | 1090530 | 1090456 | RfbC (COG1898) → RNA → RfbB (COG1088) →                                              |
| Sth-2-1   | NZ_AAGS01000001.1  | - | 37997   | 37923   | RfbC (COG1898) → RNA → RfbB (COG1088) →                                              |
| Ssu-1-5   | NZ_AAFA02000083.1  | + | 6117    | 6191    | ←Ribosomal_S8 (pfam00410) RNA → ←RpsN (COG0199)                                      |
| Spn-2-18  | NC_003028.1        | - | 1466566 | 1466492 | hypo → RNA → DapB (COG0289) →                                                        |
| Spn-1-8   | NC_003098.1        | - | 1402012 | 1401938 | DegV (COG1307) → RNA → DapB (COG0289) →                                              |
| Spn-2-19  | NZ_AAAGY02000009.1 | - | 12408   | 12334   | DegV (COG1307) → RNA → DapB (COG0289) →                                              |
| Sag-2-1   | NC_004116.1        | - | 1296376 | 1296302 | ←COG5340 (COG5340) RNA → TolA (pfam06519) →                                          |
| Sag-1-1   | NZ_AAJO01000011.1  | - | 12628   | 12554   | ←COG5340 (COG5340) RNA → TolA (pfam06519) →                                          |
| Sag-7-1   | NZ_AAJS01000027.1  | - | 9916    | 9842    | ←COG5340 (COG5340) RNA → TolA (pfam06519) →                                          |
| Ssu-1-6   | NZ_AAFA02000008.1  | - | 15037   | 14964   | hypo → RNA → hypo →                                                                  |
| Ssu-1-7   | NZ_AAFA02000007.1  | + | 6002    | 6075    | ←COG5340 (COG5340) RNA → agglutinin receptor →                                       |
| Ssu-1-8   | NZ_AAFA02000007.1  | + | 14354   | 14427   | TolA (COG3064) → RNA → TolA (COG3064) →                                              |
| Spn-2-20  | NC_003028.1        | - | 1211408 | 1211335 | CarA (COG0505) → RNA → MGS_CPS_II (cd01424) CarB (COG0458) CPSase.L_D3 (pfam02787) → |
| Spn-1-9   | NC_003098.1        | - | 1158023 | 1157950 | CarA (COG0505) → RNA → MGS_CPS_II (cd01424) CarB (COG0458) CPSase.L_D3 (pfam02787) → |

|           |                    |   |         |         |                                                                                      |
|-----------|--------------------|---|---------|---------|--------------------------------------------------------------------------------------|
| Spn-2-21  | NZ_AAAGY02000008.1 | - | 12311   | 12238   | CarA (COG0505) → RNA → CarB (COG0458) CPSase_L_D3 (pfam02787) MGS_CPS_II (cd01424) → |
| Spn-2-22  | NC_003028.1        | + | 499967  | 500040  | hypo → RNA → DnaJ (COG0484) →                                                        |
| Spn-1-10  | NC_003098.1        | + | 464542  | 464615  | HSP70 (pfam00012) → RNA → DnaJ (COG0484) →                                           |
| Spn-2-23  | NZ_AAAGY02000057.1 | + | 10343   | 10416   | HSP70 (pfam00012) → RNA → DnaJ (COG0484) →                                           |
| Ssu-1-9   | NZ_AAFA02000040.1  | + | 4756    | 4830    | HSP70 (pfam00012) → RNA → DnaJ (COG0484) →                                           |
| Sth-3-2   | NC_006448.1        | + | 49506   | 49580   | hypo → RNA → Adenylsuccinate_lyase_1 (cd01360) →                                     |
| Sth-1-2   | NC_006449.1        | + | 49533   | 49607   | hypo → RNA → Adenylsuccinate_lyase_1 (cd01360) →                                     |
| Sth-2-2   | NZ_AAGS01000009.1  | - | 16336   | 16262   | hypo → RNA → Adenylsuccinate_lyase_1 (cd01360) →                                     |
| Smu-1-14  | NC_004350.1        | + | 59145   | 59219   | hypo → RNA → Adenylsuccinate_lyase_1 (cd01360) →                                     |
| Ssu-1-10  | NZ_AAFA02000004.1  | + | 1214    | 1288    | Tdk (COG1435) → RNA → PrfA (COG0216) →                                               |
| Smu-1-15  | NC_004350.1        | - | 1551161 | 1551087 | PyrH (COG0528) → RNA → RRF (cd00520) →                                               |
| Smu-1-16  | NC_004350.1        | - | 1551050 | 1550976 | PyrH (COG0528) → RNA → RRF (cd00520) →                                               |
| Smu-1-17  | NC_004350.1        | + | 431854  | 431927  | TrxB (COG0492) → RNA → NAPRTase_A (cd01570) →                                        |
| Smu-1-18  | NC_004350.1        | - | 1162751 | 1162677 | PyrE (COG0461) → RNA → COG1881 (COG1881) →                                           |
| Smu-1-19  | NC_004350.1        | - | 1837479 | 1837400 | PTS_IIB_man (cd00001) → RNA → EII-Sor (pfam03609) →                                  |
| Spy-8-12  | NC_007297.1        | - | 1358358 | 1358286 | GlyRS_alpha_core (cd00733) → RNA → GlyS (COG0751) →                                  |
| Spy-9-11  | NC_007296.1        | - | 1428014 | 1427942 | GlyRS_alpha_core (cd00733) → RNA → GlyS (COG0751) →                                  |
| Spy-11-13 | NC_008021.1        | - | 1352906 | 1352834 | GlyRS_alpha_core (cd00733) → RNA → GlyS (COG0751) →                                  |
| Spy-3-10  | NC_008022.1        | - | 1451931 | 1451859 | GlyRS_alpha_core (cd00733) → RNA → GlyS (COG0751) →                                  |
| Spy-6-13  | NC_008023.1        | - | 1376800 | 1376728 | GlyRS_alpha_core (cd00733) → RNA → GlyS (COG0751) →                                  |
| Spy-1-12  | NC_002737.1        | - | 1403396 | 1403324 | GlyRS_alpha_core (cd00733) → RNA → GlyS (COG0751) →                                  |
| Spy-2-5   | NZ_AAFV01000113.1  | - | 2717    | 2645    | GlyRS_alpha_core (cd00733) → RNA → GlyS (COG0751) →                                  |
| Spy-4-13  | NC_006086.1        | - | 1430473 | 1430401 | GlyRS_alpha_core (cd00733) → RNA → GlyS (COG0751) →                                  |
| Spy-5-14  | NC_008024.1        | - | 1435465 | 1435393 | GlyRS_alpha_core (cd00733) → RNA → GlyS (COG0751) →                                  |
| Spy-10-13 | NC_003485.1        | - | 1416427 | 1416355 | GlyRS_alpha_core (cd00733) → RNA → GlyS (COG0751) →                                  |
| Spy-12-13 | NC_004606.1        | + | 429984  | 430056  | GlyRS_alpha_core (cd00733) → RNA → GlyS (COG0751) →                                  |
| Spy-7-14  | NC_004070.1        | - | 1466886 | 1466814 | GlyRS_alpha_core (cd00733) → RNA → GlyS (COG0751) →                                  |
| Spy-9-12  | NC_007296.1        | + | 700206  | 700277  | Pnp (COG0005) → RNA → DeoD (COG0813) →                                               |
| Spy-3-11  | NC_008022.1        | + | 734299  | 734370  | Pnp (COG0005) → RNA → DeoD (COG0813) →                                               |
| Spy-2-6   | NZ_AAFV01000128.1  | + | 2692    | 2763    | Pnp (COG0005) → RNA → DeoD (COG0813) →                                               |
| Smu-1-20  | NC_004350.1        | - | 1196168 | 1196097 | GATase1_IGP_Synthase (cd01748) → RNA → HisA (COG0106) →                              |
| Ssu-1-11  | NZ_AAFA02000081.1  | + | 2952    | 3025    | COG0750 (COG0750) → RNA → ProS (COG0442) →                                           |
| Spn-2-24  | NC_003028.1        | + | 193403  | 193478  | RpsJ (COG0051) → RNA → Ribosomal_L3 (pfam00297) →                                    |
| Spn-1-11  | NC_003098.1        | + | 195913  | 195988  | RpsJ (COG0051) → RNA → Ribosomal_L3 (pfam00297) →                                    |
| Spn-2-25  | NZ_AAAGY02000002.1 | - | 29584   | 29509   | RpsJ (COG0051) → RNA → Ribosomal_L3 (pfam00297) →                                    |
| Smu-1-21  | NC_004350.1        | + | 281417  | 281490  | HTH_ARAC (smart00342) → RNA → hypo →                                                 |
| Spy-9-13  | NC_007296.1        | - | 1481736 | 1481661 | HSP70 (pfam00012) → RNA → DnaJ (COG0484) →                                           |
| Spy-5-15  | NC_008024.1        | - | 1489199 | 1489124 | HSP70 (pfam00012) → RNA → DnaJ (COG0484) →                                           |
| Spy-10-14 | NC_003485.1        | - | 1511962 | 1511887 | HSP70 (pfam00012) → RNA → DnaJ (COG0484) →                                           |
| Spy-8-13  | NC_007297.1        | - | 1452936 | 1452861 | HSP70 (pfam00012) → RNA → DnaJ (COG0484) →                                           |
| Spy-1-13  | NC_002737.1        | - | 1457153 | 1457078 | HSP70 (pfam00012) → RNA → DnaJ (COG0484) →                                           |
| Spy-11-14 | NC_008021.1        | - | 1447373 | 1447298 | HSP70 (pfam00012) → RNA → DnaJ (COG0484) →                                           |
| Spy-3-12  | NC_008022.1        | - | 1505706 | 1505631 | HSP70 (pfam00012) → RNA → DnaJ (COG0484) →                                           |

|           |                   |   |         |         |                                                                                 |
|-----------|-------------------|---|---------|---------|---------------------------------------------------------------------------------|
| Spy-6-14  | NC_008023.1       | - | 1471263 | 1471188 | HSP70 (pfam00012) → RNA → DnaJ (COG0484) →                                      |
| Spy-12-14 | NC_004606.1       | + | 374862  | 374937  | HSP70 (pfam00012) → RNA → DnaJ (COG0484) →                                      |
| Spy-7-15  | NC_004070.1       | - | 1522008 | 1521933 | HSP70 (pfam00012) → RNA → DnaJ (COG0484) →                                      |
| Spy-4-14  | NC_006086.1       | - | 1484261 | 1484186 | HSP70 (pfam00012) → RNA → DnaJ (COG0484) →                                      |
| Spy-2-7   | NZ_AAFV01000158.1 | - | 117     | 42      | HSP70 (pfam00012) → RNA →                                                       |
| Smu-1-22  | NC_004350.1       | - | 1162638 | 1162563 | PyrE (COG0461) → RNA → COG1881 (COG1881) →                                      |
| Smu-1-23  | NC_004350.1       | - | 1837594 | 1837519 | PTS_IIB_man (cd00001) → RNA → EII-Sor (pfam03609) →                             |
| Ssu-1-12  | NZ_AAFA02000016.1 | - | 13724   | 13649   | MrcB (COG0744) → RNA → RpoB (COG0085) →                                         |
| Spn-1-12  | NC_003098.1       | + | 515429  | 515503  | MTHFR (cd00537) → RNA → Pnp (COG1185) →                                         |
| Spn-2-26  | NC_003028.1       | + | 557581  | 557655  | ←hypo RNA → ←hypo                                                               |
| Spn-2-27  | NZ_AAGY02000055.1 | - | 7714    | 7640    | MTHFR (cd00537) → RNA → Pnp (COG1185) →                                         |
| Spy-4-15  | NC_006086.1       | + | 84957   | 85029   | Formyl_trans_N (pfam00551) → RNA → AICARFT_IMPCHas (pfam01808)MGS (pfam02142) → |
| Spy-8-14  | NC_007297.1       | + | 44009   | 44081   | Formyl_trans_N (pfam00551) → RNA → AICARFT_IMPCHas (pfam01808)MGS (pfam02142) → |
| Spy-9-14  | NC_007296.1       | + | 43718   | 43790   | Formyl_trans_N (pfam00551) → RNA → AICARFT_IMPCHas (pfam01808)MGS (pfam02142) → |
| Spy-11-15 | NC_008021.1       | + | 43745   | 43817   | Formyl_trans_N (pfam00551) → RNA → AICARFT_IMPCHas (pfam01808)MGS (pfam02142) → |
| Spy-3-13  | NC_008022.1       | + | 44113   | 44185   | Formyl_trans_N (pfam00551) → RNA → AICARFT_IMPCHas (pfam01808)MGS (pfam02142) → |
| Spy-6-15  | NC_008023.1       | + | 43720   | 43792   | Formyl_trans_N (pfam00551) → RNA → AICARFT_IMPCHas (pfam01808)MGS (pfam02142) → |
| Spy-5-16  | NC_008024.1       | + | 44005   | 44077   | Formyl_trans_N (pfam00551) → RNA → AICARFT_IMPCHas (pfam01808)MGS (pfam02142) → |
| Spy-1-14  | NC_002737.1       | + | 43421   | 43493   | Formyl_trans_N (pfam00551) → RNA → ←COG3942 (COG3942)                           |
| Spy-10-15 | NC_003485.1       | + | 44028   | 44100   | Formyl_trans_N (pfam00551) → RNA → AICARFT_IMPCHas (pfam01808)MGS (pfam02142) → |
| Spy-12-15 | NC_004606.1       | + | 38144   | 38216   | Formyl_trans_N (pfam00551) → RNA → AICARFT_IMPCHas (pfam01808)MGS (pfam02142) → |
| Spy-7-16  | NC_004070.1       | + | 44145   | 44217   | Formyl_trans_N (pfam00551) → RNA → MGS (pfam02142)AICARFT_IMPCHas (pfam01808) → |
| Spy-2-8   | NZ_AAFV01000004.1 | - | 14570   | 14498   | Formyl_trans_N (pfam00551) → RNA → AICARFT_IMPCHas (pfam01808)MGS (pfam02142) → |
| Spy-4-16  | NC_006086.1       | + | 84956   | 85030   | Formyl_trans_N (pfam00551) → RNA → AICARFT_IMPCHas (pfam01808)MGS (pfam02142) → |
| Spy-8-15  | NC_007297.1       | + | 44008   | 44082   | Formyl_trans_N (pfam00551) → RNA → AICARFT_IMPCHas (pfam01808)MGS (pfam02142) → |
| Spy-9-15  | NC_007296.1       | + | 43717   | 43791   | Formyl_trans_N (pfam00551) → RNA → AICARFT_IMPCHas (pfam01808)MGS (pfam02142) → |
| Spy-11-16 | NC_008021.1       | + | 43744   | 43818   | Formyl_trans_N (pfam00551) → RNA → AICARFT_IMPCHas (pfam01808)MGS (pfam02142) → |
| Spy-3-14  | NC_008022.1       | + | 44112   | 44186   | Formyl_trans_N (pfam00551) → RNA → AICARFT_IMPCHas (pfam01808)MGS (pfam02142) → |
| Spy-6-16  | NC_008023.1       | + | 43719   | 43793   | Formyl_trans_N (pfam00551) → RNA → AICARFT_IMPCHas (pfam01808)MGS (pfam02142) → |
| Spy-5-17  | NC_008024.1       | + | 44004   | 44078   | Formyl_trans_N (pfam00551) → RNA → AICARFT_IMPCHas (pfam01808)MGS (pfam02142) → |
| Spy-1-15  | NC_002737.1       | + | 43420   | 43494   | Formyl_trans_N (pfam00551) → RNA → ←COG3942 (COG3942)                           |
| Spy-10-16 | NC_003485.1       | + | 44027   | 44101   | Formyl_trans_N (pfam00551) → RNA → AICARFT_IMPCHas (pfam01808)MGS (pfam02142) → |
| Spy-12-16 | NC_004606.1       | + | 38143   | 38217   | Formyl_trans_N (pfam00551) → RNA → AICARFT_IMPCHas (pfam01808)MGS (pfam02142) → |
| Spy-7-17  | NC_004070.1       | + | 44144   | 44218   | Formyl_trans_N (pfam00551) → RNA → MGS (pfam02142)AICARFT_IMPCHas (pfam01808) → |
| Spy-2-9   | NZ_AAFV01000004.1 | - | 14571   | 14497   | Formyl_trans_N (pfam00551) → RNA → AICARFT_IMPCHas (pfam01808)MGS (pfam02142) → |
| Spy-4-17  | NC_006086.1       | + | 84209   | 84281   | PurM (COG0150) → RNA → Formyl_trans_N (pfam00551) →                             |
| Spy-8-16  | NC_007297.1       | + | 43261   | 43333   | PurM (COG0150) → RNA → Formyl_trans_N (pfam00551) →                             |
| Spy-9-16  | NC_007296.1       | + | 42970   | 43042   | PurM (COG0150) → RNA → Formyl_trans_N (pfam00551) →                             |
| Spy-11-17 | NC_008021.1       | + | 42997   | 43069   | PurM (COG0150) → RNA → Formyl_trans_N (pfam00551) →                             |
| Spy-3-15  | NC_008022.1       | + | 43365   | 43437   | PurM (COG0150) → RNA → Formyl_trans_N (pfam00551) →                             |
| Spy-6-17  | NC_008023.1       | + | 42972   | 43044   | PurM (COG0150) → RNA → Formyl_trans_N (pfam00551) →                             |
| Spy-5-18  | NC_008024.1       | + | 43257   | 43329   | PurM (COG0150) → RNA → Formyl_trans_N (pfam00551) →                             |
| Spy-1-16  | NC_002737.1       | + | 42673   | 42745   | PurM (COG0150) → RNA → Formyl_trans_N (pfam00551) →                             |

|           |                   |   |         |         |                                                                                      |
|-----------|-------------------|---|---------|---------|--------------------------------------------------------------------------------------|
| Spy-10-17 | NC_003485.1       | + | 43280   | 43352   | PurM (COG0150) → RNA → Formyl_trans_N (pfam00551) →                                  |
| Spy-12-17 | NC_004606.1       | + | 37396   | 37468   | PurM (COG0150) → RNA → Formyl_trans_N (pfam00551) →                                  |
| Spy-7-18  | NC_004070.1       | + | 43397   | 43469   | PurM (COG0150) → RNA → Formyl_trans_N (pfam00551) →                                  |
| Spy-2-10  | NZ_AAFV01000004.1 | - | 15318   | 15246   | PurM (COG0150) → RNA → Formyl_trans_N (pfam00551) →                                  |
| Sag-6-1   | NZ_AAJR01000025.1 | - | 19764   | 19691   | PurM (COG0150) → RNA → Formyl_trans_N (pfam00551) →                                  |
| Sag-4-2   | NC_007432.1       | + | 43094   | 43168   | PurM (COG0150) → RNA → Formyl_trans_N (pfam00551) →                                  |
| Sag-7-2   | NZ_AAJS01000005.1 | + | 26855   | 26929   | PurM (COG0150) → RNA → Formyl_trans_N (pfam00551) →                                  |
| Sag-2-2   | NC_004116.1       | + | 43284   | 43358   | PurM (COG0150) → RNA → Formyl_trans_N (pfam00551) →                                  |
| Sag-8-1   | NC_004368.1       | + | 43179   | 43253   | PurM (COG0150) → RNA → Formyl_trans_N (pfam00551) →                                  |
| Sag-1-2   | NZ_AAJO01000137.1 | - | 3851    | 3777    | PurM (COG0150) → RNA → Formyl_trans_N (pfam00551) →                                  |
| Sag-3-1   | NZ_AAJP01000052.1 | - | 2653    | 2579    | PurM (COG0150) → RNA → Formyl_trans_N (pfam00551) →                                  |
| Sag-5-2   | NZ_AAJO01000011.1 | + | 17395   | 17469   | PurM (COG0150) → RNA → Formyl_trans_N (pfam00551) →                                  |
| Spy-4-18  | NC_006086.1       | + | 84208   | 84282   | PurM (COG0150) → RNA → Formyl_trans_N (pfam00551) →                                  |
| Spy-8-17  | NC_007297.1       | + | 43260   | 43334   | PurM (COG0150) → RNA → Formyl_trans_N (pfam00551) →                                  |
| Spy-9-17  | NC_007296.1       | + | 42969   | 43043   | PurM (COG0150) → RNA → Formyl_trans_N (pfam00551) →                                  |
| Spy-11-18 | NC_008021.1       | + | 42996   | 43070   | PurM (COG0150) → RNA → Formyl_trans_N (pfam00551) →                                  |
| Spy-3-16  | NC_008022.1       | + | 43364   | 43438   | PurM (COG0150) → RNA → Formyl_trans_N (pfam00551) →                                  |
| Spy-6-18  | NC_008023.1       | + | 42971   | 43045   | PurM (COG0150) → RNA → Formyl_trans_N (pfam00551) →                                  |
| Spy-5-19  | NC_008024.1       | + | 43256   | 43330   | PurM (COG0150) → RNA → Formyl_trans_N (pfam00551) →                                  |
| Spy-1-17  | NC_002737.1       | + | 42672   | 42746   | PurM (COG0150) → RNA → Formyl_trans_N (pfam00551) →                                  |
| Spy-10-18 | NC_003485.1       | + | 43279   | 43353   | PurM (COG0150) → RNA → Formyl_trans_N (pfam00551) →                                  |
| Smu-1-24  | NC_004350.1       | - | 1146715 | 1146639 | hypo → RNA → GyrA (COG0188) →                                                        |
| Smu-1-25  | NC_004350.1       | - | 1388698 | 1388624 | hypo → RNA → RfbB (COG1088) →                                                        |
| Sth-3-3   | NC_006448.1       | + | 46470   | 46544   | PurD (COG0151) → RNA → PurE (COG0041) →                                              |
| Sth-1-3   | NC_006449.1       | + | 46497   | 46571   | PurD (COG0151) → RNA → PurE (COG0041) →                                              |
| Sth-2-3   | NZ_AAGS01000009.1 | - | 19372   | 19298   | PurD (COG0151) → RNA → PurE (COG0041) →                                              |
| Sag-2-3   | NC_004116.1       | + | 1960019 | 1960092 | ←hypo RNA → COG1247 (COG1247) →                                                      |
| Sag-8-2   | NC_004368.1       | + | 2034313 | 2034386 | ←hypo RNA → COG1247 (COG1247) →                                                      |
| Sag-1-3   | NZ_AAJO01000111.1 | + | 187     | 260     | RNA → COG1247 (COG1247) →                                                            |
| Sag-1-4   | NZ_AAJO01000170.1 | - | 323     | 250     | ←hypo (cons) RNA →                                                                   |
| Sag-1-5   | NZ_AAJO01000315.1 | + | 351     | 424     | ←hypo (cons) RNA → COG1247 (COG1247) →                                               |
| Sag-3-2   | NZ_AAJP01000002.1 | + | 34862   | 34935   | ←hypo (cons) RNA → COG1247 (COG1247) →                                               |
| Ssu-1-13  | NZ_AAF02000084.1  | - | 3841    | 3765    | CarA (COG0505) → RNA → MGS_CPS_II (cd01424) CarB (COG0458) CPSase.L_D3 (pfam02787) → |
| Ssu-1-14  | NZ_AAF02000084.1  | - | 5430    | 5354    | PyrB (COG0540) → RNA → CarA (COG0505) →                                              |
| Sth-3-4   | NC_006448.1       | + | 494669  | 494743  | PyrR (COG2065) → RNA → UraA (COG2233) →                                              |
| Sth-1-4   | NC_006449.1       | + | 489857  | 489931  | PyrR (COG2065) → RNA → UraA (COG2233) →                                              |
| Sth-2-4   | NZ_AAGS01000019.1 | + | 23952   | 24027   | PyrR (COG2065) → RNA → UraA (COG2233) →                                              |
| Sth-3-5   | NC_006448.1       | - | 1434137 | 1434063 | DUF143 (pfam02410) → RNA → UbiE (COG2226) →                                          |
| Sth-2-5   | NZ_AAGS01000030.1 | + | 485     | 559     | DUF143 (pfam02410) → RNA → UbiE (COG2226) →                                          |
| Sth-1-5   | NC_006449.1       | - | 1441782 | 1441708 | DUF143 (pfam02410) → RNA → UbiE (COG2226) →                                          |
| Smu-1-26  | NC_004350.1       | - | 1892977 | 1892902 | 30S ribosomal protein S10 → RNA → Ribosomal_L3 (pfam00297) →                         |
| Sth-3-6   | NC_006448.1       | + | 559043  | 559119  | TOP2c (smart00433) → RNA → GyrA (COG0188) →                                          |
| Sth-1-6   | NC_006449.1       | + | 554227  | 554303  | TOP2c (smart00433) → RNA → GyrA (COG0188) →                                          |

|          |                   |   |         |         |                                                                                      |
|----------|-------------------|---|---------|---------|--------------------------------------------------------------------------------------|
| Smu-1-27 | NC_004350.1       | + | 85544   | 85617   | GrpE (cd00446) → RNA → HSP70 (pfam00012) →                                           |
| Spn-2-28 | NC_003028.1       | + | 1527833 | 1527908 | ← Cad (pfam03596) RNA → ← Ribosomal_S15p_S13e (cd00353)                              |
| Spn-1-13 | NC_003098.1       | + | 1449240 | 1449315 | ← Cad (pfam03596) RNA → ← Ribosomal_S15p_S13e (cd00353)                              |
| Spn-2-29 | NZ_AAGY02000066.1 | + | 1022    | 1097    | ← Cad (pfam03596) RNA → ← Ribosomal_S15p_S13e (cd00353)                              |
| Spn-2-30 | NC_003028.1       | + | 557695  | 557770  | ← hypo RNA → Pnp (COG1185) →                                                         |
| Spn-1-14 | NC_003098.1       | + | 515543  | 515618  | MTHFR (cd00537) → RNA → Pnp (COG1185) →                                              |
| Spn-2-31 | NZ_AAGY02000055.1 | - | 7600    | 7525    | MTHFR (cd00537) → RNA → Pnp (COG1185) →                                              |
| Spn-2-32 | NC_003028.1       | - | 248220  | 248147  | ← FusA (COG0480) RNA → ← RpsG (COG0049)                                              |
| Spn-2-33 | NZ_AAGY02000014.1 | + | 9253    | 9326    | ← FusA (COG0480) RNA → ← RpsG (COG0049)                                              |
| Spn-1-15 | NC_003098.1       | - | 248677  | 248604  | ← FusA (COG0480) RNA → ← RpsG (COG0049)                                              |
| Smu-1-28 | NC_004350.1       | + | 807440  | 807512  | CarA (COG0505) → RNA → MGS_CPS_II (cd01424) CarB (COG0458) CPSase_L_D3 (pfam02787) → |
| Ssu-1-15 | NZ_AAFA02000011.1 | + | 28171   | 28244   | hypo (cons) → RNA → ThrS (COG0441) TGS (pfam02824) →                                 |
| Smu-1-29 | NC_004350.1       | - | 869469  | 869388  | ← GdhA (COG0334) RNA → hypo →                                                        |
| Smu-1-30 | NC_004350.1       | + | 745037  | 745110  | ← hypo RNA → ← COG5496 (COG5496)                                                     |
| Spn-2-34 | NC_003028.1       | - | 248105  | 248030  | ← FusA (COG0480) RNA → ← RpsG (COG0049)                                              |
| Spn-1-16 | NC_003098.1       | - | 248562  | 248487  | ← FusA (COG0480) RNA → ← RpsG (COG0049)                                              |
| Spn-2-35 | NZ_AAGY02000014.1 | + | 9368    | 9443    | ← FusA (COG0480) RNA → ← RpsG (COG0049)                                              |
| Sth-3-7  | NC_006448.1       | + | 498504  | 498579  | CarA (COG0505) → RNA → CarB (COG0458) CPSase_L_D3 (pfam02787) MGS_CPS_II (cd01424) → |
| Sth-2-6  | NZ_AAGS01000019.1 | + | 27788   | 27863   | CarA (COG0505) → RNA → CarB (COG0458) CPSase_L_D3 (pfam02787) MGS_CPS_II (cd01424) → |
| Spn-2-36 | NC_003028.1       | + | 800607  | 800679  | hypo → RNA → GyrA (COG0188) →                                                        |
| Spn-1-17 | NC_003098.1       | + | 752159  | 752231  | TOP2c (smart00433) → RNA → GyrA (COG0188) →                                          |
| Spn-2-37 | NZ_AAGY02000058.1 | + | 3061    | 3133    | TOP2c (smart00433) → RNA → GyrA (COG0188) →                                          |
| Smu-1-31 | NC_004350.1       | + | 87911   | 87986   | HSP70 (pfam00012) → RNA → DnaJ (COG0484) →                                           |
| Sth-3-8  | NC_006448.1       | + | 125360  | 125435  | DnaK (COG0443) → RNA → DnaJ (COG0484) →                                              |
| Sth-1-7  | NC_006449.1       | + | 125387  | 125462  | DnaK (COG0443) → RNA → DnaJ (COG0484) →                                              |
| Sth-2-7  | NZ_AAGS01000005.1 | + | 51195   | 51270   | DnaK (COG0443) → RNA → DnaJ (COG0484) →                                              |
| Spn-2-38 | NC_003028.1       | - | 1099198 | 1099122 | AcoB (COG0022) → RNA → AceF (COG0508) →                                              |
| Spn-1-18 | NC_003098.1       | - | 1045178 | 1045102 | AcoB (COG0022) → RNA → AceF (COG0508) →                                              |
| Spn-2-39 | NZ_AAGY02000015.1 | + | 9437    | 9513    | AcoB (COG0022) → RNA → AceF (COG0508) →                                              |
| Smu-1-32 | NC_004350.1       | + | 841975  | 842048  | GalT (COG4468) → RNA → GalE (COG1087) →                                              |
| Sth-3-9  | NC_006448.1       | - | 938799  | 938726  | AceF (COG0508) → RNA → Biotin_lipoyl (pfam00364) Lpd (COG1249) →                     |
| Smu-1-33 | NC_004350.1       | + | 609025  | 609098  | COG4894 (COG4894) → RNA → tRNA-synt_2c (pfam01411) DHHA1 (pfam02272) →               |
| Spn-2-40 | NC_003028.1       | + | 200081  | 200156  | ← hypo RNA → Ribosomal_S8 (pfam00410) →                                              |
| Spn-2-41 | NZ_AAGY02000002.1 | + | 22906   | 22831   | Ribosomal_S14 (pfam00253) → RNA → Ribosomal_S8 (pfam00410) →                         |
| Spn-1-19 | NC_003098.1       | + | 202591  | 202666  | Ribosomal_S14 (pfam00253) → RNA → Ribosomal_S8 (pfam00410) →                         |
| Lla-1-1  | NC_002662.1       | - | 735311  | 735237  | MhpC (COG0596) → RNA → MenB (COG0447) →                                              |
| Spn-2-42 | NC_003028.1       | - | 1466677 | 1466605 | hypo → RNA → hypo →                                                                  |
| Spn-1-20 | NC_003098.1       | - | 1402123 | 1402051 | DegV (COG1307) → RNA → DapB (COG0289) →                                              |
| Spn-2-43 | NZ_AAGY02000009.1 | - | 12519   | 12447   | DegV (COG1307) → RNA → DapB (COG0289) →                                              |



**cd00001** PTS\_IIB, PTS system, Mannose/sorbose specific IIB subunit.

**cd00353** Ribosomal protein S15 (prokaryotic)\_S13 (eukaryotic) binds the central domain of 16S rRNA and is required for assembly of the small ribosomal subunit and for intersubunit association, thus representing a key element in the assembly of the whole ribosome.

**cd00446** GrpE is the adenine nucleotide exchange factor of DnaK (Hsp70)-type ATPases.

**cd00520** Ribosome recycling factor (RRF).

**cd00537** Methylene tetrahydrofolate reductase (MTHFR).

**cd00738** Class II Glycyl-tRNA synthetase (GlyRS) alpha subunit core catalytic domain.

**cd01360** Adenylsuccinate lyase\_1: Adenylsuccinate lyase (ASL)\_subgroup 1.

**cd01424** Methylglyoxal synthase-like domain from type II glutamine-dependent carbamoyl phosphate synthetase (CSP).

**cd01570** Nicotinate phosphoribosyltransferase (NAPRTase), subgroup A.

**cd01748** Type 1 glutamine amidotransferase (GATase1) domain found in imidazole glycerol phosphate synthase (IGPS). [(5'-phosphoribulosyl)-formimino]

**COG0005** Purine nucleoside phosphorylase [Nucleotide transport and metabolism]

**COG0022** Pyruvate/2-oxoglutarate dehydrogenase complex, dehydrogenase (E1) component, eukaryotic type, beta subunit [Energy production and conversion]

**COG0041** Phosphoribosylcarboxyaminoimidazole (NCAIR) mutase [Nucleotide transport and metabolism]

**COG0049** Ribosomal protein S7 [Translation, ribosomal structure and biogenesis]

**COG0051** Ribosomal protein S10 [Translation, ribosomal structure and biogenesis]

**COG0060** Isoleucyl-tRNA synthetase [Translation, ribosomal structure and biogenesis]

**COG0085** DNA-directed RNA polymerase, beta subunit/140 kD subunit [Transcription]

**COG0097** Ribosomal protein L6P/L9E [Translation, ribosomal structure and biogenesis]

**COG0106** Phosphoribosylformimino-5-aminoimidazole carboxamide ribonucleotide (ProFAR) isomerase [Amino acid transport and metabolism]

**COG0150** Phosphoribosylaminoimidazole (AIR) synthetase [Nucleotide transport and metabolism]

**COG0151** Phosphoribosylamine-glycine ligase [Nucleotide transport and metabolism]

**COG0158** Type IIA topoisomerase (DNA gyrase/topo II, topoisomerase IV), A subunit [DNA replication, recombination, and repair]

**COG0199** Ribosomal protein S14 [Translation, ribosomal structure and biogenesis]

**COG0216** Protein chain release factor A [Translation, ribosomal structure and biogenesis]

**COG0266** Formamidopyrimidine-DNA glycosylase [DNA replication, recombination, and repair]

**COG0289** Dihydrodipicolinate reductase [Amino acid transport and metabolism]

**COG0334** Glutamate dehydrogenase/leucine dehydrogenase [Amino acid transport and metabolism]

**COG0441** Threonyl-tRNA synthetase [Translation, ribosomal structure and biogenesis]

**COG0442** Prolyl-tRNA synthetase [Translation, ribosomal structure and biogenesis]

**COG0443** Molecular chaperone [Posttranslational modification, protein turnover, chaperones]

**COG0447** Dihydroxynaphthoic acid synthase [Coenzyme metabolism]

**COG0458** Carbamoylphosphate synthase large subunit (split gene in MJ) [Amino acid transport and metabolism / Nucleotide transport and metabolism]

**COG0461** Orotate phosphoribosyltransferase [Nucleotide transport and metabolism]

**COG0480** Translation elongation factors (GTPases) [Translation, ribosomal structure and biogenesis]

**COG0484** DnaJ-class molecular chaperone with C-terminal Zn finger domain [Posttranslational modification, protein turnover, chaperones]

**COG0492** Thioredoxin reductase [Posttranslational modification, protein turnover, chaperones]

**COG0505** Carbamoylphosphate synthase small subunit [Amino acid transport and metabolism / Nucleotide transport and metabolism]

**COG0508** Pyruvate/2-oxoglutarate dehydrogenase complex, dihydrolipoamide acyltransferase (E2) component, and related enzymes [Energy production and conversion]

**COG0528** Uridylate kinase [Nucleotide transport and metabolism]

**COG0538** Isocitrate dehydrogenases [Energy production and conversion]

**COG0540** Aspartate carbamoyltransferase, catalytic chain [Nucleotide transport and metabolism]

**COG0596** Predicted hydrolases or acyltransferases (alpha/beta hydrolase superfamily) [General function prediction only]

**COG0744** Membrane carboxypeptidase (penicillin-binding protein) [Cell envelope biogenesis, outer membrane]

**COG0750** Predicted membrane-associated Zn-dependent proteases 1 [Cell envelope biogenesis, outer membrane]

**COG0751** Glycyl-tRNA synthetase, beta subunit [Translation, ribosomal structure and biogenesis]

**COG0813** Purine-nucleoside phosphorylase [Nucleotide transport and metabolism]

**COG1087** UDP-glucose 4-epimerase [Cell envelope biogenesis, outer membrane]

**COG1088** dTDP-D-glucose 4,6-dehydratase [Cell envelope biogenesis, outer membrane]

**COG1159** GTPase [General function prediction only]

**COG1185** Polyribonucleotide nucleotidyltransferase (polynucleotide phosphorylase) [Translation, ribosomal structure and biogenesis]

**COG1247** Sortase and related acyltransferases [Cell envelope biogenesis, outer mem-

brane]

**COG1249** Pyruvate/2-oxoglutarate dehydrogenase complex, dihydrolipoamide dehydrogenase (E3) component, and related enzymes [Energy production and conversion]

**COG1307** Uncharacterized protein conserved in bacteria [Function unknown]

**COG1435** Thymidine kinase [Nucleotide transport and metabolism]

**COG1473** Metal-dependent amidase/aminoacylase/carboxypeptidase [General function prediction only]

**COG1481** Uncharacterized protein conserved in bacteria [Function unknown]

**COG1881** Phospholipid-binding protein [General function prediction only]

**COG1898** dTDP-4-dehydrorhamnose 3,5-epimerase and related enzymes [Cell envelope biogenesis, outer membrane]

**COG2065** Pyrimidine operon attenuation protein/uracil phosphoribosyltransferase [Nucleotide transport and metabolism]

**COG2171** Tetrahydrodipicolinate N-succinyltransferase [Amino acid transport and metabolism]

**COG2226** Methylase involved in ubiquinone/menaquinone biosynthesis [Coenzyme metabolism]

**COG2233** Xanthine/uracil permeases [Nucleotide transport and metabolism]

**COG3064** Membrane protein involved in colicin uptake [Cell envelope biogenesis, outer membrane]

**COG3942** Surface antigen [General function prediction only]

**COG4468** Galactose-1-phosphate uridylyltransferase [Carbohydrate transport and metabolism]

**COG4891** Uncharacterized conserved protein [Function unknown]

**COG5280** Phage-related minor tail protein [Function unknown]

**COG5340** Predicted transcriptional regulator [Transcription]

**COG5412** Phage-related protein [Function unknown]

**COG5496** Predicted thioesterase [General function prediction only]

**pfam00012** Hsp70 protein.

**pfam00253** Ribosomal protein S14p/S29e.

**pfam00293** NUDIX domain.

**pfam00297** Ribosomal protein L3.

**pfam00318** Ribosomal protein S2.

**pfam00364** Biotin-requiring enzyme.

**pfam00410** Ribosomal protein S8.

**pfam00551** Formyl transferase.

**pfam00583** Acetyltransferase (GNAT) family.

**pfam00889** Elongation factor TS.

**pfam01411** tRNA synthetases class II (A).

**pfam01609** Transposase DDE domain.

**pfam01808** AICARFT/IMPCHase bienzyme.

**pfam02142** MGS-like domain.

**pfam02272** DHHA1 domain.

**pfam02410** Domain of unknown function DUF143.

**pfam02787** Carbamoyl-phosphate synthetase large chain, oligomerisation domain.

**pfam02824** TGS domain.

**pfam03577** Peptidase family U34.

**pfam03596** Cadmium resistance transporter.

**pfam03609** PTS system sorbose-specific iic component.

**pfam06325** Ribosomal protein L11 methyltransferase (PrmA).

**pfam06519** TolA protein.

**pfam06541** Protein of unknown function (DUF1113).

**smart00342** helix\_turn\_helix, arabinose operon control protein;

**smart00888** TopoisomeraseII; Eukaryotic DNA topoisomerase II, GyrB, ParE

Duplicate sequences: the following putative homologs are not shown in the alignment because their sequences are identical to a homolog already shown: Sag-1-1, Sag-1-2, Sag-1-3, Sag-1-4, Sag-1-5, Sag-3-1, Sag-3-2, Sag-5-1, Sag-5-2, Sag-7-1, Sag-7-2, Sag-8-1, Sag-8-2, Smu-1-12, Smu-1-5, Smu-1-6, Smu-1-7, Smu-1-8, Spn-1-1, Spn-1-10, Spn-1-11, Spn-1-13, Spn-1-14, Spn-1-16, Spn-1-17, Spn-1-18, Spn-1-2, Spn-1-20, Spn-1-3, Spn-1-5, Spn-1-6, Spn-1-8, Spn-1-9, Spn-2-10, Spn-2-12, Spn-2-14, Spn-2-16, Spn-2-17, Spn-2-19, Spn-2-2, Spn-2-21, Spn-2-23, Spn-2-25, Spn-2-27, Spn-2-29, Spn-2-31, Spn-2-33, Spn-2-35, Spn-2-37, Spn-2-39, Spn-2-4, Spn-2-41, Spn-2-43, Spn-2-6, Spn-2-8, Spy-1-1, Spy-1-10, Spy-1-11, Spy-1-12, Spy-1-13, Spy-1-14, Spy-1-15, Spy-1-16, Spy-1-17, Spy-1-2, Spy-1-3, Spy-1-4, Spy-1-5, Spy-1-6, Spy-1-7, Spy-1-8, Spy-1-9, Spy-10-10, Spy-10-13, Spy-10-14, Spy-10-15, Spy-10-16, Spy-10-17, Spy-10-18, Spy-10-2, Spy-10-3, Spy-10-4, Spy-10-5, Spy-10-6, Spy-10-7, Spy-11-1, Spy-11-10, Spy-11-12, Spy-11-13, Spy-11-15, Spy-11-16, Spy-11-17, Spy-11-18, Spy-11-2, Spy-11-3, Spy-11-4, Spy-11-5, Spy-11-6, Spy-11-7, Spy-11-8, Spy-11-9, Spy-12-1, Spy-12-10, Spy-12-12, Spy-12-14, Spy-12-15, Spy-12-16, Spy-12-2, Spy-12-3, Spy-12-4, Spy-12-5, Spy-12-6, Spy-12-7, Spy-12-8, Spy-12-9, Spy-2-1, Spy-2-10, Spy-2-4, Spy-2-5, Spy-2-6, Spy-2-8, Spy-2-9, Spy-3-1, Spy-3-10, Spy-3-11, Spy-3-12, Spy-3-13, Spy-3-14, Spy-3-15, Spy-3-16, Spy-3-2, Spy-3-3, Spy-3-4, Spy-3-5, Spy-3-7, Spy-3-8, Spy-4-2, Spy-4-3, Spy-4-4, Spy-4-5, Spy-4-6, Spy-5-1, Spy-5-10, Spy-5-12, Spy-5-13, Spy-5-14, Spy-5-15, Spy-5-16, Spy-5-17, Spy-5-18, Spy-5-19, Spy-5-2, Spy-5-3, Spy-5-4, Spy-5-5, Spy-5-7, Spy-5-9, Spy-6-1, Spy-6-10, Spy-6-11, Spy-6-12, Spy-6-13, Spy-6-14, Spy-6-15, Spy-6-16, Spy-6-17,







<sup>1</sup> Overlaps the reverse complement of a putative homolog in the TD-2 motif

**abbrev. of hits taxonomy of species**

Tde-1-1 to Tde-1-29 Bacteria Spirochaetes Spirochaetales Spirochaetaceae *Treponema denticola* ATCC 35405

| abbrev                | RefSeq accession | 5' at | 3' at           | genes                                                                                                                                                                                                                 |
|-----------------------|------------------|-------|-----------------|-----------------------------------------------------------------------------------------------------------------------------------------------------------------------------------------------------------------------|
| <sup>1</sup> Tde-1-1  | NC_002967.9      | -     | 72871 72748     | RNA → PfkA (COG0205) →                                                                                                                                                                                                |
| Tde-1-2               | NC_002967.9      | -     | 2425623 2425496 | RNA → 60KD_IMP (pfam02096) →                                                                                                                                                                                          |
| Tde-1-3               | NC_002967.9      | -     | 1987259 1987128 | RNA → DNA polymerase III domain protein → NtrY (COG5000) → AtoC (COG2204) → FtsJ (COG0293) →                                                                                                                          |
| Tde-1-4               | NC_002967.9      | -     | 2522242 2522121 | RNA → hypo → MA (smart00283) →                                                                                                                                                                                        |
| Tde-1-5               | NC_002967.9      | -     | 2422749 2422628 | RNA → ←hypo                                                                                                                                                                                                           |
| <sup>1</sup> Tde-1-6  | NC_002967.9      | -     | 2121240 2121118 | RNA → hypo →                                                                                                                                                                                                          |
| <sup>1</sup> Tde-1-7  | NC_002967.9      | -     | 678502 678381   | RNA → UdpNAET (cd01555) →                                                                                                                                                                                             |
| Tde-1-8               | NC_002967.9      | +     | 1560665 1560785 | RNA → SalY (COG0577) → LolE (COG4591) → ABC_MJ0796_Lo1CDE_FtsE (cd03255) → COG4939 (COG4939) →<br>LolE (COG4591) →                                                                                                    |
| Tde-1-9               | NC_002967.9      | -     | 1749446 1749325 | RNA → hypo → hypo →                                                                                                                                                                                                   |
| Tde-1-10              | NC_002967.9      | +     | 1922427 1922548 | RNA → ←hypo                                                                                                                                                                                                           |
| Tde-1-11              | NC_002967.9      | -     | 2824639 2824515 | RNA → Flg_hook (pfam02120) → FlgD (COG1843) → FlgE (COG1749) → FlbD (pfam06289) → MotA (COG1291) →<br>MotB (COG1360) → FliL (pfam03748) → FliM (COG1868) → CheC (COG1776) FliN (COG1886) → hypo →<br>FliP (COG1338) → |
| Tde-1-12              | NC_002967.9      | -     | 1361831 1361708 | RNA → COG4254 (COG4254) →                                                                                                                                                                                             |
| Tde-1-13              | NC_002967.9      | +     | 779849 779975   | RNA → TRX_family (cd02947) →                                                                                                                                                                                          |
| <sup>1</sup> Tde-1-14 | NC_002967.9      | +     | 568504 568630   | RNA → hypo →                                                                                                                                                                                                          |
| Tde-1-15              | NC_002967.9      | -     | 1631980 1631857 | RNA → GlgA (COG0297) → hypo → hypo → COG1293 (COG1293) →                                                                                                                                                              |
| Tde-1-16              | NC_002967.9      | -     | 2507946 2507818 | RNA → hypo → COG1512 (COG1512) →                                                                                                                                                                                      |
| <sup>1</sup> Tde-1-17 | NC_002967.9      | -     | 1933322 1933202 | RNA → COG1979 (COG1979) → RuvB (COG2255) →                                                                                                                                                                            |
| Tde-1-18              | NC_002967.9      | -     | 2040778 2040650 | RNA → hypo → lipoprotein, putative →                                                                                                                                                                                  |
| <sup>1</sup> Tde-1-19 | NC_002967.9      | -     | 2423681 2423553 | RNA → Jag (COG1847) →                                                                                                                                                                                                 |
| Tde-1-20              | NC_002967.9      | -     | 630085 629955   | RNA → AccD (COG0777) → AccA (COG0825) →                                                                                                                                                                               |
| Tde-1-21              | NC_002967.9      | +     | 293260 293387   | RNA → MarR (pfam01047) → WrbA (COG0655) COG1146 (COG1146) → FldA (COG0716) →                                                                                                                                          |
| Tde-1-22              | NC_002967.9      | -     | 2548186 2548056 | RNA → hypo →                                                                                                                                                                                                          |
| Tde-1-23              | NC_002967.9      | -     | 2444069 2443941 | RNA → STE14 (COG2020) → COG3467 (COG3467) → hypo → hypo → hypo → hypo →<br>acetyltransferase, GNAT family →                                                                                                           |
| Tde-1-24              | NC_002967.9      | -     | 551054 550941   | RNA → hypo → HipA (COG3550) →                                                                                                                                                                                         |
| <sup>1</sup> Tde-1-25 | NC_002967.9      | +     | 1992272 1992465 | RNA → hypo →                                                                                                                                                                                                          |
| Tde-1-26              | NC_002967.9      | +     | 2264813 2265000 | RNA → hypo → FcbC (COG0824) → AdcA (cd01017) → DUF1361 (pfam07099) →                                                                                                                                                  |
| Tde-1-27              | NC_002967.9      | +     | 729883 730072   | RNA → ThiD (COG0351) →                                                                                                                                                                                                |
| Tde-1-28              | NC_002967.9      | +     | 1163353 1163547 | RNA → hypo → Chorismate_synt (pfam01264) →                                                                                                                                                                            |
| Tde-1-29              | NC_002967.9      | -     | 1229988 1229789 | RNA → COG1505 (COG1505) →                                                                                                                                                                                             |

cd01017 Metal binding protein AcdA.

cd01555 UDP-N-acetylglucosamine enolpyruvyl transferase catalyzes enolpyruvyl transfer as part of the first step in the biosynthesis of peptidoglycan, a component

of the bacterial cell wall.

cd02947 TRX family; composed of two groups: Group I, which includes proteins that exclusively encode a TRX domain; and Group II, which are composed of fusion proteins

of TRX and additional domains.

**cd03255** This family is comprised of MJ0796 ATP-binding cassette, macrolide-specific ABC-type efflux carrier (MacAB), and proteins involved in cell division (FtsE) and release of lipoproteins from the cytoplasmic membrane (LolCDE).

**COG0205** 6-phosphofructokinase [Carbohydrate transport and metabolism]

**COG0293** 23S rRNA methylase [Translation, ribosomal structure and biogenesis]

**COG0297** Glycogen synthase [Carbohydrate transport and metabolism]

**COG0351** Hydroxymethylpyrimidine/phosphomethylpyrimidine kinase [Coenzyme metabolism]

**COG0577** ABC-type antimicrobial peptide transport system, permease component [Defense mechanisms]

**COG0655** Multimeric flavodoxin WrbA [General function prediction only]

**COG0716** Flavodoxins [Energy production and conversion]

**COG0777** Acetyl-CoA carboxylase beta subunit [Lipid metabolism]

**COG0824** Predicted thioesterase [General function prediction only]

**COG0825** Acetyl-CoA carboxylase alpha subunit [Lipid metabolism]

**COG1146** Ferredoxin [Energy production and conversion]

**COG1291** Flagellar motor component [Cell motility and secretion]

**COG1293** Predicted RNA-binding protein homologous to eukaryotic snRNP [Transcription]

**COG1338** Flagellar biosynthesis pathway, component FlIP [Cell motility and secretion / Intracellular trafficking and secretion]

**COG1360** Flagellar motor protein [Cell motility and secretion]

**COG1505** Serine proteases of the peptidase family S9A [Amino acid transport and metabolism]

**COG1512** Beta-propeller domains of methanol dehydrogenase type [General function prediction only]

**COG1749** Flagellar hook protein FlgE [Cell motility and secretion]

**COG1776** Chemotaxis protein CheC, inhibitor of MCP methylation [Cell motility and secretion / Signal transduction mechanisms]

**COG1843** Flagellar hook capping protein [Cell motility and secretion]

**COG1847** Predicted RNA-binding protein [General function prediction only]

**COG1868** Flagellar motor switch protein [Cell motility and secretion]

**COG1886** Flagellar motor switch/type III secretory pathway protein [Cell motility and secretion / Intracellular trafficking and secretion]

**COG1979** Uncharacterized oxidoreductases, Fe-dependent alcohol dehydrogenase family [Energy production and conversion]

**COG2020** Putative protein-S-isoprenylcysteine methyltransferase [Posttranslational modification, protein turnover, chaperones]

**COG2204** Response regulator containing CheY-like receiver, AAA-type ATPase, and DNA-binding domains [Signal transduction mechanisms]

**COG2255** Holliday junction resolvosome, helicase subunit [DNA replication, recombination, and repair]

**COG3467** Predicted flavin-nucleotide-binding protein [General function prediction only]

**COG3550** Uncharacterized protein related to capsule biosynthesis enzymes [General function prediction only]

**COG4254** Uncharacterized protein conserved in bacteria [Function unknown]

**COG4591** ABC-type transport system, involved in lipoprotein release, permease component [Cell envelope biogenesis, outer membrane]

**COG4939** Major membrane immunogen, membrane-anchored lipoprotein [Function unknown]

**COG5000** Signal transduction histidine kinase involved in nitrogen fixation and metabolism regulation [Signal transduction mechanisms]

**pfam01047** MarR family.

**pfam01264** Chorismate synthase.

**pfam02096** 60Kd inner membrane protein.

**pfam02120** Flagellar hook-length control protein.

**pfam03748** Flagellar basal body-associated protein FlIL.

**pfam06289** Flagellar protein (FlbD).

**pfam07099** Protein of unknown function (DUF1361).

**smart00283** Methyl-accepting chemotaxis-like domains (chemotaxis sensory transducer).







**abbrev. of hits taxonomy of species**

Tde-1-1 to Tde-1-36 Bacteria Spirochaetes Spirochaetales Spirochaetaceae *Treponema denticola* ATCC 35405

| abbrev                 | RefSeq accession |   | 5' at   | 3' at   | genes                                                                                                                       |
|------------------------|------------------|---|---------|---------|-----------------------------------------------------------------------------------------------------------------------------|
| <sup>6</sup> Tde-1-1   | NC_002967.9      | + | 72799   | 72905   | hypo→ ←PfkA (COG0205) RNA→ ←DUF192 (pfam02643) ←hypo                                                                        |
| <sup>6</sup> Tde-1-2   | NC_002967.9      | + | 678433  | 678536  | ←Cache (pfam02743)MA (smart00283)HAMP (smart00304) ←UdpNAET (cd01555) RNA→<br>←E_set_proteins_like (cd02861) ←PTH (cd00462) |
| <sup>3,6</sup> Tde-1-3 | NC_002967.9      | + | 2121169 | 2121274 | ←hypo ←hypo RNA→ ←hypo AmpC (COG1680)→                                                                                      |
| <sup>3,6</sup> Tde-1-4 | NC_002967.9      | - | 1992344 | 1992238 | hypo→ hypo→ RNA→ hypo→ hypo→                                                                                                |
| <sup>6</sup> Tde-1-5   | NC_002967.9      | + | 2423609 | 2423715 | ←hypo ←Jag (COG1847) RNA→ ←60KD_IMP (pfam02096) ←hypo                                                                       |
| <sup>6</sup> Tde-1-6   | NC_002967.9      | - | 568579  | 568470  | hypo→ ←hypo RNA→ PnbA (COG2272)→ SMI1 (COG4282)→                                                                            |
| <sup>6</sup> Tde-1-7   | NC_002967.9      | + | 1933247 | 1933356 | ←RuvB (COG2255) ←COG1979 (COG1979) RNA→ ←GlpK (COG0554)<br>←SpsF (COG1861)UbiG (COG2227)spsG (COG3980)                      |
| Tde-1-8                | NC_002967.9      | - | 1000082 | 999985  | ←DUF323 (pfam03781) ←hypo RNA→ ←hypo ←hypo                                                                                  |
| Tde-1-9                | NC_002967.9      | - | 599658  | 599561  | ←hypo ←hypo RNA→ ←hypo ←hypo                                                                                                |
| Tde-1-10               | NC_002967.9      | - | 1953077 | 1952980 | ←hypo ←hypo RNA→ hypo→ hypo→                                                                                                |
| Tde-1-11               | NC_002967.9      | + | 843599  | 843700  | ←MdlB (COG1132) ←MdlB (COG1132) RNA→ ←AcrR (COG1309) hypo→                                                                  |
| Tde-1-12               | NC_002967.9      | - | 1911156 | 1911055 | ←hypo ←hypo RNA→ Branch_AA_trans (pfam05525)→ DUF583 (pfam04519)→                                                           |
| Tde-1-13               | NC_002967.9      | + | 1129831 | 1129931 | COG3330 (COG3330)→ COG1543 (COG1543)→ RNA→ Ala_racemase (cd00430)→ LYTB (pfam02401)→                                        |
| Tde-1-14               | NC_002967.9      | + | 1075188 | 1075287 | Ribosomal_S12 (cd03368)→ RpsG (COG0049)→ RNA→ FusA (COG0480)→ hypo→                                                         |
| Tde-1-15               | NC_002967.9      | - | 2164499 | 2164393 | ←hypo ←hypo RNA→ CbiQ (pfam02361)→ ABC_cobalt_transport_domain1 (cd03225)→                                                  |
| <sup>2</sup> Tde-1-16  | NC_002967.9      | + | 2573259 | 2573364 | ←COG1284 (COG1284) hypo→ RNA→ Cache (pfam02743)MA (smart00283)HAMP (smart00304)→<br>←COG1451 (COG1451)                      |
| <sup>4</sup> Tde-1-17  | NC_002967.9      | + | 2276539 | 2276644 | ←COG4865 (COG4865) ←hypo RNA→ ←DUF323 (pfam03781) ←hypo                                                                     |
| Tde-1-18               | NC_002967.9      | - | 1086059 | 1085954 | hypo→ hypo→ RNA→ ←DUF323 (pfam03781) NorM (COG0534)→                                                                        |
| <sup>4</sup> Tde-1-19  | NC_002967.9      | + | 2125442 | 2125546 | ←hypo hypo→ RNA→ ←DUF323 (pfam03781) ←hypo                                                                                  |
| Tde-1-20               | NC_002967.9      | + | 2374805 | 2374908 | Peptidase_M29 (pfam02073)→ ←hypo RNA→ LeuS (COG0495)→ ←COG3976 (COG3976)                                                    |
| Tde-1-21               | NC_002967.9      | + | 854281  | 854383  | hypo→ DUF323 (pfam03781)→ RNA→ ←RnfA (COG4657) ←RnfE (COG4660)                                                              |
| <sup>5</sup> Tde-1-22  | NC_002967.9      | + | 1941707 | 1941805 | ←hypo ←hypo RNA→ ←hypo SlpA (COG1047)→                                                                                      |
| Tde-1-23               | NC_002967.9      | + | 1084708 | 1084807 | MA (smart00283)→ ←NorM (COG0534) RNA→ DUF323 (pfam03781)→ ←hypo                                                             |
| Tde-1-24               | NC_002967.9      | - | 2302899 | 2302794 | HRDC (pfam00570)→ RVT (pfam00078)→ RNA→ ←hypo MdlB (COG1132)→                                                               |
| Tde-1-25               | NC_002967.9      | + | 994718  | 994821  | ←EFP (pfam01132) Prc (COG0793)→ RNA→ hypo→ ArgS (COG0018)→                                                                  |
| Tde-1-26               | NC_002967.9      | - | 2164591 | 2164489 | ←hypo ←hypo RNA→ CbiQ (pfam02361)→ ABC_cobalt_transport_domain1 (cd03225)→                                                  |
| <sup>4</sup> Tde-1-27  | NC_002967.9      | - | 1952896 | 1952794 | ←hypo ←hypo RNA→ hypo→ hypo→                                                                                                |
| Tde-1-28               | NC_002967.9      | - | 1952985 | 1952892 | ←hypo ←hypo RNA→ hypo→ hypo→                                                                                                |
| Tde-1-29               | NC_002967.9      | - | 1875793 | 1875692 | hypo→ ←hypo RNA→ hypo→ hypo→                                                                                                |
| Tde-1-30               | NC_002967.9      | + | 1660531 | 1660631 | ←VapI (COG3093) Mug (COG3663)→ RNA→ Upp (COG0035)→ TPR (cd00189)→                                                           |
| Tde-1-31               | NC_002967.9      | + | 2540940 | 2541042 | GidB (COG0357)→ ←COG2129 (COG2129) RNA→ ←DUF323 (pfam03781) hypo→                                                           |
| <sup>3</sup> Tde-1-32  | NC_002967.9      | - | 968502  | 968400  | hypo→ FusA (COG0480)→ RNA→ ←DUF323 (pfam03781) ←hypo                                                                        |
| Tde-1-33               | NC_002967.9      | - | 2512716 | 2512618 | COG1573 (COG1573)→ PriA (COG1198)→ RNA→ PrfA (COG0216)→ HemK (COG2890)→                                                     |
| Tde-1-34               | NC_002967.9      | + | 2770519 | 2770618 | hypo→ ←SpoU (COG0566) RNA→ ←DUF323 (pfam03781) hypo→                                                                        |
| Tde-1-35               | NC_002967.9      | - | 2516687 | 2516588 | ←hypo DUF323 (pfam03781)→ RNA→ hypo→ COG1573 (COG1573)→                                                                     |
| <sup>1</sup> Tde-1-36  | NC_002967.9      | + | 825321  | 825421  | ←COG1959 (COG1959) ←COG2910 (COG2910) RNA→ hypo→ ←UPF0027 (pfam01139)                                                       |

**cd00189** Tetratricopeptide repeat domain; typically contains 34 amino acids [WLF]-X(2)-[LIM]-[GAS]-X(2)-[YLF]-X(8)-[ASE]-X(3)-[FYL]-X(2)-[ASL]-X(4)-[PKE]

**cd00430** Alanine racemase.

**cd00462** Peptidyl-tRNA hydrolase (PTH) is a monomeric protein that cleaves the ester bond linking the nascent peptide and tRNA when peptidyl-tRNA is released prematurely from the ribosome.

**cd01555** UDP-N-acetylglucosamine enolpyruvyl transferase catalyzes enolpyruvyl transfer as part of the first step in the biosynthesis of peptidoglycan, a component of the bacterial cell wall.

**cd02861** E or "early" set-like proteins.

**cd03225** Domain I of the ATPase component of a cobalt transport family found in both bacteria and archaea.

**cd03368** S12-like family, 30S ribosomal protein S12 subfamily; S12 is located at the interface of the large and small ribosomal subunits of prokaryotes, chloroplasts and mitochondria, where it plays an important role in both tRNA and ribosomal subunit interactions.

**COG0018** Arginyl-tRNA synthetase [Translation, ribosomal structure and biogenesis]

**COG0035** Uracil phosphoribosyltransferase [Nucleotide transport and metabolism]

**COG0049** Ribosomal protein S7 [Translation, ribosomal structure and biogenesis]

**COG0205** 6-phosphofructokinase [Carbohydrate transport and metabolism]

**COG0216** Protein chain release factor A [Translation, ribosomal structure and biogenesis]

**COG0357** Predicted S-adenosylmethionine-dependent methyltransferase involved in bacterial cell division [Cell envelope biogenesis, outer membrane]

**COG0480** Translation elongation factors (GTPases) [Translation, ribosomal structure and biogenesis]

**COG0495** Leucyl-tRNA synthetase [Translation, ribosomal structure and biogenesis]

**COG0534** Na<sup>+</sup>-driven multidrug efflux pump [Defense mechanisms]

**COG0554** Glycerol kinase [Energy production and conversion]

**COG0566** rRNA methylases [Translation, ribosomal structure and biogenesis]

**COG0793** Periplasmic protease [Cell envelope biogenesis, outer membrane]

**COG1047** FKBP-type peptidyl-prolyl cis-trans isomerases 2 [Posttranslational modification, protein turnover, chaperones]

**COG1132** ABC-type multidrug transport system, ATPase and permease components [Defense mechanisms]

**COG1198** Primosomal protein N' (replication factor Y) - superfamily II helicase [DNA replication, recombination, and repair]

**COG1284** Uncharacterized conserved protein [Function unknown]

**COG1309** Transcriptional regulator [Transcription]

**COG1451** Predicted metal-dependent hydrolase [General function prediction only]

**COG1543** Uncharacterized conserved protein [Function unknown]

**COG1573** Uracil-DNA glycosylase [DNA replication, recombination, and repair]

**COG1680** Beta-lactamase class C and other penicillin binding proteins [Defense mechanisms]

**COG1847** Predicted RNA-binding protein [General function prediction only]

**COG1861** Spore coat polysaccharide biosynthesis protein F, CMP-KDO synthetase homolog [Cell envelope biogenesis, outer membrane]

**COG1959** Predicted transcriptional regulator [Transcription]

**COG1979** Uncharacterized oxidoreductases, Fe-dependent alcohol dehydrogenase family [Energy production and conversion]

**COG2129** Predicted phosphoesterases, related to the Icc protein [General function prediction only]

**COG2227** 2-polyprenyl-3-methyl-5-hydroxy-6-methoxy-1,4-benzoquinol methylase [Coenzyme metabolism]

**COG2255** Holliday junction resolvase, helicase subunit [DNA replication, recombination, and repair]

**COG2272** Carboxylesterase type B [Lipid metabolism]

**COG2890** Methylase of polypeptide chain release factors [Translation, ribosomal structure and biogenesis]

**COG2910** Putative NADH-flavin reductase [General function prediction only]

**COG3093** Plasmid maintenance system antidote protein [General function prediction only]

**COG3330** Uncharacterized protein conserved in bacteria [Function unknown]

**COG3663** G:T/U mismatch-specific DNA glycosylase [DNA replication, recombination, and repair]

**COG3976** Uncharacterized protein conserved in bacteria [Function unknown]

**COG3980** Spore coat polysaccharide biosynthesis protein, predicted glycosyltransferase [Cell envelope biogenesis, outer membrane]

**COG4282** Protein involved in beta-1,3-glucan synthesis [Carbohydrate transport and metabolism]

**COG4657** Predicted NADH:ubiquinone oxidoreductase, subunit RnfA [Energy production and conversion]

**COG4660** Predicted NADH:ubiquinone oxidoreductase, subunit RnfE [Energy production and conversion]

**COG4865** Glutamate mutase epsilon subunit [Amino acid transport and metabolism]

**pfam00078** Reverse transcriptase (RNA-dependent DNA polymerase).

**pfam00570** HRDC domain.

**pfam01132** Elongation factor P (EF-P).

**pfam01139** Uncharacterized protein family UPF0027.

**pfam02073** Thermophilic metalloprotease (M29).

**pfam02096** 60Kd inner membrane protein.



We presume that gamma-150, if a genuine structured RNA, is a regulatory RNAs. non-coding RNA, because the gene context is not typical of known *cis-*

Notes:

- <sup>1</sup> Genome annotation has overlapping gene, but this gene is hypothetical and does not have homologs in any other bacteria, according to BLAST.
- <sup>2</sup> This gene is  $\approx$  1.3 Kb from its downstream gene, according to the anno-

tation. However, there appears to be an unannotated Isovaleryl-CoA dehydrogenase gene in this region. (A translated BLAST query of this region returns a match to this gene, and includes the start codon, and no apparent premature stop.)

| abbrev. of hits    | taxonomy of species                                                                                                 |
|--------------------|---------------------------------------------------------------------------------------------------------------------|
| Avi-1-1 to Avi-1-2 | $\gamma$ -proteobacteria Pseudomonadales Pseudomonadaceae <i>Azotobacter vinelandii</i> AvOP                        |
| Pae-1-1 to Pae-1-1 | $\gamma$ -proteobacteria Pseudomonadales Pseudomonadaceae <i>Pseudomonas aeruginosa</i> 2192                        |
| Pae-2-1 to Pae-2-1 | $\gamma$ -proteobacteria Pseudomonadales Pseudomonadaceae <i>Pseudomonas aeruginosa</i> C3719                       |
| Pae-3-1 to Pae-3-1 | $\gamma$ -proteobacteria Pseudomonadales Pseudomonadaceae <i>Pseudomonas aeruginosa</i> PA7                         |
| Pae-4-1 to Pae-4-1 | $\gamma$ -proteobacteria Pseudomonadales Pseudomonadaceae <i>Pseudomonas aeruginosa</i> PACS2                       |
| Pae-5-1 to Pae-5-1 | $\gamma$ -proteobacteria Pseudomonadales Pseudomonadaceae <i>Pseudomonas aeruginosa</i> PAO1                        |
| Pae-6-1 to Pae-6-1 | $\gamma$ -proteobacteria Pseudomonadales Pseudomonadaceae <i>Pseudomonas aeruginosa</i> UCBPP-PA14                  |
| Pen-1-1 to Pen-1-2 | $\gamma$ -proteobacteria Pseudomonadales Pseudomonadaceae <i>Pseudomonas entomophila</i> L48                        |
| Pfl-1-1 to Pfl-1-2 | $\gamma$ -proteobacteria Pseudomonadales Pseudomonadaceae <i>Pseudomonas fluorescens</i> Pf-5                       |
| Pfl-2-1 to Pfl-2-2 | $\gamma$ -proteobacteria Pseudomonadales Pseudomonadaceae <i>Pseudomonas fluorescens</i> PfO-1                      |
| Ppu-1-1 to Ppu-1-2 | $\gamma$ -proteobacteria Pseudomonadales Pseudomonadaceae <i>Pseudomonas putida</i> F1                              |
| Ppu-2-1 to Ppu-2-2 | $\gamma$ -proteobacteria Pseudomonadales Pseudomonadaceae <i>Pseudomonas putida</i> KT2440                          |
| Psy-1-1 to Psy-1-3 | $\gamma$ -proteobacteria Pseudomonadales Pseudomonadaceae <i>Pseudomonas syringae</i> pv. <i>phaseolicola</i> 1448A |
| Psy-2-1 to Psy-2-3 | $\gamma$ -proteobacteria Pseudomonadales Pseudomonadaceae <i>Pseudomonas syringae</i> pv. <i>syringae</i> B728a     |
| Psy-3-1 to Psy-3-3 | $\gamma$ -proteobacteria Pseudomonadales Pseudomonadaceae <i>Pseudomonas syringae</i> pv. <i>tomato</i> str. DC3000 |

| abbrev               | RefSeq accession  | 5' at | 3' at           | genes                                                                                             |
|----------------------|-------------------|-------|-----------------|---------------------------------------------------------------------------------------------------|
| Psy-2-1              | NC_007005.1       | -     | 940989 940819   | PutP (COG0591)BaeS (COG0642)→ AtoC (COG2204)→ RNA→ PcnB (COG0617)→ FolK (COG0801)→                |
| Psy-1-1              | NC_005773.3       | -     | 1024846 1024676 | PutP (COG0591)BaeS (COG0642)→ AtoC (COG2204)→ RNA→ PcnB (COG0617)→ FolK (COG0801)→                |
| Psy-3-1              | NC_004578.1       | -     | 1046817 1046647 | PutP (COG0591)BaeS (COG0642)PAS (pfam00989)→ AtoC (COG2204)→ RNA→ PcnB (COG0617)→ FolK (COG0801)→ |
| Pff-2-1              | NC_007492.1       | +     | 5425361 5425532 | PutP (COG0591)BaeS (COG0642)→ AtoC (COG2204)→ RNA→ PcnB (COG0617)→ FolK (COG0801)→                |
| Pff-1-1              | NC_004129.6       | +     | 6041094 6041265 | PutP (COG0591)BaeS (COG0642)PAS (pfam00989)→ AtoC (COG2204)→ RNA→ PcnB (COG0617)→ FolK (COG0801)→ |
| Ppu-2-1              | NC_002947.3       | +     | 5338409 5338585 | PutP (COG0591)COG4191 (COG4191)→ AtoC (COG2204)→ RNA→ PcnB (COG0617)→ FolK (COG0801)→             |
| Ppu-1-1              | NZ_AALM01000108.1 | -     | 6023 5847       | RNA→ PcnB (COG0617)→ FolK (COG0801)→                                                              |
| Pen-1-1              | NC_008027.1       | +     | 5029985 5030162 | PutP (COG0591)COG4191 (COG4191)→ AtoC (COG2204)→ RNA→ PcnB (COG0617)→ FolK (COG0801)→             |
| Avi-1-1              | NZ_AAAU03000017.1 | +     | 11677 11852     | PutP (COG0591)NtrY (COG5000)→ AtoC (COG2204)→ RNA→ PcnB (COG0617)→ FolK (COG0801)→                |
| Pae-5-1              | NC_002516.2       | +     | 5308721 5308901 | PutP (COG0591)COG4191 (COG4191)→ AtoC (COG2204)→ RNA→ PcnB (COG0617)→ FolK (COG0801)→             |
| Pae-2-1              | NZ_AAKV01000104.1 | -     | 66034 65854     | HATPase_c (smart00387)→ AtoC (COG2204)→ RNA→ PcnB (COG0617)→ FolK (COG0801)→                      |
| Pae-4-1              | NZ_AAQW01000001.1 | +     | 5519005 5519185 | PutP (COG0591)COG4191 (COG4191)→ AtoC (COG2204)→ RNA→ PcnB (COG0617)→ FolK (COG0801)→             |
| Pae-6-1              | NZ_AABQ07000004.1 | +     | 39642 39822     | PutP (COG0591)COG4191 (COG4191)→ AtoC (COG2204)→ RNA→ PcnB (COG0617)→ FolK (COG0801)→             |
| Pae-1-1              | NZ_AAKW01000066.1 | -     | 195081 194901   | AtoC (COG2204)→ hypo→ RNA→ PcnB (COG0617)→ FolK (COG0801)→                                        |
| Pae-3-1              | NZ_AAQE01000003.1 | +     | 24552 24732     | PutP (COG0591)COG4191 (COG4191)→ AtoC (COG2204)→ RNA→ PcnB (COG0617)→ FolK (COG0801)→             |
| Psy-1-2              | NC_005773.3       | -     | 1738748 1738566 | ←DUF485 (pfam04341)←ProX (COG2113)RNA→ hypo→ VacJ (pfam04333)→                                    |
| Psy-2-2              | NC_007005.1       | +     | 4476246 4476428 | ←DUF485 (pfam04341)←ProX (COG2113)RNA→ hypo→ VacJ (pfam04333)→                                    |
| Psy-3-2              | NC_004578.1       | -     | 1778604 1778422 | ←DUF485 (pfam04341)←ProX (COG2113)RNA→ hypo→ VacJ (pfam04333)→                                    |
| Pff-2-2              | NC_007492.1       | +     | 4136134 4136304 | HTH_CueR (cd01108)→ LeuA (COG0119)→ RNA→ ←CaiC (COG0318) IVD (cd01156)→                           |
| Pff-1-2              | NC_004129.6       | +     | 4546343 4546513 | HTH_MERR (smart00422)→ LeuA (COG0119)→ RNA→ ←CaiC (COG0318) IVD (cd01156)→                        |
| Psy-2-3              | NC_007005.1       | -     | 2864869 2864701 | HTH_CueR (cd01108)→ LeuA (COG0119)→ RNA→ IVD (cd01156)→ COG4799 (COG4799)→                        |
| <sup>2</sup> Psy-1-3 | NC_005773.3       | -     | 3034238 3034071 | HTH_CueR (cd01108)→ LeuA (COG0119)→ RNA→ COG4799 (COG4799)→ CaiD (COG1024)→                       |
| Psy-3-3              | NC_004578.1       | -     | 3045151 3044971 | ←DnaC (COG1484)←COG4584 (COG4584)RNA→ IVD (cd01156)→ COG4799 (COG4799)→                           |
| Ppu-2-2              | NC_002947.3       | +     | 4013374 4013536 | HTH_CueR (cd01108)→ LeuA (COG0119)→ RNA→ ←SapB (COG1285) hypo→                                    |
| Ppu-1-2              | NZ_AALM01000002.1 | -     | 287203 287041   | HTH_CueR (cd01108)→ LeuA (COG0119)→ RNA→ ←SapB (COG1285) hypo (cons)→                             |
| <sup>1</sup> Avi-1-2 | NZ_AAAU03000009.1 | +     | 123848 124019   | hypo (cons)→ ←hypo RNA→ ←hypo ←DUF480 (pfam04337)                                                 |
| Pen-1-2              | NC_008027.1       | +     | 3150359 3150522 | HTH_CueR (cd01108)→ LeuA (COG0119)→ RNA→ ←SapB (COG1285) NapH (COG0348)→                          |

**cd01108** Helix-turn-helix transcription regulator CueR.

**cd01156** Isovaleryl-CoA dehydrogenase (IVD) is an is an acyl-CoA dehydrogenase, which catalyzes the third step in leucine catabolism, the conversion of isovaleryl-CoA (3-methylbutyryl-CoA) into 3-methylcrotonyl-CoA.

**COG0119** Isopropylmalate/homocitrate/citramalate synthases [Amino acid transport and metabolism]

**COG0318** Acyl-CoA synthetases (AMP-forming)/AMP-acid ligases II [Lipid metabolism / Secondary metabolites biosynthesis, transport, and catabolism]

**COG0348** Polyferredoxin [Energy production and conversion]

**COG0591** Na<sup>+</sup>/proline symporter [Amino acid transport and metabolism / General function prediction only]

**COG0617** tRNA nucleotidyltransferase/poly(A) polymerase [Translation, ribosomal structure and biogenesis]

**COG0642** Signal transduction histidine kinase [Signal transduction mechanisms]

**COG0801** 7,8-dihydro-6-hydroxymethylpterin-pyrophosphokinase [Coenzyme metabolism]

**COG1024** Enoyl-CoA hydratase/carnithine racemase [Lipid metabolism]

**COG1285** Uncharacterized membrane protein [Function unknown]

**COG1484** DNA replication protein [DNA replication, recombination, and repair]

**COG2113** ABC-type proline/glycine betaine transport systems, periplasmic components [Amino acid transport and metabolism]

**COG2204** Response regulator containing CheY-like receiver, AAA-type ATPase, and DNA-binding domains [Signal transduction mechanisms]

**COG4191** Signal transduction histidine kinase regulating C4-dicarboxylate transport system [Signal transduction mechanisms]

**COG4584** Transposase and inactivated derivatives [DNA replication, recombination,

and repair]

**COG4799** Acetyl-CoA carboxylase, carboxyltransferase component (subunits alpha and beta) [Lipid metabolism]

**COG5000** Signal transduction histidine kinase involved in nitrogen fixation and metabolism regulation [Signal transduction mechanisms]

**pfam00989** PAS domain.

**pfam04333** VacJ like lipoprotein.

**pfam04337** Protein of unknown function, DUF480.

**pfam04341** Protein of unknown function, DUF485.

**smart00387** Histidine kinase-like ATPases; Histidine kinase-, DNA gyrase B-, phytochrome-like ATPases.

**smart00422** helix\_turn\_helix, mercury resistance;

Duplicate sequences: the following putative homologs are not shown in the alignment because their sequences are identical to a homolog already shown: Pae-2-1, Pae-4-1

alignment positions 1...156

Psy-2-1 CAACCGAGC.CGAGAACAACAAAA**CUACC**.CUUA..GGUAGCGCCUGAACU.GG.UUG.GAUC.GAAU..GAUCAU.....UGCA...ACGCAGCGAC.CAAAGCAAUCCGUUUGCUCUUGA.CUCCCG.ACUGGGAGGUU

Psy-1-1 CAACCGAGC.CGAGAACAACAAAA**CUACC**.CUUA..GGUAGAGCCUGAACU.GG.UUG.GAUC.GAAU..GAUCAU.....UGCA...ACGCAGCGAC.CAAAGCAAUCCGUUUGCUCUUGA.CUCCCG.AUUGGGAGGUU

Psy-3-1 CAACCGAGC.CGAGAACAUAUAAAA**CUACC**.CUUA..GGUAGCGCCUGAACU.GG.UUG.GAUC.GAAU..GAUCAU.....UGCA...ACGCAGCGAC.CAAAGCAAUCCGUUUGCUCUUGA.CUCCCG.ACUGGGAGGUU

Pfl-2-1 CGACCGAGC.CGAGAACAACAAAA**CUGUC**.UUA..GACAGAGCCUGAACU.GG.UUG.GAUC.GCAA..GAUCAC.....UGCA...ACACAGCGAC.CAAAGCAAUCCGUUUGCUCUUGG.CUCCCG.AUUGGGAG.GG

Pfl-1-1 CAACCGAGC.CGAGAACAACAAAA**CUGCC**.CUAA..GGCAGAGCCUGAACU.GG.UUG.GAUC.GAAA..GGUCAU.....UGCAAC.U..CAGCGAU.CAAAGCAAUCCGUUUGCUCUUGG.CUCCCG.AUUGGGAG.GG

Ppu-2-1 CAACCGAGC.AGAGAACAACAAAA**CUGC**.ACUAAAA..GCAGCGCCUGAACU.GG.UUG.GAUC.GACA..GAUCAACGU.....GACA..U..CAGCGGC.CAAAGCAAUCCGUUUGCUCUUGA.CCCTCGGUUUGGGGUGC

Ppu-1-1 CAACCGAGC.AGAGAACAACAAAA**CUGC**.ACUAAAA..GCAGCGCCUGAACU.GG.UUG.GAUC.GACA..GAUCAACGU.....GUCA..U..CAGCGGC.CAAAGCAAUCCGUUUGCUCUUGA.CCCTCGGUUUGGGGUGC

Pen-1-1 CGAUCGAGC.AGAGAACAACAAAA**CUGC**.ACUAAAA..GCAGCACCUGAACU.GA.UUG.GAUC.GAAA..GAUCAGCA.....UCAUC..U..CGGCGAC.CAAAGCAAUCCGUUUGCUCUUGA.CCTCAGGUUUGGGGUGC

Avi-1-1 CAGCCGAGC.CGAGAACAACAAAA**CUGC**.CACGAA..GCAGCACCCGAAACU.GG.UAG.GUCC.GCA..GGACCUA.....GGCAUAU..CUGCAAC.CAAAGAAAUCCGUUUGCUAUUGG.CUCCCG.AUUGGGGGCCA

Pae-5-1 CAGCCGAGUCGGAAGAAGAAUAAAA**CUGCC**.UUGA..GGCAGCGCACAGACU.GG.UUG.GAUC.GCUCGACGAUCAUGGC.....AGCA..U..CAGCGAC.CAAAGCAAUCCGUUUGCUAUUGAA.CUCCCGAGCCUGGGAGUA

Pae-6-1 CAGCCGAGUCGGAAGAAGAAUAAAA**CUGCC**.UCGA..GGCAGCGCACAGACU.GG.UUG.GAUC.GCUCGACGAUCAUGGC.....AGCA..U..CAGCGAC.CAAAGCAAUCCGUUUGCUAUUGAA.CUCCCGAGCCUGGGAGUA

Pae-1-1 CAGCCGAGUCGGAAGAAGAAUAAAA**CUGCC**.UUGA..GGCAGCGCACAGACU.GG.UUGGUAUCG.CUCGA..CGAUAUGGC.....AGCA..U..CAGCGAC.CAAAGCAAUCCGUUUGCUAUUGAA.CUCCCGAGCCUGGGAGUA

Pae-3-1 UAGCCGAGUCGGAAGAAGAAUAAAA**CUGCC**.UCGA..GGCAGCGCACAGACU.GG.UUGGUAUCG.CUUGG..CGAUAUGGC.....AGCA..U..CAGCGAC.CAAAGCAAUCCGUUUGCUAUUGAA.CUCCCGAGCCUGGGAGUA

Psy-1-2 CGACCGGAC.AGAGAACAUAUAAAA**CUACC**.UUGA..GGUAGCUUCCGAAACU.GG.UUG.GAUC.ACGA..UGUUGGUCAGACAGGUGAUUAAGCGAG.U..CAGCG.CUCAAAAAAAUACGUUUGCUCUUG..ACCTCGGAUGGGGU..

Psy-2-2 CGACCGGAC.CGAGAACAUAUAAAA**CUACC**.GUCA..GGUAGCUUCCGAAACU.GG.UUG.GAUC.ACGC..UGUUGGUCAGGAGGUGAUUAAGCGAA.U..CAGCG.CUCAAAAAAAUACGUUUGCUCUUG..ACCTCGGAUGGGGU..

Psy-3-2 CGACCGGAC.AGAGAACAUAUAAAA**CUACC**.GUCA..GGUAGCUUCCGAAACU.GG.UUG.GAUC.AGGC..UGUUGGUCAGACAGAUUAUAGCGAA.U..CAGCG.CUCAAAAAAAUACGUUUGCUCUUGA.CCTCG.AUU..GGGG..

Pfl-2-2 CAACCGGAC.AGAGAACAUAUAAAA**CUACC**.UUGA..GGUAGCUUCCGAAACU.GG.UUG.GAUC.GCUA..GACGAGAA.....AGCAGA.U..CAGCG.CUCAAAAAAAUACGUUUGCUCUUG..ACCTCGGAUGGGGU..C

Pfl-1-2 CAACCGGUC.AGAGAACAUAUAAAA**CUACC**.CUGA..GGUAGCUUCCGAAACU.GG.UUG.GAUC.GCCC..UGGGACACAU.....UGAA..U..CAGCG.CUCAAAAAAAUACGUUUGCUCUUG..AUCCCGGAUGGGGU..C

Psy-2-3 CAGCCGAGC.AGAGAACAACAAAA**CUGCC**.CCGA..GGCAGUUGCCGAAACU.GG.UUG.GAUC.ACUA..CGAUGAAAGU.....GUCA..U..CAGCG.CUCAAAAAAAUACGUUUGCUCUUG..AUCCCGGUCUGGGU..C

<sup>2</sup>Psy-1-3 CAGCCGAGC.AGAGAUAUAAAA**CUGCC**.CUGA..GGCAGCUUCCGAAACU.GG.UUG.GAUC.ACAU..GAUGAA.....AGCUUGAU..CAGCG.CUCAAAAAAAUACGUUUGCUCUUG..GUCCCGCAUGGGGAC..C

Psy-3-3 CAGCCGAGC.AGAGAACAUAUAAAA**CUGCC**.CUGA..GGCAGCUUCCGAAACU.GG.UUGGUAUCG.UUG...CGAUGAAAGCACGUAAGUGACA..U..CAGCG.CUCAAAAAAAUACGUUUGCUCUUG..GUCCAGCCUCUGGAC..C

Ppu-2-2 CGGUUCGUC.ACAGAACAUAUAAAA**CUACC**.UCA..GGUAGGGGCAGC.CA.GGUUUGC.GAUCAGCAA..UGAUGAA.....AGCAGG.U..CAGCG.CUCAAAAAAAUACGUUUGCUCUUG..ACCTCGCAUGGGGU..C

Ppu-1-2 CGGUUCGUC.ACAGAACAUAUAAAA**CUACC**.UCA..GGUAGGGGCAGC.CA.GGUUUGC.GAUCAGCAA..UGAUGAA.....AGCAGG.U..CAGCG.CUCAAAAAAAUACGUUUGCUCUUG..ACCTCGCAUGGGGU..C

<sup>1</sup>Avi-1-2 CAGCCGAGC.AGAGAACAUAUAAAA**CUACC**.UCGA..GGUAGCGCCGGAACU.GG.UUG.GAUC.ACUUGGGAUCAU.....CGCGAUU..CGGCGAU..CAAAGAAAUACGUUUGCUCUUG..GCCTCGGCU.GGGGC..

Pen-1-2 CAACCGAGC.ACAGAACAUAUAAAA**CUACC**.UGCAA..GGUAGCGGCAGU.CACGG.UUG.GAUC.ACGUUG.GAUGAACGC.....AGG...U..CAGCG.CUCAAAAAAAUACGUUUGCUCUUG..GCCTCGGGAUGGGGCC.

<<<<<<.....<<<<<<.....>>>>>>.....>>.>>.>>>.<<<<<<.....>>>>>>.....<<<<<<.....>>>>>>.....

1?12021.....00220.....02200.....12.02.1?1.????.?2???.2201?.....?1022.....

CRR●CRGR●●AGAA●AAYAAAA●CURCC●YY●A●●●GYAG●●●●●GRAC●GG●UUG●GAUC●G●●●●●RY●●●●●●●GCR●●U●●●CAGCG●C●CAAAR●AAU●CGUUGCU●UU●●●YCC●G●●U●GGRR●●●

alignment positions 157...225

```

Psy-2-1 UCA.C.A...GACGCA.G....GUCUC....GUGAA.UGGGCACU.CAA.CAAA.AACAAGAAGCCCA
Psy-1-1 UCA.C.A...GACGAA.G....GUCUC....GUGAA.UGGGCACU.CAA.CAAA.AACAAGAAGCCCA
Psy-3-1 UCA.C.A...GACAAA.A....GUCUC....GUGAA.UGGGCACU.CAA.CAAA.AACAAGAAGCCCG
Pfl-2-1 UCA.U.G...AAGGAAAAG....CUUC....AUGCAGAGGGCACU.CAA.CAAA.AACAAGAAGCCCG
Pfl-1-1 UCA.U.C...CUGGGUAAAC...CAG....AUGACAAGGGCGUU.UAA.CAAA.AACAAGAAGCCCG
Ppu-2-1 UCC.A....CAAGCUUCGAGAUUUG....UGGAC.AGGGCACU.CAA.CAAA.AACAAGAAGCCCA
Ppu-1-1 UCC.A....CAAGCUUCGAGAUUUG....UGGAC.AGGGCACU.CAA.CAAA.AACAAGAAGCCCA
Pen-1-1 UUC.A....CAA.GCUUC....GAGAUUU.GUGGAC.AGGGCACU.CAA.CAAA.AACAAGAAGCCCA
Avi-1-1 UCC.C....GGAGCCAAGG..AGCCAACC..GGGAC..GGGCGCA.CAA.CAAG.AACAACAAGCCCG
Pae-5-1 UCC.C....UGAAGCGACUGGCUCAA....GGGAC..GGGU.CGACAAACAAA.AACAACAAGCCCG
Pae-6-1 UCC.C....UGAAGCGACUGGCUCAA....GGGAC..GGGU.CGACAAACAAA.AACAACAAGCCCG
Pae-1-1 UCC.C....UGAAGCGACUGGCUCAA....GGGAC..GGGUCGA.CAAACAAAACAACAA.GCCCG
Pae-3-1 UCC.C....UGAAGCGACUGGCUCAA....GGGAC..GGGUCAA.CAAACAAAACAACAA.GCCCG
Psy-1-2 .CG.C.U.CAACCAAGCG....UGUAAA..GGGAC.UGGCGAU..CAA.CAAC.AAUAACA.GGCCG
Psy-2-2 .CG.C....ACAACAACGC...UGUAAA..GGGAC.UGGUCGC..CAA.CAAC.AAUAACA.GGCCG
Psy-3-2 UCG.C....ACAAGAACGC...UGUGAA..GGGAC.UGGUCGC..CAA.CAAC.AAGAACA.GGCCG
Pfl-2-2 GCC..AAAAAC.AGCG....GUAAA..GGGACAGGGUUGC..CAA..AAACAACAACA.GACCG
Pfl-1-2 GCC..AAAA.AC.AGCA....GUAAA..GGGACAGGGUUGC..CAA..AAACAACAUA.GACCG
Psy-2-3 GCU.C....AAAAAGA....UGUGAA..GGGUC.AGGUUGC..CAA..AAACAACAACA.GGCCU
Psy-1-3 GCU.C....A..AAAAAGC...AGUAAA..GGGAC.AGGUUGC..AAA..AAACAACAACA.GGCCA
Psy-3-3 GCU.C....AAAAAGA....UGUGAA..GGGUC.AGGUUGC..CAA..AAACAACAACA.GGCCU
Ppu-2-2 GCC.C....G..CAACAC....CA....GGAC..AAGCGA..CAA..AAACAACAUA.GGCCG
Ppu-1-2 GCC.C....G..CAACAC....CA....GGAC..AAGCGA..CAA..AAACAACAACA.GGCCG
Avi-1-2 .CGAC....UGAAGCACUUUCUUCAGA....GUGGC..GGUUGA..CAA..AAACAACAACA.GAUGC
Pen-1-2 UGC.....GGUACCGAG.....GCAA.CGGCUGA..CAA.AAAC.AACAACA.GGCC
<<<.C.....>>>.....>>>.....<<<<.....>>>>.
???.C.....???.???.?121.121?.
o.C-o-----o.oRRo.o.o.o---o.o.o.o---RGG.C-oGG.YR-o-CAA-oAAA-AACAA-A-G.CCR

```

## 2.21 coccus-1

This possible ncRNA is present in many Firmicutes in the genera *Staphylococcus*, *Streptococcus* and *Lactococcus*. The motif consists of two hairpins. Although there is covariation, there are also mutations that

break the structure, and many putative homologs have strong homology to one hairpin, but not the other.

### abbrev. of hits

Sau-1-1 to Sau-1-2  
 Sau-2-1 to Sau-2-6  
 Sau-3-1 to Sau-3-8  
 Sau-4-1 to Sau-4-8  
 Sau-5-1 to Sau-5-10  
 Sau-6-1 to Sau-6-8  
 Sau-8-1 to Sau-8-8  
 Sau-7-1 to Sau-7-8  
 Sau-9-1 to Sau-9-8  
 Sau-10-1 to Sau-10-6  
 Sau-11-1 to Sau-11-6  
 Sep-1-1 to Sep-1-1

### taxonomy of species

Firmicutes Bacillales *Staphylococcus aureus* RF122  
 Firmicutes Bacillales *Staphylococcus aureus subsp. aureus* COL  
 Firmicutes Bacillales *Staphylococcus aureus subsp. aureus* JH1  
 Firmicutes Bacillales *Staphylococcus aureus subsp. aureus* JH9  
 Firmicutes Bacillales *Staphylococcus aureus subsp. aureus* MRSA252  
 Firmicutes Bacillales *Staphylococcus aureus subsp. aureus* MSSA476  
 Firmicutes Bacillales *Staphylococcus aureus subsp. aureus* Mu50  
 Firmicutes Bacillales *Staphylococcus aureus subsp. aureus* MW2  
 Firmicutes Bacillales *Staphylococcus aureus subsp. aureus* N315  
 Firmicutes Bacillales *Staphylococcus aureus subsp. aureus* NCTC 8325  
 Firmicutes Bacillales *Staphylococcus aureus subsp. aureus* USA300  
 Firmicutes Bacillales *Staphylococcus epidermidis* ATCC 12228



|                      |            |                 |                                                                 |                                             |
|----------------------|------------|-----------------|-----------------------------------------------------------------|---------------------------------------------|
| Sep-2-1 to Sep-2-2   | Firmicutes | Bacillales      | <i>Staphylococcus epidermidis</i>                               | RP62A                                       |
| Sha-1-1 to Sha-1-39  | Firmicutes | Bacillales      | <i>Staphylococcus haemolyticus</i>                              | JCSC1435                                    |
| Ssa-1-1 to Ssa-1-7   | Firmicutes | Bacillales      | <i>Staphylococcus saprophyticus</i> subsp. <i>saprophyticus</i> | ATCC 15305                                  |
| Lre-1-1 to Lre-1-17  | Firmicutes | Lactobacillales | Lactobacillaceae                                                | <i>Lactobacillus reuteri</i> 100-23         |
| Lre-2-1 to Lre-2-22  | Firmicutes | Lactobacillales | Lactobacillaceae                                                | <i>Lactobacillus reuteri</i> JCM 1112       |
| Sag-1-1 to Sag-1-2   | Firmicutes | Lactobacillales | Streptococcaceae                                                | <i>Streptococcus agalactiae</i> 18RS21      |
| Sag-2-1 to Sag-2-2   | Firmicutes | Lactobacillales | Streptococcaceae                                                | <i>Streptococcus agalactiae</i> 2603V/R     |
| Sag-3-1 to Sag-3-2   | Firmicutes | Lactobacillales | Streptococcaceae                                                | <i>Streptococcus agalactiae</i> 515         |
| Sag-4-1 to Sag-4-1   | Firmicutes | Lactobacillales | Streptococcaceae                                                | <i>Streptococcus agalactiae</i> A909        |
| Sag-5-1 to Sag-5-2   | Firmicutes | Lactobacillales | Streptococcaceae                                                | <i>Streptococcus agalactiae</i> CJB111      |
| Sag-6-1 to Sag-6-1   | Firmicutes | Lactobacillales | Streptococcaceae                                                | <i>Streptococcus agalactiae</i> COH1        |
| Sag-7-1 to Sag-7-1   | Firmicutes | Lactobacillales | Streptococcaceae                                                | <i>Streptococcus agalactiae</i> H36B        |
| Sag-8-1 to Sag-8-1   | Firmicutes | Lactobacillales | Streptococcaceae                                                | <i>Streptococcus agalactiae</i> NEM316      |
| Smu-1-1 to Smu-1-2   | Firmicutes | Lactobacillales | Streptococcaceae                                                | <i>Streptococcus mutans</i> UA159           |
| Spn-1-1 to Spn-1-1   | Firmicutes | Lactobacillales | Streptococcaceae                                                | <i>Streptococcus pneumoniae</i> R6          |
| Spn-2-1 to Spn-2-2   | Firmicutes | Lactobacillales | Streptococcaceae                                                | <i>Streptococcus pneumoniae</i> TIGR4       |
| Spy-1-1 to Spy-1-4   | Firmicutes | Lactobacillales | Streptococcaceae                                                | <i>Streptococcus pyogenes</i> M1 GAS        |
| Spy-2-1 to Spy-2-3   | Firmicutes | Lactobacillales | Streptococcaceae                                                | <i>Streptococcus pyogenes</i> M49 591       |
| Spy-3-1 to Spy-3-3   | Firmicutes | Lactobacillales | Streptococcaceae                                                | <i>Streptococcus pyogenes</i> MGAS10270     |
| Spy-4-1 to Spy-4-3   | Firmicutes | Lactobacillales | Streptococcaceae                                                | <i>Streptococcus pyogenes</i> MGAS10394     |
| Spy-5-1 to Spy-5-3   | Firmicutes | Lactobacillales | Streptococcaceae                                                | <i>Streptococcus pyogenes</i> MGAS10750     |
| Spy-6-1 to Spy-6-3   | Firmicutes | Lactobacillales | Streptococcaceae                                                | <i>Streptococcus pyogenes</i> MGAS2096      |
| Spy-7-1 to Spy-7-3   | Firmicutes | Lactobacillales | Streptococcaceae                                                | <i>Streptococcus pyogenes</i> MGAS315       |
| Spy-8-1 to Spy-8-4   | Firmicutes | Lactobacillales | Streptococcaceae                                                | <i>Streptococcus pyogenes</i> MGAS5005      |
| Spy-9-1 to Spy-9-3   | Firmicutes | Lactobacillales | Streptococcaceae                                                | <i>Streptococcus pyogenes</i> MGAS6180      |
| Spy-10-1 to Spy-10-3 | Firmicutes | Lactobacillales | Streptococcaceae                                                | <i>Streptococcus pyogenes</i> MGAS8232      |
| Spy-11-1 to Spy-11-3 | Firmicutes | Lactobacillales | Streptococcaceae                                                | <i>Streptococcus pyogenes</i> MGAS9429      |
| Spy-12-1 to Spy-12-3 | Firmicutes | Lactobacillales | Streptococcaceae                                                | <i>Streptococcus pyogenes</i> SSI-1         |
| Ssu-1-1 to Ssu-1-22  | Firmicutes | Lactobacillales | Streptococcaceae                                                | <i>Streptococcus suis</i> 89/1591           |
| Sth-1-1 to Sth-1-1   | Firmicutes | Lactobacillales | Streptococcaceae                                                | <i>Streptococcus thermophilus</i> CNRZ1066  |
| Sth-2-1 to Sth-2-1   | Firmicutes | Lactobacillales | Streptococcaceae                                                | <i>Streptococcus thermophilus</i> LMD-9     |
| Sth-3-1 to Sth-3-1   | Firmicutes | Lactobacillales | Streptococcaceae                                                | <i>Streptococcus thermophilus</i> LMG 18311 |

| abbrev   | RefSeq accession  |   | 5' at | 3' at | genes                                      |
|----------|-------------------|---|-------|-------|--------------------------------------------|
| Ssu-1-1  | NZ_AAFA02000017.1 | + | 3520  | 3641  | COG3464 (COG3464) → RNA → ← PrfC (COG4108) |
| Spy-8-1  | NC_007297.1       | + | 48492 | 48578 | PurD (COG0151) → RNA → PurE (COG0041) →    |
| Spy-1-1  | NC_002737.1       | + | 47904 | 47990 | RNA → FldA (COG0716) →                     |
| Spy-4-1  | NC_006086.1       | + | 89441 | 89527 | PurD (COG0151) → RNA → PurE (COG0041) →    |
| Spy-9-1  | NC_007296.1       | + | 48201 | 48287 | RNA → FldA (COG0716) →                     |
| Spy-12-1 | NC_004606.1       | + | 42630 | 42716 | RNA →                                      |
| Spy-7-1  | NC_004070.1       | + | 48631 | 48717 | RNA → FldA (COG0716) →                     |
| Spy-2-1  | NZ_AAFV01000004.1 | - | 10086 | 10000 | RNA →                                      |
| Spy-11-1 | NC_008021.1       | + | 48228 | 48314 | RNA →                                      |
| Spy-3-1  | NC_008022.1       | + | 48597 | 48683 | RNA → FldA (COG0716) →                     |
| Spy-6-1  | NC_008023.1       | + | 48203 | 48289 | RNA →                                      |
| Spy-5-1  | NC_008024.1       | + | 48488 | 48574 | PurD (COG0151) → RNA → PurE (COG0041) →    |
| Spy-10-1 | NC_003485.1       | + | 48513 | 48599 | PurD (COG0151) → RNA → PurE (COG0041) →    |
| Sag-8-1  | NC_004368.1       | + | 59292 | 59378 | PurD (COG0151) → RNA → PurE (COG0041) →    |

|          |                   |   |         |         |                                                                  |
|----------|-------------------|---|---------|---------|------------------------------------------------------------------|
| Sag-3-1  | NZ_AAJP01000029.1 | - | 7801    | 7715    | RNA→                                                             |
| Sag-6-1  | NZ_AAJR01000025.1 | - | 3651    | 3565    | PurD (COG0151) → RNA → PurE (COG0041) →                          |
| Sag-4-1  | NC_007432.1       | + | 59209   | 59295   | PurD (COG0151) → RNA → PurE (COG0041) →                          |
| Sag-7-1  | NZ_AAJS01000005.1 | + | 42970   | 43056   | RNA→                                                             |
| Sag-2-1  | NC_004116.1       | + | 59396   | 59482   | PurD (COG0151) → RNA → PurE (COG0041) →                          |
| Sag-1-1  | NZ_AAJO01000037.1 | + | 12850   | 12936   | RNA→                                                             |
| Sag-5-1  | NZ_AAJQ01000011.1 | + | 33507   | 33593   | RNA→                                                             |
| Spy-8-2  | NC_007297.1       | + | 756948  | 757054  | ←hypo RNA→ ←hypo                                                 |
| Spy-1-2  | NC_002737.1       | + | 838364  | 838470  | AceF (COG0508) → RNA → Biotin_lipoyl (pfam00364) Lpd (COG1249) → |
| Spy-9-2  | NC_007296.1       | + | 754881  | 754987  | putative extracellular matrix binding protein → RNA →            |
| Spy-11-2 | NC_008021.1       | + | 836161  | 836267  | RNA→                                                             |
| Spy-3-2  | NC_008022.1       | + | 828063  | 828169  | ←hypo RNA→ ←hypo                                                 |
| Spy-6-2  | NC_008023.1       | + | 796738  | 796844  | RNA→                                                             |
| Spy-12-2 | NC_004606.1       | - | 1169720 | 1169614 | RNA→                                                             |
| Spy-7-2  | NC_004070.1       | + | 727036  | 727142  | COG2374 (COG2374) → RNA →                                        |
| Spy-2-2  | NZ_AAFV01000056.1 | - | 5123    | 5017    | RNA→                                                             |
| Spy-5-2  | NC_008024.1       | + | 859336  | 859442  | ←hypo RNA→ ←hypo                                                 |
| Spy-10-2 | NC_003485.1       | + | 836933  | 837039  | AceF (COG0508) → RNA → Lpd (COG1249) Biotin_lipoyl (pfam00364) → |
| Spy-4-2  | NC_006086.1       | + | 783144  | 783250  | ←hypo RNA→ ←hypo                                                 |
| Spy-8-3  | NC_007297.1       | + | 756950  | 757054  | ←hypo RNA→ ←hypo                                                 |
| Spy-1-3  | NC_002737.1       | + | 838366  | 838470  | AceF (COG0508) → RNA → Biotin_lipoyl (pfam00364) Lpd (COG1249) → |
| Ssu-1-2  | NZ_AAFA02000083.1 | - | 5326    | 5222    | Ribosomal_S8 (pfam00410) → RNA → RplF (COG0097) →                |
| Ssu-1-3  | NZ_AAFA02000016.1 | - | 13879   | 13775   | MrcB (COG0744) → RNA → RpoB (COG0085) →                          |
| Smu-1-1  | NC_004350.1       | + | 53721   | 53824   | CPSase_L_D2 (pfam02786) → RNA → PurE (COG0041) →                 |
| Ssu-1-4  | NZ_AAFA02000093.1 | - | 1031    | 928     | ←AcoB (COG0022) RNA→ ←TPP_E1_PDC_ADC_BCADC (cd02000)             |
| Ssu-1-5  | NZ_AAFA02000066.1 | - | 2732    | 2628    | ←COG4129 (COG4129) RNA→ ←Phosphoglycerate_kinase (cd00318)       |
| Spy-8-4  | NC_007297.1       | - | 548987  | 548871  | ←COG4120 (COG4120) RNA→ ←PutA (COG1012) EutG (COG1454)           |
| Spy-5-3  | NC_008024.1       | - | 608890  | 608774  | ←COG4120 (COG4120) RNA→ ←yrhL_like (cd01840) COG1835 (COG1835)   |
| Spy-1-4  | NC_002737.1       | - | 587963  | 587847  | COG3547 (COG3547) → RNA → ←enolase (cd03313)                     |
| Spy-12-3 | NC_004606.1       | + | 1367615 | 1367731 | RNA→                                                             |
| Spy-7-3  | NC_004070.1       | - | 529126  | 529010  | ←streptolysin S associated protein RNA→ ←enolase (cd03313)       |
| Spy-3-3  | NC_008022.1       | - | 590126  | 590010  | ←Streptolysin S precursor RNA→ ←enolase (cd03313)                |
| Spy-11-3 | NC_008021.1       | - | 588877  | 588761  | RNA→                                                             |
| Spy-6-3  | NC_008023.1       | - | 590278  | 590162  | RNA→                                                             |
| Spy-2-3  | NZ_AAFV01000009.1 | + | 16935   | 17051   | Transposase_20 (pfam02371) → RNA → ←Eno (COG0148)                |
| Spy-9-3  | NC_007296.1       | - | 546590  | 546474  | Transposase_20 (pfam02371) → RNA → ←enolase (cd03313)            |
| Spy-4-3  | NC_006086.1       | - | 575023  | 574907  | ←Streptolysin S precursor RNA→ ←Eno (COG0148)                    |
| Spy-10-3 | NC_003485.1       | - | 637677  | 637561  | ←streptolysin S associated protein RNA→ ←enolase (cd03313)       |
| Sau-6-1  | NC_002953.3       | + | 1244039 | 1244142 | ←hypo RNA→ ←FtsK (COG1674)                                       |
| Sau-7-1  | NC_003923.1       | + | 1215366 | 1215469 | adh_short (pfam00106) → RNA → AcpP (COG0236) →                   |
| Sau-3-1  | NZ_AAPK01000033.1 | - | 8812    | 8709    | RNA→                                                             |
| Sau-4-1  | NZ_AAPL01000016.1 | - | 7809    | 7706    | adh_short (pfam00106) → RNA → AcpP (COG0236) →                   |
| Sau-11-1 | NC_007793.1       | + | 1231269 | 1231372 | RNA→                                                             |

|          |                   |   |         |         |                                                  |
|----------|-------------------|---|---------|---------|--------------------------------------------------|
| Sau-10-1 | NC_007795.1       | + | 1151323 | 1151426 | AICARFT_IMPCHas (pfam01808)MGS (pfam02142)→ RNA→ |
| Sau-2-1  | NC_002951.2       | + | 1255089 | 1255192 | AICARFT_IMPCHas (pfam01808)MGS (pfam02142)→ RNA→ |
| Sau-8-1  | NC_002758.2       | + | 1291833 | 1291936 | RNA→                                             |
| Sau-9-1  | NC_002745.2       | + | 1215504 | 1215607 | adh_short (pfam00106)→ RNA→ AcpP (COG0236)→      |
| Sau-5-1  | NC_002952.2       | + | 1257472 | 1257575 | adh_short (pfam00106)→ RNA→ AcpP (COG0236)→      |
| Sau-11-2 | NC_007793.1       | - | 2866749 | 2866627 | RNA→                                             |
| Sau-10-2 | NC_007795.1       | - | 2815313 | 2815191 | RNA→ ←AICARFT_IMPCHas (pfam01808)MGS (pfam02142) |
| Sau-2-2  | NC_002951.2       | - | 2803401 | 2803279 | RNA→ ←AICARFT_IMPCHas (pfam01808)MGS (pfam02142) |
| Sau-8-2  | NC_002758.2       | - | 2872466 | 2872344 | RNA→                                             |
| Sau-9-2  | NC_002745.2       | - | 2808753 | 2808631 | ←hypo RNA→ hypo→                                 |
| Sau-3-2  | NZ_AAPK01000001.1 | - | 284096  | 283974  | RNA→ DapF (COG0253)→                             |
| Sau-4-2  | NZ_AAPL01000001.1 | - | 265140  | 265018  | RNA→ hypo (cons)→                                |
| Sau-1-1  | NC_007622.1       | - | 2265660 | 2265538 | RNA→                                             |
| Sau-5-2  | NC_002952.2       | + | 438463  | 438585  | ←hypo RNA→ ←putative DNA-binding protein         |
| Sau-5-3  | NC_002952.2       | - | 2882270 | 2882148 | RNA→ COG3942 (COG3942)→                          |
| Sau-5-4  | NC_002952.2       | - | 1136979 | 1136857 | ←Rpe (COG0036) RNA→ hypo→                        |
| Sau-1-2  | NC_007622.1       | - | 2114388 | 2114266 | RNA→                                             |
| Sau-6-2  | NC_002953.3       | + | 770241  | 770363  | ←hypo RNA→ ←FtsK (COG1674)                       |
| Sau-6-3  | NC_002953.3       | + | 2519319 | 2519441 | ←hypo RNA→ ←AraJ (COG2814)                       |
| Sau-6-4  | NC_002953.3       | - | 2155953 | 2155831 | ←PnbA (COG2272) RNA→ ABC_SMC_barmotin (cd03278)→ |
| Sau-7-2  | NC_003923.1       | + | 771813  | 771935  | hypo→ RNA→ Rpe (COG0036)→                        |
| Sau-7-3  | NC_003923.1       | + | 2540151 | 2540273 | ←hypo RNA→                                       |
| Sau-7-4  | NC_003923.1       | - | 2176848 | 2176726 | RNA→ hypo→                                       |
| Sau-6-5  | NC_002953.3       | - | 1856583 | 1856461 | ←PnbA (COG2272) RNA→ ABC_SMC_barmotin (cd03278)→ |
| Sau-7-5  | NC_003923.1       | - | 1877248 | 1877126 | ←hypo RNA→ ←hypo                                 |
| Sau-8-3  | NC_002758.2       | + | 2597882 | 2598004 | RNA→                                             |
| Sau-9-3  | NC_002745.2       | + | 2526688 | 2526810 | tRNA_m1G_MT (pfam01746)→ RNA→ ←RarD (COG2962)    |
| Sau-3-3  | NZ_AAPK01000001.1 | + | 11544   | 11666   | hypo (cons)→ RNA→ ←AraJ (COG2814)                |
| Sau-4-3  | NZ_AAPL01000042.1 | + | 4066    | 4188    | RNA→                                             |
| Sau-8-4  | NC_002758.2       | + | 2723168 | 2723290 | RNA→                                             |
| Sau-9-4  | NC_002745.2       | + | 2652742 | 2652864 | tRNA_m1G_MT (pfam01746)→ RNA→ ←RarD (COG2962)    |
| Sau-3-4  | NZ_AAPK01000001.1 | + | 134799  | 134921  | ←DapF (COG0253) RNA→                             |
| Sau-4-4  | NZ_AAPL01000001.1 | + | 115843  | 115965  | DUF896 (pfam05979)→ RNA→ ←COG3607 (COG3607)      |
| Sau-8-5  | NC_002758.2       | - | 1142938 | 1142816 | RNA→                                             |
| Sau-9-5  | NC_002745.2       | - | 1066610 | 1066488 | COG0595 (COG0595)→ RNA→ ←TrkA (COG0569)          |
| Sau-3-5  | NZ_AAPK01000013.1 | + | 9412    | 9534    | RNA→                                             |
| Sau-4-5  | NZ_AAPL01000011.1 | - | 54843   | 54721   | RNA→                                             |
| Sau-5-5  | NC_002952.2       | + | 1743803 | 1743925 | ←hypo RNA→ ←MntH (COG1914)                       |
| Sau-5-6  | NC_002952.2       | - | 2254246 | 2254124 | ←hypo RNA→ →                                     |
| Sau-2-3  | NC_002951.2       | - | 1081817 | 1081695 | FoID (COG0190)→ RNA→ chitinase-related protein→  |
| Sau-11-3 | NC_007793.1       | - | 1058342 | 1058220 | RNA→                                             |
| Sau-10-3 | NC_007795.1       | - | 978217  | 978095  | FoID (COG0190)→ RNA→ hypo→                       |
| Sau-8-6  | NC_002758.2       | - | 1116827 | 1116705 | RNA→                                             |

|          |                   |   |         |         |                                                                            |
|----------|-------------------|---|---------|---------|----------------------------------------------------------------------------|
| Sau-9-6  | NC_002745.2       | - | 1040499 | 1040377 | ←hypo RNA→ ←CeuB (COG4606)                                                 |
| Sau-3-6  | NZ_AAPK01000013.1 | + | 35459   | 35581   | RNA→                                                                       |
| Sau-4-6  | NZ_AAPL01000011.1 | - | 28796   | 28674   | RNA→                                                                       |
| Sau-8-7  | NC_002758.2       | + | 2705594 | 2705716 | RNA→                                                                       |
| Sau-9-7  | NC_002745.2       | + | 2635168 | 2635290 | tRNA_mI <sub>G</sub> _MT (pfam01746) → RNA→ ←RarD (COG2962)                |
| Sau-3-7  | NZ_AAPK01000001.1 | + | 117226  | 117348  | ←DapF (COG0253) RNA→                                                       |
| Sau-4-7  | NZ_AAPL01000001.1 | + | 98270   | 98392   | HMA (cd00371)ZntA (COG2217) → RNA→ CopZ (COG2608) →                        |
| Sau-5-7  | NC_002952.2       | + | 2550397 | 2550519 | ←NarK (COG2223) RNA→ COG5504 (COG5504) →                                   |
| Sau-11-4 | NC_007793.1       | + | 1873177 | 1873299 | RNA→                                                                       |
| Sau-10-4 | NC_007795.1       | + | 1776851 | 1776973 | AICARFT_IMPCHas (pfam01808)MGS (pfam02142) → RNA→                          |
| Sau-2-4  | NC_002951.2       | + | 1850866 | 1850988 | AICARFT_IMPCHas (pfam01808)MGS (pfam02142) → RNA→                          |
| Sau-7-6  | NC_003923.1       | + | 1842030 | 1842152 | ←ArgE (COG0624) RNA→ ←hypo                                                 |
| Sau-5-8  | NC_002952.2       | + | 1547267 | 1547389 | ←Era (COG1159)MMR_HSR1 (pfam01926) RNA→ ←hypo                              |
| Sau-6-6  | NC_002953.3       | + | 1821365 | 1821488 | ←ArgE (COG0624) RNA→ ←hypo                                                 |
| Sha-1-1  | NC_007168.1       | - | 802593  | 802470  | AraJ (COG2814) → RNA→ ←MarR (COG1846)                                      |
| Sha-1-2  | NC_007168.1       | - | 1102516 | 1102393 | ←16S RIBOSOMAL RNA RNA→ ←Fur (COG0735)                                     |
| Sha-1-3  | NC_007168.1       | + | 2570385 | 2570508 | hypo → RNA → ←hypo                                                         |
| Sha-1-4  | NC_007168.1       | - | 839902  | 839779  | ←WecB (COG0381) RNA→ adh_short (pfam00106) →                               |
| Sha-1-5  | NC_007168.1       | - | 482661  | 482538  | ←hypo RNA→ ←AlsD (COG3527)                                                 |
| Sha-1-6  | NC_007168.1       | + | 1996068 | 1996191 | ←FabI (COG0623) RNA→ ←KefB (COG0475)TrkA (COG0569)                         |
| Sha-1-7  | NC_007168.1       | - | 941168  | 941045  | hypo → RNA → ←FabZ (cd01288)                                               |
| Ssa-1-1  | NC_007350.1       | - | 622311  | 622189  | hypo → RNA → ←PTS_IIB_glc (cd00212)PtsG (COG1263)                          |
| Ssa-1-2  | NC_007350.1       | - | 2080956 | 2080834 | ARA1 (COG0656) → RNA→ Glycos_transf_2 (pfam00535) →                        |
| Ssa-1-3  | NC_007350.1       | + | 2125473 | 2125595 | LysM (cd00118)COG3942 (COG3942)LysM (pfam01476) → RNA→ ←PitA (COG0306)     |
| Ssa-1-4  | NC_007350.1       | + | 496871  | 496991  | ←TauB (COG1116) RNA→ ←hypo                                                 |
| Ssa-1-5  | NC_007350.1       | + | 2503605 | 2503736 | ARA1 (COG0656) → RNA→ ←hypo                                                |
| Sha-1-8  | NC_007168.1       | + | 786707  | 786819  | hypo → RNA → hypo →                                                        |
| Sha-1-9  | NC_007168.1       | - | 1640536 | 1640425 | hypo → RNA → hypo →                                                        |
| Sha-1-10 | NC_007168.1       | + | 1150313 | 1150425 | hypo → RNA → ARA1 (COG0656) →                                              |
| Sha-1-11 | NC_007168.1       | + | 618527  | 618639  | AraJ (COG2814) → RNA→ ←PnbA (COG2272)                                      |
| Sha-1-12 | NC_007168.1       | - | 2443450 | 2443338 | LdcC (COG1982) → RNA→ FtsX (pfam02687) →                                   |
| Sha-1-13 | NC_007168.1       | - | 385942  | 385830  | ←CitMHS (pfam03600) RNA→ ←hypo                                             |
| Sha-1-14 | NC_007168.1       | - | 2264744 | 2264632 | PitA (COG0306) → RNA→ ←LysM (cd00118)COG3942 (COG3942)LysM (pfam01476)     |
| Sha-1-15 | NC_007168.1       | - | 561630  | 561518  | COG2514 (COG2514) → RNA→ ←PhnD (COG3221)                                   |
| Sha-1-16 | NC_007168.1       | - | 2065977 | 2065865 | Ndh (COG1252) → RNA→ Peptidase_M17 (cd00433) →                             |
| Sha-1-17 | NC_007168.1       | + | 448710  | 448825  | BetA (COG2303) → RNA→ XynB (COG3664)HTH_ARAC (smart00342) →                |
| Sha-1-18 | NC_007168.1       | - | 658143  | 658031  | hypo → RNA → ←GpmA (COG0588)                                               |
| Sha-1-19 | NC_007168.1       | - | 2227722 | 2227611 | TlyC (COG1253) → RNA→ ARA1 (COG0656) →                                     |
| Sha-1-20 | NC_007168.1       | + | 319416  | 319527  | PhnD (COG3221) → RNA→ COG3638 (COG3638) →                                  |
| Sha-1-21 | NC_007168.1       | + | 2112362 | 2112462 | hypo → RNA → hypo →                                                        |
| Sha-1-22 | NC_007168.1       | + | 235915  | 236015  | RarD (COG2962) → RNA→ ←hypo                                                |
| Sha-1-23 | NC_007168.1       | + | 2229556 | 2229656 | ←TlyC (COG1253) RNA→ ←FruA (COG1299)PtsN (COG1762)PTS_IIB_fruc (pfam02379) |
| Sha-1-24 | NC_007168.1       | - | 239998  | 239898  | ←hypo RNA→ ←TagB (COG1887)                                                 |

|          |                   |   |         |         |                                                                                    |
|----------|-------------------|---|---------|---------|------------------------------------------------------------------------------------|
| Sha-1-25 | NC_007168.1       | - | 2172032 | 2171921 | COG1544 (COG1544)→ RNA→ SecA (COG0653)SEC-C (pfam02810)→                           |
| Sau-6-7  | NC_002953.3       | + | 654232  | 654337  | ArgS (COG0018)→ RNA→ COG2231 (COG2231)→                                            |
| Sau-11-5 | NC_007793.1       | + | 671024  | 671129  | RNA→                                                                               |
| Sau-10-5 | NC_007795.1       | + | 603819  | 603924  | RNA→ ←ElaA (COG2153)                                                               |
| Sau-2-5  | NC_002951.2       | + | 692494  | 692599  | RNA→ MdoB (COG1368)→                                                               |
| Sau-7-7  | NC_003923.1       | + | 655540  | 655645  | hypo→ RNA→ Rpe (COG0036)→                                                          |
| Sau-11-6 | NC_007793.1       | - | 787220  | 787115  | RNA→                                                                               |
| Sau-10-6 | NC_007795.1       | - | 720228  | 720123  | ElaA (COG2153)→ RNA→                                                               |
| Sau-2-6  | NC_002951.2       | - | 808765  | 808660  | ←COG4502 (COG4502) RNA→ ←HisC (COG0079)                                            |
| Sau-8-8  | NC_002758.2       | + | 801531  | 801636  | RNA→                                                                               |
| Sau-9-8  | NC_002745.2       | + | 777338  | 777443  | COG4502 (COG4502)→ RNA→ ←LCB5 (COG1597)                                            |
| Sau-3-8  | NZ_AAPK01000003.1 | + | 63146   | 63251   | RNA→                                                                               |
| Sau-4-8  | NZ_AAPL01000004.1 | - | 22131   | 22026   | RNA→                                                                               |
| Sau-6-8  | NC_002953.3       | + | 406548  | 406653  | hypo→ RNA→ ←putative DNA-binding protein                                           |
| Sau-7-8  | NC_003923.1       | + | 407903  | 408008  | hypo→ RNA→ ←hypo                                                                   |
| Sau-5-9  | NC_002952.2       | + | 2259183 | 2259288 | ←hypo RNA→ ←ATP-synt_DE_N (pfam02823)                                              |
| Sau-5-10 | NC_002952.2       | - | 2726948 | 2726843 | ←CopZ (COG2608) RNA→ ←HMA (cd00371)ZntA (COG2217)                                  |
| Sha-1-26 | NC_007168.1       | + | 771339  | 771448  | COG2427 (COG2427)→ RNA→ LytD (COG4193)→                                            |
| Sha-1-27 | NC_007168.1       | + | 537863  | 537972  | PTS_IIA_glc (cd00210)PTS_IIB_glc (cd00212)PtsG (COG1263)→ RNA→ ←Tdh (COG1063)      |
| Sha-1-28 | NC_007168.1       | - | 2183225 | 2183115 | hypo→ RNA→ Gly_kinase (pfam02595)→                                                 |
| Sha-1-29 | NC_007168.1       | - | 2644338 | 2644224 | ←COG1878 (COG1878) RNA→ ←Methionine_synt (pfam01717)CIMS_N_terminal_like (cd03312) |
| Ssa-1-6  | NC_007350.1       | - | 1730753 | 1730634 | PPAT_a (cd02163)→ RNA→ ←DUF795 (pfam05636)                                         |
| Sha-1-30 | NC_007168.1       | + | 967841  | 967952  | FliA (COG1191)→ RNA→ Tex (COG2183)→                                                |
| Sep-2-1  | NC_006663.1       | - | 14712   | 14592   | hypo→ RNA→ ABC_DR_subfamily_A (cd03230)→                                           |
| Sha-1-31 | NC_007168.1       | + | 2257974 | 2258044 | CIMS_C_terminal_like (cd03311)→ RNA→ ←DUF985 (pfam06172)                           |
| Sha-1-32 | NC_007168.1       | + | 145933  | 146003  | Branch_AA_trans (pfam05525)→ RNA→ UbiE (COG2226)→                                  |
| Sha-1-33 | NC_007168.1       | + | 1895371 | 1895460 | hypo→ RNA→ Nramp (pfam01566)→                                                      |
| Lre-2-1  | NZ_AAOV01000001.1 | + | 718     | 787     | PnuC (COG3201)→ RNA→ ←ARA1 (COG0656)                                               |
| Lre-2-2  | NZ_AAOV01000004.1 | - | 53960   | 53891   | FbpA (pfam05833)DUF814 (pfam05670)→ RNA→ ←CarB (COG0458)CPSase_L_D3 (pfam02787)    |
| Lre-2-3  | NZ_AAOV01000006.1 | - | 42693   | 42624   | COG3919 (COG3919)→ RNA→ Peptidase_S26 (pfam00461)→                                 |
| Lre-2-4  | NZ_AAOV01000025.1 | - | 15557   | 15488   | RNA→                                                                               |
| Lre-1-1  | NZ_AAPZ01000007.1 | + | 23274   | 23343   | COG3919 (COG3919)→ RNA→ Peptidase_S26 (pfam00461)→                                 |
| Lre-1-2  | NZ_AAPZ01000009.1 | + | 38129   | 38198   | COG5549 (COG5549)→ RNA→ ←ZntA (COG2217)                                            |
| Lre-1-3  | NZ_AAPZ01000004.1 | - | 26250   | 26181   | PspC (COG1983)→ RNA→ ←Transposase_9 (pfam01548)Transposase_20 (pfam02371)          |
| Sha-1-34 | NC_007168.1       | - | 710586  | 710488  | TagB (COG1887)→ RNA→ ←Acetyltransf_1 (pfam00583)                                   |
| Sha-1-35 | NC_007168.1       | + | 1400040 | 1400149 | RpmG (COG0267)→ RNA→ 5-F'THF_cyc_lig (pfam01812)→                                  |
| Spn-2-1  | NC_003028.1       | + | 1340542 | 1340648 | ←RimL (COG1670) RNA→ ←NadE (COG0171)                                               |
| Spn-2-2  | NZ_AAGY02000113.1 | - | 5545    | 5439    | RNA→                                                                               |
| Sha-1-36 | NC_007168.1       | + | 2548059 | 2548170 | ←COG3153 (COG3153) RNA→ ←PhnF (COG2188)                                            |
| Sha-1-37 | NC_007168.1       | + | 1096325 | 1096425 | MdlB (COG1132)→ RNA→ ←COG4129 (COG4129)                                            |
| Lre-2-5  | NZ_AAOV01000041.1 | + | 13371   | 13483   | hypo (cons)→ RNA→ ←hypo (cons)                                                     |
| Lre-2-6  | NZ_AAOV01000036.1 | - | 15859   | 15747   | RpsA (COG0539)→ RNA→ COG1160 (COG1160)→                                            |
| Spn-1-1  | NC_003098.1       | + | 1271252 | 1271372 | ←RimL (COG1670) RNA→ ←NadE (COG0171)                                               |

|          |                   |   |         |         |                                                                                      |
|----------|-------------------|---|---------|---------|--------------------------------------------------------------------------------------|
| Lre-1-4  | NZ_AAPZ01000004.1 | + | 31872   | 32005   | rve (pfam00665) → RNA → ← Transposase_9 (pfam01548) Transposase_20 (pfam02371)       |
| Lre-1-5  | NZ_AAPZ01000013.1 | - | 33113   | 33001   | ← MrcB (COG0744) RNA → ← ArgS (COG0018)                                              |
| Lre-2-7  | NZ_AAOV01000004.1 | - | 53960   | 53848   | FbpA (pfam05833) DUF814 (pfam05670) → RNA → ← CarB (COG0458) CPSase_L.D3 (pfam02787) |
| Lre-1-6  | NZ_AAPZ01000037.1 | - | 5235    | 5123    | PemK (pfam02452) → RNA → ← hypo                                                      |
| Lre-2-8  | NZ_AAOV01000011.1 | - | 2891    | 2778    | Gly_kinase (pfam02595) → RNA → hypo →                                                |
| Lre-2-9  | NZ_AAOV01000010.1 | - | 2671    | 2560    | COG3001 (COG3001) → RNA → ← Dtyr_deacylase (cd00563)                                 |
| Lre-2-10 | NZ_AAOV01000006.1 | + | 1455    | 1567    | AsnS (COG0017) → RNA → ← EAL (cd01948)                                               |
| Lre-2-11 | NZ_AAOV01000003.1 | - | 9042    | 8930    | PerM (COG0628) → RNA → ← COG3382 (COG3382)                                           |
| Lre-1-7  | NZ_AAPZ01000003.1 | - | 6328    | 6213    | ← TpiA (COG0149) RNA → ← SrtA (COG3764)                                              |
| Lre-1-8  | NZ_AAPZ01000002.1 | - | 39785   | 39670   | ApbA (COG1893) → RNA → ← Uup (COG0488)                                               |
| Lre-1-9  | NZ_AAPZ01000016.1 | + | 12635   | 12745   | ← COG0062 (COG0062) RNA → ← ErfK_YbiS_YhnG (pfam03734)                               |
| Lre-2-12 | NZ_AAOV01000017.1 | - | 1140    | 1028    | HINT_subgroup (cd01277) → RNA → ← SurA (COG0760)                                     |
| Lre-1-10 | NZ_AAPZ01000018.1 | + | 11003   | 11115   | ABC_MTABC3_MDL1_MDL2 (cd03249) → RNA → ← COG1765 (COG1765)                           |
| Lre-1-11 | NZ_AAPZ01000020.1 | + | 23426   | 23538   | ← hypo (cons) RNA → ← hypo (cons)                                                    |
| Lre-2-13 | NZ_AAOV01000017.1 | + | 24380   | 24492   | ← Tra8 (COG2826) RNA → Glutaminase (pfam04960) →                                     |
| Lre-2-14 | NZ_AAOV01000026.1 | - | 4700    | 4587    | DegQ (COG0265) → RNA → PgpA (COG1267) →                                              |
| Lre-2-15 | NZ_AAOV01000001.1 | + | 61513   | 61625   | GldA (COG0371) → RNA → ← DUF915 (pfam06028)                                          |
| Lre-1-12 | NZ_AAPZ01000016.1 | - | 18411   | 18299   | GldA (COG0371) → RNA → ← DUF915 (pfam06028)                                          |
| Lre-2-16 | NZ_AAOV01000060.1 | - | 5015    | 4903    | ← COG3830 (COG3830) RNA → ← ARA1 (COG0656)                                           |
| Lre-1-13 | NZ_AAPZ01000069.1 | + | 5451    | 5563    | COG2848 (COG2848) → RNA → ← Transposase_20 (pfam02371)                               |
| Lre-2-17 | NZ_AAOV01000001.1 | + | 88090   | 88223   | ThrS (COG0441) → RNA → ← COG2270 (COG2270)                                           |
| Lre-2-18 | NZ_AAOV01000025.1 | - | 15557   | 15424   | RNA →                                                                                |
| Lre-1-14 | NZ_AAPZ01000009.1 | + | 38129   | 38262   | COG5549 (COG5549) → RNA → ← ZntA (COG2217)                                           |
| Lre-1-15 | NZ_AAPZ01000007.1 | + | 23274   | 23407   | COG3919 (COG3919) → RNA → Peptidase_S26 (pfam00461) →                                |
| Lre-1-16 | NZ_AAPZ01000031.1 | - | 17594   | 17461   | RhaT (COG0697) → RNA → UPF0236 (pfam06782) →                                         |
| Lre-1-17 | NZ_AAPZ01000025.1 | - | 14089   | 13956   | ← PseudoU_synth_EcTruB (cd02573) RNA → ← RbfA (COG0858)                              |
| Lre-2-19 | NZ_AAOV01000012.1 | + | 17456   | 17588   | ← PseudoU_synth_EcTruB (cd02573) RNA → ← RbfA (COG0858)                              |
| Sha-1-38 | NC_007168.1       | + | 2134361 | 2134471 | ← RNA → ← SmpB (COG0691)                                                             |
| Sep-2-2  | NC_002976.3       | + | 312121  | 312238  | COG3949 (COG3949) → RNA → Aes (COG0657) →                                            |
| Sep-1-1  | NC_004461.1       | + | 419003  | 419120  | RNA →                                                                                |
| Ssu-1-6  | NZ_AAFA02000044.1 | + | 11502   | 11623   | beta_clamp (cd00140) → RNA → LCB5 (COG1597) →                                        |
| Ssu-1-7  | NZ_AAFA02000003.1 | - | 49970   | 49849   | GidB (COG0357) → RNA → ← CSD (pfam00313)                                             |
| Ssu-1-8  | NZ_AAFA02000034.1 | - | 13769   | 13649   | Peptidase_M29 (pfam02073) → RNA → COG2261 (COG2261) →                                |
| Ssu-1-9  | NZ_AAFA02000040.1 | + | 6049    | 6169    | DnaJ (COG0484) → RNA → LplA (COG0095) →                                              |
| Ssu-1-10 | NZ_AAFA02000003.1 | - | 61546   | 61426   | ← PriA (COG1198) RNA → ← RpoZ (COG1758)                                              |
| Ssu-1-11 | NZ_AAFA02000051.1 | + | 6544    | 6664    | RNA →                                                                                |
| Ssu-1-12 | NZ_AAFA02000091.1 | - | 5755    | 5635    | Acetyltransf_1 (pfam00583) → RNA → ← HMG-CoA_reductase_classII (cd00644)             |
| Ssu-1-13 | NZ_AAFA02000150.1 | - | 2679    | 2558    | hypo → RNA → HisS (COG0124) →                                                        |
| Ssu-1-14 | NZ_AAFA02000032.1 | - | 15069   | 14949   | RNA → ← MscL (pfam01741)                                                             |
| Ssu-1-15 | NZ_AAFA02000054.1 | - | 7664    | 7543    | Rfe (COG0472) → RNA → SufC (COG0396) →                                               |
| Ssu-1-16 | NZ_AAFA02000001.1 | - | 5925    | 5808    | PBPb (smart00062) → RNA → ← GlgB (COG0296)                                           |
| Ssu-1-17 | NZ_AAFA02000091.1 | + | 4201    | 4321    | PksG (COG3425) → RNA → HMG-CoA_reductase_classII (cd00644) →                         |
| Ssu-1-18 | NZ_AAFA02000049.1 | + | 507     | 626     | COG2246 (COG2246) → RNA → ← Rbn (COG1295)                                            |

|          |                   |   |         |         |                                                                       |
|----------|-------------------|---|---------|---------|-----------------------------------------------------------------------|
| Ssu-1-19 | NZ_AAFA02000002.1 | + | 19861   | 19979   | ←COG1193 (COG1193) RNA→ ←Colicin_V (pfam02674)                        |
| Ssu-1-20 | NZ_AAFA02000059.1 | - | 9360    | 9242    | COG2141 (COG2141)→ RNA→ ←COG3335 (COG3335)                            |
| Ssu-1-21 | NZ_AAFA02000018.1 | + | 14581   | 14681   | COG1079 (COG1079)→ RNA→ ←COG3547 (COG3547) Transposase_20 (pfam02371) |
| Lre-2-20 | NZ_AAOV01000016.1 | - | 5380    | 5307    | ATP-synt_DE_N (pfam02823)→ RNA→ MurA (COG0766)→                       |
| Lre-2-21 | NZ_AAOV01000038.1 | - | 2197    | 2119    | AAL_decarboxy (pfam03306)→ RNA→ PurE (COG0041)→                       |
| Sag-5-2  | NZ_AAJQ01000032.1 | - | 13163   | 13049   | ←COG1247 (COG1247) RNA→ COG1476 (COG1476)→                            |
| Sag-2-2  | NC_004116.1       | - | 40430   | 40306   | ←NanE (COG3010) RNA→                                                  |
| Sag-1-2  | NZ_AAJO01000054.1 | + | 1255    | 1379    | RNA→                                                                  |
| Sag-3-2  | NZ_AAJP01000052.1 | + | 5507    | 5631    | ←PurF (COG0034) RNA→ ←PurL (COG0046)PurL (COG0047)                    |
| Ssu-1-22 | NZ_AAFA02000103.1 | + | 1904    | 2014    | ←Adenine_glyco (pfam03352) RNA→ ←RuvA (COG0632)                       |
| Sth-3-1  | NC_006448.1       | + | 1151674 | 1151793 | ←DHDPS (cd00950) RNA→ ←Asd (COG0136)                                  |
| Sth-1-1  | NC_006449.1       | + | 1149545 | 1149664 | RNA→                                                                  |
| Sth-2-1  | NZ_AAGS01000021.1 | + | 13313   | 13432   | ←DHDPS (cd00950) RNA→ ←Asd (COG0136)                                  |
| Lre-2-22 | NZ_AAOV01000048.1 | - | 3412    | 3278    | hypo→ RNA→ ←Pgi (COG0166)                                             |
| Smu-1-2  | NC_004350.1       | + | 1243949 | 1244087 | ←hypo RNA→ ←COG4947 (COG4947)                                         |
| Sha-1-39 | NC_007168.1       | + | 2199672 | 2199818 | PTR2 (COG3104)→ RNA→ LCB5 (COG1597)→                                  |
| Ssa-1-7  | NC_007350.1       | - | 2428806 | 2428635 | ←DUF867 (pfam05908) RNA→ ←Glyoxalase (pfam00903)                      |

**cd00118** Lysin domain, found in a variety of enzymes involved in bacterial cell wall degradation.

**cd00140** Beta clamp domain.

**cd00210** PTS\_IIA, PTS system, glucose/sucrose specific IIA subunit.

**cd00212** PTS\_IIB, PTS system, glucose/sucrose specific IIB subunit.

**cd00318** Phosphoglycerate kinase (PGK) is a monomeric enzyme which catalyzes the transfer of the high-energy phosphate group of 1,3-bisphosphoglycerate to ADP, forming ATP and 3-phosphoglycerate.

**cd00371** Heavy-metal-associated domain (HMA) is a conserved domain of approximately 30 amino acid residues found in a number of proteins that transport or detoxify heavy metals, for example, the CPx-type heavy metal ATPases and copper chaperones.

**cd00433** Cytosol aminopeptidase family, N-terminal and catalytic domains.

**cd00563** D-Tyrosyl-tRNA<sub>Tyr</sub> deacylases; a class of tRNA-dependent hydrolases which are capable of hydrolyzing the ester bond of D-Tyrosyl-tRNA reducing the level of cellular D-Tyrosine while recycling the peptidyl-tRNA; found in bacteria and in eukaryotes but not in archaea; beta barrel-like fold structure; forms homodimers in which two surface cavities serve as the active site for tRNA binding

**cd00644** Hydroxymethylglutaryl-coenzyme A (HMG-CoA) reductase (HMGR), class II, prokaryotic enzyme is a homodimer.

**cd00950** Dihydrodipicolinate synthase (DHDPS) is a key enzyme in lysine biosynthesis.

**cd01277** HINT (histidine triad nucleotide-binding protein) subgroup: Members of this CD belong to the superfamily of histidine triad hydrolases that act on alpha-phosphate of ribonucleotides.

**cd01288** FabZ is a 17kD beta-hydroxyacyl-acyl carrier protein (ACP) dehydratase that primarily catalyzes the dehydration of beta-hydroxyacyl-ACP to trans-2-acyl-ACP, the third step in the elongation phase of the bacterial/ plastid, type II, fatty-acid biosynthesis pathway.

**cd01840** yrhL-like subfamily of SGNH-hydrolases, a diverse family of lipases and esterases.

**cd01948** EAL domain.

**cd02000** Thiamine pyrophosphate (TPP) family, E1 of PDC\_ADC\_BCADC subfamily, TPP-binding module; composed of proteins similar to the E1 components of the human pyruvate dehydrogenase complex (PDC), the acetoin dehydrogenase complex (ADC) and the branched chain alpha-keto acid dehydrogenase/2-oxoisovalerate dehydrogenase complex (BCADC).

**cd02163** Phosphopantetheine adenylyltransferase (PPAT) is an essential enzyme in bacteria that catalyses a rate-limiting step in coenzyme A (CoA) biosynthesis, by transferring an adenylyl group from ATP to 4'-phosphopantetheine, yielding dephospho-CoA (dPCoA).

**cd02573** PseudoU\_synth\_EcTruB: Pseudouridine synthase, Escherichia coli TruB like.

**cd03230** This family of ATP-binding proteins belongs to a multisubunit transporter involved in drug resistance (BcrA and DrrA), nodulation, lipid transport, and lantibiotic immunity.

**cd03249** MTABC3 (also known as ABCB6) is a mitochondrial ATP-binding cassette protein involved in iron homeostasis and one of four ABC transporters expressed in

the mitochondrial inner membrane, the other three being MDL1(ABC7), MDL2, and ATM1.

**cd03278** Barmotin is a tight junction-associated protein expressed in rat epithelial cells which is thought to have an important regulatory role in tight junction barrier function.

**cd03311** CIMS - Cobalamine-independent methionine synthase, or MetE, C-terminal domain\_like.

**cd03312** CIMS - Cobalamine-independent methionine synthase, or MetE, N-terminal domain\_like.

**cd03313** Enolase: Enolases are homodimeric enzymes that catalyse the reversible dehydration of 2-phospho-D-glycerate to phosphoenolpyruvate as part of the glycolytic and gluconeogenesis pathways.

**COG0017** Aspartyl/asparaginyl-tRNA synthetases [Translation, ribosomal structure and biogenesis]

**COG0018** Arginyl-tRNA synthetase [Translation, ribosomal structure and biogenesis]

**COG0022** Pyruvate/2-oxoglutarate dehydrogenase complex, dehydrogenase (E1) component, eukaryotic type, beta subunit [Energy production and conversion]

**COG0034** Glutamine phosphoribosylpyrophosphate amidotransferase [Nucleotide transport and metabolism]

**COG0036** Pentose-5-phosphate-3-epimerase [Carbohydrate transport and metabolism]

**COG0041** Phosphoribosylcarboxyaminoimidazole (NCAIR) mutase [Nucleotide transport and metabolism]

**COG0046** Phosphoribosylformylglycinamide (FGAM) synthase, synthetase domain [Nucleotide transport and metabolism]

**COG0047** Phosphoribosylformylglycinamide (FGAM) synthase, glutamine amidotransferase domain [Nucleotide transport and metabolism]

**COG0062** Uncharacterized conserved protein [Function unknown]

**COG0079** Histidinol-phosphate/aromatic aminotransferase and cobyric acid decarboxylase [Amino acid transport and metabolism]

**COG0085** DNA-directed RNA polymerase, beta subunit/140 kD subunit [Transcription]

**COG0095** Lipoate-protein ligase A [Coenzyme metabolism]

**COG0097** Ribosomal protein L6P/L9E [Translation, ribosomal structure and biogenesis]

**COG0124** Histidyl-tRNA synthetase [Translation, ribosomal structure and biogenesis]

**COG0136** Aspartate-semialdehyde dehydrogenase [Amino acid transport and metabolism]

**COG0148** Enolase [Carbohydrate transport and metabolism]

**COG0149** Triosephosphate isomerase [Carbohydrate transport and metabolism]

**COG0151** Phosphoribosylamine-glycine ligase [Nucleotide transport and metabolism]

**COG0166** Glucose-6-phosphate isomerase [Carbohydrate transport and metabolism]

**COG0171** NAD synthase [Coenzyme metabolism]

**COG0190** 5,10-methylene-tetrahydrofolate dehydrogenase/Methenyl tetrahydrofolate cyclohydrolase [Coenzyme metabolism]

**COG0236** Acyl carrier protein [Lipid metabolism / Secondary metabolites biosynthesis, transport, and catabolism]

**COG0253** Diaminopimelate epimerase [Amino acid transport and metabolism]

**COG0265** Trypsin-like serine proteases, typically periplasmic, contain C-terminal PDZ domain [Posttranslational modification, protein turnover, chaperones]

**COG0267** Ribosomal protein L33 [Translation, ribosomal structure and biogenesis]

**COG0296** 1,4-alpha-glucan branching enzyme [Carbohydrate transport and metabolism]

**COG0306** Phosphate/sulphate permeases [Inorganic ion transport and metabolism]

**COG0357** Predicted S-adenosylmethionine-dependent methyltransferase involved in bacterial cell division [Cell envelope biogenesis, outer membrane]

**COG0371** Glycerol dehydrogenase and related enzymes [Energy production and conversion]

**COG0381** UDP-N-acetylglucosamine 2-epimerase [Cell envelope biogenesis, outer membrane]

**COG0396** ABC-type transport system involved in Fe-S cluster assembly, ATPase component [Posttranslational modification, protein turnover, chaperones]

**COG0441** Threonyl-tRNA synthetase [Translation, ribosomal structure and biogenesis]

**COG0453** Carbamoylphosphate synthase large subunit (split gene in MJ) [Amino acid transport and metabolism / Nucleotide transport and metabolism]

**COG0472** UDP-N-acetylmuramyl pentapeptide phosphotransferase/UDP-N-acetylglucosamine-1-phosphate transferase [Cell envelope biogenesis, outer membrane]

**COG0475** Kef-type K+ transport systems, membrane components [Inorganic ion transport and metabolism]

**COG0484** DnaJ-class molecular chaperone with C-terminal Zn finger domain [Posttranslational modification, protein turnover, chaperones]

**COG0488** ATPase components of ABC transporters with duplicated ATPase domains [General function prediction only]

**COG0508** Pyruvate/2-oxoglutarate dehydrogenase complex, dihydrolipoamide acyltransferase (E2) component, and related enzymes [Energy production and conversion]

**COG0539** Ribosomal protein S1 [Translation, ribosomal structure and biogenesis]

**COG0569** K+ transport systems, NAD-binding component [Inorganic ion transport and metabolism]

**COG0588** Phosphoglycerate mutase 1 [Carbohydrate transport and metabolism]

**COG0595** Predicted hydrolase of the metallo-beta-lactamase superfamily [General function prediction only]



**COG0623** Enoyl-[acyl-carrier-protein] [acyl-carrier-protein]  
**COG0624** Acetylornithine deacetylase/Succinyl-diaminopimelate desuccinylase and related deacylases [Amino acid transport and metabolism]  
**COG0628** Predicted permease [General function prediction only]  
**COG0632** Holliday junction resolvase, DNA-binding subunit [DNA replication, recombination, and repair]  
**COG0653** Preprotein translocase subunit SecA (ATPase, RNA helicase) [Intracellular trafficking and secretion]  
**COG0656** Aldo/keto reductases, related to diketogulonate reductase [General function prediction only]  
**COG0657** Esterase/lipase [Lipid metabolism]  
**COG0691** tmRNA-binding protein [Posttranslational modification, protein turnover, chaperones]  
**COG0697** Permeases of the drug/metabolite transporter (DMT) superfamily [Carbohydrate transport and metabolism / Amino acid transport and metabolism / General function prediction only]  
**COG0716** Flavodoxins [Energy production and conversion]  
**COG0735** Fe<sup>2+</sup>/Zn<sup>2+</sup> uptake regulation proteins [Inorganic ion transport and metabolism]  
**COG0744** Membrane carboxypeptidase (penicillin-binding protein) [Cell envelope biogenesis, outer membrane]  
**COG0760** Parvulin-like peptidyl-prolyl isomerase [Posttranslational modification, protein turnover, chaperones]  
**COG0766** UDP-N-acetylglucosamine enolpyruvyl transferase [Cell envelope biogenesis, outer membrane]  
**COG0858** Ribosome-binding factor A [Translation, ribosomal structure and biogenesis]  
**COG1012** NAD-dependent aldehyde dehydrogenases [Energy production and conversion]  
**COG1063** Threonine dehydrogenase and related Zn-dependent dehydrogenases [Amino acid transport and metabolism / General function prediction only]  
**COG1079** Uncharacterized ABC-type transport system, permease component [General function prediction only]  
**COG1116** ABC-type nitrate/sulfonate/bicarbonate transport system, ATPase component [Inorganic ion transport and metabolism]  
**COG1132** ABC-type multidrug transport system, ATPase and permease components [Defense mechanisms]  
**COG1159** GTPase [General function prediction only]  
**COG1160** Predicted GTPases [General function prediction only]  
**COG1191** DNA-directed RNA polymerase specialized sigma subunit [Transcription]  
**COG1193** Mismatch repair ATPase (MutS family) [DNA replication, recombination, and repair]  
**COG1198** Primosomal protein N' (replication factor Y) - superfamily II helicase [DNA replication, recombination, and repair]  
**COG1247** Sortase and related acyltransferases [Cell envelope biogenesis, outer membrane]  
**COG1249** Pyruvate/2-oxoglutarate dehydrogenase complex, dihydrolipoamide dehydrogenase (E3) component, and related enzymes [Energy production and conversion]  
**COG1252** NADH dehydrogenase, FAD-containing subunit [Energy production and conversion]  
**COG1253** Hemolysins and related proteins containing CBS domains [General function prediction only]  
**COG1263** Phosphotransferase system IIC components, glucose/maltose/N-acetylglucosamine-specific [Carbohydrate transport and metabolism]  
**COG1267** Phosphatidylglycerophosphatase A and related proteins [Lipid metabolism]  
**COG1295** Predicted membrane protein [Function unknown]  
**COG1299** Phosphotransferase system, fructose-specific IIC component [Carbohydrate transport and metabolism]  
**COG1368** Phosphoglycerol transferase and related proteins, alkaline phosphatase superfamily [Cell envelope biogenesis, outer membrane]  
**COG1454** Alcohol dehydrogenase, class IV [Energy production and conversion]  
**COG1476** Predicted transcriptional regulators [Transcription]  
**COG1544** Ribosome-associated protein Y (PSrp-1) [Translation, ribosomal structure and biogenesis]  
**COG1597** Sphingosine kinase and enzymes related to eukaryotic diacylglycerol kinase [Lipid metabolism / General function prediction only]  
**COG1670** Acetyltransferases, including N-acetylases of ribosomal proteins [Translation, ribosomal structure and biogenesis]  
**COG1674** DNA segregation ATPase FtsK/SpoIIIE and related proteins [Cell division and chromosome partitioning]  
**COG1758** DNA-directed RNA polymerase, subunit K/omega [Transcription]  
**COG1762** Phosphotransferase system mannitol/fructose-specific IIA domain (Ntr-type) [Carbohydrate transport and metabolism / Signal transduction mechanisms]  
**COG1765** Predicted redox protein, regulator of disulfide bond formation [Posttranslational modification, protein turnover, chaperones]  
**COG1835** Predicted acyltransferases [Lipid metabolism]  
**COG1846** Transcriptional regulators [Transcription]  
**COG1878** Predicted metal-dependent hydrolase [General function prediction only]  
**COG1887** Putative glycosyl/glycerophosphate transferases involved in teichoic acid biosynthesis TagF/TagB/EpsJ/RodC [Cell envelope biogenesis, outer membrane]  
**COG1893** Ketopantoate reductase [Coenzyme metabolism]

**COG1914** Mn<sup>2+</sup> and Fe<sup>2+</sup> transporters of the NRAMP family [Inorganic ion transport and metabolism]  
**COG1982** Arginine/lysine/ornithine decarboxylases [Amino acid transport and metabolism]  
**COG1983** Putative stress-responsive transcriptional regulator [Transcription / Signal transduction mechanisms]  
**COG2141** Coenzyme F420-dependent N<sub>5</sub>,N<sub>10</sub>-methylene tetrahydromethanopterin reductase and related flavin-dependent oxidoreductases [Energy production and conversion]  
**COG2153** Predicted acyltransferase [General function prediction only]  
**COG2183** Transcriptional accessory protein [Transcription]  
**COG2188** Transcriptional regulators [Transcription]  
**COG2217** Cation transport ATPase [Inorganic ion transport and metabolism]  
**COG2223** Nitrate/nitrite transporter [Inorganic ion transport and metabolism]  
**COG2226** Methylase involved in ubiquinone/menaquinone biosynthesis [Coenzyme metabolism]  
**COG2231** Uncharacterized protein related to Endonuclease III [DNA replication, recombination, and repair]  
**COG2246** Predicted membrane protein [Function unknown]  
**COG2261** Predicted membrane protein [Function unknown]  
**COG2270** Permeases of the major facilitator superfamily [General function prediction only]  
**COG2272** Carboxylesterase type B [Lipid metabolism]  
**COG2303** Choline dehydrogenase and related flavoproteins [Amino acid transport and metabolism]  
**COG2374** Predicted extracellular nuclease [General function prediction only]  
**COG2427** Uncharacterized conserved protein [Function unknown]  
**COG2514** Predicted ring-cleavage extradiol dioxygenase [General function prediction only]  
**COG2608** Copper chaperone [Inorganic ion transport and metabolism]  
**COG2814** Arabinose efflux permease [Carbohydrate transport and metabolism]  
**COG2826** Transposase and inactivated derivatives, IS30 family [DNA replication, recombination, and repair]  
**COG2848** Uncharacterized conserved protein [Function unknown]  
**COG2962** Predicted permeases [General function prediction only]  
**COG3001** Uncharacterized protein conserved in bacteria [Function unknown]  
**COG3010** Putative N-acetylmannosamine-6-phosphate epimerase [Carbohydrate transport and metabolism]  
**COG3104** Dipeptide/tripeptide permease [Amino acid transport and metabolism]  
**COG3153** Predicted acyltransferase [General function prediction only]  
**COG3201** Nicotinamide mononucleotide transporter [Coenzyme metabolism]  
**COG3221** ABC-type phosphate/phosphonate transport system, periplasmic component [Inorganic ion transport and metabolism]  
**COG3335** Transposase and inactivated derivatives [DNA replication, recombination, and repair]  
**COG3382** Uncharacterized conserved protein [Function unknown]  
**COG3425** 3-hydroxy-3-methylglutaryl CoA synthase [Lipid metabolism]  
**COG3464** Transposase and inactivated derivatives [DNA replication, recombination, and repair]  
**COG3527** Alpha-acetolactate decarboxylase [Secondary metabolites biosynthesis, transport, and catabolism]  
**COG3547** Transposase and inactivated derivatives [DNA replication, recombination, and repair]  
**COG3607** Predicted lactoylglutathione lyase [General function prediction only]  
**COG3638** ABC-type phosphate/phosphonate transport system, ATPase component [Inorganic ion transport and metabolism]  
**COG3664** Beta-xylosidase [Carbohydrate transport and metabolism]  
**COG3764** Sortase (surface protein transpeptidase) [Cell envelope biogenesis, outer membrane]  
**COG3830** ACT domain-containing protein [Signal transduction mechanisms]  
**COG3919** Predicted ATP-grasp enzyme [General function prediction only]  
**COG3942** Surface antigen [General function prediction only]  
**COG3949** Uncharacterized membrane protein [Function unknown]  
**COG4108** Peptide chain release factor RF-3 [Translation, ribosomal structure and biogenesis]  
**COG4120** ABC-type uncharacterized transport system, permease component [General function prediction only]  
**COG4129** Predicted membrane protein [Function unknown]  
**COG4193** Beta- N-acetylglucosaminidase [Carbohydrate transport and metabolism]  
**COG4502** Uncharacterized protein conserved in bacteria [Function unknown]  
**COG4606** ABC-type enterochelin transport system, permease component [Inorganic ion transport and metabolism]  
**COG4947** Uncharacterized protein conserved in bacteria [Function unknown]  
**COG5504** Predicted Zn-dependent protease [Posttranslational modification, protein turnover, chaperones]  
**COG5549** Predicted Zn-dependent protease [Posttranslational modification, protein turnover, chaperones]  
**pfam00106** short chain dehydrogenase.  
**pfam00313** 'Cold-shock' DNA-binding domain.  
**pfam00364** Biotin-requiring enzyme.  
**pfam00410** Ribosomal protein S8.  
**pfam00461** Signal peptidase I.









Ssu-1-1 ..... AGAC .GAC .GAAAUCAAUCAACUUUGUUG ..... AUU ..... ACUGAUUUC .UGUC .UUUCCG .CUA  
 Spy-8-1 ..... CGUC .UUC .GAAAUUC ..... AAA ..... GAUUUC .GGAC .UUACCU .CAU  
 Spy-4-1 ..... CGUC .UUC .GAAAUUC ..... AAA ..... GAUUUC .GGAC .UUACCG .CAU  
 Spy-11-1 ..... CGUC .UUC .GAAAUUC ..... AAA ..... GAUUUC .GGAC .UUACCG .CAU  
 Spy-10-1 ..... CAUC .UUC .GAAAUUC ..... AAA ..... GAUUUC .GGAC .UUACCG .CAU  
 Sag-8-1 ..... CAUC .UUC .GAAAUUC ..... AAA ..... GAUUUC .GGAC .UUACCG .CAU  
 Sag-6-1 ..... CGUC .UUC .GAAAUUC ..... AAA ..... GAUUUC .GGAC .UUACCG .CAU  
 Sag-4-1 ..... CGUC .UUC .GAAAUUC ..... AAA ..... GAUUUC .GGAC .UUACCG .CAU  
 Sag-2-1 ..... CGUC .UUC .GAAAUUC ..... AAA ..... GAUUUC .GGAC .UUACCG .CAU  
 Spy-8-2 ..... CGUC .AAC .GAAAUUC ..... AAA ..... GAUUUC .UGAC .UUACCG .CAA  
 Spy-9-2 ..... CGUC .AAC .GAAAUUC ..... AAA ..... GAUUUC .UGAC .UUACCG .CAA  
 Spy-5-2 ..... CGUC .AAC .GAAAUUC ..... AAA ..... GAUUUC .UGAC .UUACCG .CAA  
 Spy-10-2 ..... CGUC .AAC .GAAAUUC ..... AAA ..... GAUUUC .UGAC .UUACCG .CAA  
 Spy-4-2 ..... CGUC .AAC .GAAAUUC ..... AAA ..... GAUUUC .UGAC .UUACCG .CAA  
 Spy-8-3 ..... CGUC .AAC .GAAAUUC ..... AAA ..... GAUUUC .UGAC .UUACCG .CAA  
 Ssu-1-2 ..... CGUC .UGC .GAAAUUC ..... AAA ..... GAUUUC .GGAC .UUACCG .CUU  
 Ssu-1-3 ..... CGUC .AAC .GAAAUUC ..... AAA ..... GAUUUC .GGAC .UUACCG .CUU  
 Smu-1-1 ..... CGUC .AGC .GAAAUUC ..... AAA ..... GUUUUC .UGAU .UUACCGCCAU  
 Ssu-1-4 ..... CGUC .UAC .GAAAUUC ..... AAA ..... GAUUUC .GGAC .UUACCG .CUU  
 Ssu-1-5 ..... CGUC .UAC .GAAAUUC ..... AAU ..... GAUUUC .UGAC .UUACCG .CCU  
 Spy-8-4 ..... CGAC .GAC .GAAAUUCGCAUUCUAC ..... GAAUG ..... ACCGAUUUC .UGUC .UUACCG .UCU  
 Spy-12-3 ..... CGAC .GAC .GAAAUUCGCAUUCUAC ..... GAAUG ..... ACCGAUUUC .UGUC .UUACCG .UCU  
 Spy-3-3 ..... CGAC .GAC .GAAAUUCGCAUUCUAC ..... GAAUG ..... ACCGAUUUC .UGUC .UUACCG .CCU  
 Spy-11-3 ..... CGAC .GAC .GAAAUUCGCAUUCUAC ..... GAAUG ..... ACCGAUUUC .UGUC .UUACCG .UCU  
 Spy-9-3 ..... CGAC .GAC .GAAAUUCGCAUUCUAC ..... GAAUG ..... ACCGAUUUC .UGUC .UUACCG .UCU  
 Spy-4-3 ..... CGAC .GAC .GAAAUUCGCAUUCUAC ..... GAAUG ..... ACCGAUUUC .UGUC .UUACCG .CAA  
 Spy-10-3 ..... CGAC .GAC .GAAAUUCGCAUUCUAC ..... GAAUG ..... ACCGAUUUC .UGUC .UUACCG .CAA  
 Sau-6-1 ..... AUUC .UAA .GCAACCU ..... AGA ..... UAAGGUUCG .AGAA .UUUCUC .CCU  
 Sau-3-1 ..... AUUC .UAA .GCAACCU ..... AGA ..... UAAGGUUCG .AGAA .UUUCUC .CCU  
 Sau-11-1 ..... AUUC .UAA .GCAACCU ..... AGA ..... UAAGGUUCG .AGAA .UUUCUC .CCU  
 Sau-5-1 ..... AUUC .UAA .GCAACCU ..... AGA ..... UAAGGUUCG .AGAA .UUUCUC .CCU  
 Sau-11-2 ..... GGAC .GAC .GAAAUUAAUUUUUGCGA ..... AAA ..... UAUCAUUUC .UGUC .CCACUC .CCU  
 Sau-1-1 ..... GGAC .GAC .GAAAUUAAUUUUUGCGA ..... AAA ..... UAUCAUUUC .UGUC .CCACUC .CCU  
 Sau-1-2 ..... GGAC .GAC .GAAAUUAAUUUUUGCGA ..... AAA ..... UAUCAUUUC .UGUC .CCACUC .CCA  
 Sau-6-5 ..... GGAC .GAC .GAAAUUAAUUUUUGGAGA ..... AAA ..... UAUCAUUUC .UGUC .CCACUC .CCU  
 Sau-8-3 ..... GGAC .GAC .GAAAUUAAUUUUUGCGA ..... AAA ..... UAUCAUUUC .UGUC .CCACUC .CCA  
 Sau-8-4 ..... GGAC .GAC .GAAAUUAAUUUUUGCGA ..... AAA ..... UAUCAUUUC .UGUC .CCACUC .CCA  
 Sau-8-5 ..... GGAC .GAC .GAAAUUAAUUUUUGGAGA ..... AAA ..... UAUCAUUUC .UGUC .CCACUC .CCG  
 Sau-5-5 ..... GGAC .GAC .GAAAUUAAUUUUUGCGA ..... AAA ..... UAUCAUUUC .UGUC .CCACUC .CCU  
 Sau-5-6 ..... GGAC .GAC .GAAAUUAAUUUUUGCGA ..... AAA ..... AAUCAUUUC .UCUC .CCACUC .CCA  
 Sau-2-3 ..... GGAC .GAC .GAAAUUAAUUUUUACGA ..... AAA ..... UAUCAUUUC .UGUC .CCACUC .CCU  
 Sau-11-3 ..... GGAC .GAC .GAAAUUAAUUUUUACGA ..... AAA ..... UAUCAUUUC .UGUC .CCACUC .CCU  
 Sau-8-7 ..... GGAC .GAC .GAAAUUAAUUUUUACGA ..... AAA ..... UAUCAUUUC .UGUC .CCACUC .CCU  
 Sau-5-7 ..... GGAC .GAC .GAAAUUAAUUUUUACGA ..... AAA ..... UAUCAUUUC .UGUC .CCACUC .CCC  
 Sau-11-4 ..... GGAC .GAC .GAAAUUAAUUUUUGCUA ..... AAA ..... UAUGAUUUC .UGUC .CCACUC .CCU  
 Sau-5-8 ..... GGAC .AAC .GAAAUUAAUUUUUGUAA ..... AAA ..... UAUCAUUUC .UGUC .CCACUC .CCA  
 Sau-6-6 ..... GGAC .GAC .GAAAUUAAUUUUUGCUA ..... AAA ..... UAUGAUUUC .UGUC .CCACUC .CCU  
 Sha-1-1 ..... UGAC .AAC .GAAAUUAAUUUUUGGAGA ..... AAA ..... UAUAUUUC .UGUC .CCACUC .CCU  
 Sha-1-2 ..... GGAC .AAC .GAAAUUAAUUUUUGGAGA ..... AAA ..... UAUAUUUC .UGUC .CCACUC .CCA  
 Sha-1-3 ..... GGAC .AAC .GAAAUUAAUUUUUGGAGA ..... AAA ..... UAUAUUUC .UGUC .CCACUC .CCU  
 Sha-1-5 ..... GGAC .UAC .GAAAUUAAUUUUUGGAGA ..... AAA ..... UAUAUUUC .UGUC .CUACUC .CCU  
  
 <<<<<< ..... <<<<<<<< ..... >>>>>> . >>> . >>> .....  
 ??? ..... ???2??2 ..... ???2??2 . ??? . ??? .....  
 -----●RR●●AY-RAA●UC●-----R●A-----○○GA●UUY●●GYY-YRCY●-YY●







Sha-1-39 ..... AUGG . GAC . **CCUAGC** AAAGAGAAUUUCACAAAGAAAUUUCACAAGCUAAGCAA ..... **GCUGGGGAUCG** . GG**GC**CC . . CAG  
Ssa-1-7 ..... GGAC . UAC . **GAUAUC** UCUAUUAGA ..... AAA ..... UUUGAUUUUC . UGUC . CCACUC . . CCA  
..... <<<< <<<<<< <<<<<< <<<<<< <<<<<< <<<<<< ..... >>>>>> >>>> >>>> >>>> >>>> >>>> .....  
..... ??? ???? ???? ???? ???? ???? ..... ??? ???? ???? ???? .....  
-----●RR●●AY-RAA●UC○-----R●A-----○○GA●UUY-●GGY-YYRCY●--YY●

## References

- [1] Jeffrey E. Barrick, K. A. Corbino, W. C. Winkler, A. Nahvi, M. Mandal, J. Collins, M. Lee, A. Roth, N. Sudarsan, I. Jona, J. K. Wickiser, and Ronald R. Breaker. New RNA motifs suggest an expanded scope for riboswitches in bacterial genetic control. *Proceedings of the National Academy of Sciences of the United States of America*, 101(17):6421–6426, 2004.
- [2] Jakub Bielnicki, Yancho Devedjiev, Urszula Derewenda, Zbigniew Dauter, Andrzej Joachimiak, and Zygmunt S. Derewenda. *B. subtilis* ykuD protein at 2.0 Å resolution: Insights into the structure and function of a novel, ubiquitous family of bacterial enzymes. *Proteins*, 62:144–151, 2005.
- [3] Ryan T Fuchs, Frank J Grundy, and Tina M Henkin. The S(MK) box is a new SAM-binding RNA for translational regulation of SAM synthetase. *Nat Struct Mol Bio*, 13:226–33, 2006.
- [4] Shelley A. Haveman, Dawn E. Holmes, Yan-Huai R. Ding, Joy E. Ward, Jr. Raymond J. DiDonato, and Derek R. Lovley. *c*-type cytochromes in *Pelobacter carbinolicus*. *Appl Environ Microbiol*, 72:6980–5, 2006.
- [5] Dawn E. Holmes, Swades K. Chaudhuri, Kelly P. Nevin, Teena Mehta, Barbara A. Methé, Anna Liu, Joy E. Ward, Trevor L. Woodard, Jennifer Webster, and Derek R. Lovley. Microarray and genetic analysis of electron transfer to electrodes in *Geobacter sulfurreducens*. *Env Microbiol*, 8:1805–1815, 2006.
- [6] Byoung-Chan Kim, Xinlei Qian, Ching Leang, Maddalena V. Coppi, and Derek R. Lovley. Two putative *c*-type multiheme cytochromes required for the expression of OmcB, an outer membrane protein essential for optimal Fe(III) reduction in *Geobacter sulfurreducens*. *J Bact*, 188:3138–3142, 2006.
- [7] Derek R. Lovley. Bug juice: harvesting electricity with microorganisms. *Nat Rev Microbiol*, 4:497–508, 2006.
- [8] Teena Mehta, Maddalena V. Coppi, Susan E. Childers, and Derek R. Lovley. Outer membrane *c*-type cytochromes required for Fe(III) and Mn(IV) oxide reduction in *Geobacter sulfurreducens*. *Appl Environ Microbiol*, 71:8634–8641, 2005.
- [9] Karin L. Meibom, Xibing B. Li, Alex T. Nielsen, Cheng-Yen Wu, Saul Roseman, and Gary K. Schoolnik. The *Vibrio cholerae* chitin utilization program. *PNAS*, 101:2524–9, 2004.
- [10] Michinori Mutsuda and Masahiro Sugiura. Translation initiation of cyanobacterial *rbcS* mRNAs requires the 38 kDa ribosomal protein S1 but not the Shine-Dalgarno sequence: Development of a cyanobacterial in vitro translation system. *J Biol Chem*, 281:38314–21, 2006.

- [11] Martin G. Reese. Application of a time-delay neural network to promoter annotation in the *Drosophila melanogaster* genome. *Comput Chem*, 26:51–6, 2001.
- [12] Douglas B. Rusch, Aaron L. Halpern, Granger Sutton, Karla B. Heidelberg, Shannon Williamson, Shibu Yooseph, Dongying Wu, Jonathan A. Eisen, Jeff M. Hoffman, Karin Remington, Karen Beeson, Bao Tran, Hamilton Smith, Holly Baden-Tillson, Clare Stewart, Joyce Thorpe, Jason Freeman, Cynthia Andrews-Pfannkoch, Joseph E. Venter, Kelvin Li, Saul Kravitz, John F. Heidelberg, Terry Utterback, Yu-Hui Rogers, Luisa I. Falcón, Valeria Souza, Germán Bonilla-Rosso, Luis E. Eguiarte, David M. Karl, Shubha Sathyendranath, Trevor Platt, Eldredge Bermingham, Victor Gallardo, Giselle Tamayo-Castillo, Michael R. Ferrari<sup>1</sup>, Robert L. Strausberg, Kenneth Nealon, Robert Friedman, Marvin Frazier, and J. Craig Venter. The sorcerer ii global ocean sampling expedition: Northwest atlantic through eastern tropical pacific. *PLoS Biology*, 5:e77, 2007.
- [13] J D Thompson, D G Higgins, and T J Gibson. CLUSTAL W: improving the sensitivity of progressive multiple sequence alignment through sequence weighting, position-specific gap penalties and weight matrix choice. *Nucleic Acids Research*, 22(22):4673–4680, November 1994.
