# Supplementary material for: Identification of 22 candidate structured RNAs in bacteria using the CMfinder comparative genomics pipeline
Source: PubMed Central journal article supplement — Nucleic Acids Res. 2007 Jul 9;35(14):4809–19. doi: 10.1093/nar/gkm487 (PMC1950547; doi:10.1093/nar/gkm487), 2007-07-09
Supplement: nar_gkm487_2.pdf [file nar_gkm487_2.pdf]

The CMfinder comparative genomics pipeline discovers 22 novel putative RNAs in bacteria  
Supplementary Data: diagrams of all motifs

Zasha Weinberg, Jeffrey E. Barrick, Zizhen Yao, Adam Roth, Jane N. Kim, Jeremy Gore, Joy Xin Wang, Elaine R. Lee,  
Kirsten Block, Narasimhan Sudarsan, Shane Neph, Martin Tompa, Walter L. Ruzzo and Ronald R. Breaker

May 26, 2007

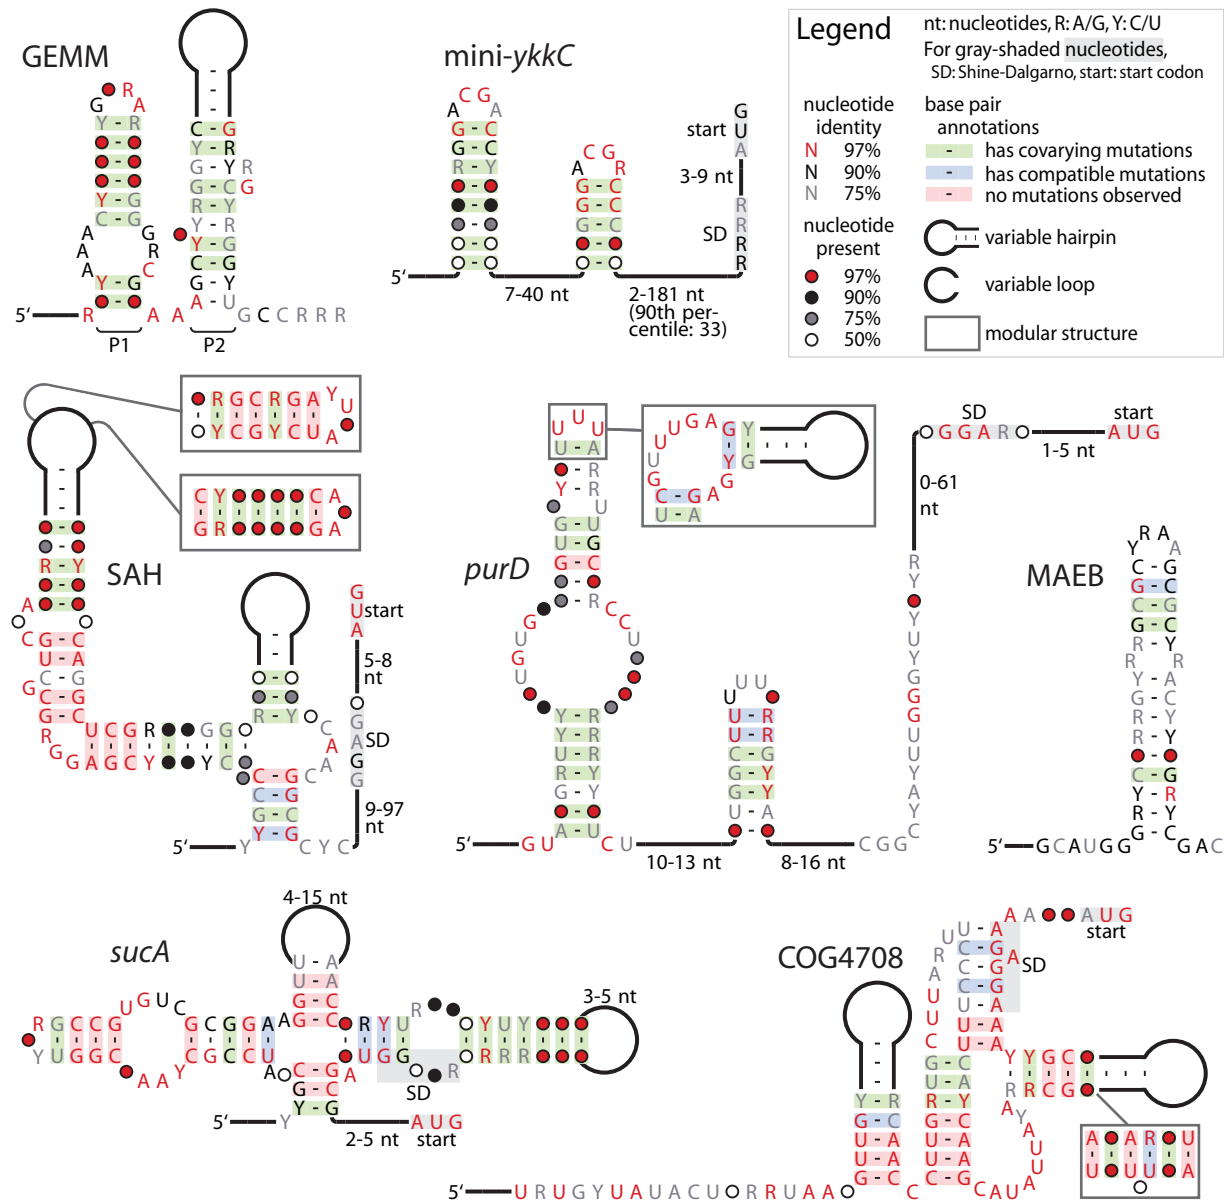

Figure 1: Complete motif consensus diagrams (part 1/4).

This is a duplicate of Figure 1 in the main paper, at high resolution. The remaining 3 pages are of motifs not drawn in the main paper. (Format is the same as Figure 1 in the main paper.)

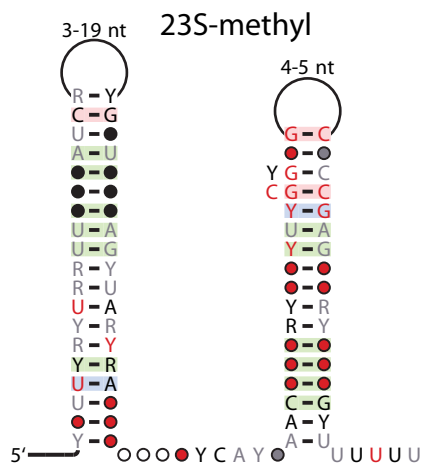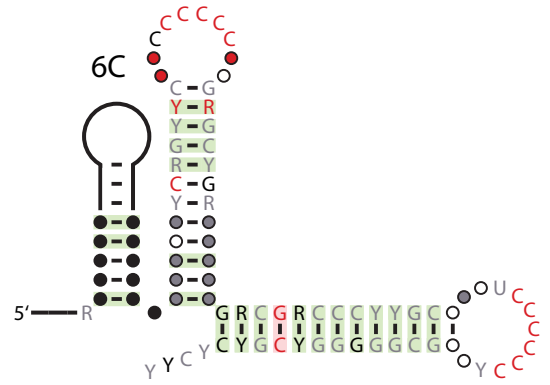

**Legend**

nt: nucleotides, SD: Shine-Dalgarno  
start: start codon, R: A/G, Y: C/U

|                     |                            |
|---------------------|----------------------------|
| nucleotide identity | base pair annotations      |
| N 97%               | - has covarying mutations  |
| N 90%               | - has compatible mutations |
| N 75%               | - no mutations observed    |

nucleotide present

- 97%
- 90%
- 75%
- 50%

variable hairpin

variable loop

modular structure

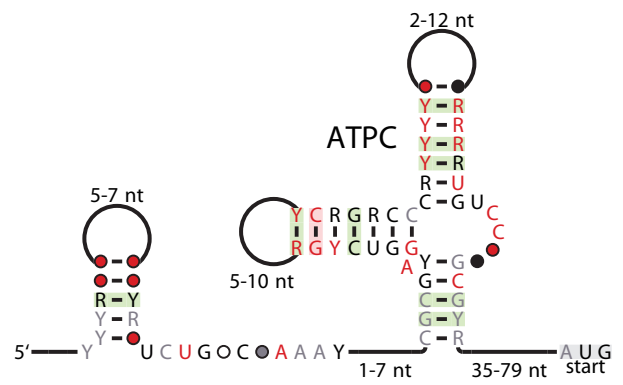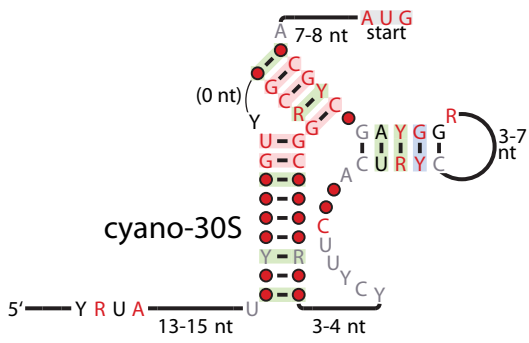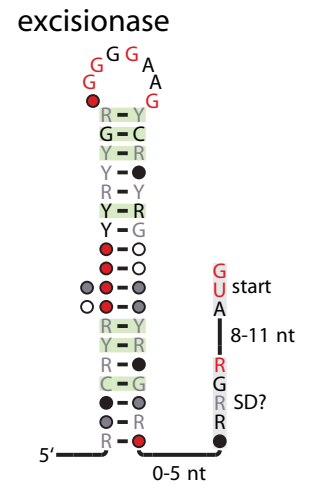

Figure 2: Complete motif consensus diagrams (part 2/4).  
(Format is the same as Figure 1 in the main paper.)



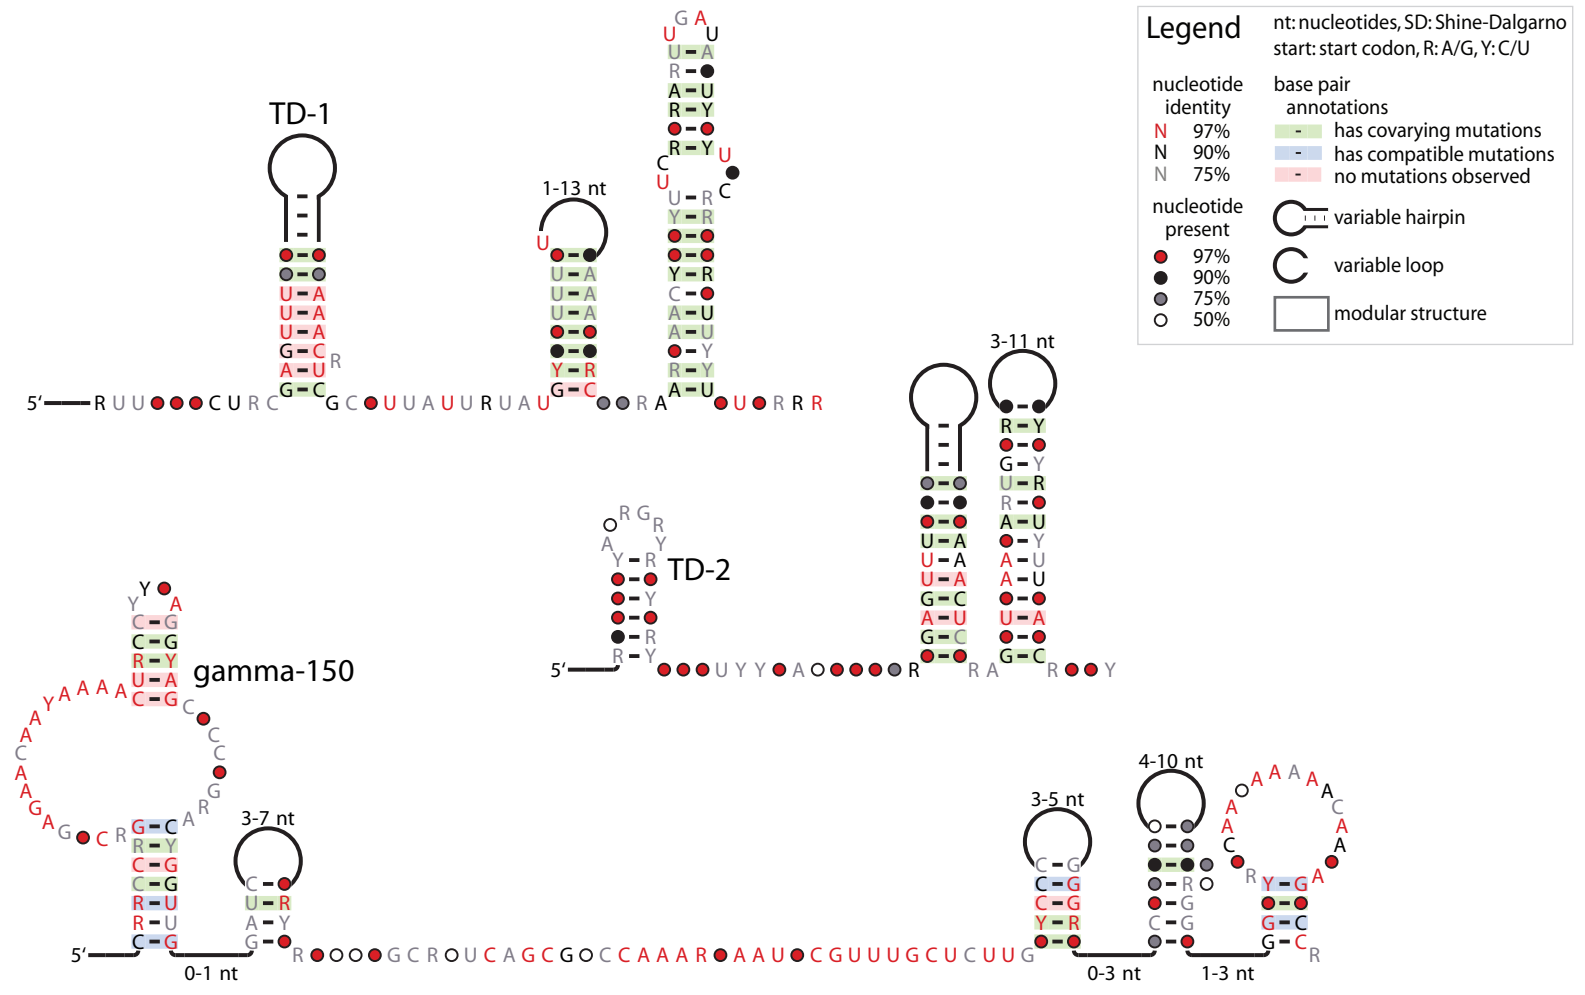

Figure 4: Complete motif consensus diagrams (part 4/4).

(Format is the same as Figure 1 in the main paper.)
