# Supplementary material for: Identification of 22 candidate structured RNAs in bacteria using the CMfinder comparative genomics pipeline
Source: PubMed Central journal article supplement — Nucleic Acids Res. 2007 Jul 9;35(14):4809–19. doi: 10.1093/nar/gkm487 (PMC1950547; doi:10.1093/nar/gkm487), 2007-07-09
Supplement: nar_gkm487_3.pdf [file nar_gkm487_3.pdf]

The following software and databases were used in this work.

Automated: explains how software/database was used in the automated pipeline.

Analysis: explains how software/database was used in subsequent non-automated analysis.

| Name                                         | Description                                                                                                                                                                                                                                                                                           | Reference |
|----------------------------------------------|-------------------------------------------------------------------------------------------------------------------------------------------------------------------------------------------------------------------------------------------------------------------------------------------------------|-----------|
| Conserved Domain Database (CDD) version 2.08 | Database of conserved domains, including descriptions of the domains, and profile HMMs. <u>Automated</u> and <u>Analysis</u> : used profile HMMs to classify domains within ORFs                                                                                                                      | (1)       |
| RefSeq versions 14 and 19                    | Database of genome sequences, and nucleotide positions of ORFs. ORF positions are used with the CDD to classify their domains. <u>Automated</u> : used version 14 to collect potential UTRs, and search for additional homologs in automated refinement of motifs. <u>Analysis</u> : used version 19. | (2)       |
| Rfam database version 7.0                    | Database of known structured RNAs. <u>Automated</u> : Used to mark known RNAs in motif predictions.                                                                                                                                                                                                   | (3)       |
| KEGG                                         | Database of information on metabolism and associated genes. <u>Analysis</u> : informed analysis of motifs.                                                                                                                                                                                            | (4)       |
| Acid mine drainage shotgun sequences         | <u>Analysis</u> : searched these sequences for homologs.                                                                                                                                                                                                                                              | (5)       |
| Sargasso Sea shotgun sequences               | <u>Analysis</u> : searched these sequences for homologs.                                                                                                                                                                                                                                              | (6)       |
| MicroFootPrinter                             | <u>Automated</u> : used to extract potential UTRs of genes, and, in some cases, to highlight promising motifs based on sequence conservation.                                                                                                                                                         | (7)       |
| CMfinder version 0.2                         | <u>Automated</u> : predicted motifs using potential homologous UTRs, and refined motifs using additional homologs. <u>Analysis</u> : assisted in manual improvement of alignments.                                                                                                                    | (8)       |
| RAVENNA version 0.2f                         | <u>Automated</u> and <u>Analysis</u> : homology searches for RNA motifs.                                                                                                                                                                                                                              | (9-11)    |
| Infernal version 0.7                         | Software integrated into RAVENNA. Implements covariance models, and GSC algorithm (used to establish levels of conservation/covariation in motif diagrams).                                                                                                                                           | (12)      |
| RSEARCH                                      | Software integrated into RAVENNA. Implements E-value statistics for covariance models.                                                                                                                                                                                                                | (13)      |
| Additional scripts                           | Some scripts were created specifically to support this pipeline.                                                                                                                                                                                                                                      | (14)      |

|            |                                                                                                                                                                                                                          |      |
|------------|--------------------------------------------------------------------------------------------------------------------------------------------------------------------------------------------------------------------------|------|
| RALEE      | <u>Analysis</u> : used to edit motif alignments.                                                                                                                                                                         | (15) |
| NCBI BLAST | <u>Analysis</u> : tblastn was used to find homologs of protein-coding genes, in order to search their potential UTRs. rpsblast was used to classify ORFs in RefSeq into profile HMMs from the Conserved Domain Database. | (16) |
| Mfold      | <u>Analysis</u> : used to predict potential structures, particularly for variable-length stems, whose identity might not be conserved among homologs.                                                                    | (17) |
| Rnall      | <u>Analysis</u> : used to predict rho-independent transcription terminator hairpins.                                                                                                                                     | (18) |

1. Marchler-Bauer, A., Anderson, J.B., Cherukuri, P.F., DeWeese-Scott, C., Geer, L.Y., Gwadz, M., He, S., Hurwitz, D.I., Jackson, J.D., Ke, Z. *et al.* (2005) CDD: a Conserved Domain Database for protein classification. *Nucleic Acids Research*, **33**, 192-196.
2. Pruitt, K., Tatusova, T. and Maglott, D. (2005) NCBI Reference Sequence (RefSeq): a curated non-redundant sequence database of genomes, transcripts and proteins. *Nucleic Acids Research*, **33**, 501-504.
3. Griffiths-Jones, S., Moxon, S., Marshall, M., Khanna, A., Eddy, S.R. and Bateman, A. (2005) Rfam: annotating non-coding RNAs in complete genomes. *Nucleic Acids Research*, **33**, 121-124.
4. Kanehisa, M., Goto, S., Hattori, M., Aoki-Kinoshita, K.F., Itoh, M., Kawashima, S., Katayama, T., Araki, M. and Hirakawa, M. (2006) From genomics to chemical genomics: new developments in KEGG. *Nucleic Acids Res*, **34**, D354-357.
5. Tyson, G.W., Chapman, J., Hugenholtz, P., Allen, E.E., Ram, R.J., Richardson, P.M., Solovyev, V.V., Rubin, E.M., Rokhsar, D.S. and Banfield, J.F. (2004) Community structure and metabolism through reconstruction of microbial genomes from the environment. *Nature*, **428**, 37-43.
6. Venter, J.C., Remington, K., Heidelberg, J.F., Halpern, A.L., Rusch, D., Eisen, J.A., Wu, D., Paulsen, I., Nelson, K.E., Nelson, W. *et al.* (2004) Environmental Genome Shotgun Sequencing of the Sargasso Sea. *Science*, **304**, 66-74.
7. Neph, S. and Tompa, M. (2006) MicroFootPrinter: a Tool for Phylogenetic Footprinting in Prokaryotic Genomes. *Nucleic Acids Research*, **34**.
8. Yao, Z., Weinberg, Z. and Ruzzo, W.L. (2006) CMfinder—a covariance model based RNA motif finding algorithm. *Bioinformatics*, **22**, 445-452.
9. Weinberg, Z. and Ruzzo, W.L. (2004), *RECOMB04: Proceedings of the Eighth Annual International Conference on Computational Molecular Biology*, San Diego, CA, pp. 243-251.
10. Weinberg, Z. and Ruzzo, W.L. (2004) Exploiting conserved structure for faster annotation of non-coding RNAs without loss of accuracy. *Bioinformatics*, **20**, i334-i341.
11. Weinberg, Z. and Ruzzo, W.L. (2006) Sequence-based heuristics for faster annotation of non-coding RNA families. *Bioinformatics*, **22**, 35-39.
12. Eddy, S.R. (2005) *Infernal User's Guide*.

13. Klein, R.J. and Eddy, S.R. (2003) RSEARCH: finding homologs of single structured RNA sequences. *BMC Bioinformatics*, **4**, 44.
14. Yao, Z., Barrick, J.E., Weinberg, Z., Neph, S., Breaker, R.R., Tompa, M. and Ruzzo, W.L. (2007) A computational pipeline for high throughput discovery of *cis*-regulatory noncoding RNA in prokaryotes. In press.
15. Griffiths-Jones, S. (2005) RALEE-RNA ALignment Editor in Emacs. *Bioinformatics*, **21**, 257-259.
16. Altschul, S.F., Madden, T.L., Schaffer, A.A., Zhang, J., Zhang, Z., Miller, W. and Lipman, D.J. (1997) Gapped BLAST and PSI-BLAST: a new generation of protein database search programs. *Nucleic Acids Research*, **25**, 3389-3402.
17. Zuker, M. (2003) Mfold web server for nucleic acid folding and hybridization prediction. *Nucleic Acids Res*, **31**, 3406-3415.
18. Wan, X.-F. and Xu, D. (2004) Intrinsic Terminator Prediction and Its Application in *Synechococcus* sp. WH8102. *J Comp Sci & Tech*, **20**, 465-482.
